# Supplementary material for: Genome-wide identification and oxacillinase OXA distribution characteristics of Acinetobacter spp. based on a global database
Source: Front Microbiol. 2023 Jun 1;14:1174200. doi: 10.3389/fmicb.2023.1174200 (PMC10267304; doi:10.3389/fmicb.2023.1174200)
Supplement: Supplementary file 1 [file Table_1.xlsx]

## Sheet: ANI for 6639 Acinetobacter spp 
Table S1. Averiage Nucleotide Identification Results for the 6639 strains downloaded
Genome_name	Type_strain	ANI_value	Assignment_name (ANI≥95)
Acinetobacter_sp._N54.MGS-139	Acinetobacter_calcoaceticus_CIP_81.8	73.8168	Acinetobacter_sp
Acinetobacter_sp._DF3-8	Acinetobacter_indicus_CIP_110367	73.8189	Acinetobacter_sp
Acinetobacter_baumannii_4300STDY7045877	Acinetobacter_pseudolwoffii_ANC_5044	73.9088	Acinetobacter_sp
Acinetobacter_baumannii_aba_imp	Acinetobacter_defluvii_WCHA30	73.9295	Acinetobacter_sp
Acinetobacter_marinus_ANC_3699	Acinetobacter_populi_PBJ7	76.7989	Acinetobacter_sp
Acinetobacter_qingfengensis_CCUG_69710T	Acinetobacter_populi_PBJ7	77.9262	Acinetobacter_sp
Acinetobacter_qingfengensis_ANC_4671	Acinetobacter_populi_PBJ7	77.9797	Acinetobacter_sp
Acinetobacter_apis_ANC_5114	Acinetobacter_rathckeae_EC24	78.3458	Acinetobacter_sp
Acinetobacter_calcoaceticus_JUb89	Acinetobacter_pullicarnis_S23	78.4897	Acinetobacter_sp
Acinetobacter_sp._DSM_11652	Acinetobacter_shaoyimingii_323-1	79.1918	Acinetobacter_sp
Acinetobacter_sp._YH12239	Acinetobacter_lanii_185	79.3075	Acinetobacter_sp
Acinetobacter_sp._YH16032	Acinetobacter_indicus_CIP_110367	79.5051	Acinetobacter_sp
Acinetobacter_sp._Ver3	Acinetobacter_indicus_CIP_110367	79.7213	Acinetobacter_sp
Acinetobacter_sp._B51_2017_B51_2017	Acinetobacter_wanghuae_dk386	79.7701	Acinetobacter_sp
Acinetobacter_johnsonii_AJ1	Acinetobacter_seohaensis_DSM_16313	79.8172	Acinetobacter_sp
Acinetobacter_sp._ANC_4648	Acinetobacter_bohemicus_ANC_3994	79.8318	Acinetobacter_sp
Acinetobacter_johnsonii_AJ-1	Acinetobacter_seohaensis_DSM_16313	79.8365	Acinetobacter_sp
Acinetobacter_sp._ANC_3832	Acinetobacter_piscicola_LW15	79.9302	Acinetobacter_sp
Acinetobacter_sp._TGL-Y2	Acinetobacter_lanii_185	80.2049	Acinetobacter_sp
Acinetobacter_sp._ANC_4558	Acinetobacter_equi_114	80.4772	Acinetobacter_sp
Acinetobacter_sp._ANC_4999	Acinetobacter_bohemicus_ANC_3994	80.6872	Acinetobacter_sp
Acinetobacter_sp._WCHAc010034	Acinetobacter_bouvetii_CIP_107468	81.6211	Acinetobacter_sp
Acinetobacter_sp._RF15A	Acinetobacter_variabilis_NIPH_2171	82.7112	Acinetobacter_sp
Acinetobacter_sp._RF15B	Acinetobacter_variabilis_NIPH_2171	82.7388	Acinetobacter_sp
Acinetobacter_sp._10FS3-1	Acinetobacter_variabilis_NIPH_2171	83.0759	Acinetobacter_sp
Acinetobacter_bouvetii_SFB21	Acinetobacter_terrae_ANC_4282	83.3688	Acinetobacter_sp
Acinetobacter_sp._NCu2D-2	Acinetobacter_wanghuae_dk386	83.3977	Acinetobacter_sp
Acinetobacter_sp._SA01	Acinetobacter_terrae_ANC_4282	83.4735	Acinetobacter_sp
Acinetobacter_sp._YH16039	Acinetobacter_terrae_ANC_4282	83.4893	Acinetobacter_sp
Acinetobacter_sp._ANC_4218	Acinetobacter_terrae_ANC_4282	83.5325	Acinetobacter_sp
Acinetobacter_sp._ANC_4216	Acinetobacter_terrae_ANC_4282	83.5367	Acinetobacter_sp
Acinetobacter_sp._YH01018	Acinetobacter_terrestris_ANC_4471	83.561	Acinetobacter_sp
Acinetobacter_sp._CS-2	Acinetobacter_terrae_ANC_4282	83.5622	Acinetobacter_sp
Acinetobacter_haemolyticus_w12	Acinetobacter_terrae_ANC_4282	83.6179	Acinetobacter_sp
Acinetobacter_sp._YH01022	Acinetobacter_terrae_ANC_4282	83.6489	Acinetobacter_sp
Acinetobacter_kookii_ANC_4667	Acinetobacter_terrae_ANC_4282	83.6508	Acinetobacter_sp
Acinetobacter_sp._YH01016	Acinetobacter_terrae_ANC_4282	83.6513	Acinetobacter_sp
Acinetobacter_sp._ANC_3813	Acinetobacter_bouvetii_CIP_107468	83.8722	Acinetobacter_sp
Acinetobacter_sp._ANC_5054	Acinetobacter_gandensis_CCUG_68482	83.9737	Acinetobacter_sp
Acinetobacter_sp._ANC_4945	Acinetobacter_gandensis_CCUG_68482	84.4055	Acinetobacter_sp
Acinetobacter_sp._ANC_3903	Acinetobacter_terrae_ANC_4282	84.4083	Acinetobacter_sp
Acinetobacter_sp._Marseille-P8049	Acinetobacter_ursingii_DSM_16037	84.5212	Acinetobacter_sp
Acinetobacter_beijerinckii_LMO_Bin59	Acinetobacter_junii_CIP_64.5	84.5286	Acinetobacter_sp
Acinetobacter_beijerinckii_GTC_14628	Acinetobacter_junii_CIP_64.5	84.5473	Acinetobacter_sp
Acinetobacter_sp._ANC_4169	Acinetobacter_terrae_ANC_4282	84.6134	Acinetobacter_sp
Acinetobacter_beijerinckii_ANC_3835	Acinetobacter_junii_CIP_64.5	84.6399	Acinetobacter_sp
Acinetobacter_sp._UBA3106	Acinetobacter_terrae_ANC_4282	84.6523	Acinetobacter_sp
Acinetobacter_beijerinckii_CIP_110307	Acinetobacter_junii_CIP_64.5	84.6827	Acinetobacter_sp
Acinetobacter_sp._YH12154	Acinetobacter_gandensis_ANC_4275	84.7006	Acinetobacter_sp
Acinetobacter_sp._YH12070	Acinetobacter_gandensis_CCUG_68482	84.7099	Acinetobacter_sp
Acinetobacter_cumulans_AC1	Acinetobacter_gandensis_ANC_4275	84.7115	Acinetobacter_sp
Acinetobacter_sp._YH12087	Acinetobacter_gandensis_CCUG_68482	84.7227	Acinetobacter_sp
Acinetobacter_sp._YH12231	Acinetobacter_gandensis_ANC_4275	84.7322	Acinetobacter_sp
Acinetobacter_sp._YH12152	Acinetobacter_gandensis_ANC_4275	84.7337	Acinetobacter_sp
Acinetobacter_sp._YH12218	Acinetobacter_gandensis_CCUG_68482	84.738	Acinetobacter_sp
Acinetobacter_sp._YH12097	Acinetobacter_gandensis_CCUG_68482	84.7477	Acinetobacter_sp
Acinetobacter_sp._YH01009	Acinetobacter_gandensis_ANC_4275	84.7502	Acinetobacter_sp
Acinetobacter_sp._YH16056	Acinetobacter_gandensis_CCUG_68482	84.7988	Acinetobacter_sp
Acinetobacter_sp._YH12250	Acinetobacter_gandensis_ANC_4275	84.802	Acinetobacter_sp
Acinetobacter_sp._YH12039	Acinetobacter_gandensis_ANC_4275	84.8044	Acinetobacter_sp
Acinetobacter_sp._YH12052	Acinetobacter_gandensis_CCUG_68482	84.8137	Acinetobacter_sp
Acinetobacter_sp._YH12036	Acinetobacter_gandensis_CCUG_68482	84.816	Acinetobacter_sp
Acinetobacter_sp._YH12142	Acinetobacter_gandensis_ANC_4275	84.8174	Acinetobacter_sp
Acinetobacter_sp._YH01010	Acinetobacter_gandensis_ANC_4275	84.8213	Acinetobacter_sp
Acinetobacter_sp._YH12054	Acinetobacter_gandensis_CCUG_68482	84.8252	Acinetobacter_sp
Acinetobacter_sp._YH16040	Acinetobacter_gandensis_CCUG_68482	84.8326	Acinetobacter_sp
Acinetobacter_sp._YH12109	Acinetobacter_gandensis_ANC_4275	84.8346	Acinetobacter_sp
Acinetobacter_sp._YH12082	Acinetobacter_gandensis_CCUG_68482	84.8446	Acinetobacter_sp
Acinetobacter_baumannii_PL81	Acinetobacter_junii_CIP_64.5	84.8486	Acinetobacter_sp
Acinetobacter_sp._YH12096	Acinetobacter_gandensis_ANC_4275	84.8502	Acinetobacter_sp
Acinetobacter_sp._YH16055	Acinetobacter_gandensis_CCUG_68482	84.8564	Acinetobacter_sp
Acinetobacter_sp._CFCC_10889	Acinetobacter_defluvii_WCHA30	84.8642	Acinetobacter_sp
Acinetobacter_sp._YH12094	Acinetobacter_gandensis_CCUG_68482	84.8642	Acinetobacter_sp
Acinetobacter_sp._YH12062	Acinetobacter_gandensis_ANC_4275	84.8747	Acinetobacter_sp
Acinetobacter_sp._YH12064	Acinetobacter_gandensis_ANC_4275	84.8765	Acinetobacter_sp
Acinetobacter_sp._YH12219	Acinetobacter_gandensis_CCUG_68482	84.8806	Acinetobacter_sp
Acinetobacter_sp._YH16057	Acinetobacter_gandensis_CCUG_68482	84.8857	Acinetobacter_sp
Acinetobacter_sp._YH01020	Acinetobacter_gandensis_CCUG_68482	84.8884	Acinetobacter_sp
Acinetobacter_sp._YH12144	Acinetobacter_gandensis_CCUG_68482	84.8903	Acinetobacter_sp
Acinetobacter_sp._YH12063	Acinetobacter_gandensis_ANC_4275	84.8979	Acinetobacter_sp
Acinetobacter_sp._YH12083	Acinetobacter_gandensis_CCUG_68482	84.9013	Acinetobacter_sp
Acinetobacter_sp._YH12027	Acinetobacter_gandensis_CCUG_68482	84.9129	Acinetobacter_sp
Acinetobacter_sp._YH12080	Acinetobacter_gandensis_CCUG_68482	84.9178	Acinetobacter_sp
Acinetobacter_sp._YH16042	Acinetobacter_gandensis_CCUG_68482	84.918	Acinetobacter_sp
Acinetobacter_sp._YH12061	Acinetobacter_gandensis_ANC_4275	84.9215	Acinetobacter_sp
Acinetobacter_sp._YH16044	Acinetobacter_gandensis_CCUG_68482	84.9249	Acinetobacter_sp
Acinetobacter_sp._YH12081	Acinetobacter_gandensis_CCUG_68482	84.9295	Acinetobacter_sp
Acinetobacter_sp._CFCC_11171	Acinetobacter_gandensis_CCUG_68482	84.9296	Acinetobacter_sp
Acinetobacter_sp._YH12140	Acinetobacter_gandensis_CCUG_68482	84.9402	Acinetobacter_sp
Acinetobacter_sp._YH1901130	Acinetobacter_gandensis_CCUG_68482	84.9458	Acinetobacter_sp
Acinetobacter_sp._YH12025	Acinetobacter_gandensis_CCUG_68482	84.9492	Acinetobacter_sp
Acinetobacter_sp._YH01024	Acinetobacter_gandensis_CCUG_68482	84.9506	Acinetobacter_sp
Acinetobacter_sp._YH12049	Acinetobacter_gandensis_CCUG_68482	84.9571	Acinetobacter_sp
Acinetobacter_sp._YH12057	Acinetobacter_gandensis_ANC_4275	84.9602	Acinetobacter_sp
Acinetobacter_sp._YH12085	Acinetobacter_gandensis_CCUG_68482	84.968	Acinetobacter_sp
Acinetobacter_sp._YH12073	Acinetobacter_gandensis_CCUG_68482	84.9712	Acinetobacter_sp
Acinetobacter_sp._YH01005	Acinetobacter_gandensis_CCUG_68482	84.9748	Acinetobacter_sp
Acinetobacter_sp._YH12138	Acinetobacter_gandensis_ANC_4275	84.9776	Acinetobacter_sp
Acinetobacter_sp._ANC_5600	Acinetobacter_gandensis_CCUG_68482	84.9791	Acinetobacter_sp
Acinetobacter_sp._YH12069	Acinetobacter_gandensis_ANC_4275	84.9841	Acinetobacter_sp
Acinetobacter_sp._YH12123	Acinetobacter_gandensis_CCUG_68482	84.9877	Acinetobacter_sp
Acinetobacter_sp._YH12129	Acinetobacter_gandensis_CCUG_68482	85.0022	Acinetobacter_sp
Acinetobacter_sp._YH12128	Acinetobacter_gandensis_CCUG_68482	85.0046	Acinetobacter_sp
Acinetobacter_sp._YH16037	Acinetobacter_gandensis_CCUG_68482	85.0058	Acinetobacter_sp
Acinetobacter_sp._YH12040	Acinetobacter_gandensis_ANC_4275	85.0275	Acinetobacter_sp
Acinetobacter_sp._YH12251	Acinetobacter_gandensis_ANC_4275	85.0288	Acinetobacter_sp
Acinetobacter_sp._YH12086	Acinetobacter_gandensis_CCUG_68482	85.0578	Acinetobacter_sp
Acinetobacter_sp._YH12138_YH12138_T	Acinetobacter_gandensis_ANC_4275	85.0628	Acinetobacter_sp
Acinetobacter_sp._YH1901134	Acinetobacter_gandensis_ANC_4275	85.0653	Acinetobacter_sp
Acinetobacter_sp._YH12066	Acinetobacter_gandensis_CCUG_68482	85.0676	Acinetobacter_sp
Acinetobacter_sp._YH12045	Acinetobacter_gandensis_CCUG_68482	85.076	Acinetobacter_sp
Acinetobacter_sp._MB5	Acinetobacter_brisouii_CIP_110357	85.0791	Acinetobacter_sp
Acinetobacter_sp._YH12126	Acinetobacter_gandensis_CCUG_68482	85.1008	Acinetobacter_sp
Acinetobacter_sp._YH12210	Acinetobacter_sichuanensis_WCHAc060041	85.1152	Acinetobacter_sp
Acinetobacter_sp._YH12207	Acinetobacter_sichuanensis_WCHAc060041	85.117	Acinetobacter_sp
Acinetobacter_sp._YH12145	Acinetobacter_gandensis_CCUG_68482	85.1355	Acinetobacter_sp
Acinetobacter_brisouii_TUM15068	Acinetobacter_brisouii_CIP_110357	85.1483	Acinetobacter_sp
Acinetobacter_sp._YH12209	Acinetobacter_sichuanensis_WCHAc060041	85.1484	Acinetobacter_sp
Acinetobacter_sp._YH12068	Acinetobacter_gandensis_ANC_4275	85.1547	Acinetobacter_sp
Acinetobacter_sp._YH12206	Acinetobacter_sichuanensis_WCHAc060041	85.1607	Acinetobacter_sp
Acinetobacter_sp._YH12076	Acinetobacter_gandensis_CCUG_68482	85.1615	Acinetobacter_sp
Acinetobacter_piscicola_YH12207_T	Acinetobacter_sichuanensis_WCHAc060041	85.1641	Acinetobacter_sp
Acinetobacter_sp._YH12029	Acinetobacter_gandensis_CCUG_68482	85.1646	Acinetobacter_sp
Acinetobacter_sp._YH12098	Acinetobacter_gandensis_CCUG_68482	85.1742	Acinetobacter_sp
Acinetobacter_sp._YH12023	Acinetobacter_gandensis_CCUG_68482	85.1888	Acinetobacter_sp
Acinetobacter_sp._YH12079	Acinetobacter_gandensis_CCUG_68482	85.19	Acinetobacter_sp
Acinetobacter_piscicola_C1T1-2_a	Acinetobacter_sichuanensis_WCHAc060041	85.3255	Acinetobacter_sp
Acinetobacter_boissieri_ANC_4422	Acinetobacter_rathckeae_EC24	85.386	Acinetobacter_sp
Acinetobacter_sp._S40	Acinetobacter_guerrae_AC_1271	85.4003	Acinetobacter_sp
Acinetobacter_sp._S54	Acinetobacter_guerrae_AC_1271	85.4015	Acinetobacter_sp
Acinetobacter_sp._S55	Acinetobacter_guerrae_AC_1271	85.4462	Acinetobacter_sp
Acinetobacter_sp._Marseille-Q1623	Acinetobacter_sichuanensis_WCHAc060041	85.7716	Acinetobacter_sp
Acinetobacter_sp._ANC_3929	Acinetobacter_proteolyticus_NIPH_809	86.591	Acinetobacter_sp
Acinetobacter_sp._NIPH_2100	Acinetobacter_gyllenbergii_CIP_110306	86.8064	Acinetobacter_sp
Acinetobacter_sp._YIM_103518	Acinetobacter_portensis_AC_877	87.3114	Acinetobacter_sp
Acinetobacter_sp._A47	Acinetobacter_courvalinii_CCUG_67960	87.7612	Acinetobacter_sp
Acinetobacter_sp._LoGeW2-3	Acinetobacter_schindleri_CIP_107287	87.9569	Acinetobacter_sp
Acinetobacter_sp._P8-3-8	Acinetobacter_piscicola_LW15	88.4086	Acinetobacter_sp
Acinetobacter_towneri_AT1	Acinetobacter_seohaensis_DSM_16313	88.6405	Acinetobacter_sp
Acinetobacter_sp._A2	Acinetobacter_seohaensis_DSM_16313	88.6736	Acinetobacter_sp
Acinetobacter_sp._A1	Acinetobacter_seohaensis_DSM_16313	88.7483	Acinetobacter_sp
Acinetobacter_sp._A3	Acinetobacter_seohaensis_DSM_16313	88.7662	Acinetobacter_sp
Acinetobacter_sp._NIPH_1867	Acinetobacter_proteolyticus_NIPH_809	88.8315	Acinetobacter_sp
Acinetobacter_sp._ANC_4105	Acinetobacter_proteolyticus_NIPH_809	88.8407	Acinetobacter_sp
Acinetobacter_sp._ANC_3781	Acinetobacter_terrae_ANC_4282	88.9006	Acinetobacter_sp
Acinetobacter_sp._BY484	Acinetobacter_lwoffii_CIP_64.10	89.0023	Acinetobacter_sp
Acinetobacter_dispersus_NCCP_16014	Acinetobacter_proteolyticus_NIPH_809	89.0055	Acinetobacter_sp
Acinetobacter_sp._SWAC57	Acinetobacter_johnsonii_DSM_6963	89.1131	Acinetobacter_sp
Acinetobacter_sp._BY419	Acinetobacter_lwoffii_CIP_64.10	89.1296	Acinetobacter_sp
Acinetobacter_sp._TUM15071	Acinetobacter_proteolyticus_NIPH_809	89.1806	Acinetobacter_sp
Acinetobacter_sp._SFB	Acinetobacter_terrestris_ANC_4471	89.1823	Acinetobacter_sp
Acinetobacter_sp._Tr-809	Acinetobacter_proteolyticus_NIPH_809	89.1851	Acinetobacter_sp
Acinetobacter_sp._ANC_4204	Acinetobacter_johnsonii_DSM_6963	89.2392	Acinetobacter_sp
Acinetobacter_sp._ANC_4779	Acinetobacter_terrestris_ANC_4471	89.2997	Acinetobacter_sp
Acinetobacter_sp._TUM15064	Acinetobacter_johnsonii_CIP_64.6	89.3397	Acinetobacter_sp
Acinetobacter_sp._WCHAc060042	Acinetobacter_johnsonii_CIP_64.6	89.3516	Acinetobacter_sp
Acinetobacter_towneri_ZZC3-9	Acinetobacter_seohaensis_DSM_16313	89.5569	Acinetobacter_sp
Acinetobacter_baumannii_ACIN00150	Acinetobacter_bereziniae_LMG_1003	89.6361	Acinetobacter_sp
Acinetobacter_sp._Res13-Abat-PEC04-P4b-01	Acinetobacter_bereziniae_LMG_1003	89.778	Acinetobacter_sp
Acinetobacter_sp._Res13-Abat-PEC02-P3-01	Acinetobacter_bereziniae_LMG_1003	89.7906	Acinetobacter_sp
Acinetobacter_sp._Res13-Abat-PEC08-P2-01	Acinetobacter_bereziniae_LMG_1003	89.792	Acinetobacter_sp
Acinetobacter_sp._Res13-Abat-PEC14-P4-01	Acinetobacter_bereziniae_LMG_1003	89.7932	Acinetobacter_sp
Acinetobacter_sp._Res13-Abat-PEC07-P2-02	Acinetobacter_bereziniae_LMG_1003	89.8097	Acinetobacter_sp
Acinetobacter_sp._Res13-Abat-PEC10-P4-01	Acinetobacter_bereziniae_LMG_1003	89.8146	Acinetobacter_sp
Acinetobacter_sp._Res13-Abat-PEC12-P3-01	Acinetobacter_bereziniae_LMG_1003	89.8371	Acinetobacter_sp
Acinetobacter_sp._Res13-Abat-PEC15-P4-01	Acinetobacter_bereziniae_LMG_1003	89.8386	Acinetobacter_sp
Acinetobacter_lwoffii_DE0136	Acinetobacter_lwoffii_CIP_64.10	90.22	Acinetobacter_sp
Acinetobacter_sp._SFD	Acinetobacter_lwoffii_CIP_64.10	90.2392	Acinetobacter_sp
Acinetobacter_sp._SFA	Acinetobacter_lwoffii_CIP_64.10	90.247	Acinetobacter_sp
Acinetobacter_sp._Sa1BUA6	Acinetobacter_lwoffii_CIP_64.10	90.3402	Acinetobacter_sp
Acinetobacter_sp._ANC_4173	Acinetobacter_tandoii_DSM_14970	90.754	Acinetobacter_sp
Acinetobacter_sp._ANC_4910	Acinetobacter_tandoii_DSM_14970	90.8084	Acinetobacter_sp
Acinetobacter_sp._Marseille-Q1618	Acinetobacter_defluvii_WCHA30	90.9566	Acinetobacter_sp
Acinetobacter_sp._ANC_4178	Acinetobacter_tandoii_DSM_14970	91.0674	Acinetobacter_sp
Acinetobacter_sp._CIP_110321	Acinetobacter_proteolyticus_NIPH_809	91.1668	Acinetobacter_sp
Acinetobacter_sp._ANC_4470	Acinetobacter_bohemicus_ANC_3994	91.2433	Acinetobacter_sp
Acinetobacter_calcoaceticus_ACIN00260	Acinetobacter_calcoaceticus_CIP_81.8	91.2596	Acinetobacter_sp
Acinetobacter_sp._TG19627	Acinetobacter_proteolyticus_NIPH_809	91.3098	Acinetobacter_sp
Acinetobacter_sp._Marseille-P8610	Acinetobacter_proteolyticus_NIPH_809	91.3362	Acinetobacter_sp
Acinetobacter_sp._CIP_70.18	Acinetobacter_proteolyticus_NIPH_809	91.3555	Acinetobacter_sp
Acinetobacter_sp._CIP_56.2	Acinetobacter_proteolyticus_NIPH_809	91.3949	Acinetobacter_sp
Acinetobacter_sp._ANC_3880	Acinetobacter_proteolyticus_NIPH_809	91.4136	Acinetobacter_sp
Acinetobacter_sp._MN12	Acinetobacter_proteolyticus_NIPH_809	91.4961	Acinetobacter_sp
Acinetobacter_sp._UBA991	Acinetobacter_proteolyticus_NIPH_809	91.5257	Acinetobacter_sp
Acinetobacter_puyangensis_ANC_4466	Acinetobacter_populi_PBJ7	91.6104	Acinetobacter_sp
Acinetobacter_sp._Ac_3412	Acinetobacter_proteolyticus_NIPH_809	91.6687	Acinetobacter_sp
Acinetobacter_sp._AM	Acinetobacter_tandoii_DSM_14970	91.789	Acinetobacter_sp
Acinetobacter_sp._Ac_5812	Acinetobacter_gyllenbergii_CIP_110306	91.8319	Acinetobacter_sp
Acinetobacter_haemolyticus_KCRI-348C	Acinetobacter_haemolyticus_MTCC_9819	92.5351	Acinetobacter_sp
Acinetobacter_sp._ANC_4862	Acinetobacter_terrae_ANC_4282	92.6273	Acinetobacter_sp
Acinetobacter_sp._ANC_5378	Acinetobacter_terrae_ANC_4282	92.6379	Acinetobacter_sp
Acinetobacter_sp._ANC_5414	Acinetobacter_terrae_ANC_4282	92.7007	Acinetobacter_sp
Acinetobacter_sp._WCHA55	Acinetobacter_johnsonii_CIP_64.6	92.7926	Acinetobacter_sp
Acinetobacter_kyonggiensis_ANC_5109	Acinetobacter_bohemicus_ANC_3994	92.9457	Acinetobacter_sp
Acinetobacter_sp._WC-141	Acinetobacter_oleivorans_DR1	92.9671	Acinetobacter_sp
Acinetobacter_sp._ANC_4641	Acinetobacter_brisouii_CIP_110357	92.982	Acinetobacter_sp
Acinetobacter_sp._105-3	Acinetobacter_oleivorans_DR1	93.1677	Acinetobacter_sp
Acinetobacter_sp._ANC_4973	Acinetobacter_bohemicus_ANC_3994	93.1948	Acinetobacter_sp
Acinetobacter_sp._NIPH_298	Acinetobacter_halotolerans_JCM_31009	93.2158	Acinetobacter_sp
Acinetobacter_sp._CIP-A165_CIP_A165	Acinetobacter_halotolerans_JCM_31009	93.2862	Acinetobacter_sp
Acinetobacter_sp._UBA801	Acinetobacter_towneri_DSM_14962	93.335	Acinetobacter_sp
Acinetobacter_sp._ANC_4633	Acinetobacter_brisouii_CIP_110357	93.4843	Acinetobacter_sp
Acinetobacter_calcoaceticus_Aci00895	Acinetobacter_calcoaceticus_CIP_81.8	93.5342	Acinetobacter_sp
Acinetobacter_sp._C16S1	Acinetobacter_haemolyticus_MTCC_9819	93.5804	Acinetobacter_sp
Acinetobacter_oleivorans_PF1	Acinetobacter_calcoaceticus_CIP_81.8	93.6003	Acinetobacter_sp
Acinetobacter_calcoaceticus_GK2	Acinetobacter_calcoaceticus_CIP_81.8	93.6666	Acinetobacter_sp
Acinetobacter_sp._MDS7A	Acinetobacter_seohaensis_DSM_16313	93.6688	Acinetobacter_sp
Acinetobacter_sp._ANC_4654	Acinetobacter_bohemicus_ANC_3994	93.7355	Acinetobacter_sp
Acinetobacter_towneri_5-2Ac02	Acinetobacter_towneri_DSM_14962	93.7736	Acinetobacter_sp
Acinetobacter_calcoaceticus_Acinetobacter_calcoaceticus_str._2117	Acinetobacter_calcoaceticus_DSM_30006	93.8062	Acinetobacter_sp
Acinetobacter_sp._ANC_3791	Acinetobacter_brisouii_CIP_110357	93.8545	Acinetobacter_sp
Acinetobacter_sp._ANC_3789	Acinetobacter_brisouii_CIP_110357	93.8933	Acinetobacter_sp
Acinetobacter_pittii_ANC_4050	Acinetobacter_lactucae_NRRL_B-41902	93.966	Acinetobacter_sp
Acinetobacter_pittii_HW4Z	Acinetobacter_lactucae_NRRL_B-41902	94.0219	Acinetobacter_sp
Acinetobacter_sp._ANC_4635	Acinetobacter_brisouii_CIP_110357	94.0404	Acinetobacter_sp
Acinetobacter_calcoaceticus_ANC_3811	Acinetobacter_oleivorans_KCTC_23045	94.2954	Acinetobacter_sp
Acinetobacter_sp._NIPH_284	Acinetobacter_modestus_CCM_8639	94.3446	Acinetobacter_sp
Acinetobacter_baumannii_573719	Acinetobacter_pittii_ATCC_19004	94.3821	Acinetobacter_sp
Acinetobacter_pittii_AC15156	Acinetobacter_pittii_ATCC_19004	94.3846	Acinetobacter_sp
Acinetobacter_sp._SwsAc4	Acinetobacter_modestus_CCM_8639	94.4275	Acinetobacter_sp
Acinetobacter_pittii_ACIN00201	Acinetobacter_pittii_DSM_25618	94.4325	Acinetobacter_sp
Acinetobacter_pittii_ACIN00162	Acinetobacter_pittii_DSM_25618	94.4964	Acinetobacter_sp
Acinetobacter_sp._WCHA29	Acinetobacter_modestus_CCM_8639	94.5005	Acinetobacter modestus
Acinetobacter_pittii_MCR8900	Acinetobacter_pittii_ATCC_19004	94.5085	Acinetobacter pittii
Acinetobacter_sp._WCHA39	Acinetobacter_modestus_CCM_8639	94.5311	Acinetobacter modestus
Acinetobacter_baumannii_WPB103	Acinetobacter_modestus_CCM_8639	94.5513	Acinetobacter modestus
Acinetobacter_pittii_ACIN00165	Acinetobacter_pittii_ATCC_19004	94.5548	Acinetobacter pittii
Acinetobacter_sp._WCHA45	Acinetobacter_modestus_CCM_8639	94.639	Acinetobacter modestus
Acinetobacter_pittii_ABBL016	Acinetobacter_pittii_DSM_25618	94.6619	Acinetobacter pittii
Acinetobacter_baumannii_NCTC_7422	Acinetobacter_colistiniresistens_NIPH_2036	94.7713	Acinetobacter colistiniresistens
Acinetobacter_sp._TUM15521	Acinetobacter_colistiniresistens_NIPH_2036	94.7747	Acinetobacter colistiniresistens
Acinetobacter_sp._CIP_64.2	Acinetobacter_colistiniresistens_NIPH_2036	94.8	Acinetobacter colistiniresistens
Acinetobacter_sp._NBRC_110496	Acinetobacter_colistiniresistens_NIPH_2036	94.8569	Acinetobacter colistiniresistens
Acinetobacter_colistiniresistens_NR1165	Acinetobacter_colistiniresistens_NIPH_2036	94.9455	Acinetobacter colistiniresistens
Acinetobacter_sp._YH16031	Acinetobacter_variabilis_NIPH_2171	94.9806	Acinetobacter variabilis
Acinetobacter_sp._YH12046	Acinetobacter_variabilis_NIPH_2171	94.9834	Acinetobacter variabilis
Acinetobacter_sp._GFQ9D192M	Acinetobacter_variabilis_NIPH_2171	95.0587	Acinetobacter variabilis
Acinetobacter_sp._YH1901152	Acinetobacter_variabilis_NIPH_2171	95.0725	Acinetobacter variabilis
Acinetobacter_sp._GFQ9D191M	Acinetobacter_variabilis_NIPH_2171	95.0768	Acinetobacter variabilis
Acinetobacter_sp._YH12108	Acinetobacter_variabilis_NIPH_2171	95.0869	Acinetobacter variabilis
Acinetobacter_sp._YH12035	Acinetobacter_variabilis_NIPH_2171	95.091	Acinetobacter variabilis
Acinetobacter_sp._YH16049	Acinetobacter_variabilis_NIPH_2171	95.1111	Acinetobacter variabilis
Acinetobacter_sp._YH12243	Acinetobacter_variabilis_NIPH_2171	95.1139	Acinetobacter variabilis
Acinetobacter_sp._YH12236	Acinetobacter_variabilis_NIPH_2171	95.1257	Acinetobacter variabilis
Acinetobacter_sp._YH12047	Acinetobacter_variabilis_NIPH_2171	95.144	Acinetobacter variabilis
Acinetobacter_sp._YH12233	Acinetobacter_variabilis_NIPH_2171	95.1443	Acinetobacter variabilis
Acinetobacter_sp._YH12137	Acinetobacter_variabilis_NIPH_2171	95.1689	Acinetobacter variabilis
Acinetobacter_sp._YH12043	Acinetobacter_variabilis_NIPH_2171	95.2008	Acinetobacter variabilis
Acinetobacter_sp._YH12235	Acinetobacter_variabilis_NIPH_2171	95.2077	Acinetobacter variabilis
Acinetobacter_sp._YH16038	Acinetobacter_variabilis_NIPH_2171	95.2123	Acinetobacter variabilis
Acinetobacter_sp._YH12141	Acinetobacter_variabilis_NIPH_2171	95.2194	Acinetobacter variabilis
Acinetobacter_sp._YH12143	Acinetobacter_variabilis_NIPH_2171	95.2357	Acinetobacter variabilis
Acinetobacter_sp._YH12248	Acinetobacter_variabilis_NIPH_2171	95.2359	Acinetobacter variabilis
Acinetobacter_sp._YH12041	Acinetobacter_variabilis_NIPH_2171	95.2443	Acinetobacter variabilis
Acinetobacter_sp._YH12245	Acinetobacter_variabilis_NIPH_2171	95.2471	Acinetobacter variabilis
Acinetobacter_variabilis_XM9F202-2	Acinetobacter_variabilis_NIPH_2171	95.2522	Acinetobacter variabilis
Acinetobacter_sp._YH12072	Acinetobacter_variabilis_NIPH_2171	95.2617	Acinetobacter variabilis
Acinetobacter_sp._YH12242	Acinetobacter_variabilis_NIPH_2171	95.2702	Acinetobacter variabilis
Acinetobacter_sp._YH12249	Acinetobacter_variabilis_NIPH_2171	95.2913	Acinetobacter variabilis
Acinetobacter_sp._YH12244	Acinetobacter_variabilis_NIPH_2171	95.3097	Acinetobacter variabilis
Acinetobacter_sp._YH12241	Acinetobacter_variabilis_NIPH_2171	95.3109	Acinetobacter variabilis
Acinetobacter_sp._YH12247	Acinetobacter_variabilis_NIPH_2171	95.3136	Acinetobacter variabilis
Acinetobacter_variabilis_SCsl29	Acinetobacter_variabilis_NIPH_2171	95.32	Acinetobacter variabilis
Acinetobacter_sp._2JN-4	Acinetobacter_halotolerans_JCM_31009	95.3712	Acinetobacter halotolerans
Acinetobacter_oleivorans_TUM16158	Acinetobacter_oleivorans_DR1	95.389	Acinetobacter oleivorans
Acinetobacter_oleivorans_TUM16157	Acinetobacter_oleivorans_DR1	95.3898	Acinetobacter oleivorans
Acinetobacter_oleivorans_TUM15403	Acinetobacter_oleivorans_DR1	95.4172	Acinetobacter oleivorans
Acinetobacter_oleivorans_TUM16156	Acinetobacter_oleivorans_DR1	95.419	Acinetobacter oleivorans
Acinetobacter_oleivorans_TUM16159	Acinetobacter_oleivorans_DR1	95.4216	Acinetobacter oleivorans
Acinetobacter_oleivorans_TUM16161	Acinetobacter_oleivorans_DR1	95.4278	Acinetobacter oleivorans
Acinetobacter_oleivorans_TUM16160	Acinetobacter_oleivorans_DR1	95.4376	Acinetobacter oleivorans
Acinetobacter_oleivorans_TUM16163	Acinetobacter_oleivorans_DR1	95.4393	Acinetobacter oleivorans
Acinetobacter_oleivorans_TUM16164	Acinetobacter_oleivorans_DR1	95.4422	Acinetobacter oleivorans
Acinetobacter_oleivorans_TUM15155	Acinetobacter_oleivorans_DR1	95.4542	Acinetobacter oleivorans
Acinetobacter_oleivorans_TUM16162	Acinetobacter_oleivorans_DR1	95.4574	Acinetobacter oleivorans
Acinetobacter_terrestris_ANC_4249	Acinetobacter_terrestris_ANC_4471	95.4677	Acinetobacter terrestris
Acinetobacter_sp._JW	Acinetobacter_oleivorans_DR1	95.52	Acinetobacter oleivorans
Acinetobacter_sp._NIPH_817	Acinetobacter_oleivorans_DR1	95.5272	Acinetobacter oleivorans
Acinetobacter_oleivorans_TUM15416	Acinetobacter_oleivorans_DR1	95.5308	Acinetobacter oleivorans
Acinetobacter_pittii_KCJK7889	Acinetobacter_pittii_ATCC_19004	95.5611	Acinetobacter pittii
Acinetobacter_pittii_LC510	Acinetobacter_pittii_ATCC_19004	95.562	Acinetobacter pittii
Acinetobacter_johnsonii_UCO-489	Acinetobacter_johnsonii_DSM_6963	95.5949	Acinetobacter johnsonii
Acinetobacter_johnsonii_AJ_385	Acinetobacter_johnsonii_CIP_64.6	95.619	Acinetobacter johnsonii
Acinetobacter_oleivorans_TUM15548	Acinetobacter_oleivorans_DR1	95.6202	Acinetobacter oleivorans
Acinetobacter_sp._CWB-G5	Acinetobacter_johnsonii_DSM_6963	95.634	Acinetobacter johnsonii
uncultured_Acinetobacter_sp._SRR5976596_bin.17_MetaBAT_v2.12.1_MAG	Acinetobacter_oleivorans_DR1	95.6565	Acinetobacter oleivorans
Acinetobacter_johnsonii_XBB1	Acinetobacter_johnsonii_CIP_64.6	95.6811	Acinetobacter johnsonii
Acinetobacter_johnsonii_CSUSB1	Acinetobacter_johnsonii_DSM_6963	95.6838	Acinetobacter johnsonii
Acinetobacter_sp._KU_011TH	Acinetobacter_pittii_ATCC_19004	95.6857	Acinetobacter pittii
Acinetobacter_sp._SwsAc7	Acinetobacter_johnsonii_DSM_6963	95.6898	Acinetobacter johnsonii
Acinetobacter_sp._KU_013TH	Acinetobacter_pittii_ATCC_19004	95.699	Acinetobacter pittii
Acinetobacter_johnsonii_B23	Acinetobacter_johnsonii_DSM_6963	95.7003	Acinetobacter johnsonii
Acinetobacter_johnsonii_WCHAJo010049	Acinetobacter_johnsonii_DSM_6963	95.7113	Acinetobacter johnsonii
Acinetobacter_sp._ANC_4177	Acinetobacter_bouvetii_CIP_107468	95.7157	Acinetobacter bouvetii
Acinetobacter_johnsonii_Acsw19	Acinetobacter_johnsonii_CIP_64.6	95.7194	Acinetobacter johnsonii
Acinetobacter_sp._SwsAc3	Acinetobacter_johnsonii_DSM_6963	95.7295	Acinetobacter johnsonii
Acinetobacter_bouvetii_WCHABo060081	Acinetobacter_bouvetii_CIP_107468	95.754	Acinetobacter bouvetii
Acinetobacter_johnsonii_18QD2AZ57W	Acinetobacter_johnsonii_DSM_6963	95.7701	Acinetobacter johnsonii
Acinetobacter_bohemicus_ANC_5076	Acinetobacter_bohemicus_ANC_3994	95.771	Acinetobacter bohemicus
Acinetobacter_johnsonii_AJ_082	Acinetobacter_johnsonii_CIP_64.6	95.7843	Acinetobacter johnsonii
Acinetobacter_bohemicus_CCUG_69707	Acinetobacter_bohemicus_ANC_3994	95.7845	Acinetobacter bohemicus
Acinetobacter_johnsonii_LXL_C1	Acinetobacter_johnsonii_CIP_64.6	95.79	Acinetobacter johnsonii
Acinetobacter_johnsonii_XY27	Acinetobacter_johnsonii_DSM_6963	95.7952	Acinetobacter johnsonii
Acinetobacter_johnsonii_AJ01M	Acinetobacter_johnsonii_DSM_6963	95.8073	Acinetobacter johnsonii
Acinetobacter_sp._8I-beige	Acinetobacter_johnsonii_CIP_64.6	95.8092	Acinetobacter johnsonii
Acinetobacter_lwoffii_UBA1649	Acinetobacter_lwoffii_CIP_64.10	95.8199	Acinetobacter lwoffii
Acinetobacter_johnsonii_FDAARGOS_1092	Acinetobacter_johnsonii_CIP_64.6	95.8277	Acinetobacter johnsonii
Acinetobacter_sp._BMW17	Acinetobacter_johnsonii_DSM_6963	95.8518	Acinetobacter johnsonii
Acinetobacter_calcoaceticus_CC170	Acinetobacter_calcoaceticus_DSM_30006	95.8715	Acinetobacter calcoaceticus
Acinetobacter_johnsonii_C6	Acinetobacter_johnsonii_DSM_6963	95.8776	Acinetobacter johnsonii
Acinetobacter_johnsonii_ANC_3681	Acinetobacter_johnsonii_CIP_64.6	95.8841	Acinetobacter johnsonii
Acinetobacter_pittii_2010C01-170	Acinetobacter_pittii_ATCC_19004	95.8931	Acinetobacter pittii
Acinetobacter_johnsonii_M19	Acinetobacter_johnsonii_CIP_64.6	95.8959	Acinetobacter johnsonii
Acinetobacter_johnsonii_MB44	Acinetobacter_johnsonii_CIP_64.6	95.9035	Acinetobacter johnsonii
Acinetobacter_johnsonii_JH7	Acinetobacter_johnsonii_DSM_6963	95.9047	Acinetobacter johnsonii
Acinetobacter_pittii_2012N08-034	Acinetobacter_pittii_ATCC_19004	95.9081	Acinetobacter pittii
Acinetobacter_johnsonii_Aj2199	Acinetobacter_johnsonii_DSM_6963	95.9141	Acinetobacter johnsonii
Acinetobacter_pittii_Aci00901	Acinetobacter_pittii_ATCC_19004	95.9233	Acinetobacter pittii
Acinetobacter_sp._NEB_394	Acinetobacter_johnsonii_CIP_64.6	95.9244	Acinetobacter johnsonii
Acinetobacter_johnsonii_FDAARGOS_1094	Acinetobacter_johnsonii_CIP_64.6	95.9248	Acinetobacter johnsonii
Acinetobacter_johnsonii_IC001	Acinetobacter_johnsonii_CIP_64.6	95.9335	Acinetobacter johnsonii
Acinetobacter_sp._yr461_YR461	Acinetobacter_calcoaceticus_DSM_30006	95.9465	Acinetobacter calcoaceticus
Acinetobacter_sp._SwsAc2	Acinetobacter_johnsonii_DSM_6963	95.9507	Acinetobacter johnsonii
Acinetobacter_johnsonii_FDAARGOS_1093	Acinetobacter_johnsonii_CIP_64.6	95.9579	Acinetobacter johnsonii
Acinetobacter_sp._YH16052	Acinetobacter_lwoffii_CIP_64.10	95.967	Acinetobacter lwoffii
Acinetobacter_johnsonii_MR1	Acinetobacter_bouvetii_DSM_14964	95.9671	Acinetobacter bouvetii
Acinetobacter_lwoffii_12CE1	Acinetobacter_lwoffii_CIP_64.10	95.9763	Acinetobacter lwoffii
Acinetobacter_pittii_Survcare344	Acinetobacter_pittii_ATCC_19004	95.9894	Acinetobacter pittii
Acinetobacter_calcoaceticus_E1	Acinetobacter_calcoaceticus_DSM_30006	95.9978	Acinetobacter calcoaceticus
Acinetobacter_johnsonii_UBA11272	Acinetobacter_johnsonii_DSM_6963	96.0008	Acinetobacter johnsonii
Acinetobacter_johnsonii_S00116	Acinetobacter_johnsonii_DSM_6963	96.0014	Acinetobacter johnsonii
Acinetobacter_calcoaceticus_ACIN00262	Acinetobacter_calcoaceticus_DSM_30006	96.0061	Acinetobacter calcoaceticus
Acinetobacter_lwoffii_H7	Acinetobacter_lwoffii_CIP_64.10	96.0066	Acinetobacter lwoffii
Acinetobacter_johnsonii_E10B	Acinetobacter_johnsonii_CIP_64.6	96.0096	Acinetobacter johnsonii
Acinetobacter_pittii_UKK-0520	Acinetobacter_pittii_ATCC_19004	96.01	Acinetobacter pittii
Acinetobacter_calcoaceticus_TUM15316	Acinetobacter_calcoaceticus_CIP_81.8	96.0112	Acinetobacter calcoaceticus
Acinetobacter_sp._YH12226	Acinetobacter_lwoffii_CIP_64.10	96.0209	Acinetobacter lwoffii
Acinetobacter_sp._MF4640	Acinetobacter_johnsonii_DSM_6963	96.0335	Acinetobacter johnsonii
Acinetobacter_lwoffii_UBA2051	Acinetobacter_lwoffii_CIP_64.10	96.0497	Acinetobacter lwoffii
Acinetobacter_calcoaceticus_TUM15122	Acinetobacter_calcoaceticus_CIP_81.8	96.0517	Acinetobacter calcoaceticus
Acinetobacter_sp._BHS4	Acinetobacter_pittii_ATCC_19004	96.0528	Acinetobacter pittii
Acinetobacter_sp._AR2-3	Acinetobacter_lwoffii_CIP_64.10	96.0744	Acinetobacter lwoffii
Acinetobacter_pittii_WCHAP100012	Acinetobacter_pittii_DSM_25618	96.0767	Acinetobacter pittii
Acinetobacter_johnsonii_SH046	Acinetobacter_johnsonii_DSM_6963	96.0844	Acinetobacter johnsonii
Acinetobacter_tandoii_SC36	Acinetobacter_kanungonis_PS-1	96.1022	Acinetobacter kanungonis
Acinetobacter_terrae_ANC_4277	Acinetobacter_terrae_ANC_4282	96.1232	Acinetobacter terrae
Acinetobacter_johnsonii_UBA2045	Acinetobacter_johnsonii_CIP_64.6	96.1311	Acinetobacter johnsonii
Acinetobacter_lwoffii_GC2	Acinetobacter_lwoffii_CIP_64.10	96.1381	Acinetobacter lwoffii
Acinetobacter_lwoffii_TG19636	Acinetobacter_lwoffii_CIP_64.10	96.1586	Acinetobacter lwoffii
Acinetobacter_tandoii_SE63	Acinetobacter_kanungonis_PS-1	96.165	Acinetobacter kanungonis
Acinetobacter_junii_ZM06	Acinetobacter_kanungonis_PS-1	96.171	Acinetobacter kanungonis
Acinetobacter_sp._MF4642	Acinetobacter_johnsonii_DSM_6963	96.1758	Acinetobacter johnsonii
Acinetobacter_sp._CIP_51.11	Acinetobacter_lwoffii_CIP_64.10	96.1788	Acinetobacter lwoffii
Acinetobacter_lwoffii_NIPH_478	Acinetobacter_lwoffii_CIP_64.10	96.1858	Acinetobacter lwoffii
Acinetobacter_sp._YH01021	Acinetobacter_lwoffii_CIP_64.10	96.1938	Acinetobacter lwoffii
Acinetobacter_sp._CIP_64.7	Acinetobacter_lwoffii_CIP_64.10	96.1947	Acinetobacter lwoffii
Acinetobacter_sp._C13	Acinetobacter_pittii_ATCC_19004	96.2013	Acinetobacter pittii
Acinetobacter_pittii_32292	Acinetobacter_pittii_ATCC_19004	96.2208	Acinetobacter pittii
Acinetobacter_sp._c1_C1	Acinetobacter_pittii_ATCC_19004	96.2245	Acinetobacter pittii
Acinetobacter_brisouii_SM1	Acinetobacter_brisouii_CIP_110357	96.228	Acinetobacter brisouii
Acinetobacter_lwoffii_EK30A	Acinetobacter_lwoffii_CIP_64.10	96.2331	Acinetobacter lwoffii
Acinetobacter_sp._CIP_102136	Acinetobacter_lwoffii_CIP_64.10	96.2369	Acinetobacter lwoffii
Acinetobacter_terrestris_NIPH_2377	Acinetobacter_terrestris_ANC_4471	96.2391	Acinetobacter terrestris
Acinetobacter_lwoffii_FDAARGOS_620	Acinetobacter_lwoffii_CIP_64.10	96.247	Acinetobacter lwoffii
Acinetobacter_pittii_JXA13	Acinetobacter_pittii_ATCC_19004	96.2561	Acinetobacter pittii
Acinetobacter_lwoffii_SU1904	Acinetobacter_lwoffii_CIP_64.10	96.2638	Acinetobacter lwoffii
Acinetobacter_lwoffii_ATCC_9957__CIP_70.31	Acinetobacter_lwoffii_CIP_64.10	96.2649	Acinetobacter lwoffii
Acinetobacter_variabilis_AV_175	Acinetobacter_variabilis_NIPH_2171	96.2727	Acinetobacter variabilis
Acinetobacter_venetianus_LUH13518	Acinetobacter_venetianus_RAG-1	96.2772	Acinetobacter venetianus
Acinetobacter_guillouiae_CC160	Acinetobacter_guillouiae_CCUG_2491	96.2893	Acinetobacter guillouiae
Acinetobacter_sp._WY4	Acinetobacter_lwoffii_CIP_64.10	96.2899	Acinetobacter lwoffii
Acinetobacter_pittii_IEC338SC	Acinetobacter_pittii_ATCC_19004	96.2915	Acinetobacter pittii
Acinetobacter_pittii_MCR53	Acinetobacter_pittii_ATCC_19004	96.2964	Acinetobacter pittii
Acinetobacter_pittii_Aci00905	Acinetobacter_pittii_ATCC_19004	96.3029	Acinetobacter pittii
Acinetobacter_sp._826659	Acinetobacter_pittii_ATCC_19004	96.3037	Acinetobacter pittii
Acinetobacter_lwoffii_FDAARGOS_557	Acinetobacter_lwoffii_CIP_64.10	96.3052	Acinetobacter lwoffii
Acinetobacter_calcoaceticus_ANC_3680	Acinetobacter_calcoaceticus_CIP_81.8	96.3217	Acinetobacter calcoaceticus
Acinetobacter_sp._CIP_101966	Acinetobacter_lwoffii_CIP_64.10	96.3253	Acinetobacter lwoffii
Acinetobacter_sp._LMB-5	Acinetobacter_pittii_ATCC_19004	96.3255	Acinetobacter pittii
Acinetobacter_terrestris_ANC_4472	Acinetobacter_terrestris_ANC_4471	96.3275	Acinetobacter terrestris
Acinetobacter_sp._Leaf130	Acinetobacter_calcoaceticus_DSM_30006	96.3278	Acinetobacter calcoaceticus
Acinetobacter_pittii_TCM178	Acinetobacter_pittii_ATCC_19004	96.3297	Acinetobacter pittii
Acinetobacter_lwoffii_SH145	Acinetobacter_lwoffii_CIP_64.10	96.3302	Acinetobacter lwoffii
Acinetobacter_calcoaceticus_TG19593	Acinetobacter_calcoaceticus_DSM_30006	96.3342	Acinetobacter calcoaceticus
Acinetobacter_sp._NEB149	Acinetobacter_lwoffii_CIP_64.10	96.3348	Acinetobacter lwoffii
Acinetobacter_pittii_AC1640	Acinetobacter_pittii_ATCC_19004	96.3424	Acinetobacter pittii
Acinetobacter_calcoaceticus_OVA10B	Acinetobacter_calcoaceticus_DSM_30006	96.3648	Acinetobacter calcoaceticus
Acinetobacter_baumannii_DE0058	Acinetobacter_courvalinii_CCM_8635	96.3734	Acinetobacter courvalinii
Acinetobacter_pittii_ARLG1942	Acinetobacter_pittii_DSM_25618	96.3756	Acinetobacter pittii
Acinetobacter_lwoffii_S00127	Acinetobacter_lwoffii_CIP_64.10	96.3798	Acinetobacter lwoffii
Acinetobacter_guillouiae_TUM15313	Acinetobacter_guillouiae_CCUG_2491	96.3804	Acinetobacter guillouiae
Acinetobacter_lwoffii_FDAARGOS_551	Acinetobacter_lwoffii_CIP_64.10	96.3817	Acinetobacter lwoffii
Acinetobacter_lwoffii_FDAARGOS_1394	Acinetobacter_lwoffii_CIP_64.10	96.3825	Acinetobacter lwoffii
Acinetobacter_guillouiae_NBRC_110550	Acinetobacter_guillouiae_CCUG_2491	96.385	Acinetobacter guillouiae
Acinetobacter_calcoaceticus_FDAARGOS_1218	Acinetobacter_calcoaceticus_DSM_30006	96.3891	Acinetobacter calcoaceticus
Acinetobacter_lwoffii_MGYG-HGUT-00082	Acinetobacter_lwoffii_CIP_64.10	96.3904	Acinetobacter lwoffii
Acinetobacter_terrae_ANC_5380	Acinetobacter_terrae_ANC_4282	96.3999	Acinetobacter terrae
Acinetobacter_pittii_NBRC_110514	Acinetobacter_pittii_ATCC_19004	96.4002	Acinetobacter pittii
Acinetobacter_pittii_T167	Acinetobacter_pittii_ATCC_19004	96.4017	Acinetobacter pittii
Acinetobacter_calcoaceticus_P23	Acinetobacter_calcoaceticus_DSM_30006	96.4054	Acinetobacter calcoaceticus
Acinetobacter_sp._WC-323	Acinetobacter_courvalinii_CCM_8635	96.4109	Acinetobacter courvalinii
Acinetobacter_terrestris_ANC_5084	Acinetobacter_terrestris_ANC_4471	96.4142	Acinetobacter terrestris
Acinetobacter_pittii_AP007	Acinetobacter_pittii_ATCC_19004	96.4145	Acinetobacter pittii
Acinetobacter_sp._ETR1	Acinetobacter_guillouiae_CCUG_2491	96.4166	Acinetobacter guillouiae
Acinetobacter_calcoaceticus_EGD_AQ_BF14	Acinetobacter_pittii_ATCC_19004	96.4171	Acinetobacter pittii
Acinetobacter_pittii_AC1525	Acinetobacter_pittii_ATCC_19004	96.4221	Acinetobacter pittii
Acinetobacter_pittii_A1254	Acinetobacter_pittii_ATCC_19004	96.4229	Acinetobacter pittii
Acinetobacter_pittii_UKK-0546	Acinetobacter_pittii_ATCC_19004	96.4281	Acinetobacter pittii
Acinetobacter_lwoffii_FDAARGOS_552	Acinetobacter_lwoffii_CIP_64.10	96.4323	Acinetobacter lwoffii
Acinetobacter_pittii_AC1555	Acinetobacter_pittii_ATCC_19004	96.4354	Acinetobacter pittii
Acinetobacter_lwoffii_AMA23	Acinetobacter_lwoffii_CIP_64.10	96.4424	Acinetobacter lwoffii
Acinetobacter_lwoffii_NIPH_715	Acinetobacter_lwoffii_CIP_64.10	96.4438	Acinetobacter lwoffii
Acinetobacter_sp._51m	Acinetobacter_lwoffii_CIP_64.10	96.4443	Acinetobacter lwoffii
Acinetobacter_pittii_ACIN00192	Acinetobacter_pittii_ATCC_19004	96.4475	Acinetobacter pittii
Acinetobacter_pittii_WCHAP100016	Acinetobacter_pittii_DSM_25618	96.4482	Acinetobacter pittii
Acinetobacter_pittii_XJ88	Acinetobacter_pittii_ATCC_19004	96.4523	Acinetobacter pittii
Acinetobacter_lwoffii_ZS207	Acinetobacter_lwoffii_CIP_64.10	96.469	Acinetobacter lwoffii
Acinetobacter_guillouiae_NIPH_991	Acinetobacter_guillouiae_CIP_63.46	96.4691	Acinetobacter guillouiae
Acinetobacter_seifertii_AS70	Acinetobacter_seifertii_NIPH_973	96.4747	Acinetobacter seifertii
Acinetobacter_oleivorans_HW32	Acinetobacter_oleivorans_KCTC_23045	96.4757	Acinetobacter oleivorans
Acinetobacter_pittii_Aci00748	Acinetobacter_pittii_ATCC_19004	96.4832	Acinetobacter pittii
Acinetobacter_pittii_AB17H194	Acinetobacter_pittii_ATCC_19004	96.4902	Acinetobacter pittii
Acinetobacter_pittii_VNMU_150	Acinetobacter_pittii_ATCC_19004	96.4921	Acinetobacter pittii
Acinetobacter_pittii_UKK-0145	Acinetobacter_pittii_ATCC_19004	96.5066	Acinetobacter pittii
Acinetobacter_lactucae_TG29425	Acinetobacter_lactucae_NRRL_B-41902	96.5398	Acinetobacter lactucae
Acinetobacter_seifertii_TUM15118	Acinetobacter_seifertii_NIPH_973	96.5447	Acinetobacter seifertii
Acinetobacter_pittii_WCHAP100021	Acinetobacter_pittii_ATCC_19004	96.5497	Acinetobacter pittii
Acinetobacter_sp._NIPH_899	Acinetobacter_variabilis_NIPH_2171	96.5499	Acinetobacter variabilis
Acinetobacter_indicus_KCTC_42012	Acinetobacter_indicus_CIP_110367	96.5585	Acinetobacter indicus
Acinetobacter_pittii_ACIN00188	Acinetobacter_geminorum_J00019	96.5586	Acinetobacter geminorum
Acinetobacter_seifertii_AS73	Acinetobacter_seifertii_NIPH_973	96.5592	Acinetobacter seifertii
Acinetobacter_sp._742879	Acinetobacter_pittii_ATCC_19004	96.5655	Acinetobacter pittii
Acinetobacter_seifertii_TUM15021	Acinetobacter_seifertii_NIPH_973	96.5656	Acinetobacter seifertii
Acinetobacter_pittii_ACIN00239	Acinetobacter_pittii_ATCC_19004	96.5687	Acinetobacter pittii
Acinetobacter_pittii_ABBL019	Acinetobacter_pittii_ATCC_19004	96.5697	Acinetobacter pittii
Acinetobacter_pittii_KCJK1729	Acinetobacter_pittii_ATCC_19004	96.5734	Acinetobacter pittii
Acinetobacter_pittii_ARLG1865	Acinetobacter_pittii_ATCC_19004	96.5801	Acinetobacter pittii
Acinetobacter_pittii_AC1566	Acinetobacter_pittii_ATCC_19004	96.5937	Acinetobacter pittii
Acinetobacter_baumannii_269	Acinetobacter_pittii_ATCC_19004	96.5955	Acinetobacter pittii
Acinetobacter_terrae_ANC_4279	Acinetobacter_terrae_ANC_4282	96.599	Acinetobacter terrae
Acinetobacter_pittii_AC1597	Acinetobacter_pittii_ATCC_19004	96.6014	Acinetobacter pittii
Acinetobacter_pittii_WCHAP100003	Acinetobacter_pittii_ATCC_19004	96.6021	Acinetobacter pittii
Acinetobacter_sp._1542444	Acinetobacter_pittii_DSM_25618	96.6079	Acinetobacter pittii
Acinetobacter_lwoffii_VS15	Acinetobacter_lwoffii_CIP_64.10	96.6111	Acinetobacter lwoffii
Acinetobacter_pittii_UBA4954	Acinetobacter_geminorum_J00019	96.6172	Acinetobacter geminorum
Acinetobacter_pittii_ABC	Acinetobacter_pittii_ATCC_19004	96.6214	Acinetobacter pittii
Acinetobacter_pittii_WCHAP100001	Acinetobacter_pittii_ATCC_19004	96.6249	Acinetobacter pittii
Acinetobacter_baumannii_146457	Acinetobacter_courvalinii_CCUG_67960	96.6315	Acinetobacter courvalinii
Acinetobacter_sp._V2	Acinetobacter_oleivorans_DR1	96.6327	Acinetobacter oleivorans
Acinetobacter_pittii_PHEA-2	Acinetobacter_pittii_ATCC_19004	96.633	Acinetobacter pittii
Acinetobacter_pittii_YMC2010_8_T346	Acinetobacter_pittii_ATCC_19004	96.6334	Acinetobacter pittii
Acinetobacter_pittii_AC1822	Acinetobacter_pittii_ATCC_19004	96.6344	Acinetobacter pittii
Acinetobacter_venetianus_WCHAV010037	Acinetobacter_venetianus_RAG-1	96.6378	Acinetobacter venetianus
Acinetobacter_pittii_TG22174	Acinetobacter_pittii_ATCC_19004	96.6432	Acinetobacter pittii
Acinetobacter_indicus_SGAir0564	Acinetobacter_indicus_CIP_110367	96.6487	Acinetobacter indicus
Acinetobacter_seifertii_TUM15357	Acinetobacter_seifertii_NIPH_973	96.6497	Acinetobacter seifertii
Acinetobacter_oleivorans_AC1583	Acinetobacter_oleivorans_KCTC_23045	96.658	Acinetobacter oleivorans
Acinetobacter_colistiniresistens_NIPH_1859	Acinetobacter_colistiniresistens_NIPH_2036	96.6612	Acinetobacter colistiniresistens
Acinetobacter_seifertii_KCJK7915	Acinetobacter_seifertii_NIPH_973	96.6618	Acinetobacter seifertii
Acinetobacter_indicus_KM7	Acinetobacter_indicus_CIP_110367	96.6625	Acinetobacter indicus
Acinetobacter_pittii_NBRC_110504	Acinetobacter_pittii_ATCC_19004	96.6704	Acinetobacter pittii
Acinetobacter_sp._NIPH_1847	Acinetobacter_courvalinii_CCM_8635	96.6729	Acinetobacter courvalinii
Acinetobacter_pittii_ACIN00238	Acinetobacter_geminorum_J00019	96.6775	Acinetobacter geminorum
Acinetobacter_sp._1000160	Acinetobacter_courvalinii_CCM_8635	96.6792	Acinetobacter courvalinii
Acinetobacter_seifertii_Ase176	Acinetobacter_seifertii_NIPH_973	96.6795	Acinetobacter seifertii
Acinetobacter_pittii_AP_882	Acinetobacter_pittii_ATCC_19004	96.6819	Acinetobacter pittii
Acinetobacter_venetianus_VE-C3	Acinetobacter_venetianus_RAG-1	96.6867	Acinetobacter venetianus
Acinetobacter_parvus_CM11	Acinetobacter_modestus_CCM_8639	96.6902	Acinetobacter modestus
Acinetobacter_sp._AC1-2	Acinetobacter_calcoaceticus_DSM_30006	96.6955	Acinetobacter calcoaceticus
Acinetobacter_pittii_FDAARGOS_1216	Acinetobacter_pittii_DSM_25618	96.7022	Acinetobacter pittii
Acinetobacter_oleivorans_KCRI-35	Acinetobacter_oleivorans_DR1	96.7065	Acinetobacter oleivorans
Acinetobacter_wuhouensis_WCHAW010062	Acinetobacter_wuhouensis_WCHA60	96.7069	Acinetobacter wuhouensis
Acinetobacter_pittii_CR12-42	Acinetobacter_pittii_ATCC_19004	96.7075	Acinetobacter pittii
Acinetobacter_seifertii_TUM15285	Acinetobacter_seifertii_NIPH_973	96.7082	Acinetobacter seifertii
Acinetobacter_sp._VT_511	Acinetobacter_schindleri_CIP_107287	96.7107	Acinetobacter schindleri
Acinetobacter_pittii_NBRC_110507	Acinetobacter_pittii_ATCC_19004	96.7127	Acinetobacter pittii
Acinetobacter_pittii_OCU_Ac5	Acinetobacter_pittii_ATCC_19004	96.713	Acinetobacter pittii
Acinetobacter_sp._ACNIH3	Acinetobacter_schindleri_CIP_107287	96.7153	Acinetobacter schindleri
Acinetobacter_pittii_SCsl25	Acinetobacter_pittii_ATCC_19004	96.7156	Acinetobacter pittii
Acinetobacter_seifertii_TUM15515	Acinetobacter_seifertii_NIPH_973	96.7158	Acinetobacter seifertii
Acinetobacter_sp._WCHAc060033	Acinetobacter_wuhouensis_WCHA60	96.7207	Acinetobacter wuhouensis
Acinetobacter_lactucae_TUM15140	Acinetobacter_lactucae_NRRL_B-41902	96.7217	Acinetobacter lactucae
Acinetobacter_courvalinii_ACIN00158	Acinetobacter_courvalinii_CCUG_67960	96.7221	Acinetobacter courvalinii
Acinetobacter_seifertii_AS6	Acinetobacter_seifertii_NIPH_973	96.7266	Acinetobacter seifertii
Acinetobacter_pittii_TCM156	Acinetobacter_pittii_ATCC_19004	96.73	Acinetobacter pittii
Acinetobacter_seifertii_ACIN00148	Acinetobacter_seifertii_NIPH_973	96.7305	Acinetobacter seifertii
Acinetobacter_seifertii_TUM15427	Acinetobacter_seifertii_NIPH_973	96.7321	Acinetobacter seifertii
Acinetobacter_pittii_NBRC_110509	Acinetobacter_pittii_ATCC_19004	96.7332	Acinetobacter pittii
Acinetobacter_pittii_PR320	Acinetobacter_pittii_DSM_25618	96.7364	Acinetobacter pittii
Acinetobacter_baumannii_Ab56	Acinetobacter_baumannii_DSM_30007	96.7376	Acinetobacter baumannii
Acinetobacter_sp._aerobic_ED__Aci00763	Acinetobacter_courvalinii_CCUG_67960	96.7406	Acinetobacter courvalinii
Acinetobacter_baumannii_1437282	Acinetobacter_courvalinii_CCM_8635	96.7444	Acinetobacter courvalinii
Acinetobacter_oleivorans_KCJK7897	Acinetobacter_oleivorans_DR1	96.748	Acinetobacter oleivorans
Acinetobacter_seifertii_SAb133	Acinetobacter_seifertii_NIPH_973	96.7486	Acinetobacter seifertii
Acinetobacter_baumannii_PBIO721	Acinetobacter_oleivorans_DR1	96.7507	Acinetobacter oleivorans
Acinetobacter_terrae_ANC_4280	Acinetobacter_terrae_ANC_4282	96.7526	Acinetobacter terrae
Acinetobacter_pittii_PR348	Acinetobacter_pittii_DSM_25618	96.7526	Acinetobacter pittii
Acinetobacter_genomosp._33YU_A362	Acinetobacter_seifertii_NIPH_973	96.757	Acinetobacter seifertii
Acinetobacter_courvalinii_ACIN00250	Acinetobacter_courvalinii_CCM_8635	96.7572	Acinetobacter courvalinii
Acinetobacter_pittii_YMC2009_2_B2968	Acinetobacter_pittii_DSM_25618	96.7616	Acinetobacter pittii
Acinetobacter_pittii_AC1649	Acinetobacter_pittii_ATCC_19004	96.7638	Acinetobacter pittii
Acinetobacter_pittii_PR366	Acinetobacter_geminorum_J00019	96.7692	Acinetobacter geminorum
Acinetobacter_seifertii_AS4	Acinetobacter_seifertii_NIPH_973	96.7693	Acinetobacter seifertii
Acinetobacter_pittii_TG41884	Acinetobacter_pittii_DSM_25618	96.7703	Acinetobacter pittii
Acinetobacter_sp._ZOR0008	Acinetobacter_pittii_DSM_25618	96.7711	Acinetobacter pittii
Acinetobacter_sp._ACNIH4	Acinetobacter_schindleri_CIP_107287	96.7712	Acinetobacter schindleri
Acinetobacter_pittii_HU_AC	Acinetobacter_pittii_DSM_25618	96.7718	Acinetobacter pittii
Acinetobacter_indicus_WMB-7	Acinetobacter_indicus_CIP_110367	96.7725	Acinetobacter indicus
Acinetobacter_pittii_WCHAP100014	Acinetobacter_pittii_DSM_25618	96.7766	Acinetobacter pittii
Acinetobacter_pittii_TG31972	Acinetobacter_pittii_DSM_25618	96.7803	Acinetobacter pittii
Acinetobacter_pittii_TG41243	Acinetobacter_pittii_DSM_25618	96.7824	Acinetobacter pittii
Acinetobacter_pittii_TE2	Acinetobacter_pittii_ATCC_19004	96.7856	Acinetobacter pittii
Acinetobacter_pittii_UKK-0432	Acinetobacter_pittii_ATCC_19004	96.789	Acinetobacter pittii
Acinetobacter_sp._1295259	Acinetobacter_pittii_DSM_25618	96.7901	Acinetobacter pittii
Acinetobacter_pittii_ABBL015	Acinetobacter_pittii_DSM_25618	96.7939	Acinetobacter pittii
Acinetobacter_parvus_NIPH_1103	Acinetobacter_parvus_DSM_16617	96.7941	Acinetobacter parvus
Acinetobacter_seifertii_TUM15279	Acinetobacter_seifertii_NIPH_973	96.7948	Acinetobacter seifertii
Acinetobacter_wuhouensis_WCHAW060023	Acinetobacter_wuhouensis_WCHA60	96.7949	Acinetobacter wuhouensis
Acinetobacter_pittii_IPK_TSA6.1	Acinetobacter_pittii_ATCC_19004	96.8019	Acinetobacter pittii
Acinetobacter_seifertii_AS62	Acinetobacter_seifertii_NIPH_973	96.8051	Acinetobacter seifertii
Acinetobacter_sp._WCHAc060025	Acinetobacter_wuhouensis_WCHA60	96.8078	Acinetobacter wuhouensis
Acinetobacter_seifertii_AS34	Acinetobacter_seifertii_NIPH_973	96.8086	Acinetobacter seifertii
Acinetobacter_pittii_WP2-W18-ESBL-11	Acinetobacter_pittii_ATCC_19004	96.8095	Acinetobacter pittii
Acinetobacter_pittii_TG41012	Acinetobacter_pittii_DSM_25618	96.8122	Acinetobacter pittii
Acinetobacter_seifertii_AS59	Acinetobacter_seifertii_NIPH_973	96.8138	Acinetobacter seifertii
Acinetobacter_schindleri_ACE	Acinetobacter_schindleri_CIP_107287	96.8175	Acinetobacter schindleri
Acinetobacter_pittii_TUM16165	Acinetobacter_pittii_DSM_25618	96.8177	Acinetobacter pittii
Acinetobacter_pittii_ST220	Acinetobacter_pittii_ATCC_19004	96.8207	Acinetobacter pittii
Acinetobacter_seifertii_AS80	Acinetobacter_seifertii_NIPH_973	96.8251	Acinetobacter seifertii
Acinetobacter_seifertii_AS58	Acinetobacter_seifertii_NIPH_973	96.8278	Acinetobacter seifertii
Acinetobacter_seifertii_AS61	Acinetobacter_seifertii_NIPH_973	96.831	Acinetobacter seifertii
Acinetobacter_sp._TG2027	Acinetobacter_pittii_DSM_25618	96.8347	Acinetobacter pittii
Acinetobacter_oleivorans_ACIN00177	Acinetobacter_oleivorans_KCTC_23045	96.8368	Acinetobacter oleivorans
Acinetobacter_pittii_TG29422	Acinetobacter_pittii_DSM_25618	96.8378	Acinetobacter pittii
Acinetobacter_pittii_HUMV-6483	Acinetobacter_pittii_DSM_25618	96.839	Acinetobacter pittii
Acinetobacter_seifertii_AS78	Acinetobacter_seifertii_NIPH_973	96.8429	Acinetobacter seifertii
Acinetobacter_seifertii_AS25	Acinetobacter_seifertii_NIPH_973	96.8441	Acinetobacter seifertii
Acinetobacter_pittii_ARLG1807	Acinetobacter_pittii_ATCC_19004	96.8466	Acinetobacter pittii
Acinetobacter_pittii_XM1570	Acinetobacter_pittii_DSM_25618	96.8472	Acinetobacter pittii
Acinetobacter_seifertii_AS51	Acinetobacter_seifertii_NIPH_973	96.8499	Acinetobacter seifertii
Acinetobacter_pittii_TG91944	Acinetobacter_pittii_DSM_25618	96.8513	Acinetobacter pittii
Acinetobacter_seifertii_AS49	Acinetobacter_seifertii_NIPH_973	96.8514	Acinetobacter seifertii
Acinetobacter_seifertii_S21	Acinetobacter_seifertii_NIPH_973	96.8533	Acinetobacter seifertii
Acinetobacter_pittii_WCHAP100002	Acinetobacter_pittii_DSM_25618	96.8537	Acinetobacter pittii
Acinetobacter_seifertii_AS63	Acinetobacter_seifertii_NIPH_973	96.8572	Acinetobacter seifertii
Acinetobacter_pittii_ACIN00255	Acinetobacter_pittii_ATCC_19004	96.8593	Acinetobacter pittii
Acinetobacter_seifertii_TUM15226	Acinetobacter_seifertii_NIPH_973	96.8593	Acinetobacter seifertii
Acinetobacter_pittii_UBA2484	Acinetobacter_pittii_DSM_25618	96.8595	Acinetobacter pittii
Acinetobacter_seifertii_AS47	Acinetobacter_seifertii_NIPH_973	96.8597	Acinetobacter seifertii
Acinetobacter_seifertii_AS31	Acinetobacter_seifertii_NIPH_973	96.8601	Acinetobacter seifertii
Acinetobacter_seifertii_AS42	Acinetobacter_seifertii_NIPH_973	96.8629	Acinetobacter seifertii
Acinetobacter_seifertii_AS71	Acinetobacter_seifertii_NIPH_973	96.8655	Acinetobacter seifertii
Acinetobacter_schindleri_DRN	Acinetobacter_schindleri_CIP_107287	96.867	Acinetobacter schindleri
Acinetobacter_genomosp._33YU_A354	Acinetobacter_seifertii_NIPH_973	96.8726	Acinetobacter seifertii
Acinetobacter_sp._TG27347	Acinetobacter_pittii_DSM_25618	96.8785	Acinetobacter pittii
Acinetobacter_pittii_St-19650-90	Acinetobacter_pittii_ATCC_19004	96.8849	Acinetobacter pittii
Acinetobacter_terrae_ANC_4655	Acinetobacter_terrae_ANC_4282	96.8864	Acinetobacter terrae
Acinetobacter_sp._GG2	Acinetobacter_seifertii_NIPH_973	96.8865	Acinetobacter seifertii
Acinetobacter_seifertii_AS41	Acinetobacter_seifertii_NIPH_973	96.888	Acinetobacter seifertii
Acinetobacter_seifertii_AS33	Acinetobacter_seifertii_NIPH_973	96.8881	Acinetobacter seifertii
Acinetobacter_sp._AG1	Acinetobacter_modestus_CCM_8639	96.8882	Acinetobacter modestus
Acinetobacter_pittii_ACIN00256	Acinetobacter_pittii_ATCC_19004	96.8884	Acinetobacter pittii
Acinetobacter_seifertii_AS40	Acinetobacter_seifertii_NIPH_973	96.8904	Acinetobacter seifertii
Acinetobacter_seifertii_AS11	Acinetobacter_seifertii_NIPH_973	96.8905	Acinetobacter seifertii
Acinetobacter_pittii_DE0091	Acinetobacter_pittii_DSM_25618	96.8936	Acinetobacter pittii
Acinetobacter_seifertii_AS72	Acinetobacter_seifertii_NIPH_973	96.8951	Acinetobacter seifertii
Acinetobacter_pittii_FC8876	Acinetobacter_pittii_DSM_25618	96.8959	Acinetobacter pittii
Acinetobacter_seifertii_AS24	Acinetobacter_seifertii_NIPH_973	96.8967	Acinetobacter seifertii
Acinetobacter_seifertii_AS52	Acinetobacter_seifertii_NIPH_973	96.8988	Acinetobacter seifertii
Acinetobacter_pittii_WCHAP100017	Acinetobacter_pittii_ATCC_19004	96.9002	Acinetobacter pittii
Acinetobacter_seifertii_AS5	Acinetobacter_seifertii_NIPH_973	96.9006	Acinetobacter seifertii
Acinetobacter_seifertii_AS53	Acinetobacter_seifertii_NIPH_973	96.9019	Acinetobacter seifertii
Acinetobacter_wuhouensis_WCHAW060049	Acinetobacter_wuhouensis_WCHA60	96.9034	Acinetobacter wuhouensis
Acinetobacter_seifertii_AS60	Acinetobacter_seifertii_NIPH_973	96.9053	Acinetobacter seifertii
Acinetobacter_seifertii_AS28	Acinetobacter_seifertii_NIPH_973	96.9064	Acinetobacter seifertii
Acinetobacter_seifertii_AS74	Acinetobacter_seifertii_NIPH_973	96.9071	Acinetobacter seifertii
Acinetobacter_schindleri_S00243	Acinetobacter_schindleri_CIP_107287	96.9109	Acinetobacter schindleri
Acinetobacter_seifertii_AS17	Acinetobacter_seifertii_NIPH_973	96.9131	Acinetobacter seifertii
Acinetobacter_seifertii_TUM15120	Acinetobacter_seifertii_NIPH_973	96.9141	Acinetobacter seifertii
Acinetobacter_pittii_St-12537-91	Acinetobacter_pittii_DSM_25618	96.9158	Acinetobacter pittii
Acinetobacter_sp._1294243	Acinetobacter_pittii_ATCC_19004	96.9215	Acinetobacter pittii
Acinetobacter_sp._Swhac1	Acinetobacter_towneri_DSM_14962	96.9239	Acinetobacter towneri
Acinetobacter_sp._WCHAc010052	Acinetobacter_chinensis_WCHAc010005	96.9264	Acinetobacter chinensis
Acinetobacter_sp._SAT183	Acinetobacter_venetianus_RAG-1	96.9267	Acinetobacter venetianus
Acinetobacter_sp._ANC_3862	Acinetobacter_modestus_CCM_8639	96.9273	Acinetobacter modestus
Acinetobacter_sp._NIPH_542	Acinetobacter_oleivorans_KCTC_23045	96.9307	Acinetobacter oleivorans
Acinetobacter_seifertii_AS39	Acinetobacter_seifertii_NIPH_973	96.9311	Acinetobacter seifertii
Acinetobacter_pittii_AP864	Acinetobacter_pittii_ATCC_19004	96.9317	Acinetobacter pittii
Acinetobacter_lactucae_ANC_4052	Acinetobacter_lactucae_NRRL_B-41902	96.9321	Acinetobacter lactucae
Acinetobacter_pittii_LMO_Bin60	Acinetobacter_pittii_ATCC_19004	96.9322	Acinetobacter pittii
Acinetobacter_oleivorans_ACIN00263	Acinetobacter_oleivorans_KCTC_23045	96.9329	Acinetobacter oleivorans
Acinetobacter_towneri_A6	Acinetobacter_towneri_DSM_14962	96.9334	Acinetobacter towneri
Acinetobacter_pittii_AC15140	Acinetobacter_pittii_ATCC_19004	96.9364	Acinetobacter pittii
Acinetobacter_pittii_St-12275-92	Acinetobacter_pittii_DSM_25618	96.94	Acinetobacter pittii
Acinetobacter_oleivorans_AC1885	Acinetobacter_oleivorans_KCTC_23045	96.9402	Acinetobacter oleivorans
Acinetobacter_oleivorans_TUM15236	Acinetobacter_oleivorans_KCTC_23045	96.9412	Acinetobacter oleivorans
Acinetobacter_seifertii_beef_318	Acinetobacter_seifertii_NIPH_973	96.9418	Acinetobacter seifertii
Acinetobacter_seifertii_ACIN00245	Acinetobacter_seifertii_NIPH_973	96.9438	Acinetobacter seifertii
Acinetobacter_pittii_WCHAP005046	Acinetobacter_pittii_DSM_25618	96.947	Acinetobacter pittii
Acinetobacter_pittii_UKK-0265	Acinetobacter_pittii_DSM_25618	96.9503	Acinetobacter pittii
Acinetobacter_seifertii_S63-3	Acinetobacter_seifertii_NIPH_973	96.9518	Acinetobacter seifertii
Acinetobacter_pittii_AP984	Acinetobacter_pittii_ATCC_19004	96.9535	Acinetobacter pittii
Acinetobacter_pittii_NBRC_110506	Acinetobacter_pittii_ATCC_19004	96.9537	Acinetobacter pittii
Acinetobacter_schindleri_NIPH_900	Acinetobacter_schindleri_CIP_107287	96.9544	Acinetobacter schindleri
Acinetobacter_pittii_WCHAP100023	Acinetobacter_pittii_DSM_25618	96.9583	Acinetobacter pittii
Acinetobacter_oleivorans_PT8	Acinetobacter_oleivorans_KCTC_23045	96.9625	Acinetobacter oleivorans
Acinetobacter_sp._907131	Acinetobacter_pittii_ATCC_19004	96.9629	Acinetobacter pittii
Acinetobacter_pittii_AS012594	Acinetobacter_pittii_DSM_25618	96.9665	Acinetobacter pittii
Acinetobacter_baumannii_UBA6296	Acinetobacter_seifertii_NIPH_973	96.9672	Acinetobacter seifertii
Acinetobacter_sp._YH01015	Acinetobacter_schindleri_CIP_107287	96.9685	Acinetobacter schindleri
Acinetobacter_seifertii_MI30-324	Acinetobacter_seifertii_NIPH_973	96.9714	Acinetobacter seifertii
Acinetobacter_seifertii_KCJK1723	Acinetobacter_seifertii_NIPH_973	96.9729	Acinetobacter seifertii
Acinetobacter_pittii_ABBL033	Acinetobacter_pittii_DSM_25618	96.9799	Acinetobacter pittii
Acinetobacter_sp._Ac-14	Acinetobacter_pittii_DSM_25618	96.9934	Acinetobacter pittii
Acinetobacter_schindleri_HZE23-1	Acinetobacter_schindleri_CIP_107287	96.9945	Acinetobacter schindleri
Acinetobacter_schindleri_H3	Acinetobacter_schindleri_CIP_107287	96.9961	Acinetobacter schindleri
Acinetobacter_seifertii_AS48	Acinetobacter_seifertii_NIPH_973	97.0098	Acinetobacter seifertii
Acinetobacter_pittii_NBRC_110505	Acinetobacter_pittii_ATCC_19004	97.0122	Acinetobacter pittii
Acinetobacter_schindleri_SGAir0122	Acinetobacter_schindleri_CIP_107287	97.013	Acinetobacter schindleri
Acinetobacter_pittii_B-3780	Acinetobacter_pittii_DSM_25618	97.0134	Acinetobacter pittii
Acinetobacter_genomosp._33YU_A360	Acinetobacter_seifertii_NIPH_973	97.0144	Acinetobacter seifertii
Acinetobacter_sp._883425	Acinetobacter_pittii_ATCC_19004	97.0166	Acinetobacter pittii
Acinetobacter_pittii_WCHAP100007	Acinetobacter_pittii_ATCC_19004	97.0202	Acinetobacter pittii
Acinetobacter_sp._BIGb0102	Acinetobacter_vivianii_CCM_8642	97.0227	Acinetobacter vivianii
Acinetobacter_pittii_AMA10	Acinetobacter_pittii_ATCC_19004	97.023	Acinetobacter pittii
Acinetobacter_indicus_LUH5041	Acinetobacter_indicus_CIP_110367	97.0241	Acinetobacter indicus
Acinetobacter_pittii_WCHAP100010	Acinetobacter_pittii_ATCC_19004	97.0241	Acinetobacter pittii
Acinetobacter_sp._ACIN00229	Acinetobacter_oleivorans_KCTC_23045	97.0273	Acinetobacter oleivorans
Acinetobacter_sp._LCT-H3	Acinetobacter_schindleri_CIP_107287	97.0286	Acinetobacter schindleri
Acinetobacter_sp._NIPH_758	Acinetobacter_vivianii_CCM_8642	97.029	Acinetobacter vivianii
Acinetobacter_sp._ACNIH2	Acinetobacter_tandoii_DSM_14970	97.0301	Acinetobacter tandoii
Acinetobacter_pittii_UKK-0554	Acinetobacter_pittii_DSM_25618	97.0324	Acinetobacter pittii
Acinetobacter_pittii_ARLG1957	Acinetobacter_pittii_DSM_25618	97.0361	Acinetobacter pittii
Acinetobacter_seifertii_TUM15297	Acinetobacter_seifertii_NIPH_973	97.0371	Acinetobacter seifertii
Acinetobacter_pittii_4300STDY7045887	Acinetobacter_pittii_ATCC_19004	97.0385	Acinetobacter pittii
Acinetobacter_sp._BEC1-S18-ESBL-01	Acinetobacter_pittii_ATCC_19004	97.0406	Acinetobacter pittii
Acinetobacter_pittii_4300STDY7045719	Acinetobacter_pittii_DSM_25618	97.0428	Acinetobacter pittii
Acinetobacter_vivianii_KJ-1	Acinetobacter_vivianii_CCM_8642	97.0433	Acinetobacter vivianii
Acinetobacter_sp._NP28	Acinetobacter_venetianus_RAG-1	97.0447	Acinetobacter venetianus
Acinetobacter_pittii_TG6411	Acinetobacter_pittii_ATCC_19004	97.0468	Acinetobacter pittii
Acinetobacter_sp._HA	Acinetobacter_schindleri_CIP_107287	97.047	Acinetobacter schindleri
Acinetobacter_baumannii_SDF	Acinetobacter_baumannii_ATCC_19606	97.0473	Acinetobacter baumannii
Acinetobacter_sp._CIP_102129	Acinetobacter_parvus_DSM_16617	97.0521	Acinetobacter parvus
Acinetobacter_pittii_PR301	Acinetobacter_pittii_ATCC_19004	97.0542	Acinetobacter pittii
Acinetobacter_pittii_OCU_Ac12	Acinetobacter_pittii_DSM_25618	97.0544	Acinetobacter pittii
Acinetobacter_seifertii_AS9	Acinetobacter_seifertii_NIPH_973	97.0572	Acinetobacter seifertii
Acinetobacter_oleivorans_TUM15571	Acinetobacter_oleivorans_KCTC_23045	97.0595	Acinetobacter oleivorans
Acinetobacter_pittii_WCHAP100022	Acinetobacter_pittii_ATCC_19004	97.0674	Acinetobacter pittii
Acinetobacter_pittii_ARLG1789	Acinetobacter_pittii_DSM_25618	97.0689	Acinetobacter pittii
Acinetobacter_pittii_PR393	Acinetobacter_pittii_DSM_25618	97.0704	Acinetobacter pittii
Acinetobacter_terrae_ANC_4281	Acinetobacter_terrae_ANC_4282	97.0787	Acinetobacter terrae
Acinetobacter_sp._1264765	Acinetobacter_pittii_DSM_25618	97.0792	Acinetobacter pittii
Acinetobacter_seifertii_TUM15424	Acinetobacter_seifertii_NIPH_973	97.0804	Acinetobacter seifertii
Acinetobacter_ursingii_Acinetobacter_ursingii_BgEED03	Acinetobacter_ursingii_DSM_16037	97.0808	Acinetobacter ursingii
Acinetobacter_sp._DUT-2	Acinetobacter_pittii_ATCC_19004	97.0826	Acinetobacter pittii
Acinetobacter_pittii_St-17942-91	Acinetobacter_pittii_DSM_25618	97.0894	Acinetobacter pittii
Acinetobacter_pittii_TG31979	Acinetobacter_pittii_ATCC_19004	97.0992	Acinetobacter pittii
Acinetobacter_pittii_TG91976	Acinetobacter_pittii_DSM_25618	97.0996	Acinetobacter pittii
Acinetobacter_pittii_UNC434CL69Tsu2S25	Acinetobacter_pittii_ATCC_19004	97.1003	Acinetobacter pittii
Acinetobacter_pittii_ABBL042	Acinetobacter_pittii_DSM_25618	97.1034	Acinetobacter pittii
Acinetobacter_pittii_ANC_3678	Acinetobacter_pittii_ATCC_19004	97.1034	Acinetobacter pittii
Acinetobacter_pittii_332_ABCC	Acinetobacter_pittii_DSM_25618	97.1036	Acinetobacter pittii
Acinetobacter_pittii_ABBL024	Acinetobacter_pittii_DSM_25618	97.1128	Acinetobacter pittii
Acinetobacter_pittii_TCM292	Acinetobacter_pittii_ATCC_19004	97.1132	Acinetobacter pittii
Acinetobacter_schindleri_HZE33-1	Acinetobacter_schindleri_CIP_107287	97.1162	Acinetobacter schindleri
Acinetobacter_seifertii_UBA3035	Acinetobacter_seifertii_NIPH_973	97.1163	Acinetobacter seifertii
Acinetobacter_calcoaceticus_NIPH_13	Acinetobacter_calcoaceticus_DSM_30006	97.1201	Acinetobacter calcoaceticus
Acinetobacter_seifertii_AS23	Acinetobacter_seifertii_NIPH_973	97.1212	Acinetobacter seifertii
Acinetobacter_indicus_XG03	Acinetobacter_indicus_CIP_110367	97.1232	Acinetobacter indicus
Acinetobacter_pittii_ACIN00195	Acinetobacter_pittii_DSM_25618	97.1241	Acinetobacter pittii
Acinetobacter_pittii_TG41247	Acinetobacter_pittii_DSM_25618	97.1243	Acinetobacter pittii
Acinetobacter_pittii_ABBL046	Acinetobacter_pittii_DSM_25618	97.1277	Acinetobacter pittii
Acinetobacter_pittii_ARLG1764	Acinetobacter_pittii_DSM_25618	97.1308	Acinetobacter pittii
Acinetobacter_pittii_MGYG-HGUT-02346	Acinetobacter_pittii_DSM_25618	97.1316	Acinetobacter pittii
Acinetobacter_sp._1245249	Acinetobacter_pittii_DSM_25618	97.1316	Acinetobacter pittii
Acinetobacter_pittii_TG41017	Acinetobacter_pittii_DSM_25618	97.1321	Acinetobacter pittii
Acinetobacter_indicus_IHIT27599	Acinetobacter_indicus_CIP_110367	97.1332	Acinetobacter indicus
Acinetobacter_sp._BS1	Acinetobacter_pittii_ATCC_19004	97.1369	Acinetobacter pittii
Acinetobacter_seifertii_AS79	Acinetobacter_seifertii_NIPH_973	97.1406	Acinetobacter seifertii
Acinetobacter_sp._SM1B	Acinetobacter_schindleri_CIP_107287	97.15	Acinetobacter schindleri
Acinetobacter_sp._1578804	Acinetobacter_pittii_DSM_25618	97.1525	Acinetobacter pittii
Acinetobacter_sp._1564232	Acinetobacter_pittii_DSM_25618	97.1576	Acinetobacter pittii
Acinetobacter_haemolyticus_AN20	Acinetobacter_haemolyticus_MTCC_9819	97.1599	Acinetobacter haemolyticus
Acinetobacter_haemolyticus_AN34	Acinetobacter_haemolyticus_MTCC_9819	97.1606	Acinetobacter haemolyticus
Acinetobacter_sp._YH16053	Acinetobacter_towneri_DSM_14962	97.1619	Acinetobacter towneri
Acinetobacter_ursingii_TUM15525	Acinetobacter_ursingii_DSM_16037	97.1643	Acinetobacter ursingii
Acinetobacter_venetianus_SZUA-1530	Acinetobacter_venetianus_RAG-1	97.1654	Acinetobacter venetianus
Acinetobacter_pittii_Colony142	Acinetobacter_pittii_DSM_25618	97.1663	Acinetobacter pittii
Acinetobacter_indicus_IHIT27630	Acinetobacter_indicus_CIP_110367	97.1703	Acinetobacter indicus
Acinetobacter_indicus_IHIT31227	Acinetobacter_indicus_CIP_110367	97.1704	Acinetobacter indicus
Acinetobacter_schindleri_HZE30-1	Acinetobacter_schindleri_CIP_107287	97.1733	Acinetobacter schindleri
Acinetobacter_sp._NRRL_B-65365	Acinetobacter_vivianii_CCM_8642	97.177	Acinetobacter vivianii
Acinetobacter_haemolyticus_XH900	Acinetobacter_haemolyticus_MTCC_9819	97.181	Acinetobacter haemolyticus
Acinetobacter_haemolyticus_TJS01	Acinetobacter_haemolyticus_MTCC_9819	97.1841	Acinetobacter haemolyticus
Acinetobacter_haemolyticus_AN60	Acinetobacter_haemolyticus_MTCC_9819	97.1852	Acinetobacter haemolyticus
Acinetobacter_indicus_XG01	Acinetobacter_indicus_CIP_110367	97.1856	Acinetobacter indicus
Acinetobacter_seifertii_FDAARGOS_1400	Acinetobacter_seifertii_NIPH_973	97.187	Acinetobacter seifertii
Acinetobacter_bereziniae_TUM15358	Acinetobacter_bereziniae_LMG_1003	97.1879	Acinetobacter bereziniae
Acinetobacter_sp._FDAARGOS_515	Acinetobacter_ursingii_DSM_16037	97.1887	Acinetobacter ursingii
Acinetobacter_ursingii_421_ABAU	Acinetobacter_ursingii_CIP_107286	97.19	Acinetobacter ursingii
Acinetobacter_sp._SWBY1	Acinetobacter_towneri_DSM_14962	97.1931	Acinetobacter towneri
Acinetobacter_ursingii_TUM15519	Acinetobacter_ursingii_DSM_16037	97.1987	Acinetobacter ursingii
Acinetobacter_indicus_IHIT32860	Acinetobacter_indicus_CIP_110367	97.2042	Acinetobacter indicus
Acinetobacter_indicus_IHIT31230	Acinetobacter_indicus_CIP_110367	97.2119	Acinetobacter indicus
Acinetobacter_indicus_AI18	Acinetobacter_indicus_CIP_110367	97.2189	Acinetobacter indicus
Acinetobacter_ursingii_TUM15491	Acinetobacter_ursingii_DSM_16037	97.2203	Acinetobacter ursingii
Acinetobacter_indicus_IHIT31216	Acinetobacter_indicus_CIP_110367	97.2216	Acinetobacter indicus
Acinetobacter_ursingii_TUM15408	Acinetobacter_ursingii_DSM_16037	97.2239	Acinetobacter ursingii
Acinetobacter_indicus_IHIT31229	Acinetobacter_indicus_CIP_110367	97.2258	Acinetobacter indicus
Acinetobacter_haemolyticus_AN61	Acinetobacter_haemolyticus_MTCC_9819	97.23	Acinetobacter haemolyticus
Acinetobacter_pittii_PR316	Acinetobacter_pittii_ATCC_19004	97.236	Acinetobacter pittii
Acinetobacter_baumannii_AC1633	Acinetobacter_baumannii_ATCC_19606	97.2498	Acinetobacter baumannii
Acinetobacter_indicus_IHIT31223	Acinetobacter_indicus_CIP_110367	97.2506	Acinetobacter indicus
Acinetobacter_sp._neg1	Acinetobacter_vivianii_CCM_8642	97.2519	Acinetobacter vivianii
Acinetobacter_vivianii_ACIN00184	Acinetobacter_vivianii_CCM_8642	97.2549	Acinetobacter vivianii
Acinetobacter_haemolyticus_AN63	Acinetobacter_haemolyticus_MTCC_9819	97.257	Acinetobacter haemolyticus
Acinetobacter_haemolyticus_AN10	Acinetobacter_haemolyticus_MTCC_9819	97.2588	Acinetobacter haemolyticus
Acinetobacter_baumannii_MRSN7460	Acinetobacter_baumannii_CIP_70.34	97.2593	Acinetobacter baumannii
Acinetobacter_ursingii_TUM15503	Acinetobacter_ursingii_DSM_16037	97.2626	Acinetobacter ursingii
Acinetobacter_indicus_AI37	Acinetobacter_indicus_CIP_110367	97.2639	Acinetobacter indicus
Acinetobacter_tandoii_W4-4-4	Acinetobacter_tandoii_CIP_107469	97.2655	Acinetobacter tandoii
Acinetobacter_indicus_IHIT33295	Acinetobacter_indicus_CIP_110367	97.2668	Acinetobacter indicus
Acinetobacter_sp._YH12151	Acinetobacter_pseudolwoffii_ANC_5044	97.2705	Acinetobacter pseudolwoffii
Acinetobacter_sp._SwsAc5	Acinetobacter_towneri_DSM_14962	97.274	Acinetobacter towneri
Acinetobacter_lanii_187	Acinetobacter_lanii_185	97.2743	Acinetobacter lanii
Acinetobacter_junii_SB132	Acinetobacter_junii_CIP_64.5	97.2759	Acinetobacter junii
Acinetobacter_sp._YH12255	Acinetobacter_pseudolwoffii_ANC_5044	97.2802	Acinetobacter pseudolwoffii
Acinetobacter_junii_AJ_243	Acinetobacter_junii_CIP_64.5	97.2823	Acinetobacter junii
Acinetobacter_baumannii_E47	Acinetobacter_baumannii_ATCC_19606	97.2845	Acinetobacter baumannii
Acinetobacter_indicus_IHIT31225	Acinetobacter_indicus_CIP_110367	97.2861	Acinetobacter indicus
Acinetobacter_sp._YH12136	Acinetobacter_towneri_DSM_14962	97.2937	Acinetobacter towneri
Acinetobacter_haemolyticus_AN7	Acinetobacter_haemolyticus_CIP_64.3	97.2965	Acinetobacter haemolyticus
Acinetobacter_haemolyticus_TG41244	Acinetobacter_haemolyticus_MTCC_9819	97.2973	Acinetobacter haemolyticus
Acinetobacter_indicus_IHIT31215	Acinetobacter_indicus_CIP_110367	97.3012	Acinetobacter indicus
Acinetobacter_ursingii_TUM15527	Acinetobacter_ursingii_DSM_16037	97.3054	Acinetobacter ursingii
Acinetobacter_indicus_AI25	Acinetobacter_indicus_CIP_110367	97.3062	Acinetobacter indicus
Acinetobacter_sp._YT-02	Acinetobacter_towneri_DSM_14962	97.3072	Acinetobacter towneri
Acinetobacter_ursingii_TUM15054	Acinetobacter_ursingii_DSM_16037	97.3087	Acinetobacter ursingii
Acinetobacter_ursingii_TUM15289	Acinetobacter_ursingii_DSM_16037	97.3115	Acinetobacter ursingii
Acinetobacter_haemolyticus_TJR01	Acinetobacter_haemolyticus_MTCC_9819	97.3139	Acinetobacter haemolyticus
Acinetobacter_lactucae_OTEC-02	Acinetobacter_lactucae_NRRL_B-41902	97.3144	Acinetobacter lactucae
Acinetobacter_indicus_IHIT31220	Acinetobacter_indicus_CIP_110367	97.315	Acinetobacter indicus
Acinetobacter_indicus_AI35	Acinetobacter_indicus_CIP_110367	97.3175	Acinetobacter indicus
Acinetobacter_ursingii_TUM15569	Acinetobacter_ursingii_DSM_16037	97.3189	Acinetobacter ursingii
Acinetobacter_calcoaceticus_GK1	Acinetobacter_calcoaceticus_DSM_30006	97.3191	Acinetobacter calcoaceticus
Acinetobacter_ursingii_TUM15111	Acinetobacter_ursingii_DSM_16037	97.3205	Acinetobacter ursingii
Acinetobacter_sp._CIP_102637	Acinetobacter_parvus_DSM_16617	97.3207	Acinetobacter parvus
Acinetobacter_sp._YH01006	Acinetobacter_pseudolwoffii_ANC_5044	97.3228	Acinetobacter pseudolwoffii
Acinetobacter_sp._YH12131	Acinetobacter_towneri_DSM_14962	97.3236	Acinetobacter towneri
Acinetobacter_haemolyticus_AN3	Acinetobacter_haemolyticus_MTCC_9819	97.3249	Acinetobacter haemolyticus
Acinetobacter_baumannii_DMS06669	Acinetobacter_baumannii_JCM_6841	97.3256	Acinetobacter baumannii
Acinetobacter_sp._YH12106	Acinetobacter_pseudolwoffii_ANC_5044	97.3303	Acinetobacter pseudolwoffii
Acinetobacter_indicus_AI1	Acinetobacter_indicus_CIP_110367	97.3308	Acinetobacter indicus
Acinetobacter_sp._YH12153	Acinetobacter_pseudolwoffii_ANC_5044	97.3309	Acinetobacter pseudolwoffii
Acinetobacter_junii_WCHAJ010047	Acinetobacter_junii_CIP_64.5	97.3327	Acinetobacter junii
Acinetobacter_baumannii_233846	Acinetobacter_baumannii_DSM_30007	97.34	Acinetobacter baumannii
Acinetobacter_indicus_94-2	Acinetobacter_indicus_CIP_110367	97.3405	Acinetobacter indicus
Acinetobacter_junii_ACIN00233	Acinetobacter_junii_CIP_64.5	97.3423	Acinetobacter junii
Acinetobacter_sp._ACNIH1	Acinetobacter_variabilis_NIPH_2171	97.3426	Acinetobacter variabilis
Acinetobacter_indicus_IHIT31228	Acinetobacter_indicus_CIP_110367	97.3438	Acinetobacter indicus
Acinetobacter_calcoaceticus_RUH2202	Acinetobacter_calcoaceticus_DSM_30006	97.3455	Acinetobacter calcoaceticus
Acinetobacter_indicus_IHIT32859	Acinetobacter_indicus_CIP_110367	97.349	Acinetobacter indicus
Acinetobacter_junii_YR7	Acinetobacter_junii_CIP_64.5	97.3494	Acinetobacter junii
Acinetobacter_indicus_IHIT31669	Acinetobacter_indicus_CIP_110367	97.3501	Acinetobacter indicus
Acinetobacter_indicus_IHIT31232	Acinetobacter_indicus_CIP_110367	97.3504	Acinetobacter indicus
Acinetobacter_sp._SK-43	Acinetobacter_junii_CIP_64.5	97.3559	Acinetobacter junii
Acinetobacter_sp._YH12103	Acinetobacter_pseudolwoffii_ANC_5044	97.3581	Acinetobacter pseudolwoffii
Acinetobacter_calcoaceticus_RS3	Acinetobacter_calcoaceticus_DSM_30006	97.3587	Acinetobacter calcoaceticus
Acinetobacter_indicus_IHIT32861	Acinetobacter_indicus_CIP_110367	97.3617	Acinetobacter indicus
Acinetobacter_indicus_80-1-2	Acinetobacter_indicus_CIP_110367	97.3618	Acinetobacter indicus
Acinetobacter_baumannii_SP5538	Acinetobacter_baumannii_DSM_30007	97.363	Acinetobacter baumannii
Acinetobacter_indicus_AI11	Acinetobacter_indicus_CIP_110367	97.3642	Acinetobacter indicus
Acinetobacter_baumannii_FDAARGOS_540	Acinetobacter_baumannii_CIP_70.34	97.3653	Acinetobacter baumannii
Acinetobacter_indicus_AI38	Acinetobacter_indicus_CIP_110367	97.3658	Acinetobacter indicus
Acinetobacter_indicus_IHIT31218	Acinetobacter_indicus_CIP_110367	97.3692	Acinetobacter indicus
Acinetobacter_baumannii_36-1454	Acinetobacter_baumannii_ATCC_19606	97.3699	Acinetobacter baumannii
Acinetobacter_junii_NIPH_182	Acinetobacter_junii_CIP_64.5	97.3709	Acinetobacter junii
Acinetobacter_indicus_AI41	Acinetobacter_indicus_CIP_110367	97.3715	Acinetobacter indicus
Acinetobacter_ursingii_TUM15522	Acinetobacter_ursingii_DSM_16037	97.3783	Acinetobacter ursingii
Acinetobacter_defluvii_Ac_1538	Acinetobacter_defluvii_WCHA30	97.3798	Acinetobacter defluvii
Acinetobacter_ursingii_NIPH_706	Acinetobacter_ursingii_DSM_16037	97.3799	Acinetobacter ursingii
Acinetobacter_indicus_IHIT31224	Acinetobacter_indicus_CIP_110367	97.3833	Acinetobacter indicus
Acinetobacter_baumannii_BAuABod-3	Acinetobacter_baumannii_DSM_30007	97.3869	Acinetobacter baumannii
Acinetobacter_baumannii_SP4433	Acinetobacter_baumannii_DSM_30007	97.387	Acinetobacter baumannii
Acinetobacter_indicus_AI30	Acinetobacter_indicus_CIP_110367	97.3917	Acinetobacter indicus
Acinetobacter_sp._ANC_5318	Acinetobacter_pseudolwoffii_ANC_5044	97.395	Acinetobacter pseudolwoffii
Acinetobacter_indicus_AI40	Acinetobacter_indicus_CIP_110367	97.3959	Acinetobacter indicus
Acinetobacter_ursingii_TUM15547	Acinetobacter_ursingii_DSM_16037	97.3968	Acinetobacter ursingii
Acinetobacter_baumannii_1419130	Acinetobacter_baumannii_CIP_70.34	97.3972	Acinetobacter baumannii
Acinetobacter_venetianus_LUH7437	Acinetobacter_venetianus_RAG-1	97.3977	Acinetobacter venetianus
Acinetobacter_baumannii_SP192	Acinetobacter_baumannii_JCM_6841	97.3978	Acinetobacter baumannii
Acinetobacter_indicus_AI6	Acinetobacter_indicus_CIP_110367	97.3978	Acinetobacter indicus
Acinetobacter_indicus_IHIT32429	Acinetobacter_indicus_CIP_110367	97.3981	Acinetobacter indicus
Acinetobacter_baumannii_Naval-18	Acinetobacter_baumannii_ATCC_19606	97.3987	Acinetobacter baumannii
Acinetobacter_indicus_AI34	Acinetobacter_indicus_CIP_110367	97.3989	Acinetobacter indicus
Acinetobacter_baumannii_CI86	Acinetobacter_baumannii_ATCC_19606	97.3995	Acinetobacter baumannii
Acinetobacter_baumannii_207_18	Acinetobacter_baumannii_DSM_30007	97.3998	Acinetobacter baumannii
Acinetobacter_indicus_AI28	Acinetobacter_indicus_CIP_110367	97.4001	Acinetobacter indicus
Acinetobacter_baumannii_P7774	Acinetobacter_baumannii_DSM_30007	97.4011	Acinetobacter baumannii
Acinetobacter_baumannii_ABBL018	Acinetobacter_baumannii_DSM_30007	97.4023	Acinetobacter baumannii
Acinetobacter_baumannii_SP4956	Acinetobacter_baumannii_CIP_70.34	97.4028	Acinetobacter baumannii
Acinetobacter_indicus_AI15	Acinetobacter_indicus_CIP_110367	97.4029	Acinetobacter indicus
Acinetobacter_sp._Root1280	Acinetobacter_guillouiae_CIP_63.46	97.4048	Acinetobacter guillouiae
Acinetobacter_ursingii_UBA1533	Acinetobacter_ursingii_DSM_16037	97.4075	Acinetobacter ursingii
Acinetobacter_baumannii_PR374	Acinetobacter_baumannii_ATCC_19606	97.4086	Acinetobacter baumannii
Acinetobacter_baumannii_17A1904	Acinetobacter_baumannii_DSM_30007	97.4089	Acinetobacter baumannii
Acinetobacter_baumannii_BA35394	Acinetobacter_baumannii_DSM_30007	97.4106	Acinetobacter baumannii
Acinetobacter_pittii_XH765	Acinetobacter_pittii_DSM_25618	97.4116	Acinetobacter pittii
Acinetobacter_indicus_CMG3-2	Acinetobacter_indicus_CIP_110367	97.4127	Acinetobacter indicus
Acinetobacter_baumannii_SP5394	Acinetobacter_baumannii_DSM_30007	97.4146	Acinetobacter baumannii
Acinetobacter_indicus_IHIT33298	Acinetobacter_indicus_CIP_110367	97.4152	Acinetobacter indicus
Acinetobacter_variabilis_RYU24	Acinetobacter_variabilis_NIPH_2171	97.4158	Acinetobacter variabilis
Acinetobacter_baumannii_5021_13	Acinetobacter_baumannii_ATCC_19606	97.4162	Acinetobacter baumannii
Acinetobacter_baumannii_ARLG1873	Acinetobacter_baumannii_CIP_70.34	97.4166	Acinetobacter baumannii
Acinetobacter_ursingii_TUM15406	Acinetobacter_ursingii_DSM_16037	97.4179	Acinetobacter ursingii
Acinetobacter_ursingii_TUM15518	Acinetobacter_ursingii_DSM_16037	97.419	Acinetobacter ursingii
Acinetobacter_sp._UBA3461	Acinetobacter_schindleri_CIP_107287	97.4211	Acinetobacter schindleri
Acinetobacter_baumannii_Ab59	Acinetobacter_baumannii_DSM_30007	97.4215	Acinetobacter baumannii
Acinetobacter_baumannii_AB43	Acinetobacter_baumannii_CIP_70.34	97.4217	Acinetobacter baumannii
Acinetobacter_indicus_IHIT32862	Acinetobacter_indicus_CIP_110367	97.4231	Acinetobacter indicus
Acinetobacter_baumannii_OCU_Ac18	Acinetobacter_baumannii_ATCC_19606	97.426	Acinetobacter baumannii
Acinetobacter_ursingii_NBRC_110512	Acinetobacter_ursingii_DSM_16037	97.4262	Acinetobacter ursingii
Acinetobacter_sp._YH12105	Acinetobacter_pseudolwoffii_ANC_5044	97.4264	Acinetobacter pseudolwoffii
Acinetobacter_indicus_B18	Acinetobacter_indicus_CIP_110367	97.4268	Acinetobacter indicus
Acinetobacter_junii_lzh-X15	Acinetobacter_junii_CIP_64.5	97.4273	Acinetobacter junii
Acinetobacter_sp._YH16051	Acinetobacter_towneri_DSM_14962	97.4285	Acinetobacter towneri
Acinetobacter_baumannii_HWBA8	Acinetobacter_baumannii_DSM_30007	97.4292	Acinetobacter baumannii
Acinetobacter_baumannii_WM97a	Acinetobacter_baumannii_JCM_6841	97.4305	Acinetobacter baumannii
Acinetobacter_ursingii_TUM15517	Acinetobacter_ursingii_DSM_16037	97.4308	Acinetobacter ursingii
Acinetobacter_baumannii_VB82	Acinetobacter_baumannii_JCM_6841	97.4326	Acinetobacter baumannii
Acinetobacter_baumannii_CI79	Acinetobacter_baumannii_DSM_30007	97.4333	Acinetobacter baumannii
Acinetobacter_junii_KCTC_42611	Acinetobacter_junii_CIP_64.5	97.4339	Acinetobacter junii
Acinetobacter_baumannii_CCBH26454	Acinetobacter_baumannii_CIP_70.34	97.4344	Acinetobacter baumannii
Acinetobacter_ursingii_UBA3251	Acinetobacter_ursingii_DSM_16037	97.4349	Acinetobacter ursingii
Acinetobacter_haemolyticus_A109R1B4	Acinetobacter_haemolyticus_MTCC_9819	97.4353	Acinetobacter haemolyticus
Acinetobacter_sp._YH01008	Acinetobacter_pseudolwoffii_ANC_5044	97.4358	Acinetobacter pseudolwoffii
Acinetobacter_baumannii_TUM16645	Acinetobacter_baumannii_ATCC_19606	97.4359	Acinetobacter baumannii
Acinetobacter_lactucae_ME27	Acinetobacter_lactucae_NRRL_B-41902	97.438	Acinetobacter lactucae
Acinetobacter_ursingii_TUM15492	Acinetobacter_ursingii_DSM_16037	97.4398	Acinetobacter ursingii
Acinetobacter_baumannii_PR337	Acinetobacter_baumannii_DSM_30007	97.4402	Acinetobacter baumannii
Acinetobacter_baumannii_VB35179	Acinetobacter_baumannii_DSM_30007	97.4404	Acinetobacter baumannii
Acinetobacter_sp._F9	Acinetobacter_pseudolwoffii_ANC_5044	97.4422	Acinetobacter pseudolwoffii
Acinetobacter_baumannii_SP4522	Acinetobacter_baumannii_DSM_30007	97.4431	Acinetobacter baumannii
Acinetobacter_baumannii_MRSN32104	Acinetobacter_baumannii_DSM_30007	97.4431	Acinetobacter baumannii
Acinetobacter_calcoaceticus_TG19585	Acinetobacter_calcoaceticus_DSM_30006	97.4439	Acinetobacter calcoaceticus
Acinetobacter_baumannii_AMA3	Acinetobacter_baumannii_DSM_30007	97.4447	Acinetobacter baumannii
Acinetobacter_baumannii_AMA7	Acinetobacter_baumannii_JCM_6841	97.4447	Acinetobacter baumannii
Acinetobacter_baumannii_TUM16624	Acinetobacter_baumannii_ATCC_19606	97.4453	Acinetobacter baumannii
Acinetobacter_indicus_AI2	Acinetobacter_indicus_CIP_110367	97.4454	Acinetobacter indicus
Acinetobacter_ursingii_NBRC_110511	Acinetobacter_ursingii_DSM_16037	97.4456	Acinetobacter ursingii
Acinetobacter_baumannii_YMC2011_7_R812	Acinetobacter_baumannii_DSM_30007	97.4471	Acinetobacter baumannii
Acinetobacter_sp._COS3	Acinetobacter_venetianus_RAG-1	97.4485	Acinetobacter venetianus
Acinetobacter_baumannii_D46	Acinetobacter_baumannii_DSM_30007	97.4496	Acinetobacter baumannii
Acinetobacter_sp._FDAARGOS_559	Acinetobacter_baumannii_DSM_30007	97.45	Acinetobacter baumannii
Acinetobacter_junii_CIP_107470__MTCC_11364	Acinetobacter_junii_CIP_64.5	97.4528	Acinetobacter junii
Acinetobacter_indicus_DFZJA80-1	Acinetobacter_indicus_CIP_110367	97.4533	Acinetobacter indicus
Acinetobacter_baumannii_CRE341	Acinetobacter_baumannii_ATCC_19606	97.4538	Acinetobacter baumannii
Acinetobacter_baumannii_SP500	Acinetobacter_baumannii_CIP_70.34	97.4539	Acinetobacter baumannii
Acinetobacter_baumannii_AMA33	Acinetobacter_baumannii_DSM_30007	97.4542	Acinetobacter baumannii
Acinetobacter_pittii_FDAARGOS_1397	Acinetobacter_lactucae_NRRL_B-41902	97.4543	Acinetobacter lactucae
Acinetobacter_guillouiae_PgBE136	Acinetobacter_guillouiae_CIP_63.46	97.4545	Acinetobacter guillouiae
Acinetobacter_ursingii_UBA2310	Acinetobacter_ursingii_DSM_16037	97.4563	Acinetobacter ursingii
Acinetobacter_sp._UBA2581	Acinetobacter_variabilis_NIPH_2171	97.4563	Acinetobacter variabilis
Acinetobacter_baumannii_AB2828	Acinetobacter_baumannii_DSM_30007	97.4576	Acinetobacter baumannii
Acinetobacter_baumannii_MRSN22112	Acinetobacter_baumannii_CIP_70.34	97.4584	Acinetobacter baumannii
Acinetobacter_baumannii_BA82	Acinetobacter_baumannii_DSM_30007	97.459	Acinetobacter baumannii
Acinetobacter_baumannii_AMA47	Acinetobacter_baumannii_DSM_30007	97.4597	Acinetobacter baumannii
Acinetobacter_sp._YH1901136	Acinetobacter_towneri_DSM_14962	97.4605	Acinetobacter towneri
Acinetobacter_baumannii_NBRC_110490	Acinetobacter_baumannii_DSM_30007	97.4614	Acinetobacter baumannii
Acinetobacter_baumannii_ARLG1317	Acinetobacter_baumannii_DSM_30007	97.4633	Acinetobacter baumannii
Acinetobacter_baumannii_5326	Acinetobacter_baumannii_ATCC_19606	97.4633	Acinetobacter baumannii
Acinetobacter_indicus_AI19	Acinetobacter_indicus_CIP_110367	97.464	Acinetobacter indicus
Acinetobacter_baumannii_TG89548	Acinetobacter_baumannii_ATCC_19606	97.465	Acinetobacter baumannii
Acinetobacter_baumannii_CriePir309	Acinetobacter_baumannii_DSM_30007	97.4663	Acinetobacter baumannii
Acinetobacter_ursingii_UBA2065	Acinetobacter_ursingii_DSM_16037	97.4667	Acinetobacter ursingii
Acinetobacter_baumannii_7804	Acinetobacter_baumannii_DSM_30007	97.4674	Acinetobacter baumannii
Acinetobacter_baumannii_AMA9	Acinetobacter_baumannii_ATCC_19606	97.4677	Acinetobacter baumannii
Acinetobacter_baumannii_AMA31	Acinetobacter_baumannii_JCM_6841	97.4691	Acinetobacter baumannii
Acinetobacter_indicus_IHIT31231	Acinetobacter_indicus_CIP_110367	97.4691	Acinetobacter indicus
Acinetobacter_baumannii_AS012541	Acinetobacter_baumannii_DSM_30007	97.4701	Acinetobacter baumannii
Acinetobacter_baumannii_AMA16	Acinetobacter_baumannii_ATCC_19606	97.4703	Acinetobacter baumannii
Acinetobacter_baumannii_R348	Acinetobacter_baumannii_DSM_30007	97.4729	Acinetobacter baumannii
Acinetobacter_baumannii_AMA5	Acinetobacter_baumannii_DSM_30007	97.4734	Acinetobacter baumannii
Acinetobacter_indicus_AI20	Acinetobacter_indicus_CIP_110367	97.474	Acinetobacter indicus
Acinetobacter_baumannii_AMA45	Acinetobacter_baumannii_DSM_30007	97.4745	Acinetobacter baumannii
Acinetobacter_baumannii_AMA40	Acinetobacter_baumannii_DSM_30007	97.4748	Acinetobacter baumannii
Acinetobacter_baumannii_A-71.198	Acinetobacter_baumannii_JCM_6841	97.4751	Acinetobacter baumannii
Acinetobacter_baumannii_1461963	Acinetobacter_baumannii_ATCC_19606	97.4763	Acinetobacter baumannii
Acinetobacter_baumannii_AB3806	Acinetobacter_baumannii_DSM_30007	97.4765	Acinetobacter baumannii
Acinetobacter_baumannii_AMA41	Acinetobacter_baumannii_DSM_30007	97.477	Acinetobacter baumannii
Acinetobacter_sp._YZS-X1-1	Acinetobacter_variabilis_NIPH_2171	97.4779	Acinetobacter variabilis
Acinetobacter_baumannii_NBRC_110492	Acinetobacter_baumannii_ATCC_19606	97.4782	Acinetobacter baumannii
Acinetobacter_baumannii_PM194229	Acinetobacter_baumannii_ATCC_19606	97.4786	Acinetobacter baumannii
Acinetobacter_baumannii_4300STDY7045893	Acinetobacter_baumannii_DSM_30007	97.4789	Acinetobacter baumannii
Acinetobacter_baumannii_KUSSH14	Acinetobacter_baumannii_DSM_30007	97.4791	Acinetobacter baumannii
Acinetobacter_baumannii_TG02017	Acinetobacter_baumannii_ATCC_19606	97.48	Acinetobacter baumannii
Acinetobacter_baumannii_KUSSH08	Acinetobacter_baumannii_JCM_6841	97.4803	Acinetobacter baumannii
Acinetobacter_baumannii_WP4-W18-ESBL-11	Acinetobacter_baumannii_CIP_70.34	97.4804	Acinetobacter baumannii
Acinetobacter_baumannii_A424	Acinetobacter_baumannii_DSM_30007	97.4806	Acinetobacter baumannii
Acinetobacter_baumannii_916_16	Acinetobacter_baumannii_DSM_30007	97.4806	Acinetobacter baumannii
Acinetobacter_ursingii_TUM15280	Acinetobacter_ursingii_DSM_16037	97.4807	Acinetobacter ursingii
Acinetobacter_nosocomialis_UBA1588	Acinetobacter_nosocomialis_LMG_10619	97.4812	Acinetobacter nosocomialis
Acinetobacter_baumannii_AMA17	Acinetobacter_baumannii_DSM_30007	97.4836	Acinetobacter baumannii
Acinetobacter_baumannii_4300STDY7045824	Acinetobacter_baumannii_DSM_30007	97.484	Acinetobacter baumannii
Acinetobacter_baumannii_161_07	Acinetobacter_baumannii_DSM_30007	97.4842	Acinetobacter baumannii
Acinetobacter_baumannii_E-072658	Acinetobacter_baumannii_ATCC_19606	97.4848	Acinetobacter baumannii
Acinetobacter_baumannii_Ab121	Acinetobacter_baumannii_DSM_30007	97.485	Acinetobacter baumannii
Acinetobacter_baumannii_AMA26	Acinetobacter_baumannii_DSM_30007	97.4864	Acinetobacter baumannii
Acinetobacter_baumannii_SP1713	Acinetobacter_baumannii_DSM_30007	97.4879	Acinetobacter baumannii
Acinetobacter_baumannii_121	Acinetobacter_baumannii_CIP_70.34	97.4883	Acinetobacter baumannii
Acinetobacter_baumannii_CriePir298	Acinetobacter_baumannii_ATCC_19606	97.4885	Acinetobacter baumannii
Acinetobacter_baumannii_Ab04-mff	Acinetobacter_baumannii_JCM_6841	97.4891	Acinetobacter baumannii
Acinetobacter_baumannii_AMA19	Acinetobacter_baumannii_DSM_30007	97.4892	Acinetobacter baumannii
Acinetobacter_baumannii_AS012542	Acinetobacter_baumannii_DSM_30007	97.4897	Acinetobacter baumannii
Acinetobacter_lactucae_QL-1	Acinetobacter_lactucae_NRRL_B-41902	97.4897	Acinetobacter lactucae
Acinetobacter_baumannii_AMA30	Acinetobacter_baumannii_DSM_30007	97.4899	Acinetobacter baumannii
Acinetobacter_baumannii_4300STDY7045795	Acinetobacter_baumannii_DSM_30007	97.4911	Acinetobacter baumannii
Acinetobacter_baumannii_14A626	Acinetobacter_baumannii_DSM_30007	97.4915	Acinetobacter baumannii
Acinetobacter_baumannii_MRSN32892	Acinetobacter_baumannii_ATCC_19606	97.4918	Acinetobacter baumannii
Acinetobacter_baumannii_DETAB-P2	Acinetobacter_baumannii_DSM_30007	97.4919	Acinetobacter baumannii
Acinetobacter_sp._YH16050	Acinetobacter_towneri_DSM_14962	97.4926	Acinetobacter towneri
Acinetobacter_baumannii_MC14	Acinetobacter_baumannii_DSM_30007	97.493	Acinetobacter baumannii
Acinetobacter_baumannii_AMA14	Acinetobacter_baumannii_DSM_30007	97.4933	Acinetobacter baumannii
Acinetobacter_ursingii_NBRC_110605	Acinetobacter_ursingii_DSM_16037	97.4938	Acinetobacter ursingii
Acinetobacter_baumannii_4300STDY7045751	Acinetobacter_baumannii_DSM_30007	97.4944	Acinetobacter baumannii
Acinetobacter_baumannii_va17061857	Acinetobacter_baumannii_DSM_30007	97.4944	Acinetobacter baumannii
Acinetobacter_lactucae_CI78	Acinetobacter_lactucae_NRRL_B-41902	97.495	Acinetobacter lactucae
Acinetobacter_sp._YH12112	Acinetobacter_indicus_CIP_110367	97.4951	Acinetobacter indicus
Acinetobacter_baumannii_4300STDY7045802	Acinetobacter_baumannii_DSM_30007	97.4954	Acinetobacter baumannii
Acinetobacter_baumannii_AMA34	Acinetobacter_baumannii_DSM_30007	97.4962	Acinetobacter baumannii
Acinetobacter_sp._YH12127	Acinetobacter_towneri_DSM_14962	97.4964	Acinetobacter towneri
Acinetobacter_indicus_AI29	Acinetobacter_indicus_CIP_110367	97.4966	Acinetobacter indicus
Acinetobacter_baumannii_4300STDY7045840	Acinetobacter_baumannii_DSM_30007	97.4972	Acinetobacter baumannii
Acinetobacter_sp._YH12119	Acinetobacter_indicus_CIP_110367	97.4983	Acinetobacter indicus
Acinetobacter_junii_SC22	Acinetobacter_junii_CIP_64.5	97.4983	Acinetobacter junii
Acinetobacter_baumannii_Survcare223	Acinetobacter_baumannii_DSM_30007	97.4984	Acinetobacter baumannii
Acinetobacter_pseudolwoffii_XMC5X702	Acinetobacter_pseudolwoffii_ANC_5044	97.4998	Acinetobacter pseudolwoffii
Acinetobacter_baumannii_4300STDY7045786	Acinetobacter_baumannii_DSM_30007	97.5003	Acinetobacter baumannii
Acinetobacter_baumannii_PR350	Acinetobacter_baumannii_DSM_30007	97.5015	Acinetobacter baumannii
Acinetobacter_baumannii_AMA39	Acinetobacter_baumannii_JCM_6841	97.5024	Acinetobacter baumannii
Acinetobacter_baumannii_DR1	Acinetobacter_baumannii_DSM_30007	97.5025	Acinetobacter baumannii
Acinetobacter_nosocomialis_PR365	Acinetobacter_nosocomialis_NIPH_2119	97.5038	Acinetobacter nosocomialis
Acinetobacter_baumannii_MRSN24603	Acinetobacter_baumannii_DSM_30007	97.5045	Acinetobacter baumannii
Acinetobacter_baumannii_AMA37	Acinetobacter_baumannii_JCM_6841	97.5058	Acinetobacter baumannii
Acinetobacter_sp._YH12156	Acinetobacter_pseudolwoffii_ANC_5044	97.506	Acinetobacter pseudolwoffii
Acinetobacter_ursingii_OCU_Ac4	Acinetobacter_ursingii_DSM_16037	97.5066	Acinetobacter ursingii
Acinetobacter_baumannii_AMA35	Acinetobacter_baumannii_DSM_30007	97.5068	Acinetobacter baumannii
Acinetobacter_baumannii_AMA18	Acinetobacter_baumannii_DSM_30007	97.5068	Acinetobacter baumannii
Acinetobacter_ursingii_TUM15411	Acinetobacter_ursingii_DSM_16037	97.5071	Acinetobacter ursingii
Acinetobacter_baumannii_AMA24	Acinetobacter_baumannii_JCM_6841	97.5073	Acinetobacter baumannii
Acinetobacter_venetianus_TUST-DM21	Acinetobacter_venetianus_RAG-1	97.5074	Acinetobacter venetianus
Acinetobacter_nosocomialis_ACIN00166	Acinetobacter_nosocomialis_NIPH_2119	97.5084	Acinetobacter nosocomialis
Acinetobacter_sp._ANC_5347	Acinetobacter_pseudolwoffii_ANC_5044	97.51	Acinetobacter pseudolwoffii
Acinetobacter_baumannii_DS002	Acinetobacter_baumannii_ATCC_19606	97.5103	Acinetobacter baumannii
Acinetobacter_baumannii_AMA25	Acinetobacter_baumannii_DSM_30007	97.511	Acinetobacter baumannii
Acinetobacter_baumannii_MRSN480561	Acinetobacter_baumannii_JCM_6841	97.5111	Acinetobacter baumannii
Acinetobacter_indicus_AI26	Acinetobacter_indicus_CIP_110367	97.5112	Acinetobacter indicus
Acinetobacter_ursingii_TUM15502	Acinetobacter_ursingii_DSM_16037	97.5115	Acinetobacter ursingii
Acinetobacter_baumannii_886_16	Acinetobacter_baumannii_DSM_30007	97.5118	Acinetobacter baumannii
Acinetobacter_venetianus_JKSF06	Acinetobacter_venetianus_RAG-1	97.5121	Acinetobacter venetianus
Acinetobacter_baumannii_SP3155	Acinetobacter_baumannii_DSM_30007	97.5123	Acinetobacter baumannii
Acinetobacter_baumannii_16A1524	Acinetobacter_baumannii_DSM_30007	97.5127	Acinetobacter baumannii
Acinetobacter_baumannii_600_16	Acinetobacter_baumannii_DSM_30007	97.5128	Acinetobacter baumannii
Acinetobacter_baumannii_AMA36	Acinetobacter_baumannii_ATCC_19606	97.5129	Acinetobacter baumannii
Acinetobacter_baumannii_AMA12	Acinetobacter_baumannii_JCM_6841	97.5134	Acinetobacter baumannii
Acinetobacter_baumannii_ARLG1323	Acinetobacter_baumannii_DSM_30007	97.5135	Acinetobacter baumannii
Acinetobacter_baumannii_Ab804	Acinetobacter_baumannii_CIP_70.34	97.5145	Acinetobacter baumannii
Acinetobacter_baumannii_AB3638	Acinetobacter_baumannii_DSM_30007	97.5152	Acinetobacter baumannii
Acinetobacter_baumannii_ZQ4	Acinetobacter_baumannii_ATCC_19606	97.5152	Acinetobacter baumannii
Acinetobacter_pittii_FDAARGOS_1217	Acinetobacter_pittii_DSM_25618	97.5156	Acinetobacter pittii
Acinetobacter_baumannii_ZQ9	Acinetobacter_baumannii_DSM_30007	97.5158	Acinetobacter baumannii
Acinetobacter_baumannii_Aci00860	Acinetobacter_baumannii_ATCC_19606	97.5163	Acinetobacter baumannii
Acinetobacter_ursingii_TUM15501	Acinetobacter_ursingii_DSM_16037	97.5178	Acinetobacter ursingii
Acinetobacter_baumannii_BA14629	Acinetobacter_baumannii_DSM_30007	97.5178	Acinetobacter baumannii
Acinetobacter_ursingii_UBA3890	Acinetobacter_ursingii_DSM_16037	97.5192	Acinetobacter ursingii
Acinetobacter_baumannii_UBA4598	Acinetobacter_baumannii_DSM_30007	97.5194	Acinetobacter baumannii
Acinetobacter_baumannii_AMA28	Acinetobacter_baumannii_DSM_30007	97.5201	Acinetobacter baumannii
Acinetobacter_baumannii_A15	Acinetobacter_baumannii_ATCC_19606	97.5203	Acinetobacter baumannii
Acinetobacter_ursingii_TG29426	Acinetobacter_ursingii_DSM_16037	97.5223	Acinetobacter ursingii
Acinetobacter_pittii_DE0027	Acinetobacter_pittii_ATCC_19004	97.5227	Acinetobacter pittii
Acinetobacter_pittii_NBRC_110508	Acinetobacter_pittii_ATCC_19004	97.5227	Acinetobacter pittii
Acinetobacter_baumannii_16A1365	Acinetobacter_baumannii_DSM_30007	97.5231	Acinetobacter baumannii
Acinetobacter_indicus_AI8	Acinetobacter_indicus_CIP_110367	97.5236	Acinetobacter indicus
Acinetobacter_baumannii_AMA13	Acinetobacter_baumannii_ATCC_19606	97.5239	Acinetobacter baumannii
Acinetobacter_baumannii_HEU3	Acinetobacter_baumannii_DSM_30007	97.524	Acinetobacter baumannii
Acinetobacter_baumannii_276_17	Acinetobacter_baumannii_ATCC_19606	97.5251	Acinetobacter baumannii
Acinetobacter_baumannii_MC8	Acinetobacter_baumannii_JCM_6841	97.5256	Acinetobacter baumannii
Acinetobacter_baumannii_GTC_03322	Acinetobacter_baumannii_ATCC_19606	97.5263	Acinetobacter baumannii
Acinetobacter_baumannii_SCPM-O-B-8559_3239	Acinetobacter_baumannii_CIP_70.34	97.5264	Acinetobacter baumannii
Acinetobacter_baumannii_MRSN15084	Acinetobacter_baumannii_CIP_70.34	97.5268	Acinetobacter baumannii
Acinetobacter_baumannii_29282	Acinetobacter_baumannii_ATCC_19606	97.5269	Acinetobacter baumannii
Acinetobacter_indicus_AI10	Acinetobacter_indicus_CIP_110367	97.5273	Acinetobacter indicus
Acinetobacter_baumannii_AMA6	Acinetobacter_baumannii_DSM_30007	97.5283	Acinetobacter baumannii
Acinetobacter_baumannii_ARLG1941	Acinetobacter_baumannii_DSM_30007	97.5289	Acinetobacter baumannii
Acinetobacter_baumannii_C1T1-1	Acinetobacter_baumannii_DSM_30007	97.5299	Acinetobacter baumannii
Acinetobacter_baumannii_MC29	Acinetobacter_baumannii_DSM_30007	97.5308	Acinetobacter baumannii
Acinetobacter_baumannii_NBRC_110491	Acinetobacter_baumannii_ATCC_19606	97.531	Acinetobacter baumannii
Acinetobacter_junii_UBA2147	Acinetobacter_junii_CIP_64.5	97.531	Acinetobacter junii
Acinetobacter_baumannii_GTC_03323	Acinetobacter_baumannii_ATCC_19606	97.532	Acinetobacter baumannii
Acinetobacter_baumannii_OIFC143	Acinetobacter_baumannii_DSM_30007	97.5327	Acinetobacter baumannii
Acinetobacter_ursingii_TUM15523	Acinetobacter_ursingii_DSM_16037	97.5327	Acinetobacter ursingii
Acinetobacter_baumannii_MRSN7153	Acinetobacter_baumannii_ATCC_19606	97.5328	Acinetobacter baumannii
Acinetobacter_baumannii_AMA44	Acinetobacter_baumannii_ATCC_19606	97.5332	Acinetobacter baumannii
Acinetobacter_baumannii_545_16	Acinetobacter_baumannii_DSM_30007	97.5332	Acinetobacter baumannii
Acinetobacter_baumannii_C1T1-2_b	Acinetobacter_baumannii_DSM_30007	97.5334	Acinetobacter baumannii
Acinetobacter_baumannii_IHIT17886	Acinetobacter_baumannii_ATCC_19606	97.5334	Acinetobacter baumannii
Acinetobacter_baumannii_TUM16644	Acinetobacter_baumannii_ATCC_19606	97.5351	Acinetobacter baumannii
Acinetobacter_baumannii_TUMA	Acinetobacter_baumannii_JCM_6841	97.5362	Acinetobacter baumannii
Acinetobacter_baumannii_H31506	Acinetobacter_baumannii_DSM_30007	97.5373	Acinetobacter baumannii
Acinetobacter_baumannii_PR373	Acinetobacter_baumannii_ATCC_19606	97.5374	Acinetobacter baumannii
Acinetobacter_baumannii_Aci00718	Acinetobacter_baumannii_DSM_30007	97.5382	Acinetobacter baumannii
Acinetobacter_baumannii_40288	Acinetobacter_baumannii_DSM_30007	97.5385	Acinetobacter baumannii
Acinetobacter_baumannii_12A070	Acinetobacter_baumannii_DSM_30007	97.5389	Acinetobacter baumannii
Acinetobacter_baumannii_AB-HZ-B75	Acinetobacter_baumannii_DSM_30007	97.5391	Acinetobacter baumannii
Acinetobacter_baumannii_NBRC_110489	Acinetobacter_baumannii_ATCC_19606	97.5391	Acinetobacter baumannii
Acinetobacter_baumannii_MCR10179	Acinetobacter_baumannii_DSM_30007	97.5394	Acinetobacter baumannii
Acinetobacter_baumannii_Abau851	Acinetobacter_baumannii_DSM_30007	97.5402	Acinetobacter baumannii
Acinetobacter_indicus_AI21	Acinetobacter_indicus_CIP_110367	97.5403	Acinetobacter indicus
Acinetobacter_baumannii_AB900	Acinetobacter_baumannii_DSM_30007	97.5414	Acinetobacter baumannii
Acinetobacter_baumannii_L13	Acinetobacter_baumannii_ATCC_19606	97.5415	Acinetobacter baumannii
Acinetobacter_baumannii_1293320	Acinetobacter_baumannii_DSM_30007	97.5427	Acinetobacter baumannii
Acinetobacter_baumannii_NIPH_615	Acinetobacter_baumannii_ATCC_19606	97.5437	Acinetobacter baumannii
Acinetobacter_sp._YH12110	Acinetobacter_indicus_CIP_110367	97.5439	Acinetobacter indicus
Acinetobacter_indicus_AI31	Acinetobacter_indicus_CIP_110367	97.5442	Acinetobacter indicus
Acinetobacter_sp._YH12223	Acinetobacter_indicus_CIP_110367	97.5448	Acinetobacter indicus
Acinetobacter_nosocomialis_AC1819	Acinetobacter_nosocomialis_LMG_10619	97.545	Acinetobacter nosocomialis
Acinetobacter_baumannii_AMA4	Acinetobacter_baumannii_DSM_30007	97.5453	Acinetobacter baumannii
Acinetobacter_junii_SC57	Acinetobacter_junii_CIP_64.5	97.5454	Acinetobacter junii
Acinetobacter_baumannii_NIPH_190	Acinetobacter_baumannii_ATCC_19606	97.5457	Acinetobacter baumannii
Acinetobacter_baumannii_GTC_03328	Acinetobacter_baumannii_ATCC_19606	97.5462	Acinetobacter baumannii
Acinetobacter_baumannii_PR388	Acinetobacter_baumannii_DSM_30007	97.5475	Acinetobacter baumannii
Acinetobacter_baumannii_J15	Acinetobacter_baumannii_DSM_30007	97.5478	Acinetobacter baumannii
Acinetobacter_haemolyticus_AN54	Acinetobacter_haemolyticus_MTCC_9819	97.5487	Acinetobacter haemolyticus
Acinetobacter_baumannii_CIAT758	Acinetobacter_baumannii_DSM_30007	97.5488	Acinetobacter baumannii
Acinetobacter_baumannii_ABBL071	Acinetobacter_baumannii_ATCC_19606	97.5488	Acinetobacter baumannii
Acinetobacter_baumannii_Pesh-37	Acinetobacter_baumannii_DSM_30007	97.5489	Acinetobacter baumannii
Acinetobacter_baumannii_161600	Acinetobacter_baumannii_DSM_30007	97.5493	Acinetobacter baumannii
Acinetobacter_baumannii_ABBL052	Acinetobacter_baumannii_DSM_30007	97.5494	Acinetobacter baumannii
Acinetobacter_sp._YH12100	Acinetobacter_pseudolwoffii_ANC_5044	97.5496	Acinetobacter pseudolwoffii
Acinetobacter_baumannii_MC3	Acinetobacter_baumannii_DSM_30007	97.5501	Acinetobacter baumannii
Acinetobacter_baumannii_Ab-C102	Acinetobacter_baumannii_ATCC_19606	97.5502	Acinetobacter baumannii
Acinetobacter_baumannii_4300STDY7045845	Acinetobacter_baumannii_ATCC_19606	97.5503	Acinetobacter baumannii
Acinetobacter_baumannii_LAC4	Acinetobacter_baumannii_DSM_30007	97.5503	Acinetobacter baumannii
Acinetobacter_baumannii_872_16	Acinetobacter_baumannii_DSM_30007	97.5504	Acinetobacter baumannii
Acinetobacter_baumannii_4300STDY7045885	Acinetobacter_baumannii_JCM_6841	97.5513	Acinetobacter baumannii
Acinetobacter_baumannii_AMA42	Acinetobacter_baumannii_DSM_30007	97.5515	Acinetobacter baumannii
Acinetobacter_baumannii_1262761-105	Acinetobacter_baumannii_DSM_30007	97.5518	Acinetobacter baumannii
Acinetobacter_baumannii_TG31299	Acinetobacter_baumannii_ATCC_19606	97.5524	Acinetobacter baumannii
Acinetobacter_nosocomialis_UBA6568	Acinetobacter_nosocomialis_LMG_10619	97.5529	Acinetobacter nosocomialis
Acinetobacter_baumannii_J9	Acinetobacter_baumannii_DSM_30007	97.5541	Acinetobacter baumannii
Acinetobacter_baumannii_AR_0088	Acinetobacter_baumannii_DSM_30007	97.5544	Acinetobacter baumannii
Acinetobacter_baumannii_547_16	Acinetobacter_baumannii_ATCC_19606	97.5546	Acinetobacter baumannii
Acinetobacter_baumannii_IHIT38008	Acinetobacter_baumannii_DSM_30007	97.5548	Acinetobacter baumannii
Acinetobacter_baumannii_A4	Acinetobacter_baumannii_DSM_30007	97.5553	Acinetobacter baumannii
Acinetobacter_ursingii_FDAARGOS_1096	Acinetobacter_ursingii_DSM_16037	97.5563	Acinetobacter ursingii
Acinetobacter_pittii_YMC2013_3_R2081	Acinetobacter_pittii_ATCC_19004	97.5563	Acinetobacter pittii
Acinetobacter_baumannii_UH392_536	Acinetobacter_baumannii_DSM_30007	97.5565	Acinetobacter baumannii
Acinetobacter_indicus_AI16	Acinetobacter_indicus_CIP_110367	97.5567	Acinetobacter indicus
Acinetobacter_baumannii_15A835	Acinetobacter_baumannii_ATCC_19606	97.5568	Acinetobacter baumannii
Acinetobacter_baumannii_AMA8	Acinetobacter_baumannii_DSM_30007	97.557	Acinetobacter baumannii
Acinetobacter_sp._ANC_5324	Acinetobacter_pseudolwoffii_ANC_5044	97.5575	Acinetobacter pseudolwoffii
Acinetobacter_baumannii_212_16	Acinetobacter_baumannii_ATCC_19606	97.5579	Acinetobacter baumannii
Acinetobacter_baumannii_MRSN17593	Acinetobacter_baumannii_ATCC_19606	97.5583	Acinetobacter baumannii
Acinetobacter_baumannii_CCBH28244	Acinetobacter_baumannii_ATCC_19606	97.5592	Acinetobacter baumannii
Acinetobacter_baumannii_MCR9238	Acinetobacter_baumannii_DSM_30007	97.5601	Acinetobacter baumannii
Acinetobacter_baumannii_MRSN17592	Acinetobacter_baumannii_JCM_6841	97.5604	Acinetobacter baumannii
Acinetobacter_venetianus_JKSF02	Acinetobacter_venetianus_RAG-1	97.5605	Acinetobacter venetianus
Acinetobacter_baumannii_NIPH_410	Acinetobacter_baumannii_DSM_30007	97.561	Acinetobacter baumannii
Acinetobacter_baumannii_219_ABAU	Acinetobacter_baumannii_DSM_30007	97.5611	Acinetobacter baumannii
Acinetobacter_baumannii_ZQ10	Acinetobacter_baumannii_DSM_30007	97.5612	Acinetobacter baumannii
Acinetobacter_baumannii_ABBL044	Acinetobacter_baumannii_DSM_30007	97.5615	Acinetobacter baumannii
Acinetobacter_baumannii_18A2070	Acinetobacter_baumannii_DSM_30007	97.562	Acinetobacter baumannii
Acinetobacter_baumannii_MRSN14237	Acinetobacter_baumannii_DSM_30007	97.5626	Acinetobacter baumannii
Acinetobacter_baumannii_H008	Acinetobacter_baumannii_DSM_30007	97.5626	Acinetobacter baumannii
Acinetobacter_sp._YH12200	Acinetobacter_pseudolwoffii_ANC_5044	97.5629	Acinetobacter pseudolwoffii
Acinetobacter_baumannii_C1T1-3	Acinetobacter_baumannii_DSM_30007	97.5631	Acinetobacter baumannii
Acinetobacter_baumannii_ABUH537	Acinetobacter_baumannii_ATCC_19606	97.5636	Acinetobacter baumannii
Acinetobacter_baumannii_768_16	Acinetobacter_baumannii_ATCC_19606	97.5637	Acinetobacter baumannii
Acinetobacter_baumannii_MRSN31461	Acinetobacter_baumannii_ATCC_19606	97.5647	Acinetobacter baumannii
Acinetobacter_baumannii_Aci00866	Acinetobacter_baumannii_DSM_30007	97.565	Acinetobacter baumannii
Acinetobacter_nosocomialis_AC1631	Acinetobacter_nosocomialis_NIPH_2119	97.5654	Acinetobacter nosocomialis
Acinetobacter_baumannii_34301	Acinetobacter_baumannii_ATCC_19606	97.5658	Acinetobacter baumannii
Acinetobacter_baumannii_4300STDY7045852	Acinetobacter_baumannii_ATCC_19606	97.5662	Acinetobacter baumannii
Acinetobacter_baumannii_Ab106	Acinetobacter_baumannii_DSM_30007	97.5664	Acinetobacter baumannii
Acinetobacter_baumannii_BA996	Acinetobacter_baumannii_ATCC_19606	97.5674	Acinetobacter baumannii
Acinetobacter_baumannii_PM193665	Acinetobacter_baumannii_ATCC_19606	97.5674	Acinetobacter baumannii
Acinetobacter_baumannii_MC18	Acinetobacter_baumannii_DSM_30007	97.5679	Acinetobacter baumannii
Acinetobacter_sp._478810	Acinetobacter_pittii_ATCC_19004	97.5682	Acinetobacter pittii
Acinetobacter_baumannii_ABAY14008	Acinetobacter_baumannii_DSM_30007	97.5684	Acinetobacter baumannii
Acinetobacter_baumannii_AMA46	Acinetobacter_baumannii_ATCC_19606	97.5686	Acinetobacter baumannii
Acinetobacter_baumannii_Naval-82	Acinetobacter_baumannii_DSM_30007	97.5696	Acinetobacter baumannii
Acinetobacter_pittii_AB33	Acinetobacter_pittii_ATCC_19004	97.572	Acinetobacter pittii
Acinetobacter_baumannii_1007214	Acinetobacter_baumannii_CIP_70.34	97.5722	Acinetobacter baumannii
Acinetobacter_baumannii_ARLG1872	Acinetobacter_baumannii_ATCC_19606	97.5727	Acinetobacter baumannii
Acinetobacter_baumannii_T12	Acinetobacter_baumannii_CIP_70.34	97.573	Acinetobacter baumannii
Acinetobacter_baumannii_MRSN16898	Acinetobacter_baumannii_ATCC_19606	97.5737	Acinetobacter baumannii
Acinetobacter_baumannii_211_16	Acinetobacter_baumannii_ATCC_19606	97.5748	Acinetobacter baumannii
Acinetobacter_sp._18QD2AZ41W	Acinetobacter_pseudolwoffii_ANC_5044	97.5752	Acinetobacter pseudolwoffii
Acinetobacter_baumannii_SP4955	Acinetobacter_baumannii_DSM_30007	97.5753	Acinetobacter baumannii
Acinetobacter_baumannii_TUM16643	Acinetobacter_baumannii_DSM_30007	97.5763	Acinetobacter baumannii
Acinetobacter_baumannii_Ab376	Acinetobacter_baumannii_JCM_6841	97.5763	Acinetobacter baumannii
Acinetobacter_baumannii_P630	Acinetobacter_baumannii_DSM_30007	97.5765	Acinetobacter baumannii
Acinetobacter_baumannii_Aci00848	Acinetobacter_baumannii_DSM_30007	97.5766	Acinetobacter baumannii
Acinetobacter_baumannii_3390	Acinetobacter_baumannii_ATCC_19606	97.5777	Acinetobacter baumannii
Acinetobacter_baumannii_107m	Acinetobacter_baumannii_DSM_30007	97.5778	Acinetobacter baumannii
Acinetobacter_baumannii_A-71.192	Acinetobacter_baumannii_DSM_30007	97.5794	Acinetobacter baumannii
Acinetobacter_baumannii_170876	Acinetobacter_baumannii_DSM_30007	97.5799	Acinetobacter baumannii
Acinetobacter_baumannii_PM4229	Acinetobacter_baumannii_DSM_30007	97.5801	Acinetobacter baumannii
Acinetobacter_baumannii_ABAY14004	Acinetobacter_baumannii_DSM_30007	97.5821	Acinetobacter baumannii
Acinetobacter_sp._C15	Acinetobacter_indicus_CIP_110367	97.5821	Acinetobacter indicus
Acinetobacter_baumannii_MRSN30885	Acinetobacter_baumannii_CIP_70.34	97.5822	Acinetobacter baumannii
Acinetobacter_baumannii_4300STDY7045886	Acinetobacter_baumannii_DSM_30007	97.5822	Acinetobacter baumannii
Acinetobacter_baumannii_RB-1399	Acinetobacter_baumannii_DSM_30007	97.5822	Acinetobacter baumannii
Acinetobacter_baumannii_OIFC111	Acinetobacter_baumannii_DSM_30007	97.5825	Acinetobacter baumannii
Acinetobacter_baumannii_ABNIH28	Acinetobacter_baumannii_DSM_30007	97.5825	Acinetobacter baumannii
Acinetobacter_baumannii_MRSN31159	Acinetobacter_baumannii_ATCC_19606	97.5825	Acinetobacter baumannii
Acinetobacter_baumannii_MC102	Acinetobacter_baumannii_DSM_30007	97.5825	Acinetobacter baumannii
Acinetobacter_baumannii_MC104	Acinetobacter_baumannii_DSM_30007	97.5833	Acinetobacter baumannii
Acinetobacter_nosocomialis_6411	Acinetobacter_nosocomialis_LMG_10619	97.5837	Acinetobacter nosocomialis
Acinetobacter_pittii_ACIN00247	Acinetobacter_pittii_DSM_25618	97.5837	Acinetobacter pittii
Acinetobacter_baumannii_ABF9692	Acinetobacter_baumannii_DSM_30007	97.5845	Acinetobacter baumannii
Acinetobacter_sp._YH12208	Acinetobacter_pseudolwoffii_ANC_5044	97.5847	Acinetobacter pseudolwoffii
Acinetobacter_sp._YH12113	Acinetobacter_indicus_CIP_110367	97.5857	Acinetobacter indicus
Acinetobacter_baumannii_AB18PR065	Acinetobacter_baumannii_ATCC_19606	97.5858	Acinetobacter baumannii
Acinetobacter_baumannii_MRSN15088	Acinetobacter_baumannii_DSM_30007	97.5863	Acinetobacter baumannii
Acinetobacter_baumannii_CriePir307	Acinetobacter_baumannii_ATCC_19606	97.5871	Acinetobacter baumannii
Acinetobacter_baumannii_AB5256	Acinetobacter_baumannii_DSM_30007	97.5871	Acinetobacter baumannii
Acinetobacter_pittii_FDAARGOS_1398	Acinetobacter_lactucae_NRRL_B-41902	97.5872	Acinetobacter lactucae
Acinetobacter_baumannii_SH40	Acinetobacter_baumannii_DSM_30007	97.5876	Acinetobacter baumannii
Acinetobacter_nosocomialis_AC1564	Acinetobacter_nosocomialis_NIPH_2119	97.5877	Acinetobacter nosocomialis
Acinetobacter_baumannii_Ab-C63	Acinetobacter_baumannii_ATCC_19606	97.5879	Acinetobacter baumannii
Acinetobacter_baumannii_PM194188	Acinetobacter_baumannii_ATCC_19606	97.588	Acinetobacter baumannii
Acinetobacter_baumannii_ABUH428	Acinetobacter_baumannii_DSM_30007	97.5883	Acinetobacter baumannii
Acinetobacter_baumannii_MRSN7113	Acinetobacter_baumannii_JCM_6841	97.5883	Acinetobacter baumannii
Acinetobacter_baumannii_ABOB15	Acinetobacter_baumannii_DSM_30007	97.5887	Acinetobacter baumannii
Acinetobacter_baumannii_AR_0033	Acinetobacter_baumannii_ATCC_19606	97.5892	Acinetobacter baumannii
Acinetobacter_baumannii_TG22158	Acinetobacter_baumannii_ATCC_19606	97.5898	Acinetobacter baumannii
Acinetobacter_nosocomialis_2010S01-197	Acinetobacter_nosocomialis_NIPH_2119	97.5899	Acinetobacter nosocomialis
Acinetobacter_baumannii_MC78	Acinetobacter_baumannii_DSM_30007	97.5901	Acinetobacter baumannii
Acinetobacter_baumannii_MCR10172	Acinetobacter_baumannii_ATCC_19606	97.5912	Acinetobacter baumannii
Acinetobacter_baumannii_LUH_6220	Acinetobacter_baumannii_DSM_30007	97.5913	Acinetobacter baumannii
Acinetobacter_baumannii_PR389	Acinetobacter_baumannii_DSM_30007	97.5916	Acinetobacter baumannii
Acinetobacter_baumannii_ABAY14002	Acinetobacter_baumannii_DSM_30007	97.5921	Acinetobacter baumannii
Acinetobacter_baumannii_LHC22-2	Acinetobacter_baumannii_CIP_70.34	97.5927	Acinetobacter baumannii
Acinetobacter_baumannii_50595	Acinetobacter_baumannii_ATCC_19606	97.5927	Acinetobacter baumannii
Acinetobacter_baumannii_NIPH_601	Acinetobacter_baumannii_DSM_30007	97.5937	Acinetobacter baumannii
Acinetobacter_baumannii_398_16	Acinetobacter_baumannii_JCM_6841	97.5937	Acinetobacter baumannii
Acinetobacter_baumannii_ABAY10003	Acinetobacter_baumannii_DSM_30007	97.5938	Acinetobacter baumannii
Acinetobacter_pittii_UKK-0544	Acinetobacter_pittii_DSM_25618	97.5941	Acinetobacter pittii
Acinetobacter_baumannii_172315	Acinetobacter_baumannii_DSM_30007	97.5942	Acinetobacter baumannii
Acinetobacter_baumannii_ACIN00211	Acinetobacter_baumannii_CIP_70.34	97.5948	Acinetobacter baumannii
Acinetobacter_baumannii_17A1882	Acinetobacter_baumannii_DSM_30007	97.5951	Acinetobacter baumannii
Acinetobacter_baumannii_SH37	Acinetobacter_baumannii_ATCC_19606	97.5954	Acinetobacter baumannii
Acinetobacter_baumannii_45075_4	Acinetobacter_baumannii_ATCC_19606	97.5956	Acinetobacter baumannii
Acinetobacter_sp._YH12114	Acinetobacter_indicus_CIP_110367	97.5956	Acinetobacter indicus
Acinetobacter_baumannii_MC44	Acinetobacter_baumannii_DSM_30007	97.5959	Acinetobacter baumannii
Acinetobacter_baumannii_MRSN7137	Acinetobacter_baumannii_JCM_6841	97.5962	Acinetobacter baumannii
Acinetobacter_baumannii_PM2098	Acinetobacter_baumannii_ATCC_19606	97.5963	Acinetobacter baumannii
Acinetobacter_baumannii_MRSN16882	Acinetobacter_baumannii_ATCC_19606	97.5965	Acinetobacter baumannii
Acinetobacter_baumannii_4300STDY7045851	Acinetobacter_baumannii_ATCC_19606	97.5969	Acinetobacter baumannii
Acinetobacter_baumannii_ABUH518	Acinetobacter_baumannii_ATCC_19606	97.5969	Acinetobacter baumannii
Acinetobacter_baumannii_ABBL038	Acinetobacter_baumannii_DSM_30007	97.597	Acinetobacter baumannii
Acinetobacter_baumannii_NIPH_335	Acinetobacter_baumannii_DSM_30007	97.5973	Acinetobacter baumannii
Acinetobacter_pittii_PR318	Acinetobacter_pittii_DSM_25618	97.5973	Acinetobacter pittii
Acinetobacter_baumannii_MC50	Acinetobacter_baumannii_DSM_30007	97.5985	Acinetobacter baumannii
Acinetobacter_baumannii_Ab-B004d-c	Acinetobacter_baumannii_DSM_30007	97.5985	Acinetobacter baumannii
Acinetobacter_baumannii_VB35435	Acinetobacter_baumannii_ATCC_19606	97.5986	Acinetobacter baumannii
Acinetobacter_baumannii_UBA3169	Acinetobacter_baumannii_ATCC_19606	97.5987	Acinetobacter baumannii
Acinetobacter_baumannii_D4	Acinetobacter_baumannii_DSM_30007	97.5988	Acinetobacter baumannii
Acinetobacter_indicus_HY20	Acinetobacter_indicus_CIP_110367	97.6002	Acinetobacter indicus
Acinetobacter_baumannii_MRSN16901	Acinetobacter_baumannii_ATCC_19606	97.6005	Acinetobacter baumannii
Acinetobacter_baumannii_OCU_Ac11	Acinetobacter_baumannii_DSM_30007	97.6006	Acinetobacter baumannii
Acinetobacter_baumannii_Naval-72	Acinetobacter_baumannii_DSM_30007	97.6012	Acinetobacter baumannii
Acinetobacter_baumannii_L070	Acinetobacter_baumannii_DSM_30007	97.6025	Acinetobacter baumannii
Acinetobacter_baumannii_MRSN16881	Acinetobacter_baumannii_JCM_6841	97.6027	Acinetobacter baumannii
Acinetobacter_sp._YH1901141	Acinetobacter_towneri_DSM_14962	97.6035	Acinetobacter towneri
Acinetobacter_baumannii_SQ017	Acinetobacter_baumannii_DSM_30007	97.6037	Acinetobacter baumannii
Acinetobacter_towneri_GX7	Acinetobacter_towneri_DSM_14962	97.6037	Acinetobacter towneri
Acinetobacter_nosocomialis_162085	Acinetobacter_nosocomialis_NIPH_2119	97.6038	Acinetobacter nosocomialis
Acinetobacter_sp._YH12117	Acinetobacter_indicus_CIP_110367	97.6045	Acinetobacter indicus
Acinetobacter_baumannii_MC31	Acinetobacter_baumannii_DSM_30007	97.6048	Acinetobacter baumannii
Acinetobacter_baumannii_ABBL055	Acinetobacter_baumannii_JCM_6841	97.605	Acinetobacter baumannii
Acinetobacter_indicus_AI23	Acinetobacter_indicus_CIP_110367	97.6063	Acinetobacter indicus
Acinetobacter_baumannii_ARLG1871	Acinetobacter_baumannii_ATCC_19606	97.6063	Acinetobacter baumannii
Acinetobacter_baumannii_ABE27_M	Acinetobacter_baumannii_DSM_30007	97.6064	Acinetobacter baumannii
Acinetobacter_baumannii_ACIN00266	Acinetobacter_baumannii_DSM_30007	97.6064	Acinetobacter baumannii
Acinetobacter_baumannii_PM3665	Acinetobacter_baumannii_DSM_30007	97.6064	Acinetobacter baumannii
Acinetobacter_baumannii_ABBL072	Acinetobacter_baumannii_ATCC_19606	97.6068	Acinetobacter baumannii
Acinetobacter_baumannii_Aci00717	Acinetobacter_baumannii_DSM_30007	97.6072	Acinetobacter baumannii
Acinetobacter_baumannii_SP1917	Acinetobacter_baumannii_DSM_30007	97.6075	Acinetobacter baumannii
Acinetobacter_baumannii_AB_2008-15-69	Acinetobacter_baumannii_DSM_30007	97.6075	Acinetobacter baumannii
Acinetobacter_baumannii_KCRI-123C	Acinetobacter_baumannii_JCM_6841	97.6078	Acinetobacter baumannii
Acinetobacter_baumannii_R1B	Acinetobacter_baumannii_DSM_30007	97.6078	Acinetobacter baumannii
Acinetobacter_baumannii_ABBL014	Acinetobacter_baumannii_ATCC_19606	97.6082	Acinetobacter baumannii
Acinetobacter_sp._YH12111	Acinetobacter_indicus_CIP_110367	97.6085	Acinetobacter indicus
Acinetobacter_baumannii_15946	Acinetobacter_baumannii_DSM_30007	97.6087	Acinetobacter baumannii
Acinetobacter_baumannii_BAL_255	Acinetobacter_baumannii_ATCC_19606	97.6089	Acinetobacter baumannii
Acinetobacter_sp._YH12224	Acinetobacter_indicus_CIP_110367	97.6092	Acinetobacter indicus
Acinetobacter_indicus_AI24	Acinetobacter_indicus_CIP_110367	97.6096	Acinetobacter indicus
Acinetobacter_baumannii_4390	Acinetobacter_baumannii_DSM_30007	97.6096	Acinetobacter baumannii
Acinetobacter_junii_SC54	Acinetobacter_junii_CIP_64.5	97.6099	Acinetobacter junii
Acinetobacter_sp._YH12237	Acinetobacter_towneri_DSM_14962	97.6103	Acinetobacter towneri
Acinetobacter_baumannii_ABBL067k	Acinetobacter_baumannii_JCM_6841	97.6112	Acinetobacter baumannii
Acinetobacter_baumannii_ABBL043	Acinetobacter_baumannii_ATCC_19606	97.6114	Acinetobacter baumannii
Acinetobacter_baumannii_EGD-HP18	Acinetobacter_baumannii_DSM_30007	97.612	Acinetobacter baumannii
Acinetobacter_baumannii_UMB003	Acinetobacter_baumannii_DSM_30007	97.612	Acinetobacter baumannii
Acinetobacter_sp._YH12254	Acinetobacter_pseudolwoffii_ANC_5044	97.6121	Acinetobacter pseudolwoffii
Acinetobacter_baumannii_B30	Acinetobacter_baumannii_DSM_30007	97.613	Acinetobacter baumannii
Acinetobacter_baumannii_YMC2012_9_R2209	Acinetobacter_baumannii_DSM_30007	97.613	Acinetobacter baumannii
Acinetobacter_baumannii_PM4122	Acinetobacter_baumannii_DSM_30007	97.6133	Acinetobacter baumannii
Acinetobacter_sp._FDAARGOS_724	Acinetobacter_variabilis_NIPH_2171	97.6133	Acinetobacter variabilis
Acinetobacter_baumannii_CCBH27270	Acinetobacter_baumannii_ATCC_19606	97.6134	Acinetobacter baumannii
Acinetobacter_baumannii_R2091	Acinetobacter_baumannii_DSM_30007	97.6135	Acinetobacter baumannii
Acinetobacter_baumannii_B8300	Acinetobacter_baumannii_DSM_30007	97.6137	Acinetobacter baumannii
Acinetobacter_baumannii_XH827	Acinetobacter_baumannii_ATCC_19606	97.6139	Acinetobacter baumannii
Acinetobacter_baumannii_Ab-D10a-a	Acinetobacter_baumannii_DSM_30007	97.6141	Acinetobacter baumannii
Acinetobacter_baumannii_MRSN16880	Acinetobacter_baumannii_DSM_30007	97.6143	Acinetobacter baumannii
Acinetobacter_baumannii_SP2128	Acinetobacter_baumannii_DSM_30007	97.6147	Acinetobacter baumannii
Acinetobacter_ursingii_ANC_3649	Acinetobacter_ursingii_DSM_16037	97.6153	Acinetobacter ursingii
Acinetobacter_nosocomialis_MGYG-HGUT-02345	Acinetobacter_nosocomialis_LMG_10619	97.6161	Acinetobacter nosocomialis
Acinetobacter_sp._766875	Acinetobacter_nosocomialis_LMG_10619	97.6161	Acinetobacter nosocomialis
Acinetobacter_pittii_UKK-0551	Acinetobacter_pittii_DSM_25618	97.6162	Acinetobacter pittii
Acinetobacter_baumannii_ACN21	Acinetobacter_baumannii_ATCC_19606	97.6163	Acinetobacter baumannii
Acinetobacter_baumannii_Aci00859	Acinetobacter_baumannii_DSM_30007	97.6183	Acinetobacter baumannii
Acinetobacter_baumannii_LAC-4	Acinetobacter_baumannii_DSM_30007	97.6184	Acinetobacter baumannii
Acinetobacter_baumannii_IHIT17966	Acinetobacter_baumannii_ATCC_19606	97.6184	Acinetobacter baumannii
Acinetobacter_sp._YH16058	Acinetobacter_towneri_DSM_14962	97.6191	Acinetobacter towneri
Acinetobacter_baumannii_AB030	Acinetobacter_baumannii_ATCC_19606	97.6193	Acinetobacter baumannii
Acinetobacter_pittii_ARLG1776	Acinetobacter_pittii_DSM_25618	97.6193	Acinetobacter pittii
Acinetobacter_baumannii_NM3	Acinetobacter_baumannii_DSM_30007	97.6196	Acinetobacter baumannii
Acinetobacter_baumannii_RCH52	Acinetobacter_baumannii_ATCC_19606	97.6197	Acinetobacter baumannii
Acinetobacter_baumannii_A369	Acinetobacter_baumannii_CIP_70.34	97.6203	Acinetobacter baumannii
Acinetobacter_baumannii_MRSN16896	Acinetobacter_baumannii_JCM_6841	97.6203	Acinetobacter baumannii
Acinetobacter_baumannii_372_16	Acinetobacter_baumannii_DSM_30007	97.6205	Acinetobacter baumannii
Acinetobacter_baumannii_CIP70.10	Acinetobacter_baumannii_JCM_6841	97.6208	Acinetobacter baumannii
Acinetobacter_nosocomialis_UBA6823	Acinetobacter_nosocomialis_NIPH_2119	97.6212	Acinetobacter nosocomialis
Acinetobacter_pittii_42F	Acinetobacter_pittii_ATCC_19004	97.6214	Acinetobacter pittii
Acinetobacter_baumannii_KAB15	Acinetobacter_baumannii_DSM_30007	97.6216	Acinetobacter baumannii
Acinetobacter_baumannii_1276470-86	Acinetobacter_baumannii_DSM_30007	97.6218	Acinetobacter baumannii
Acinetobacter_baumannii_BJ4	Acinetobacter_baumannii_DSM_30007	97.622	Acinetobacter baumannii
Acinetobacter_baumannii_SP1561	Acinetobacter_baumannii_DSM_30007	97.6221	Acinetobacter baumannii
Acinetobacter_baumannii_ARLG1880	Acinetobacter_baumannii_ATCC_19606	97.6224	Acinetobacter baumannii
Acinetobacter_baumannii_MCR10126	Acinetobacter_baumannii_DSM_30007	97.6225	Acinetobacter baumannii
Acinetobacter_baumannii_ABBL030	Acinetobacter_baumannii_ATCC_19606	97.6227	Acinetobacter baumannii
Acinetobacter_baumannii_CAb-65	Acinetobacter_baumannii_ATCC_19606	97.623	Acinetobacter baumannii
Acinetobacter_baumannii_G	Acinetobacter_baumannii_DSM_30007	97.6231	Acinetobacter baumannii
Acinetobacter_sp._ABNIH27	Acinetobacter_baumannii_JCM_6841	97.6236	Acinetobacter baumannii
Acinetobacter_junii_TUM15553	Acinetobacter_junii_CIP_64.5	97.6238	Acinetobacter junii
Acinetobacter_baumannii_PR360	Acinetobacter_baumannii_JCM_6841	97.6239	Acinetobacter baumannii
Acinetobacter_sp._OIFC021	Acinetobacter_nosocomialis_LMG_10619	97.6244	Acinetobacter nosocomialis
Acinetobacter_sp._1566109	Acinetobacter_nosocomialis_NIPH_2119	97.6248	Acinetobacter nosocomialis
Acinetobacter_baumannii_XH639	Acinetobacter_baumannii_ATCC_19606	97.6251	Acinetobacter baumannii
Acinetobacter_baumannii_KPC-SM-17a	Acinetobacter_baumannii_DSM_30007	97.6254	Acinetobacter baumannii
Acinetobacter_baumannii_CCBH27628	Acinetobacter_baumannii_DSM_30007	97.6259	Acinetobacter baumannii
Acinetobacter_baumannii_XH693	Acinetobacter_baumannii_ATCC_19606	97.6269	Acinetobacter baumannii
Acinetobacter_baumannii_OCU_Ac10	Acinetobacter_baumannii_DSM_30007	97.6272	Acinetobacter baumannii
Acinetobacter_baumannii_MC89	Acinetobacter_baumannii_DSM_30007	97.6273	Acinetobacter baumannii
Acinetobacter_baumannii_KCRI-309C	Acinetobacter_baumannii_ATCC_19606	97.6282	Acinetobacter baumannii
Acinetobacter_baumannii_17A1625	Acinetobacter_baumannii_ATCC_19606	97.6283	Acinetobacter baumannii
Acinetobacter_baumannii_NCSR_132	Acinetobacter_baumannii_DSM_30007	97.6285	Acinetobacter baumannii
Acinetobacter_baumannii_ABBL011	Acinetobacter_baumannii_CIP_70.34	97.6289	Acinetobacter baumannii
Acinetobacter_baumannii_KCRI-116	Acinetobacter_baumannii_JCM_6841	97.6294	Acinetobacter baumannii
Acinetobacter_baumannii_MRSN16897	Acinetobacter_baumannii_ATCC_19606	97.6294	Acinetobacter baumannii
Acinetobacter_baumannii_ARLG1864	Acinetobacter_baumannii_DSM_30007	97.6298	Acinetobacter baumannii
Acinetobacter_baumannii_214216	Acinetobacter_baumannii_ATCC_19606	97.6299	Acinetobacter baumannii
Acinetobacter_baumannii_763_16	Acinetobacter_baumannii_DSM_30007	97.63	Acinetobacter baumannii
Acinetobacter_baumannii_299505	Acinetobacter_baumannii_DSM_30007	97.6303	Acinetobacter baumannii
Acinetobacter_baumannii_6200	Acinetobacter_baumannii_DSM_30007	97.6305	Acinetobacter baumannii
Acinetobacter_baumannii_ABBL067	Acinetobacter_baumannii_ATCC_19606	97.6307	Acinetobacter baumannii
Acinetobacter_baumannii_MRSN11695	Acinetobacter_baumannii_DSM_30007	97.6315	Acinetobacter baumannii
Acinetobacter_pittii_PR346	Acinetobacter_pittii_DSM_25618	97.6315	Acinetobacter pittii
Acinetobacter_baumannii_B8342	Acinetobacter_baumannii_ATCC_19606	97.6317	Acinetobacter baumannii
Acinetobacter_pittii_IHIT29592	Acinetobacter_pittii_DSM_25618	97.6318	Acinetobacter pittii
Acinetobacter_baumannii_SP2210	Acinetobacter_baumannii_DSM_30007	97.6318	Acinetobacter baumannii
Acinetobacter_baumannii_PR333	Acinetobacter_baumannii_DSM_30007	97.6323	Acinetobacter baumannii
Acinetobacter_baumannii_AE3M	Acinetobacter_baumannii_ATCC_19606	97.6323	Acinetobacter baumannii
Acinetobacter_baumannii_MRSN15574	Acinetobacter_baumannii_DSM_30007	97.6324	Acinetobacter baumannii
Acinetobacter_sp._YH12222	Acinetobacter_indicus_CIP_110367	97.6329	Acinetobacter indicus
Acinetobacter_baumannii_3159	Acinetobacter_baumannii_DSM_30007	97.6336	Acinetobacter baumannii
Acinetobacter_baumannii_PR340	Acinetobacter_baumannii_DSM_30007	97.6342	Acinetobacter baumannii
Acinetobacter_sp._YH12252	Acinetobacter_towneri_DSM_14962	97.6347	Acinetobacter towneri
Acinetobacter_baumannii_MRSN1551	Acinetobacter_baumannii_DSM_30007	97.6349	Acinetobacter baumannii
Acinetobacter_baumannii_MC100	Acinetobacter_baumannii_DSM_30007	97.6352	Acinetobacter baumannii
Acinetobacter_baumannii_4300STDY7045700	Acinetobacter_baumannii_DSM_30007	97.6357	Acinetobacter baumannii
Acinetobacter_ursingii_MGYG-HGUT-02341	Acinetobacter_ursingii_DSM_16037	97.6366	Acinetobacter ursingii
Acinetobacter_sp._479375	Acinetobacter_ursingii_DSM_16037	97.6366	Acinetobacter ursingii
Acinetobacter_baumannii_4300STDY7045872	Acinetobacter_baumannii_ATCC_19606	97.6368	Acinetobacter baumannii
Acinetobacter_baumannii_Lah-14	Acinetobacter_baumannii_DSM_30007	97.6368	Acinetobacter baumannii
Acinetobacter_baumannii_TG87880	Acinetobacter_baumannii_DSM_30007	97.6378	Acinetobacter baumannii
Acinetobacter_baumannii_K	Acinetobacter_baumannii_DSM_30007	97.6378	Acinetobacter baumannii
Acinetobacter_baumannii_ACIN00236	Acinetobacter_baumannii_DSM_30007	97.6379	Acinetobacter baumannii
Acinetobacter_baumannii_KCRI-186	Acinetobacter_baumannii_DSM_30007	97.638	Acinetobacter baumannii
Acinetobacter_baumannii_1170863	Acinetobacter_baumannii_DSM_30007	97.6387	Acinetobacter baumannii
Acinetobacter_baumannii_MC22	Acinetobacter_baumannii_DSM_30007	97.6387	Acinetobacter baumannii
Acinetobacter_septicus_FDAARGOS_1401	Acinetobacter_ursingii_DSM_16037	97.6387	Acinetobacter ursingii
Acinetobacter_baumannii_607805	Acinetobacter_baumannii_ATCC_19606	97.639	Acinetobacter baumannii
Acinetobacter_indicus_C15_T	Acinetobacter_indicus_CIP_110367	97.6392	Acinetobacter indicus
Acinetobacter_pittii_AP436	Acinetobacter_pittii_DSM_25618	97.6397	Acinetobacter pittii
Acinetobacter_baumannii_MRSN16875	Acinetobacter_baumannii_ATCC_19606	97.6397	Acinetobacter baumannii
Acinetobacter_baumannii_ABS078	Acinetobacter_baumannii_DSM_30007	97.6401	Acinetobacter baumannii
Acinetobacter_baumannii_1188188	Acinetobacter_baumannii_DSM_30007	97.6404	Acinetobacter baumannii
Acinetobacter_sp._S2_018_000_R2_105	Acinetobacter_ursingii_DSM_16037	97.6406	Acinetobacter ursingii
Acinetobacter_nosocomialis_AC15181	Acinetobacter_nosocomialis_NIPH_2119	97.6408	Acinetobacter nosocomialis
Acinetobacter_baumannii_961_16	Acinetobacter_baumannii_ATCC_19606	97.6414	Acinetobacter baumannii
Acinetobacter_baumannii_UPAB1	Acinetobacter_baumannii_DSM_30007	97.6418	Acinetobacter baumannii
Acinetobacter_indicus_AI32	Acinetobacter_indicus_CIP_110367	97.6421	Acinetobacter indicus
Acinetobacter_baumannii_512_16	Acinetobacter_baumannii_ATCC_19606	97.6423	Acinetobacter baumannii
Acinetobacter_baumannii_162912	Acinetobacter_baumannii_DSM_30007	97.6424	Acinetobacter baumannii
Acinetobacter_baumannii_ABBL067l	Acinetobacter_baumannii_DSM_30007	97.6425	Acinetobacter baumannii
Acinetobacter_baumannii_625974	Acinetobacter_baumannii_ATCC_19606	97.6426	Acinetobacter baumannii
Acinetobacter_baumannii_1121032	Acinetobacter_baumannii_DSM_30007	97.6427	Acinetobacter baumannii
Acinetobacter_baumannii_4300STDY7045882	Acinetobacter_baumannii_DSM_30007	97.6428	Acinetobacter baumannii
Acinetobacter_baumannii_NFAb2	Acinetobacter_baumannii_DSM_30007	97.643	Acinetobacter baumannii
Acinetobacter_baumannii_ACMH-6201	Acinetobacter_baumannii_ATCC_19606	97.643	Acinetobacter baumannii
Acinetobacter_baumannii_XH828	Acinetobacter_baumannii_DSM_30007	97.6432	Acinetobacter baumannii
Acinetobacter_baumannii_29FS20	Acinetobacter_baumannii_ATCC_19606	97.6434	Acinetobacter baumannii
Acinetobacter_baumannii_AB-C	Acinetobacter_baumannii_DSM_30007	97.6437	Acinetobacter baumannii
Acinetobacter_pseudolwoffii_Acilw_F78	Acinetobacter_pseudolwoffii_ANC_5044	97.644	Acinetobacter pseudolwoffii
Acinetobacter_baumannii_LWSS-_03-02-11A	Acinetobacter_baumannii_DSM_30007	97.6441	Acinetobacter baumannii
Acinetobacter_sp._Q22-2	Acinetobacter_indicus_CIP_110367	97.6442	Acinetobacter indicus
Acinetobacter_baumannii_OCU_Ac2	Acinetobacter_baumannii_DSM_30007	97.6442	Acinetobacter baumannii
Acinetobacter_baumannii_MRSN6269	Acinetobacter_baumannii_DSM_30007	97.6451	Acinetobacter baumannii
Acinetobacter_baumannii_1429530	Acinetobacter_baumannii_JCM_6841	97.6452	Acinetobacter baumannii
Acinetobacter_baumannii_KAB25	Acinetobacter_baumannii_CIP_70.34	97.6453	Acinetobacter baumannii
Acinetobacter_baumannii_TG00314	Acinetobacter_baumannii_DSM_30007	97.6458	Acinetobacter baumannii
Acinetobacter_baumannii_ABUH360	Acinetobacter_baumannii_ATCC_19606	97.646	Acinetobacter baumannii
Acinetobacter_sp._NBRC_100985	Acinetobacter_venetianus_RAG-1	97.646	Acinetobacter venetianus
Acinetobacter_baumannii_MC47	Acinetobacter_baumannii_ATCC_19606	97.6464	Acinetobacter baumannii
Acinetobacter_baumannii_MRSN20315	Acinetobacter_baumannii_DSM_30007	97.6468	Acinetobacter baumannii
Acinetobacter_baumannii_Pesh-27	Acinetobacter_baumannii_DSM_30007	97.6476	Acinetobacter baumannii
Acinetobacter_indicus_MMS9-2	Acinetobacter_indicus_CIP_110367	97.6478	Acinetobacter indicus
Acinetobacter_baumannii_C3T1-2	Acinetobacter_baumannii_CIP_70.34	97.6479	Acinetobacter baumannii
Acinetobacter_baumannii_GB1-2	Acinetobacter_baumannii_DSM_30007	97.6484	Acinetobacter baumannii
Acinetobacter_baumannii_36-1512	Acinetobacter_baumannii_DSM_30007	97.6484	Acinetobacter baumannii
Acinetobacter_baumannii_BAL_266	Acinetobacter_baumannii_DSM_30007	97.6486	Acinetobacter baumannii
Acinetobacter_baumannii_ABS201	Acinetobacter_baumannii_DSM_30007	97.6489	Acinetobacter baumannii
Acinetobacter_baumannii_Aci00891	Acinetobacter_baumannii_DSM_30007	97.649	Acinetobacter baumannii
Acinetobacter_baumannii_CCBH27570	Acinetobacter_baumannii_CIP_70.34	97.649	Acinetobacter baumannii
Acinetobacter_baumannii_ICU40	Acinetobacter_baumannii_DSM_30007	97.6495	Acinetobacter baumannii
Acinetobacter_baumannii_MRSN21660	Acinetobacter_baumannii_DSM_30007	97.6495	Acinetobacter baumannii
Acinetobacter_sp._72431	Acinetobacter_pittii_DSM_25618	97.6497	Acinetobacter pittii
Acinetobacter_nosocomialis_UBA2048	Acinetobacter_nosocomialis_NIPH_2119	97.6497	Acinetobacter nosocomialis
Acinetobacter_baumannii_AC1532	Acinetobacter_baumannii_DSM_30007	97.6499	Acinetobacter baumannii
Acinetobacter_baumannii_ABBL037	Acinetobacter_baumannii_DSM_30007	97.65	Acinetobacter baumannii
Acinetobacter_baumannii_ABBL067j	Acinetobacter_baumannii_DSM_30007	97.6502	Acinetobacter baumannii
Acinetobacter_baumannii_B	Acinetobacter_baumannii_DSM_30007	97.6505	Acinetobacter baumannii
Acinetobacter_baumannii_ARLG1326	Acinetobacter_baumannii_DSM_30007	97.6509	Acinetobacter baumannii
Acinetobacter_baumannii_I	Acinetobacter_baumannii_DSM_30007	97.6511	Acinetobacter baumannii
Acinetobacter_baumannii_PR323	Acinetobacter_baumannii_DSM_30007	97.6511	Acinetobacter baumannii
Acinetobacter_baumannii_VB2486	Acinetobacter_baumannii_DSM_30007	97.6514	Acinetobacter baumannii
Acinetobacter_baumannii_1413735	Acinetobacter_baumannii_CIP_70.34	97.6519	Acinetobacter baumannii
Acinetobacter_baumannii_WKA02	Acinetobacter_baumannii_ATCC_19606	97.652	Acinetobacter baumannii
Acinetobacter_pittii_ABBL047	Acinetobacter_pittii_ATCC_19004	97.6521	Acinetobacter pittii
Acinetobacter_baumannii_NIPH_146	Acinetobacter_baumannii_DSM_30007	97.6522	Acinetobacter baumannii
Acinetobacter_baumannii_2011TJAB1	Acinetobacter_baumannii_ATCC_19606	97.6524	Acinetobacter baumannii
Acinetobacter_baumannii_4300STDY7045780	Acinetobacter_baumannii_ATCC_19606	97.6527	Acinetobacter baumannii
Acinetobacter_baumannii_MRSN15038	Acinetobacter_baumannii_ATCC_19606	97.6527	Acinetobacter baumannii
Acinetobacter_pittii_ABBL010	Acinetobacter_pittii_DSM_25618	97.6529	Acinetobacter pittii
Acinetobacter_baumannii_FK_2016_47	Acinetobacter_baumannii_DSM_30007	97.653	Acinetobacter baumannii
Acinetobacter_pittii_UKK-0549	Acinetobacter_pittii_DSM_25618	97.6536	Acinetobacter pittii
Acinetobacter_pittii_IHIT32473	Acinetobacter_pittii_ATCC_19004	97.6536	Acinetobacter pittii
Acinetobacter_baumannii_13	Acinetobacter_baumannii_DSM_30007	97.6539	Acinetobacter baumannii
Acinetobacter_sp._YH12102	Acinetobacter_pseudolwoffii_ANC_5044	97.6539	Acinetobacter pseudolwoffii
Acinetobacter_sp._YH12116	Acinetobacter_indicus_CIP_110367	97.6543	Acinetobacter indicus
Acinetobacter_baumannii_AB-A	Acinetobacter_baumannii_ATCC_19606	97.6546	Acinetobacter baumannii
Acinetobacter_baumannii_Ab127	Acinetobacter_baumannii_DSM_30007	97.6546	Acinetobacter baumannii
Acinetobacter_baumannii_10324	Acinetobacter_baumannii_DSM_30007	97.6548	Acinetobacter baumannii
Acinetobacter_baumannii_S36	Acinetobacter_baumannii_DSM_30007	97.6552	Acinetobacter baumannii
Acinetobacter_baumannii_TYTH-7	Acinetobacter_baumannii_CIP_70.34	97.6554	Acinetobacter baumannii
Acinetobacter_baumannii_466760	Acinetobacter_baumannii_ATCC_19606	97.6555	Acinetobacter baumannii
Acinetobacter_baumannii_KUSSH09	Acinetobacter_baumannii_DSM_30007	97.6556	Acinetobacter baumannii
Acinetobacter_nosocomialis_UBA6008	Acinetobacter_nosocomialis_NIPH_2119	97.6564	Acinetobacter nosocomialis
Acinetobacter_baumannii_ATCC_17945	Acinetobacter_baumannii_DSM_30007	97.6565	Acinetobacter baumannii
Acinetobacter_baumannii_MRSN31523	Acinetobacter_baumannii_DSM_30007	97.6566	Acinetobacter baumannii
Acinetobacter_baumannii_ABBL021	Acinetobacter_baumannii_ATCC_19606	97.6568	Acinetobacter baumannii
Acinetobacter_pittii_PR369	Acinetobacter_pittii_DSM_25618	97.6569	Acinetobacter pittii
Acinetobacter_nosocomialis_AB11	Acinetobacter_nosocomialis_NIPH_2119	97.6575	Acinetobacter nosocomialis
Acinetobacter_baumannii_170714	Acinetobacter_baumannii_DSM_30007	97.6578	Acinetobacter baumannii
Acinetobacter_baumannii_CAM180-1	Acinetobacter_baumannii_CIP_70.34	97.6579	Acinetobacter baumannii
Acinetobacter_baumannii_CCBH26881	Acinetobacter_baumannii_DSM_30007	97.658	Acinetobacter baumannii
Acinetobacter_baumannii_5457	Acinetobacter_baumannii_DSM_30007	97.6584	Acinetobacter baumannii
Acinetobacter_baumannii_A1296	Acinetobacter_baumannii_DSM_30007	97.6588	Acinetobacter baumannii
Acinetobacter_baumannii_ABUH557	Acinetobacter_baumannii_DSM_30007	97.6588	Acinetobacter baumannii
Acinetobacter_baumannii_NFAb1	Acinetobacter_baumannii_ATCC_19606	97.659	Acinetobacter baumannii
Acinetobacter_baumannii_ABUH516	Acinetobacter_baumannii_ATCC_19606	97.6591	Acinetobacter baumannii
Acinetobacter_baumannii_Survcare112	Acinetobacter_baumannii_DSM_30007	97.6595	Acinetobacter baumannii
Acinetobacter_baumannii_93_16	Acinetobacter_baumannii_DSM_30007	97.6596	Acinetobacter baumannii
Acinetobacter_baumannii_2011ZJAB4	Acinetobacter_baumannii_ATCC_19606	97.6599	Acinetobacter baumannii
Acinetobacter_baumannii_DT01139C	Acinetobacter_baumannii_DSM_30007	97.6605	Acinetobacter baumannii
Acinetobacter_baumannii_4300STDY7045850	Acinetobacter_baumannii_DSM_30007	97.6608	Acinetobacter baumannii
Acinetobacter_pittii_IHIT29469	Acinetobacter_pittii_DSM_25618	97.661	Acinetobacter pittii
Acinetobacter_baumannii_AB-B	Acinetobacter_baumannii_DSM_30007	97.6611	Acinetobacter baumannii
Acinetobacter_baumannii_ABAY13016	Acinetobacter_baumannii_DSM_30007	97.6611	Acinetobacter baumannii
Acinetobacter_baumannii_VB16141	Acinetobacter_baumannii_ATCC_19606	97.6614	Acinetobacter baumannii
Acinetobacter_baumannii_AB3927	Acinetobacter_baumannii_DSM_30007	97.6614	Acinetobacter baumannii
Acinetobacter_baumannii_SGH0606	Acinetobacter_baumannii_DSM_30007	97.6617	Acinetobacter baumannii
Acinetobacter_baumannii_MRSN7124	Acinetobacter_baumannii_CIP_70.34	97.662	Acinetobacter baumannii
Acinetobacter_baumannii_NCSR_106	Acinetobacter_baumannii_DSM_30007	97.6626	Acinetobacter baumannii
Acinetobacter_ursingii_TUM15496	Acinetobacter_ursingii_DSM_16037	97.6626	Acinetobacter ursingii
Acinetobacter_baumannii_480175	Acinetobacter_baumannii_DSM_30007	97.6627	Acinetobacter baumannii
Acinetobacter_baumannii_KSK10	Acinetobacter_baumannii_DSM_30007	97.663	Acinetobacter baumannii
Acinetobacter_baumannii_MRSN351524	Acinetobacter_baumannii_CIP_70.34	97.6635	Acinetobacter baumannii
Acinetobacter_baumannii_XH858	Acinetobacter_baumannii_DSM_30007	97.664	Acinetobacter baumannii
Acinetobacter_baumannii_Pulsotype_27	Acinetobacter_baumannii_ATCC_19606	97.6641	Acinetobacter baumannii
Acinetobacter_baumannii_917_16	Acinetobacter_baumannii_DSM_30007	97.6642	Acinetobacter baumannii
Acinetobacter_pittii_AMA2	Acinetobacter_pittii_DSM_25618	97.6648	Acinetobacter pittii
Acinetobacter_baumannii_ABBL041	Acinetobacter_baumannii_DSM_30007	97.6648	Acinetobacter baumannii
Acinetobacter_nosocomialis_KAN02	Acinetobacter_nosocomialis_LMG_10619	97.6651	Acinetobacter nosocomialis
Acinetobacter_baumannii_aba_42acb	Acinetobacter_baumannii_DSM_30007	97.6653	Acinetobacter baumannii
Acinetobacter_baumannii_1237893	Acinetobacter_baumannii_ATCC_19606	97.6657	Acinetobacter baumannii
Acinetobacter_lactucae_TG41018	Acinetobacter_lactucae_NRRL_B-41902	97.6659	Acinetobacter lactucae
Acinetobacter_nosocomialis_TUM15386	Acinetobacter_nosocomialis_LMG_10619	97.6662	Acinetobacter nosocomialis
Acinetobacter_baumannii_CCBH27449	Acinetobacter_baumannii_DSM_30007	97.6663	Acinetobacter baumannii
Acinetobacter_lwoffii_18QD2AZ28W	Acinetobacter_pseudolwoffii_ANC_5044	97.6666	Acinetobacter pseudolwoffii
Acinetobacter_baumannii_J	Acinetobacter_baumannii_DSM_30007	97.667	Acinetobacter baumannii
Acinetobacter_baumannii_ABBL039	Acinetobacter_baumannii_ATCC_19606	97.6673	Acinetobacter baumannii
Acinetobacter_baumannii_MRSN7081	Acinetobacter_baumannii_DSM_30007	97.6674	Acinetobacter baumannii
Acinetobacter_baumannii_OIFC098	Acinetobacter_baumannii_CIP_70.34	97.668	Acinetobacter baumannii
Acinetobacter_baumannii_KSK1	Acinetobacter_baumannii_DSM_30007	97.6681	Acinetobacter baumannii
Acinetobacter_baumannii_RUH1486	Acinetobacter_baumannii_ATCC_19606	97.6683	Acinetobacter baumannii
Acinetobacter_baumannii_KAB27	Acinetobacter_baumannii_DSM_30007	97.6683	Acinetobacter baumannii
Acinetobacter_baumannii_AB-HZ-B04	Acinetobacter_baumannii_ATCC_19606	97.6683	Acinetobacter baumannii
Acinetobacter_nosocomialis_P020	Acinetobacter_nosocomialis_NIPH_2119	97.6684	Acinetobacter nosocomialis
Acinetobacter_baumannii_CU032113	Acinetobacter_baumannii_ATCC_19606	97.6685	Acinetobacter baumannii
Acinetobacter_lactucae_JVAP01	Acinetobacter_lactucae_NRRL_B-41902	97.6686	Acinetobacter lactucae
Acinetobacter_baumannii_42057_6	Acinetobacter_baumannii_DSM_30007	97.6688	Acinetobacter baumannii
Acinetobacter_baumannii_1406589	Acinetobacter_baumannii_DSM_30007	97.6691	Acinetobacter baumannii
Acinetobacter_baumannii_915_16	Acinetobacter_baumannii_DSM_30007	97.6691	Acinetobacter baumannii
Acinetobacter_baumannii_741019	Acinetobacter_baumannii_ATCC_19606	97.6698	Acinetobacter baumannii
Acinetobacter_baumannii_CCBH27135	Acinetobacter_baumannii_ATCC_19606	97.6699	Acinetobacter baumannii
Acinetobacter_baumannii_A5	Acinetobacter_baumannii_DSM_30007	97.6703	Acinetobacter baumannii
Acinetobacter_baumannii_ABUH363	Acinetobacter_baumannii_ATCC_19606	97.6705	Acinetobacter baumannii
Acinetobacter_baumannii_KAB26	Acinetobacter_baumannii_ATCC_19606	97.6706	Acinetobacter baumannii
Acinetobacter_baumannii_A457	Acinetobacter_baumannii_DSM_30007	97.6712	Acinetobacter baumannii
Acinetobacter_baumannii_4300STDY7045856	Acinetobacter_baumannii_ATCC_19606	97.6714	Acinetobacter baumannii
Acinetobacter_pittii_IHIT24944	Acinetobacter_pittii_DSM_25618	97.6717	Acinetobacter pittii
Acinetobacter_baumannii_Aci00884	Acinetobacter_baumannii_DSM_30007	97.6721	Acinetobacter baumannii
Acinetobacter_baumannii_SD	Acinetobacter_baumannii_ATCC_19606	97.6721	Acinetobacter baumannii
Acinetobacter_baumannii_2018HBAB1	Acinetobacter_baumannii_DSM_30007	97.6721	Acinetobacter baumannii
Acinetobacter_baumannii_Ab72	Acinetobacter_baumannii_DSM_30007	97.6725	Acinetobacter baumannii
Acinetobacter_baumannii_Aci00882	Acinetobacter_baumannii_DSM_30007	97.6726	Acinetobacter baumannii
Acinetobacter_baumannii_4300STDY6542376	Acinetobacter_baumannii_DSM_30007	97.6728	Acinetobacter baumannii
Acinetobacter_baumannii_4300STDY7045849	Acinetobacter_baumannii_ATCC_19606	97.6729	Acinetobacter baumannii
Acinetobacter_baumannii_PM6677	Acinetobacter_baumannii_ATCC_19606	97.6729	Acinetobacter baumannii
Acinetobacter_baumannii_NCTC7364	Acinetobacter_baumannii_DSM_30007	97.6737	Acinetobacter baumannii
Acinetobacter_baumannii_Aci00879	Acinetobacter_baumannii_DSM_30007	97.6742	Acinetobacter baumannii
Acinetobacter_baumannii_1195185_11	Acinetobacter_baumannii_DSM_30007	97.6743	Acinetobacter baumannii
Acinetobacter_baumannii_4300STDY7045695	Acinetobacter_baumannii_DSM_30007	97.6744	Acinetobacter baumannii
Acinetobacter_pittii_AS012606	Acinetobacter_pittii_DSM_25618	97.6746	Acinetobacter pittii
Acinetobacter_baumannii_4300STDY7045743	Acinetobacter_baumannii_DSM_30007	97.6747	Acinetobacter baumannii
Acinetobacter_baumannii_S10	Acinetobacter_baumannii_ATCC_19606	97.6748	Acinetobacter baumannii
Acinetobacter_baumannii_A3	Acinetobacter_baumannii_DSM_30007	97.6751	Acinetobacter baumannii
Acinetobacter_baumannii_WM98	Acinetobacter_baumannii_DSM_30007	97.6752	Acinetobacter baumannii
Acinetobacter_baumannii_VB29123	Acinetobacter_baumannii_DSM_30007	97.6755	Acinetobacter baumannii
Acinetobacter_baumannii_198	Acinetobacter_baumannii_ATCC_19606	97.6755	Acinetobacter baumannii
Acinetobacter_baumannii_A522	Acinetobacter_baumannii_ATCC_19606	97.6758	Acinetobacter baumannii
Acinetobacter_baumannii_Aci00881	Acinetobacter_baumannii_DSM_30007	97.676	Acinetobacter baumannii
Acinetobacter_baumannii_ARLG1846	Acinetobacter_baumannii_ATCC_19606	97.6761	Acinetobacter baumannii
Acinetobacter_baumannii_9102	Acinetobacter_baumannii_DSM_30007	97.6762	Acinetobacter baumannii
Acinetobacter_baumannii_TG22194	Acinetobacter_baumannii_DSM_30007	97.6765	Acinetobacter baumannii
Acinetobacter_gyllenbergii_NCCP_16015	Acinetobacter_proteolyticus_NIPH_809	97.6766	Acinetobacter proteolyticus
Acinetobacter_nosocomialis_AMA22	Acinetobacter_nosocomialis_LMG_10619	97.6767	Acinetobacter nosocomialis
Acinetobacter_baumannii_1195185_80	Acinetobacter_baumannii_ATCC_19606	97.6767	Acinetobacter baumannii
Acinetobacter_pittii_WCHAP100020	Acinetobacter_pittii_ATCC_19004	97.6768	Acinetobacter pittii
Acinetobacter_baumannii_ACIN00267	Acinetobacter_baumannii_DSM_30007	97.677	Acinetobacter baumannii
Acinetobacter_pittii_ABUH403	Acinetobacter_pittii_DSM_25618	97.6771	Acinetobacter pittii
Acinetobacter_baumannii_Cl300	Acinetobacter_baumannii_ATCC_19606	97.6771	Acinetobacter baumannii
Acinetobacter_baumannii_A-71.189	Acinetobacter_baumannii_DSM_30007	97.6772	Acinetobacter baumannii
Acinetobacter_baumannii_MRSN7725	Acinetobacter_baumannii_ATCC_19606	97.6774	Acinetobacter baumannii
Acinetobacter_baumannii_M	Acinetobacter_baumannii_DSM_30007	97.6775	Acinetobacter baumannii
Acinetobacter_baumannii_A297	Acinetobacter_baumannii_DSM_30007	97.6776	Acinetobacter baumannii
Acinetobacter_baumannii_AC40_M	Acinetobacter_baumannii_ATCC_19606	97.6776	Acinetobacter baumannii
Acinetobacter_baumannii_DMC-32a	Acinetobacter_baumannii_DSM_30007	97.6779	Acinetobacter baumannii
Acinetobacter_baumannii_J7	Acinetobacter_baumannii_DSM_30007	97.6779	Acinetobacter baumannii
Acinetobacter_sp._723929	Acinetobacter_pittii_ATCC_19004	97.678	Acinetobacter pittii
Acinetobacter_baumannii_ABBL049	Acinetobacter_baumannii_CIP_70.34	97.6785	Acinetobacter baumannii
Acinetobacter_baumannii_ACI40	Acinetobacter_baumannii_DSM_30007	97.6786	Acinetobacter baumannii
Acinetobacter_baumannii_KSK20	Acinetobacter_baumannii_ATCC_19606	97.6788	Acinetobacter baumannii
Acinetobacter_baumannii_4300STDY7045759	Acinetobacter_baumannii_ATCC_19606	97.6794	Acinetobacter baumannii
Acinetobacter_baumannii_s256	Acinetobacter_baumannii_DSM_30007	97.6795	Acinetobacter baumannii
Acinetobacter_baumannii_Ab182	Acinetobacter_baumannii_ATCC_19606	97.6801	Acinetobacter baumannii
Acinetobacter_baumannii_SI_2017_65	Acinetobacter_baumannii_DSM_30007	97.6802	Acinetobacter baumannii
Acinetobacter_baumannii_Ab187	Acinetobacter_baumannii_DSM_30007	97.6803	Acinetobacter baumannii
Acinetobacter_baumannii_A217	Acinetobacter_baumannii_ATCC_19606	97.6803	Acinetobacter baumannii
Acinetobacter_baumannii_A70	Acinetobacter_baumannii_DSM_30007	97.6804	Acinetobacter baumannii
Acinetobacter_baumannii_AB5075-VUB-itrA_ISAba13	Acinetobacter_baumannii_DSM_30007	97.6805	Acinetobacter baumannii
Acinetobacter_baumannii_830_16	Acinetobacter_baumannii_ATCC_19606	97.6806	Acinetobacter baumannii
Acinetobacter_baumannii_KAB14	Acinetobacter_baumannii_DSM_30007	97.6806	Acinetobacter baumannii
Acinetobacter_baumannii_MC23	Acinetobacter_baumannii_DSM_30007	97.6808	Acinetobacter baumannii
Acinetobacter_nosocomialis_2014S01-097	Acinetobacter_nosocomialis_NIPH_2119	97.6811	Acinetobacter nosocomialis
Acinetobacter_baumannii_DT-1139B	Acinetobacter_baumannii_ATCC_19606	97.6811	Acinetobacter baumannii
Acinetobacter_baumannii_837_16	Acinetobacter_baumannii_ATCC_19606	97.6814	Acinetobacter baumannii
Acinetobacter_baumannii_A023	Acinetobacter_baumannii_CIP_70.34	97.6814	Acinetobacter baumannii
Acinetobacter_nosocomialis_4300STDY7045889	Acinetobacter_nosocomialis_LMG_10619	97.6822	Acinetobacter nosocomialis
Acinetobacter_baumannii_AB_349	Acinetobacter_baumannii_ATCC_19606	97.6822	Acinetobacter baumannii
Acinetobacter_baumannii_630_16	Acinetobacter_baumannii_DSM_30007	97.6823	Acinetobacter baumannii
Acinetobacter_baumannii_AB_1650-8	Acinetobacter_baumannii_JCM_6841	97.6824	Acinetobacter baumannii
Acinetobacter_nosocomialis_AC1530	Acinetobacter_nosocomialis_LMG_10619	97.6828	Acinetobacter nosocomialis
Acinetobacter_baumannii_65	Acinetobacter_baumannii_ATCC_19606	97.6829	Acinetobacter baumannii
Acinetobacter_nosocomialis_2014N23-120	Acinetobacter_nosocomialis_NIPH_2119	97.683	Acinetobacter nosocomialis
Acinetobacter_baumannii_MRSN31915	Acinetobacter_baumannii_CIP_70.34	97.6833	Acinetobacter baumannii
Acinetobacter_baumannii_ABUH792	Acinetobacter_baumannii_DSM_30007	97.6833	Acinetobacter baumannii
Acinetobacter_baumannii_NCIMB_8209	Acinetobacter_baumannii_ATCC_19606	97.6833	Acinetobacter baumannii
Acinetobacter_baumannii_ACI53	Acinetobacter_baumannii_DSM_30007	97.6835	Acinetobacter baumannii
Acinetobacter_baumannii_XH769	Acinetobacter_baumannii_DSM_30007	97.6836	Acinetobacter baumannii
Acinetobacter_baumannii_14216	Acinetobacter_baumannii_DSM_30007	97.6837	Acinetobacter baumannii
Acinetobacter_baumannii_461_16	Acinetobacter_baumannii_DSM_30007	97.684	Acinetobacter baumannii
Acinetobacter_baumannii_L	Acinetobacter_baumannii_DSM_30007	97.6847	Acinetobacter baumannii
Acinetobacter_baumannii_17A1955	Acinetobacter_baumannii_ATCC_19606	97.6847	Acinetobacter baumannii
Acinetobacter_baumannii_abaum002	Acinetobacter_baumannii_DSM_30007	97.685	Acinetobacter baumannii
Acinetobacter_pittii_IHIT32685	Acinetobacter_pittii_ATCC_19004	97.685	Acinetobacter pittii
Acinetobacter_baumannii_ANC_4097	Acinetobacter_baumannii_DSM_30007	97.6851	Acinetobacter baumannii
Acinetobacter_baumannii_AB487	Acinetobacter_baumannii_DSM_30007	97.6851	Acinetobacter baumannii
Acinetobacter_baumannii_GML-KP48-AB-TR	Acinetobacter_baumannii_ATCC_19606	97.6851	Acinetobacter baumannii
Acinetobacter_baumannii_DMS06670	Acinetobacter_baumannii_DSM_30007	97.6854	Acinetobacter baumannii
Acinetobacter_baumannii_4300STDY7045702	Acinetobacter_baumannii_ATCC_19606	97.6855	Acinetobacter baumannii
Acinetobacter_baumannii_ABS103	Acinetobacter_baumannii_DSM_30007	97.6857	Acinetobacter baumannii
Acinetobacter_baumannii_AbBAS-1	Acinetobacter_baumannii_DSM_30007	97.6858	Acinetobacter baumannii
Acinetobacter_baumannii_ACIN00170	Acinetobacter_baumannii_DSM_30007	97.6859	Acinetobacter baumannii
Acinetobacter_baumannii_Pesh-14	Acinetobacter_baumannii_DSM_30007	97.6861	Acinetobacter baumannii
Acinetobacter_baumannii_4300STDY7045884	Acinetobacter_baumannii_ATCC_19606	97.6861	Acinetobacter baumannii
Acinetobacter_baumannii_TG16790	Acinetobacter_baumannii_DSM_30007	97.6862	Acinetobacter baumannii
Acinetobacter_baumannii_162_17	Acinetobacter_baumannii_DSM_30007	97.6862	Acinetobacter baumannii
Acinetobacter_baumannii_ARLG-1860	Acinetobacter_baumannii_DSM_30007	97.6864	Acinetobacter baumannii
Acinetobacter_baumannii_DSM_30011	Acinetobacter_baumannii_DSM_30007	97.6865	Acinetobacter baumannii
Acinetobacter_baumannii_AR_0101	Acinetobacter_baumannii_CIP_70.34	97.6868	Acinetobacter baumannii
Acinetobacter_baumannii_XH840	Acinetobacter_baumannii_ATCC_19606	97.687	Acinetobacter baumannii
Acinetobacter_baumannii_42057_4	Acinetobacter_baumannii_ATCC_19606	97.687	Acinetobacter baumannii
Acinetobacter_baumannii_KSK19	Acinetobacter_baumannii_ATCC_19606	97.6872	Acinetobacter baumannii
Acinetobacter_baumannii_MRSN32304	Acinetobacter_baumannii_DSM_30007	97.6872	Acinetobacter baumannii
Acinetobacter_baumannii_F	Acinetobacter_baumannii_DSM_30007	97.6876	Acinetobacter baumannii
Acinetobacter_baumannii_KAB17	Acinetobacter_baumannii_DSM_30007	97.6878	Acinetobacter baumannii
Acinetobacter_baumannii_20A2942	Acinetobacter_baumannii_DSM_30007	97.6878	Acinetobacter baumannii
Acinetobacter_baumannii_MRSN20755	Acinetobacter_baumannii_DSM_30007	97.6879	Acinetobacter baumannii
Acinetobacter_baumannii_ACMH-6200	Acinetobacter_baumannii_DSM_30007	97.688	Acinetobacter baumannii
Acinetobacter_baumannii_CCBH26689	Acinetobacter_baumannii_JCM_6841	97.6882	Acinetobacter baumannii
Acinetobacter_baumannii_KZ-1093	Acinetobacter_baumannii_DSM_30007	97.6885	Acinetobacter baumannii
Acinetobacter_baumannii_NIPH_329	Acinetobacter_baumannii_CIP_70.34	97.6887	Acinetobacter baumannii
Acinetobacter_baumannii_722310	Acinetobacter_baumannii_DSM_30007	97.6888	Acinetobacter baumannii
Acinetobacter_baumannii_ABS200	Acinetobacter_baumannii_DSM_30007	97.689	Acinetobacter baumannii
Acinetobacter_baumannii_Ab109	Acinetobacter_baumannii_DSM_30007	97.689	Acinetobacter baumannii
Acinetobacter_baumannii_2375	Acinetobacter_baumannii_DSM_30007	97.6893	Acinetobacter baumannii
Acinetobacter_baumannii_CCF8	Acinetobacter_baumannii_DSM_30007	97.6901	Acinetobacter baumannii
Acinetobacter_baumannii_KSK2	Acinetobacter_baumannii_DSM_30007	97.6909	Acinetobacter baumannii
Acinetobacter_baumannii_AB_347	Acinetobacter_baumannii_DSM_30007	97.6909	Acinetobacter baumannii
Acinetobacter_baumannii_SP2448	Acinetobacter_baumannii_ATCC_19606	97.6909	Acinetobacter baumannii
Acinetobacter_baumannii_E	Acinetobacter_baumannii_DSM_30007	97.6912	Acinetobacter baumannii
Acinetobacter_baumannii_KSK6	Acinetobacter_baumannii_ATCC_19606	97.6914	Acinetobacter baumannii
Acinetobacter_baumannii_AB_1649-8	Acinetobacter_baumannii_DSM_30007	97.6914	Acinetobacter baumannii
Acinetobacter_baumannii_151	Acinetobacter_baumannii_DSM_30007	97.6916	Acinetobacter baumannii
Acinetobacter_baumannii_472237-120	Acinetobacter_baumannii_ATCC_19606	97.6916	Acinetobacter baumannii
Acinetobacter_baumannii_BA22685	Acinetobacter_baumannii_DSM_30007	97.6917	Acinetobacter baumannii
Acinetobacter_baumannii_NIPH_60	Acinetobacter_baumannii_DSM_30007	97.6917	Acinetobacter baumannii
Acinetobacter_baumannii_KSK7	Acinetobacter_baumannii_ATCC_19606	97.6918	Acinetobacter baumannii
Acinetobacter_baumannii_KSK18	Acinetobacter_baumannii_ATCC_19606	97.6918	Acinetobacter baumannii
Acinetobacter_baumannii_J10	Acinetobacter_baumannii_DSM_30007	97.692	Acinetobacter baumannii
Acinetobacter_baumannii_NIPH_80	Acinetobacter_baumannii_DSM_30007	97.692	Acinetobacter baumannii
Acinetobacter_baumannii_521_17	Acinetobacter_baumannii_DSM_30007	97.6922	Acinetobacter baumannii
Acinetobacter_baumannii_14A750	Acinetobacter_baumannii_DSM_30007	97.6924	Acinetobacter baumannii
Acinetobacter_nosocomialis_AC1648	Acinetobacter_nosocomialis_LMG_10619	97.6927	Acinetobacter nosocomialis
Acinetobacter_nosocomialis_GTC_03312	Acinetobacter_nosocomialis_LMG_10619	97.6931	Acinetobacter nosocomialis
Acinetobacter_baumannii_MRSN14193	Acinetobacter_baumannii_DSM_30007	97.6934	Acinetobacter baumannii
Acinetobacter_baumannii_ARLG1787	Acinetobacter_baumannii_DSM_30007	97.6935	Acinetobacter baumannii
Acinetobacter_baumannii_A85	Acinetobacter_baumannii_DSM_30007	97.6935	Acinetobacter baumannii
Acinetobacter_baumannii_ABBL017	Acinetobacter_baumannii_CIP_70.34	97.6936	Acinetobacter baumannii
Acinetobacter_baumannii_KSK11	Acinetobacter_baumannii_ATCC_19606	97.6937	Acinetobacter baumannii
Acinetobacter_baumannii_ACIN00167	Acinetobacter_baumannii_DSM_30007	97.6937	Acinetobacter baumannii
Acinetobacter_bereziniae_NIPH_3	Acinetobacter_bereziniae_LMG_1003	97.6939	Acinetobacter bereziniae
Acinetobacter_baumannii_MRSN15313	Acinetobacter_baumannii_ATCC_19606	97.6939	Acinetobacter baumannii
Acinetobacter_baumannii_17-84	Acinetobacter_pittii_ATCC_19004	97.6942	Acinetobacter pittii
Acinetobacter_baumannii_PR379	Acinetobacter_baumannii_DSM_30007	97.6944	Acinetobacter baumannii
Acinetobacter_pittii_CEP14	Acinetobacter_pittii_ATCC_19004	97.6944	Acinetobacter pittii
Acinetobacter_baumannii_2008S11-069	Acinetobacter_baumannii_DSM_30007	97.6945	Acinetobacter baumannii
Acinetobacter_baumannii_SIUA6	Acinetobacter_baumannii_ATCC_19606	97.6946	Acinetobacter baumannii
Acinetobacter_baumannii_1297549	Acinetobacter_baumannii_ATCC_19606	97.6947	Acinetobacter baumannii
Acinetobacter_baumannii_DETAB-P39	Acinetobacter_baumannii_DSM_30007	97.6948	Acinetobacter baumannii
Acinetobacter_baumannii_ABUH505	Acinetobacter_baumannii_JCM_6841	97.695	Acinetobacter baumannii
Acinetobacter_baumannii_541_17	Acinetobacter_baumannii_DSM_30007	97.6951	Acinetobacter baumannii
Acinetobacter_baumannii_A-71.193	Acinetobacter_baumannii_DSM_30007	97.6951	Acinetobacter baumannii
Acinetobacter_baumannii_A465	Acinetobacter_baumannii_DSM_30007	97.6952	Acinetobacter baumannii
Acinetobacter_baumannii_7893	Acinetobacter_baumannii_DSM_30007	97.6953	Acinetobacter baumannii
Acinetobacter_baumannii_SP2486	Acinetobacter_baumannii_DSM_30007	97.6953	Acinetobacter baumannii
Acinetobacter_baumannii_AC19	Acinetobacter_baumannii_DSM_30007	97.6954	Acinetobacter baumannii
Acinetobacter_baumannii_DA33382	Acinetobacter_baumannii_DSM_30007	97.6954	Acinetobacter baumannii
Acinetobacter_baumannii_19A2692	Acinetobacter_baumannii_ATCC_19606	97.6955	Acinetobacter baumannii
Acinetobacter_baumannii_A8-T	Acinetobacter_baumannii_DSM_30007	97.6958	Acinetobacter baumannii
Acinetobacter_baumannii_808_16	Acinetobacter_baumannii_ATCC_19606	97.696	Acinetobacter baumannii
Acinetobacter_baumannii_TG22332	Acinetobacter_baumannii_DSM_30007	97.6962	Acinetobacter baumannii
Acinetobacter_baumannii_Survcare255	Acinetobacter_baumannii_DSM_30007	97.6963	Acinetobacter baumannii
Acinetobacter_baumannii_NCTC7412	Acinetobacter_baumannii_DSM_30007	97.6963	Acinetobacter baumannii
Acinetobacter_baumannii_ACI42	Acinetobacter_baumannii_DSM_30007	97.6963	Acinetobacter baumannii
Acinetobacter_baumannii_20A2875	Acinetobacter_baumannii_DSM_30007	97.6964	Acinetobacter baumannii
Acinetobacter_baumannii_AR_0037	Acinetobacter_baumannii_DSM_30007	97.6965	Acinetobacter baumannii
Acinetobacter_baumannii_UH11608	Acinetobacter_baumannii_ATCC_19606	97.6966	Acinetobacter baumannii
Acinetobacter_baumannii_464_16	Acinetobacter_baumannii_DSM_30007	97.6966	Acinetobacter baumannii
Acinetobacter_baumannii_IITR88	Acinetobacter_baumannii_DSM_30007	97.6968	Acinetobacter baumannii
Acinetobacter_baumannii_Aba_18S	Acinetobacter_baumannii_DSM_30007	97.6968	Acinetobacter baumannii
Acinetobacter_baumannii_1295743	Acinetobacter_baumannii_ATCC_19606	97.6969	Acinetobacter baumannii
Acinetobacter_baumannii_AB4448	Acinetobacter_baumannii_DSM_30007	97.697	Acinetobacter baumannii
Acinetobacter_baumannii_Ab203	Acinetobacter_baumannii_DSM_30007	97.697	Acinetobacter baumannii
Acinetobacter_baumannii_M476	Acinetobacter_baumannii_DSM_30007	97.6974	Acinetobacter baumannii
Acinetobacter_baumannii_ABBL053	Acinetobacter_baumannii_DSM_30007	97.6974	Acinetobacter baumannii
Acinetobacter_baumannii_D13	Acinetobacter_baumannii_DSM_30007	97.6976	Acinetobacter baumannii
Acinetobacter_nosocomialis_UBA5786	Acinetobacter_nosocomialis_NIPH_2119	97.698	Acinetobacter nosocomialis
Acinetobacter_baumannii_TUM16642	Acinetobacter_baumannii_ATCC_19606	97.6981	Acinetobacter baumannii
Acinetobacter_baumannii_s216	Acinetobacter_baumannii_ATCC_19606	97.6984	Acinetobacter baumannii
Acinetobacter_baumannii_AbCTX19	Acinetobacter_baumannii_DSM_30007	97.6985	Acinetobacter baumannii
Acinetobacter_baumannii_AB186-VUB	Acinetobacter_baumannii_ATCC_19606	97.6985	Acinetobacter baumannii
Acinetobacter_baumannii_15953	Acinetobacter_baumannii_ATCC_19606	97.699	Acinetobacter baumannii
Acinetobacter_baumannii_VNMU133	Acinetobacter_baumannii_ATCC_19606	97.6991	Acinetobacter baumannii
Acinetobacter_baumannii_1494580	Acinetobacter_baumannii_ATCC_19606	97.6992	Acinetobacter baumannii
Acinetobacter_baumannii_ABOB01	Acinetobacter_baumannii_DSM_30007	97.6993	Acinetobacter baumannii
Acinetobacter_baumannii_AB77	Acinetobacter_baumannii_DSM_30007	97.6993	Acinetobacter baumannii
Acinetobacter_baumannii_MRSN3360	Acinetobacter_baumannii_ATCC_19606	97.6993	Acinetobacter baumannii
Acinetobacter_baumannii_4300STDY7045766	Acinetobacter_baumannii_DSM_30007	97.6993	Acinetobacter baumannii
Acinetobacter_baumannii_2004ZJAB5	Acinetobacter_baumannii_DSM_30007	97.6994	Acinetobacter baumannii
Acinetobacter_baumannii_172830	Acinetobacter_baumannii_ATCC_19606	97.6995	Acinetobacter baumannii
Acinetobacter_baumannii_LWSS-_03-02-11B	Acinetobacter_baumannii_DSM_30007	97.6996	Acinetobacter baumannii
Acinetobacter_baumannii_XH683	Acinetobacter_baumannii_DSM_30007	97.7003	Acinetobacter baumannii
Acinetobacter_baumannii_XH690	Acinetobacter_baumannii_ATCC_19606	97.7003	Acinetobacter baumannii
Acinetobacter_baumannii_ABBL056	Acinetobacter_baumannii_JCM_6841	97.7004	Acinetobacter baumannii
Acinetobacter_baumannii_UMB002	Acinetobacter_baumannii_ATCC_19606	97.7004	Acinetobacter baumannii
Acinetobacter_baumannii_ARLG-1788	Acinetobacter_baumannii_DSM_30007	97.7006	Acinetobacter baumannii
Acinetobacter_baumannii_1043794	Acinetobacter_baumannii_ATCC_19606	97.7007	Acinetobacter baumannii
Acinetobacter_baumannii_ABH008	Acinetobacter_baumannii_DSM_30007	97.7007	Acinetobacter baumannii
Acinetobacter_baumannii_MRSN6541	Acinetobacter_baumannii_DSM_30007	97.7009	Acinetobacter baumannii
Acinetobacter_haemolyticus_AN43	Acinetobacter_haemolyticus_MTCC_9819	97.7009	Acinetobacter haemolyticus
Acinetobacter_baumannii_CCBH28245	Acinetobacter_baumannii_ATCC_19606	97.7011	Acinetobacter baumannii
Acinetobacter_baumannii_ABS042	Acinetobacter_baumannii_DSM_30007	97.7016	Acinetobacter baumannii
Acinetobacter_pittii_ARLG1798	Acinetobacter_pittii_ATCC_19004	97.7018	Acinetobacter pittii
Acinetobacter_baumannii_ARLG1827	Acinetobacter_baumannii_DSM_30007	97.702	Acinetobacter baumannii
Acinetobacter_baumannii_MRSN6273	Acinetobacter_baumannii_ATCC_19606	97.702	Acinetobacter baumannii
Acinetobacter_baumannii_AB_TG27339	Acinetobacter_baumannii_DSM_30007	97.702	Acinetobacter baumannii
Acinetobacter_baumannii_MRSN15093	Acinetobacter_baumannii_ATCC_19606	97.7022	Acinetobacter baumannii
Acinetobacter_baumannii_ZQ5	Acinetobacter_baumannii_ATCC_19606	97.7023	Acinetobacter baumannii
Acinetobacter_baumannii_AB-HZ-S73	Acinetobacter_baumannii_ATCC_19606	97.7027	Acinetobacter baumannii
Acinetobacter_baumannii_IHIT25424	Acinetobacter_baumannii_DSM_30007	97.7028	Acinetobacter baumannii
Acinetobacter_pittii_ARLG1804	Acinetobacter_pittii_DSM_25618	97.7029	Acinetobacter pittii
Acinetobacter_baumannii_ABUH383	Acinetobacter_baumannii_ATCC_19606	97.7033	Acinetobacter baumannii
Acinetobacter_baumannii_MRSN15075	Acinetobacter_baumannii_ATCC_19606	97.7033	Acinetobacter baumannii
Acinetobacter_towneri_19110F47	Acinetobacter_towneri_DSM_14962	97.7036	Acinetobacter towneri
Acinetobacter_baumannii_19A2655	Acinetobacter_baumannii_DSM_30007	97.7036	Acinetobacter baumannii
Acinetobacter_baumannii_9201	Acinetobacter_baumannii_ATCC_19606	97.7037	Acinetobacter baumannii
Acinetobacter_baumannii_Aci00880	Acinetobacter_baumannii_DSM_30007	97.7038	Acinetobacter baumannii
Acinetobacter_baumannii_4300STDY7045770	Acinetobacter_baumannii_DSM_30007	97.7039	Acinetobacter baumannii
Acinetobacter_baumannii_ABUH502	Acinetobacter_baumannii_DSM_30007	97.7043	Acinetobacter baumannii
Acinetobacter_baumannii_810CP	Acinetobacter_baumannii_ATCC_19606	97.7043	Acinetobacter baumannii
Acinetobacter_baumannii_TG15434	Acinetobacter_baumannii_DSM_30007	97.7045	Acinetobacter baumannii
Acinetobacter_baumannii_ARLG1794	Acinetobacter_baumannii_DSM_30007	97.7045	Acinetobacter baumannii
Acinetobacter_nosocomialis_AC15131	Acinetobacter_nosocomialis_NIPH_2119	97.7047	Acinetobacter nosocomialis
Acinetobacter_baumannii_MRSN7446	Acinetobacter_baumannii_ATCC_19606	97.7049	Acinetobacter baumannii
Acinetobacter_baumannii_MRSN32108	Acinetobacter_baumannii_DSM_30007	97.7052	Acinetobacter baumannii
Acinetobacter_baumannii_OCU_Ac16a	Acinetobacter_baumannii_DSM_30007	97.7053	Acinetobacter baumannii
Acinetobacter_sp._225588	Acinetobacter_pittii_DSM_25618	97.7053	Acinetobacter pittii
Acinetobacter_proteolyticus_ANC_3849	Acinetobacter_proteolyticus_NIPH_809	97.7057	Acinetobacter proteolyticus
Acinetobacter_haemolyticus_AN59	Acinetobacter_haemolyticus_MTCC_9819	97.7059	Acinetobacter haemolyticus
Acinetobacter_baumannii_19A2710	Acinetobacter_baumannii_DSM_30007	97.7061	Acinetobacter baumannii
Acinetobacter_baumannii_AR_0036	Acinetobacter_baumannii_DSM_30007	97.7062	Acinetobacter baumannii
Acinetobacter_baumannii_s222	Acinetobacter_baumannii_DSM_30007	97.7062	Acinetobacter baumannii
Acinetobacter_baumannii_AR_0078	Acinetobacter_baumannii_DSM_30007	97.7064	Acinetobacter baumannii
Acinetobacter_baumannii_NIPH_290	Acinetobacter_baumannii_DSM_30007	97.7064	Acinetobacter baumannii
Acinetobacter_baumannii_484_16	Acinetobacter_baumannii_DSM_30007	97.7067	Acinetobacter baumannii
Acinetobacter_baumannii_ARLG1858	Acinetobacter_baumannii_DSM_30007	97.707	Acinetobacter baumannii
Acinetobacter_baumannii_A388	Acinetobacter_baumannii_DSM_30007	97.7071	Acinetobacter baumannii
Acinetobacter_baumannii_AB-HZ-S04	Acinetobacter_baumannii_DSM_30007	97.7074	Acinetobacter baumannii
Acinetobacter_baumannii_ABAY13019	Acinetobacter_baumannii_DSM_30007	97.7083	Acinetobacter baumannii
Acinetobacter_baumannii_UH384_444	Acinetobacter_baumannii_DSM_30007	97.7086	Acinetobacter baumannii
Acinetobacter_baumannii_ABBL001	Acinetobacter_baumannii_ATCC_19606	97.7086	Acinetobacter baumannii
Acinetobacter_baumannii_2015ZJAB9	Acinetobacter_baumannii_DSM_30007	97.7086	Acinetobacter baumannii
Acinetobacter_baumannii_KR3831	Acinetobacter_baumannii_DSM_30007	97.7088	Acinetobacter baumannii
Acinetobacter_baumannii_SC02	Acinetobacter_baumannii_DSM_30007	97.7091	Acinetobacter baumannii
Acinetobacter_baumannii_4300STDY7045847	Acinetobacter_baumannii_DSM_30007	97.7091	Acinetobacter baumannii
Acinetobacter_nosocomialis_TUM15325	Acinetobacter_nosocomialis_NIPH_2119	97.7092	Acinetobacter nosocomialis
Acinetobacter_pittii_TG22176	Acinetobacter_pittii_ATCC_19004	97.7095	Acinetobacter pittii
Acinetobacter_baumannii_ABUH642	Acinetobacter_baumannii_DSM_30007	97.7095	Acinetobacter baumannii
Acinetobacter_sp._FDAARGOS_495	Acinetobacter_baumannii_DSM_30007	97.7096	Acinetobacter baumannii
Acinetobacter_baumannii_MRSN3941	Acinetobacter_baumannii_DSM_30007	97.71	Acinetobacter baumannii
Acinetobacter_baumannii_s215	Acinetobacter_baumannii_DSM_30007	97.7101	Acinetobacter baumannii
Acinetobacter_indicus_GXNN15X4	Acinetobacter_indicus_CIP_110367	97.7103	Acinetobacter indicus
Acinetobacter_nosocomialis_AC15183	Acinetobacter_nosocomialis_NIPH_2119	97.7105	Acinetobacter nosocomialis
Acinetobacter_baumannii_PR329	Acinetobacter_baumannii_DSM_30007	97.7107	Acinetobacter baumannii
Acinetobacter_pittii_ACIN00171	Acinetobacter_pittii_ATCC_19004	97.7107	Acinetobacter pittii
Acinetobacter_baumannii_ZQ6	Acinetobacter_baumannii_DSM_30007	97.7107	Acinetobacter baumannii
Acinetobacter_baumannii_550_16	Acinetobacter_baumannii_DSM_30007	97.711	Acinetobacter baumannii
Acinetobacter_baumannii_AB5075	Acinetobacter_baumannii_DSM_30007	97.7111	Acinetobacter baumannii
Acinetobacter_baumannii_PR361	Acinetobacter_baumannii_DSM_30007	97.7112	Acinetobacter baumannii
Acinetobacter_baumannii_Aci00759	Acinetobacter_baumannii_DSM_30007	97.7113	Acinetobacter baumannii
Acinetobacter_pittii_UKK-0548	Acinetobacter_pittii_ATCC_19004	97.7113	Acinetobacter pittii
Acinetobacter_baumannii_4300STDY7045880	Acinetobacter_baumannii_DSM_30007	97.7115	Acinetobacter baumannii
Acinetobacter_baumannii_4300STDY7045857	Acinetobacter_baumannii_ATCC_19606	97.7115	Acinetobacter baumannii
Acinetobacter_baumannii_MRSN_57	Acinetobacter_baumannii_DSM_30007	97.7118	Acinetobacter baumannii
Acinetobacter_baumannii_XH686	Acinetobacter_baumannii_JCM_6841	97.7119	Acinetobacter baumannii
Acinetobacter_indicus_TQ23	Acinetobacter_indicus_CIP_110367	97.7119	Acinetobacter indicus
Acinetobacter_baumannii_478_16	Acinetobacter_baumannii_ATCC_19606	97.7121	Acinetobacter baumannii
Acinetobacter_baumannii_MRSN_3527	Acinetobacter_baumannii_DSM_30007	97.7125	Acinetobacter baumannii
Acinetobacter_baumannii_MCR56	Acinetobacter_baumannii_DSM_30007	97.7125	Acinetobacter baumannii
Acinetobacter_junii_AMA32	Acinetobacter_junii_CIP_64.5	97.7126	Acinetobacter junii
Acinetobacter_pittii_AS012629	Acinetobacter_lactucae_NRRL_B-41902	97.7127	Acinetobacter lactucae
Acinetobacter_baumannii_4300STDY7045714	Acinetobacter_baumannii_DSM_30007	97.7127	Acinetobacter baumannii
Acinetobacter_baumannii_2004ZJAB6	Acinetobacter_baumannii_DSM_30007	97.7127	Acinetobacter baumannii
Acinetobacter_baumannii_ABBL003	Acinetobacter_baumannii_DSM_30007	97.713	Acinetobacter baumannii
Acinetobacter_baumannii_3.5D	Acinetobacter_baumannii_DSM_30007	97.7131	Acinetobacter baumannii
Acinetobacter_baumannii_ACIN00248	Acinetobacter_baumannii_DSM_30007	97.7136	Acinetobacter baumannii
Acinetobacter_baumannii_4300STDY7045874	Acinetobacter_baumannii_ATCC_19606	97.7138	Acinetobacter baumannii
Acinetobacter_baumannii_19A2668	Acinetobacter_baumannii_CIP_70.34	97.7141	Acinetobacter baumannii
Acinetobacter_baumannii_300_16	Acinetobacter_baumannii_ATCC_19606	97.7142	Acinetobacter baumannii
Acinetobacter_baumannii_TG69784	Acinetobacter_baumannii_ATCC_19606	97.7143	Acinetobacter baumannii
Acinetobacter_nosocomialis_TG21145	Acinetobacter_nosocomialis_LMG_10619	97.7146	Acinetobacter nosocomialis
Acinetobacter_baumannii_4300STDY7045752	Acinetobacter_baumannii_DSM_30007	97.7146	Acinetobacter baumannii
Acinetobacter_baumannii_T1060578	Acinetobacter_baumannii_DSM_30007	97.7147	Acinetobacter baumannii
Acinetobacter_baumannii_MRSN5540	Acinetobacter_baumannii_ATCC_19606	97.7147	Acinetobacter baumannii
Acinetobacter_baumannii_MRSN7690	Acinetobacter_baumannii_DSM_30007	97.7149	Acinetobacter baumannii
Acinetobacter_baumannii_INTEC_OZFC7	Acinetobacter_baumannii_DSM_30007	97.715	Acinetobacter baumannii
Acinetobacter_baumannii_NIPH_201	Acinetobacter_baumannii_DSM_30007	97.7151	Acinetobacter baumannii
Acinetobacter_pittii_D499	Acinetobacter_pittii_ATCC_19004	97.7151	Acinetobacter pittii
Acinetobacter_pittii_ACIN00178	Acinetobacter_pittii_DSM_25618	97.7152	Acinetobacter pittii
Acinetobacter_baumannii_BJAB0715	Acinetobacter_baumannii_ATCC_19606	97.7153	Acinetobacter baumannii
Acinetobacter_baumannii_IS-235	Acinetobacter_baumannii_DSM_30007	97.7154	Acinetobacter baumannii
Acinetobacter_baumannii_CCBH27996	Acinetobacter_baumannii_DSM_30007	97.7154	Acinetobacter baumannii
Acinetobacter_baumannii_AB_2007-16-27-01	Acinetobacter_baumannii_CIP_70.34	97.7154	Acinetobacter baumannii
Acinetobacter_baumannii_AB_TG27343	Acinetobacter_baumannii_ATCC_19606	97.7156	Acinetobacter baumannii
Acinetobacter_baumannii_UH6907	Acinetobacter_baumannii_JCM_6841	97.7157	Acinetobacter baumannii
Acinetobacter_baumannii_IS-58	Acinetobacter_baumannii_DSM_30007	97.7157	Acinetobacter baumannii
Acinetobacter_ursingii_UBA6569	Acinetobacter_ursingii_DSM_16037	97.7157	Acinetobacter ursingii
Acinetobacter_baumannii_A87	Acinetobacter_baumannii_DSM_30007	97.7159	Acinetobacter baumannii
Acinetobacter_pittii_TG41230	Acinetobacter_pittii_DSM_25618	97.716	Acinetobacter pittii
Acinetobacter_baumannii_SP4673	Acinetobacter_baumannii_CIP_70.34	97.7163	Acinetobacter baumannii
Acinetobacter_baumannii_KAB19	Acinetobacter_baumannii_DSM_30007	97.7163	Acinetobacter baumannii
Acinetobacter_baumannii_ARLG1896	Acinetobacter_baumannii_DSM_30007	97.7163	Acinetobacter baumannii
Acinetobacter_baumannii_ARLG1810	Acinetobacter_baumannii_DSM_30007	97.7164	Acinetobacter baumannii
Acinetobacter_pittii_CEB-Ap	Acinetobacter_pittii_DSM_25618	97.7164	Acinetobacter pittii
Acinetobacter_pittii_PR331	Acinetobacter_pittii_ATCC_19004	97.7166	Acinetobacter pittii
Acinetobacter_baumannii_4300STDY7045891	Acinetobacter_baumannii_ATCC_19606	97.7166	Acinetobacter baumannii
Acinetobacter_baumannii_3207	Acinetobacter_baumannii_DSM_30007	97.7169	Acinetobacter baumannii
Acinetobacter_baumannii_FDAARGOS_1036	Acinetobacter_baumannii_JCM_6841	97.7169	Acinetobacter baumannii
Acinetobacter_baumannii_AR_0063	Acinetobacter_baumannii_DSM_30007	97.7169	Acinetobacter baumannii
Acinetobacter_baumannii_ABAY10006	Acinetobacter_baumannii_DSM_30007	97.7173	Acinetobacter baumannii
Acinetobacter_baumannii_366_16	Acinetobacter_baumannii_DSM_30007	97.7174	Acinetobacter baumannii
Acinetobacter_baumannii_MRSN_58	Acinetobacter_baumannii_DSM_30007	97.7175	Acinetobacter baumannii
Acinetobacter_baumannii_AB5075-UW	Acinetobacter_baumannii_DSM_30007	97.7175	Acinetobacter baumannii
Acinetobacter_baumannii_1546444	Acinetobacter_baumannii_DSM_30007	97.7176	Acinetobacter baumannii
Acinetobacter_sp._1130196	Acinetobacter_nosocomialis_LMG_10619	97.7181	Acinetobacter nosocomialis
Acinetobacter_baumannii_NIPH_527	Acinetobacter_baumannii_ATCC_19606	97.7183	Acinetobacter baumannii
Acinetobacter_pittii_TG31980	Acinetobacter_pittii_DSM_25618	97.7184	Acinetobacter pittii
Acinetobacter_baumannii_FK_2016_46	Acinetobacter_baumannii_DSM_30007	97.7184	Acinetobacter baumannii
Acinetobacter_baumannii_MRSN21681	Acinetobacter_baumannii_DSM_30007	97.7184	Acinetobacter baumannii
Acinetobacter_baumannii_19A2597	Acinetobacter_baumannii_JCM_6841	97.7185	Acinetobacter baumannii
Acinetobacter_baumannii_VB24319	Acinetobacter_baumannii_DSM_30007	97.7185	Acinetobacter baumannii
Acinetobacter_baumannii_XH702	Acinetobacter_baumannii_ATCC_19606	97.7187	Acinetobacter baumannii
Acinetobacter_baumannii_Pesh-20	Acinetobacter_baumannii_DSM_30007	97.7191	Acinetobacter baumannii
Acinetobacter_baumannii_ABBL034	Acinetobacter_baumannii_ATCC_19606	97.7191	Acinetobacter baumannii
Acinetobacter_baumannii_UH22908	Acinetobacter_baumannii_JCM_6841	97.7191	Acinetobacter baumannii
Acinetobacter_baumannii_LY2	Acinetobacter_baumannii_DSM_30007	97.7193	Acinetobacter baumannii
Acinetobacter_baumannii_ABBL006	Acinetobacter_baumannii_ATCC_19606	97.7194	Acinetobacter baumannii
Acinetobacter_baumannii_KAB22	Acinetobacter_baumannii_DSM_30007	97.7197	Acinetobacter baumannii
Acinetobacter_haemolyticus_NCTC10306	Acinetobacter_haemolyticus_MTCC_9819	97.7198	Acinetobacter haemolyticus
Acinetobacter_baumannii_ABNIH19	Acinetobacter_baumannii_DSM_30007	97.7199	Acinetobacter baumannii
Acinetobacter_baumannii_AR_0083	Acinetobacter_baumannii_DSM_30007	97.7199	Acinetobacter baumannii
Acinetobacter_baumannii_A7-T	Acinetobacter_baumannii_DSM_30007	97.7202	Acinetobacter baumannii
Acinetobacter_baumannii_Ab2159	Acinetobacter_baumannii_ATCC_19606	97.7203	Acinetobacter baumannii
Acinetobacter_baumannii_4300STDY7045814	Acinetobacter_baumannii_ATCC_19606	97.7204	Acinetobacter baumannii
Acinetobacter_baumannii_1505311	Acinetobacter_baumannii_ATCC_19606	97.7207	Acinetobacter baumannii
Acinetobacter_baumannii_ABAY13018	Acinetobacter_baumannii_DSM_30007	97.7207	Acinetobacter baumannii
Acinetobacter_baumannii_OIFC109	Acinetobacter_baumannii_ATCC_19606	97.7214	Acinetobacter baumannii
Acinetobacter_baumannii_Aci00711	Acinetobacter_baumannii_JCM_6841	97.7215	Acinetobacter baumannii
Acinetobacter_baumannii_MCR8683	Acinetobacter_baumannii_ATCC_19606	97.7215	Acinetobacter baumannii
Acinetobacter_baumannii_A2	Acinetobacter_baumannii_DSM_30007	97.7217	Acinetobacter baumannii
Acinetobacter_baumannii_T214	Acinetobacter_baumannii_ATCC_19606	97.7217	Acinetobacter baumannii
Acinetobacter_baumannii_CCF3	Acinetobacter_baumannii_DSM_30007	97.7218	Acinetobacter baumannii
Acinetobacter_baumannii_11510	Acinetobacter_baumannii_JCM_6841	97.7218	Acinetobacter baumannii
Acinetobacter_baumannii_AB_235	Acinetobacter_baumannii_ATCC_19606	97.722	Acinetobacter baumannii
Acinetobacter_baumannii_548_16	Acinetobacter_baumannii_ATCC_19606	97.7221	Acinetobacter baumannii
Acinetobacter_baumannii_MRSN32797	Acinetobacter_baumannii_ATCC_19606	97.7221	Acinetobacter baumannii
Acinetobacter_baumannii_KCRI-33	Acinetobacter_baumannii_ATCC_19606	97.7223	Acinetobacter baumannii
Acinetobacter_baumannii_ABUH658	Acinetobacter_baumannii_DSM_30007	97.7223	Acinetobacter baumannii
Acinetobacter_baumannii_ABAY14005	Acinetobacter_baumannii_DSM_30007	97.7225	Acinetobacter baumannii
Acinetobacter_baumannii_D62	Acinetobacter_baumannii_ATCC_19606	97.7226	Acinetobacter baumannii
Acinetobacter_baumannii_A40	Acinetobacter_baumannii_DSM_30007	97.7228	Acinetobacter baumannii
Acinetobacter_baumannii_50411	Acinetobacter_baumannii_DSM_30007	97.7233	Acinetobacter baumannii
Acinetobacter_baumannii_Aci00827	Acinetobacter_baumannii_DSM_30007	97.7234	Acinetobacter baumannii
Acinetobacter_baumannii_1271213	Acinetobacter_baumannii_DSM_30007	97.7234	Acinetobacter baumannii
Acinetobacter_pittii_Ap-D8	Acinetobacter_pittii_ATCC_19004	97.7236	Acinetobacter pittii
Acinetobacter_baumannii_ABAY13013	Acinetobacter_baumannii_DSM_30007	97.7236	Acinetobacter baumannii
Acinetobacter_baumannii_CCBH26789	Acinetobacter_baumannii_DSM_30007	97.7237	Acinetobacter baumannii
Acinetobacter_baumannii_UH184_310	Acinetobacter_baumannii_ATCC_19606	97.7239	Acinetobacter baumannii
Acinetobacter_sp._FDAARGOS_558	Acinetobacter_baumannii_DSM_30007	97.7244	Acinetobacter baumannii
Acinetobacter_baumannii_Ab118	Acinetobacter_baumannii_DSM_30007	97.7244	Acinetobacter baumannii
Acinetobacter_baumannii_168_16	Acinetobacter_baumannii_DSM_30007	97.7245	Acinetobacter baumannii
Acinetobacter_baumannii_TG27387	Acinetobacter_baumannii_DSM_30007	97.7245	Acinetobacter baumannii
Acinetobacter_baumannii_AS012529	Acinetobacter_baumannii_CIP_70.34	97.7247	Acinetobacter baumannii
Acinetobacter_baumannii_SGH1101	Acinetobacter_baumannii_DSM_30007	97.7248	Acinetobacter baumannii
Acinetobacter_pittii_TUM16154	Acinetobacter_pittii_DSM_25618	97.7249	Acinetobacter pittii
Acinetobacter_baumannii_4300STDY7045864	Acinetobacter_baumannii_ATCC_19606	97.7251	Acinetobacter baumannii
Acinetobacter_baumannii_19A2701	Acinetobacter_baumannii_ATCC_19606	97.7253	Acinetobacter baumannii
Acinetobacter_baumannii_TG07725	Acinetobacter_baumannii_DSM_30007	97.7255	Acinetobacter baumannii
Acinetobacter_baumannii_BJAB0868	Acinetobacter_baumannii_ATCC_19606	97.7257	Acinetobacter baumannii
Acinetobacter_baumannii_WCHAB005078	Acinetobacter_baumannii_DSM_30007	97.7257	Acinetobacter baumannii
Acinetobacter_baumannii_901B6-12EESBL	Acinetobacter_baumannii_ATCC_19606	97.7257	Acinetobacter baumannii
Acinetobacter_baumannii_ARLG1314	Acinetobacter_baumannii_DSM_30007	97.7257	Acinetobacter baumannii
Acinetobacter_baumannii_Res13-Abat-PEA21-P4-01-A	Acinetobacter_baumannii_DSM_30007	97.7259	Acinetobacter baumannii
Acinetobacter_baumannii_Aci00709	Acinetobacter_baumannii_ATCC_19606	97.7261	Acinetobacter baumannii
Acinetobacter_baumannii_433H	Acinetobacter_baumannii_DSM_30007	97.7264	Acinetobacter baumannii
Acinetobacter_baumannii_RBH3	Acinetobacter_baumannii_DSM_30007	97.7267	Acinetobacter baumannii
Acinetobacter_baumannii_L066	Acinetobacter_baumannii_DSM_30007	97.727	Acinetobacter baumannii
Acinetobacter_baumannii_1499986	Acinetobacter_baumannii_ATCC_19606	97.7275	Acinetobacter baumannii
Acinetobacter_baumannii_ABUH797	Acinetobacter_baumannii_CIP_70.34	97.7277	Acinetobacter baumannii
Acinetobacter_nosocomialis_AN1	Acinetobacter_nosocomialis_LMG_10619	97.7278	Acinetobacter nosocomialis
Acinetobacter_baumannii_KCJ3K928	Acinetobacter_baumannii_DSM_30007	97.7278	Acinetobacter baumannii
Acinetobacter_baumannii_17A1762	Acinetobacter_baumannii_DSM_30007	97.7279	Acinetobacter baumannii
Acinetobacter_baumannii_ABNIH6	Acinetobacter_baumannii_DSM_30007	97.7282	Acinetobacter baumannii
Acinetobacter_baumannii_s214	Acinetobacter_baumannii_DSM_30007	97.7288	Acinetobacter baumannii
Acinetobacter_baumannii_ABUH650	Acinetobacter_baumannii_DSM_30007	97.7292	Acinetobacter baumannii
Acinetobacter_baumannii_UH13908	Acinetobacter_baumannii_ATCC_19606	97.7293	Acinetobacter baumannii
Acinetobacter_baumannii_397_16	Acinetobacter_baumannii_DSM_30007	97.7293	Acinetobacter baumannii
Acinetobacter_baumannii_ARLG1306	Acinetobacter_baumannii_ATCC_19606	97.7295	Acinetobacter baumannii
Acinetobacter_nosocomialis_CAC13	Acinetobacter_nosocomialis_LMG_10619	97.7295	Acinetobacter nosocomialis
Acinetobacter_baumannii_SP3561	Acinetobacter_baumannii_JCM_6841	97.7295	Acinetobacter baumannii
Acinetobacter_baumannii_11551	Acinetobacter_baumannii_DSM_30007	97.7296	Acinetobacter baumannii
Acinetobacter_baumannii_SP816	Acinetobacter_baumannii_DSM_30007	97.7297	Acinetobacter baumannii
Acinetobacter_baumannii_A375	Acinetobacter_baumannii_ATCC_19606	97.7307	Acinetobacter baumannii
Acinetobacter_baumannii_410_17	Acinetobacter_baumannii_ATCC_19606	97.7307	Acinetobacter baumannii
Acinetobacter_baumannii_MH5	Acinetobacter_baumannii_CIP_70.34	97.7307	Acinetobacter baumannii
Acinetobacter_baumannii_AS012725	Acinetobacter_baumannii_DSM_30007	97.7309	Acinetobacter baumannii
Acinetobacter_baumannii_213_16	Acinetobacter_baumannii_DSM_30007	97.7311	Acinetobacter baumannii
Acinetobacter_baumannii_MRSN_3942	Acinetobacter_baumannii_ATCC_19606	97.7311	Acinetobacter baumannii
Acinetobacter_pittii_St-14569-91	Acinetobacter_pittii_ATCC_19004	97.7311	Acinetobacter pittii
Acinetobacter_baumannii_ABBL004	Acinetobacter_baumannii_ATCC_19606	97.7312	Acinetobacter baumannii
Acinetobacter_baumannii_180_17	Acinetobacter_baumannii_ATCC_19606	97.7313	Acinetobacter baumannii
Acinetobacter_sp._RQ_Bin_15	Acinetobacter_nosocomialis_NIPH_2119	97.7313	Acinetobacter nosocomialis
Acinetobacter_baumannii_Aci00872	Acinetobacter_baumannii_DSM_30007	97.7314	Acinetobacter baumannii
Acinetobacter_baumannii_Ab120	Acinetobacter_baumannii_DSM_30007	97.7318	Acinetobacter baumannii
Acinetobacter_baumannii_A18	Acinetobacter_baumannii_DSM_30007	97.7318	Acinetobacter baumannii
Acinetobacter_baumannii_PR332	Acinetobacter_baumannii_CIP_70.34	97.7318	Acinetobacter baumannii
Acinetobacter_baumannii_ARLG1833	Acinetobacter_baumannii_DSM_30007	97.7319	Acinetobacter baumannii
Acinetobacter_baumannii_Aci00762	Acinetobacter_baumannii_DSM_30007	97.7321	Acinetobacter baumannii
Acinetobacter_sp._SH024	Acinetobacter_pittii_DSM_25618	97.7324	Acinetobacter pittii
Acinetobacter_nosocomialis_NBRC_110500	Acinetobacter_nosocomialis_LMG_10619	97.7324	Acinetobacter nosocomialis
Acinetobacter_baumannii_A278	Acinetobacter_baumannii_ATCC_19606	97.7325	Acinetobacter baumannii
Acinetobacter_baumannii_BR097	Acinetobacter_baumannii_DSM_30007	97.7327	Acinetobacter baumannii
Acinetobacter_baumannii_Ab243	Acinetobacter_baumannii_DSM_30007	97.7329	Acinetobacter baumannii
Acinetobacter_baumannii_ACIN00199	Acinetobacter_baumannii_DSM_30007	97.7329	Acinetobacter baumannii
Acinetobacter_baumannii_ORABAshR	Acinetobacter_baumannii_DSM_30007	97.7331	Acinetobacter baumannii
Acinetobacter_baumannii_AR_0045	Acinetobacter_baumannii_DSM_30007	97.7331	Acinetobacter baumannii
Acinetobacter_baumannii_6013150	Acinetobacter_baumannii_DSM_30007	97.7331	Acinetobacter baumannii
Acinetobacter_sp._CIP_101934	Acinetobacter_schindleri_CIP_107287	97.7332	Acinetobacter schindleri
Acinetobacter_baumannii_ABS104	Acinetobacter_baumannii_DSM_30007	97.7335	Acinetobacter baumannii
Acinetobacter_baumannii_ABUH562	Acinetobacter_baumannii_DSM_30007	97.7338	Acinetobacter baumannii
Acinetobacter_baumannii_G7	Acinetobacter_baumannii_DSM_30007	97.734	Acinetobacter baumannii
Acinetobacter_baumannii_USA15	Acinetobacter_baumannii_ATCC_19606	97.7343	Acinetobacter baumannii
Acinetobacter_baumannii_ACIN00161	Acinetobacter_baumannii_DSM_30007	97.7344	Acinetobacter baumannii
Acinetobacter_baumannii_ABUH693	Acinetobacter_baumannii_DSM_30007	97.7345	Acinetobacter baumannii
Acinetobacter_baumannii_4300STDY7045897	Acinetobacter_baumannii_ATCC_19606	97.7346	Acinetobacter baumannii
Acinetobacter_pittii_HDV312665	Acinetobacter_pittii_DSM_25618	97.7348	Acinetobacter pittii
Acinetobacter_baumannii_18A2124	Acinetobacter_baumannii_DSM_30007	97.7349	Acinetobacter baumannii
Acinetobacter_baumannii_4300STDY7045775	Acinetobacter_baumannii_ATCC_19606	97.7349	Acinetobacter baumannii
Acinetobacter_sp._YH12091	Acinetobacter_indicus_CIP_110367	97.735	Acinetobacter indicus
Acinetobacter_baumannii_4300STDY7045774	Acinetobacter_baumannii_JCM_6841	97.7352	Acinetobacter baumannii
Acinetobacter_baumannii_MRSN11669	Acinetobacter_baumannii_DSM_30007	97.7354	Acinetobacter baumannii
Acinetobacter_baumannii_Survcare014	Acinetobacter_baumannii_ATCC_19606	97.7354	Acinetobacter baumannii
Acinetobacter_baumannii_s211	Acinetobacter_baumannii_DSM_30007	97.7359	Acinetobacter baumannii
Acinetobacter_baumannii_XH764	Acinetobacter_baumannii_DSM_30007	97.736	Acinetobacter baumannii
Acinetobacter_pittii_2012N21-164	Acinetobacter_pittii_ATCC_19004	97.736	Acinetobacter pittii
Acinetobacter_baumannii_MRSN1183	Acinetobacter_baumannii_ATCC_19606	97.7361	Acinetobacter baumannii
Acinetobacter_baumannii_548_17	Acinetobacter_baumannii_DSM_30007	97.7361	Acinetobacter baumannii
Acinetobacter_baumannii_CCF11	Acinetobacter_baumannii_DSM_30007	97.7363	Acinetobacter baumannii
Acinetobacter_baumannii_397971	Acinetobacter_baumannii_DSM_30007	97.7365	Acinetobacter baumannii
Acinetobacter_baumannii_KAB21	Acinetobacter_baumannii_DSM_30007	97.7372	Acinetobacter baumannii
Acinetobacter_baumannii_4300STDY7045892	Acinetobacter_baumannii_ATCC_19606	97.7372	Acinetobacter baumannii
Acinetobacter_baumannii_NCTC13301	Acinetobacter_baumannii_DSM_30007	97.7374	Acinetobacter baumannii
Acinetobacter_baumannii_A39	Acinetobacter_baumannii_DSM_30007	97.7374	Acinetobacter baumannii
Acinetobacter_baumannii_403_16	Acinetobacter_baumannii_DSM_30007	97.7375	Acinetobacter baumannii
Acinetobacter_baumannii_MRSN_3405	Acinetobacter_baumannii_DSM_30007	97.7378	Acinetobacter baumannii
Acinetobacter_pittii_UKK-0245	Acinetobacter_pittii_DSM_25618	97.7378	Acinetobacter pittii
Acinetobacter_baumannii_B11911	Acinetobacter_baumannii_DSM_30007	97.738	Acinetobacter baumannii
Acinetobacter_indicus_AI14	Acinetobacter_indicus_CIP_110367	97.7381	Acinetobacter indicus
Acinetobacter_baumannii_AR_0052	Acinetobacter_baumannii_ATCC_19606	97.7384	Acinetobacter baumannii
Acinetobacter_baumannii_540_17	Acinetobacter_baumannii_CIP_70.34	97.7385	Acinetobacter baumannii
Acinetobacter_baumannii_Pesh-22	Acinetobacter_baumannii_ATCC_19606	97.7387	Acinetobacter baumannii
Acinetobacter_nosocomialis_TUM15142	Acinetobacter_nosocomialis_NIPH_2119	97.7391	Acinetobacter nosocomialis
Acinetobacter_baumannii_434H	Acinetobacter_baumannii_ATCC_19606	97.7394	Acinetobacter baumannii
Acinetobacter_baumannii_Ab107	Acinetobacter_baumannii_DSM_30007	97.7394	Acinetobacter baumannii
Acinetobacter_baumannii_UH455_62	Acinetobacter_baumannii_ATCC_19606	97.7394	Acinetobacter baumannii
Acinetobacter_baumannii_ABS062	Acinetobacter_baumannii_DSM_30007	97.7397	Acinetobacter baumannii
Acinetobacter_baumannii_Ab71	Acinetobacter_baumannii_DSM_30007	97.7398	Acinetobacter baumannii
Acinetobacter_baumannii_UH381_482	Acinetobacter_baumannii_DSM_30007	97.7402	Acinetobacter baumannii
Acinetobacter_baumannii_966_16	Acinetobacter_baumannii_DSM_30007	97.7403	Acinetobacter baumannii
Acinetobacter_baumannii_TG27311	Acinetobacter_baumannii_DSM_30007	97.7403	Acinetobacter baumannii
Acinetobacter_baumannii_MRSN31468	Acinetobacter_baumannii_ATCC_19606	97.7403	Acinetobacter baumannii
Acinetobacter_baumannii_ABUH633	Acinetobacter_baumannii_CIP_70.34	97.7405	Acinetobacter baumannii
Acinetobacter_baumannii_KAB16	Acinetobacter_baumannii_DSM_30007	97.7407	Acinetobacter baumannii
Acinetobacter_baumannii_M3AC9-7	Acinetobacter_baumannii_CIP_70.34	97.7408	Acinetobacter baumannii
Acinetobacter_pittii_ARLG1839	Acinetobacter_pittii_ATCC_19004	97.7408	Acinetobacter pittii
Acinetobacter_baumannii_AB0057	Acinetobacter_baumannii_DSM_30007	97.741	Acinetobacter baumannii
Acinetobacter_pittii_PR344	Acinetobacter_pittii_ATCC_19004	97.741	Acinetobacter pittii
Acinetobacter_baumannii_MRSN31196	Acinetobacter_baumannii_DSM_30007	97.7413	Acinetobacter baumannii
Acinetobacter_baumannii_WC-692	Acinetobacter_baumannii_ATCC_19606	97.7413	Acinetobacter baumannii
Acinetobacter_baumannii_ABAY12017	Acinetobacter_baumannii_DSM_30007	97.7417	Acinetobacter baumannii
Acinetobacter_baumannii_927_16	Acinetobacter_baumannii_DSM_30007	97.7419	Acinetobacter baumannii
Acinetobacter_baumannii_HUMC1	Acinetobacter_baumannii_JCM_6841	97.742	Acinetobacter baumannii
Acinetobacter_baumannii_5464	Acinetobacter_baumannii_DSM_30007	97.742	Acinetobacter baumannii
Acinetobacter_indicus_AI39	Acinetobacter_indicus_CIP_110367	97.7423	Acinetobacter indicus
Acinetobacter_baumannii_ATCC_BAA1605	Acinetobacter_baumannii_DSM_30007	97.7424	Acinetobacter baumannii
Acinetobacter_baumannii_ORABRicT	Acinetobacter_baumannii_ATCC_19606	97.7424	Acinetobacter baumannii
Acinetobacter_baumannii_MRSN11816	Acinetobacter_baumannii_ATCC_19606	97.7425	Acinetobacter baumannii
Acinetobacter_baumannii_ABAY11004	Acinetobacter_baumannii_DSM_30007	97.7426	Acinetobacter baumannii
Acinetobacter_baumannii_11536	Acinetobacter_baumannii_CIP_70.34	97.7428	Acinetobacter baumannii
Acinetobacter_haemolyticus_2227	Acinetobacter_haemolyticus_MTCC_9819	97.7428	Acinetobacter haemolyticus
Acinetobacter_baumannii_ACM-14	Acinetobacter_baumannii_DSM_30007	97.7429	Acinetobacter baumannii
Acinetobacter_baumannii_XH743	Acinetobacter_baumannii_DSM_30007	97.743	Acinetobacter baumannii
Acinetobacter_baumannii_527_16	Acinetobacter_baumannii_DSM_30007	97.743	Acinetobacter baumannii
Acinetobacter_baumannii_482_16	Acinetobacter_baumannii_DSM_30007	97.7431	Acinetobacter baumannii
Acinetobacter_baumannii_s213	Acinetobacter_baumannii_DSM_30007	97.7432	Acinetobacter baumannii
Acinetobacter_sp._EKM10A	Acinetobacter_baumannii_ATCC_19606	97.7434	Acinetobacter baumannii
Acinetobacter_baumannii_s219	Acinetobacter_baumannii_DSM_30007	97.7434	Acinetobacter baumannii
Acinetobacter_baumannii_Ab201	Acinetobacter_baumannii_DSM_30007	97.7435	Acinetobacter baumannii
Acinetobacter_sp._YH12134	Acinetobacter_indicus_CIP_110367	97.7435	Acinetobacter indicus
Acinetobacter_baumannii_AB_2007-16-25-01-7	Acinetobacter_baumannii_DSM_30007	97.7436	Acinetobacter baumannii
Acinetobacter_pittii_UBA2478	Acinetobacter_pittii_ATCC_19004	97.7436	Acinetobacter pittii
Acinetobacter_sp._1289694	Acinetobacter_pittii_ATCC_19004	97.7437	Acinetobacter pittii
Acinetobacter_baumannii_Ab238	Acinetobacter_baumannii_ATCC_19606	97.7438	Acinetobacter baumannii
Acinetobacter_baumannii_AC001-8-R1-S1	Acinetobacter_baumannii_DSM_30007	97.7444	Acinetobacter baumannii
Acinetobacter_indicus_AI36	Acinetobacter_indicus_CIP_110367	97.7444	Acinetobacter indicus
Acinetobacter_baumannii_UH384_450	Acinetobacter_baumannii_DSM_30007	97.7452	Acinetobacter baumannii
Acinetobacter_pittii_TG29420	Acinetobacter_pittii_ATCC_19004	97.7452	Acinetobacter pittii
Acinetobacter_baumannii_J5	Acinetobacter_baumannii_DSM_30007	97.7453	Acinetobacter baumannii
Acinetobacter_baumannii_13A422	Acinetobacter_baumannii_DSM_30007	97.7455	Acinetobacter baumannii
Acinetobacter_baumannii_ARLG-1775	Acinetobacter_baumannii_DSM_30007	97.7455	Acinetobacter baumannii
Acinetobacter_baumannii_ZQ3	Acinetobacter_baumannii_DSM_30007	97.7455	Acinetobacter baumannii
Acinetobacter_baumannii_Naval-13	Acinetobacter_baumannii_DSM_30007	97.7458	Acinetobacter baumannii
Acinetobacter_baumannii_ABUH612	Acinetobacter_baumannii_DSM_30007	97.7458	Acinetobacter baumannii
Acinetobacter_baumannii_19A2549	Acinetobacter_baumannii_DSM_30007	97.7459	Acinetobacter baumannii
Acinetobacter_baumannii_CCBH15815	Acinetobacter_baumannii_DSM_30007	97.7463	Acinetobacter baumannii
Acinetobacter_baumannii_6772166	Acinetobacter_baumannii_DSM_30007	97.7463	Acinetobacter baumannii
Acinetobacter_baumannii_WE1926	Acinetobacter_baumannii_ATCC_19606	97.7466	Acinetobacter baumannii
Acinetobacter_pittii_MCR16048	Acinetobacter_pittii_ATCC_19004	97.7466	Acinetobacter pittii
Acinetobacter_baumannii_18A2229	Acinetobacter_baumannii_DSM_30007	97.7468	Acinetobacter baumannii
Acinetobacter_baumannii_25569_7	Acinetobacter_baumannii_ATCC_19606	97.747	Acinetobacter baumannii
Acinetobacter_baumannii_AB_909-02-7	Acinetobacter_baumannii_DSM_30007	97.747	Acinetobacter baumannii
Acinetobacter_baumannii_Ab5038	Acinetobacter_baumannii_JCM_6841	97.747	Acinetobacter baumannii
Acinetobacter_baumannii_EGY	Acinetobacter_baumannii_ATCC_19606	97.7471	Acinetobacter baumannii
Acinetobacter_baumannii_4113	Acinetobacter_baumannii_DSM_30007	97.7471	Acinetobacter baumannii
Acinetobacter_baumannii_7835	Acinetobacter_baumannii_ATCC_19606	97.7473	Acinetobacter baumannii
Acinetobacter_baumannii_SGH0410	Acinetobacter_baumannii_DSM_30007	97.7474	Acinetobacter baumannii
Acinetobacter_baumannii_TG20277	Acinetobacter_baumannii_DSM_30007	97.7474	Acinetobacter baumannii
Acinetobacter_baumannii_AC15190	Acinetobacter_baumannii_DSM_30007	97.7475	Acinetobacter baumannii
Acinetobacter_baumannii_AB_TG2028	Acinetobacter_baumannii_DSM_30007	97.7475	Acinetobacter baumannii
Acinetobacter_baumannii_s212	Acinetobacter_baumannii_DSM_30007	97.7476	Acinetobacter baumannii
Acinetobacter_baumannii_NCTC13421	Acinetobacter_baumannii_DSM_30007	97.7476	Acinetobacter baumannii
Acinetobacter_baumannii_D2	Acinetobacter_baumannii_DSM_30007	97.7479	Acinetobacter baumannii
Acinetobacter_baumannii_FDAARGOS_123	Acinetobacter_baumannii_ATCC_19606	97.748	Acinetobacter baumannii
Acinetobacter_baumannii_4300STDY7045863	Acinetobacter_baumannii_DSM_30007	97.7483	Acinetobacter baumannii
Acinetobacter_baumannii_SGH0805	Acinetobacter_baumannii_DSM_30007	97.7483	Acinetobacter baumannii
Acinetobacter_baumannii_ARLG1940	Acinetobacter_baumannii_ATCC_19606	97.7483	Acinetobacter baumannii
Acinetobacter_baumannii_SGH0411	Acinetobacter_baumannii_DSM_30007	97.7488	Acinetobacter baumannii
Acinetobacter_baumannii_ABAY09013	Acinetobacter_baumannii_DSM_30007	97.7489	Acinetobacter baumannii
Acinetobacter_baumannii_MRSN4119	Acinetobacter_baumannii_DSM_30007	97.7492	Acinetobacter baumannii
Acinetobacter_baumannii_ABAY13008	Acinetobacter_baumannii_DSM_30007	97.7492	Acinetobacter baumannii
Acinetobacter_baumannii_MRSN32076	Acinetobacter_baumannii_DSM_30007	97.7493	Acinetobacter baumannii
Acinetobacter_baumannii_CHI-34	Acinetobacter_baumannii_DSM_30007	97.7494	Acinetobacter baumannii
Acinetobacter_baumannii_UH184_309	Acinetobacter_baumannii_ATCC_19606	97.7495	Acinetobacter baumannii
Acinetobacter_baumannii_66san	Acinetobacter_baumannii_DSM_30007	97.7495	Acinetobacter baumannii
Acinetobacter_baumannii_MarinaZ4	Acinetobacter_baumannii_DSM_30007	97.7497	Acinetobacter baumannii
Acinetobacter_baumannii_C1-874	Acinetobacter_baumannii_DSM_30007	97.7498	Acinetobacter baumannii
Acinetobacter_baumannii_TG84304	Acinetobacter_baumannii_DSM_30007	97.7498	Acinetobacter baumannii
Acinetobacter_baumannii_MRSN_56	Acinetobacter_baumannii_DSM_30007	97.7498	Acinetobacter baumannii
Acinetobacter_baumannii_972082	Acinetobacter_baumannii_ATCC_19606	97.7498	Acinetobacter baumannii
Acinetobacter_baumannii_TG22336	Acinetobacter_baumannii_DSM_30007	97.7498	Acinetobacter baumannii
Acinetobacter_baumannii_WC-A-92	Acinetobacter_baumannii_ATCC_19606	97.7499	Acinetobacter baumannii
Acinetobacter_baumannii_ABUH414	Acinetobacter_baumannii_DSM_30007	97.75	Acinetobacter baumannii
Acinetobacter_baumannii_Ab06	Acinetobacter_baumannii_ATCC_19606	97.75	Acinetobacter baumannii
Acinetobacter_baumannii_UH19608	Acinetobacter_baumannii_DSM_30007	97.7501	Acinetobacter baumannii
Acinetobacter_baumannii_TG22592	Acinetobacter_baumannii_DSM_30007	97.7501	Acinetobacter baumannii
Acinetobacter_baumannii_ARLG1840	Acinetobacter_baumannii_DSM_30007	97.7502	Acinetobacter baumannii
Acinetobacter_baumannii_ABAY12009	Acinetobacter_baumannii_CIP_70.34	97.7503	Acinetobacter baumannii
Acinetobacter_baumannii_Naval-81	Acinetobacter_baumannii_ATCC_19606	97.7504	Acinetobacter baumannii
Acinetobacter_baumannii_ABUH4837	Acinetobacter_baumannii_ATCC_19606	97.7505	Acinetobacter baumannii
Acinetobacter_baumannii_Aci00738	Acinetobacter_baumannii_DSM_30007	97.7505	Acinetobacter baumannii
Acinetobacter_baumannii_ARLG1874	Acinetobacter_baumannii_ATCC_19606	97.7505	Acinetobacter baumannii
Acinetobacter_baumannii_YMC2012_1_R79	Acinetobacter_baumannii_DSM_30007	97.7506	Acinetobacter baumannii
Acinetobacter_baumannii_KPC-SM-125	Acinetobacter_baumannii_DSM_30007	97.7512	Acinetobacter baumannii
Acinetobacter_baumannii_DT-1139	Acinetobacter_baumannii_DSM_30007	97.7514	Acinetobacter baumannii
Acinetobacter_baumannii_s221	Acinetobacter_baumannii_ATCC_19606	97.7518	Acinetobacter baumannii
Acinetobacter_baumannii_Ab4197	Acinetobacter_baumannii_CIP_70.34	97.7518	Acinetobacter baumannii
Acinetobacter_baumannii_AR_0070	Acinetobacter_baumannii_ATCC_19606	97.7519	Acinetobacter baumannii
Acinetobacter_baumannii_15A5	Acinetobacter_baumannii_DSM_30007	97.7521	Acinetobacter baumannii
Acinetobacter_baumannii_AF-401	Acinetobacter_baumannii_DSM_30007	97.7522	Acinetobacter baumannii
Acinetobacter_baumannii_UH535_423	Acinetobacter_baumannii_DSM_30007	97.7522	Acinetobacter baumannii
Acinetobacter_baumannii_2015ZJAB13	Acinetobacter_baumannii_ATCC_19606	97.7524	Acinetobacter baumannii
Acinetobacter_baumannii_ACIN00265	Acinetobacter_baumannii_CIP_70.34	97.7525	Acinetobacter baumannii
Acinetobacter_baumannii_CCF35	Acinetobacter_baumannii_DSM_30007	97.7526	Acinetobacter baumannii
Acinetobacter_sp._UBA5984	Acinetobacter_variabilis_NIPH_2171	97.7528	Acinetobacter variabilis
Acinetobacter_baumannii_abaum008	Acinetobacter_baumannii_DSM_30007	97.7531	Acinetobacter baumannii
Acinetobacter_baumannii_AB12	Acinetobacter_baumannii_DSM_30007	97.7532	Acinetobacter baumannii
Acinetobacter_baumannii_KAB8	Acinetobacter_baumannii_ATCC_19606	97.7533	Acinetobacter baumannii
Acinetobacter_baumannii_PR306	Acinetobacter_baumannii_DSM_30007	97.7533	Acinetobacter baumannii
Acinetobacter_baumannii_H170	Acinetobacter_baumannii_ATCC_19606	97.7533	Acinetobacter baumannii
Acinetobacter_baumannii_TG22636	Acinetobacter_baumannii_DSM_30007	97.7534	Acinetobacter baumannii
Acinetobacter_baumannii_MRSN32142	Acinetobacter_baumannii_DSM_30007	97.7536	Acinetobacter baumannii
[truncated: 4,641 more rows]
