# Supplementary material for: Genome-wide identification and oxacillinase OXA distribution characteristics of Acinetobacter spp. based on a global database
Source: Front Microbiol. 2023 Jun 1;14:1174200. doi: 10.3389/fmicb.2023.1174200 (PMC10267304; doi:10.3389/fmicb.2023.1174200)
Supplement: Supplementary file 2 [file Table_2.xlsx]

## Sheet: Sheet1
Table S2. The details of strains used in the study
Genome_name	Type_strain	ANI_value	Assignment_name (ANI≥95)	Assembly No.	FTP site	Isolation_source	Country	Host
Acinetobacter_sp._N54.MGS-139	Acinetobacter_calcoaceticus_CIP_81.8	73.8168	Acinetobacter_sp	GCA_000980495.1	https://ftp.ncbi.nlm.nih.gov/genomes/all/GCA/000/980/495/GCA_000980495.1_ASM98049v1	stool sample from 53 year old healthy female	blank	Homo sapiens
Acinetobacter_sp._DF3-8	Acinetobacter_indicus_CIP_110367	73.8189	Acinetobacter_sp	GCA_020515765.1	https://ftp.ncbi.nlm.nih.gov/genomes/all/GCA/020/515/765/GCA_020515765.1_ASM2051576v1	estuarine water [ENVO:01000301]	France: estuaire de l'Aulne (Rade de Brest)	blank
Acinetobacter_baumannii_4300STDY7045877	Acinetobacter_pseudolwoffii_ANC_5044	73.9088	Acinetobacter_sp	GCA_900496575.1	https://ftp.ncbi.nlm.nih.gov/genomes/all/GCA/900/496/575/GCA_900496575.1_24276_3_35	blank	blank	blank
Acinetobacter_baumannii_aba_imp	Acinetobacter_defluvii_WCHA30	73.9295	Acinetobacter_sp	GCA_901485035.1	https://ftp.ncbi.nlm.nih.gov/genomes/all/GCA/901/485/035/GCA_901485035.1_aba_imp_assembly	blank	blank	blank
Acinetobacter_marinus_ANC_3699	Acinetobacter_populi_PBJ7	76.7989	Acinetobacter_sp	GCA_900096915.1	https://ftp.ncbi.nlm.nih.gov/genomes/all/GCA/900/096/915/GCA_900096915.1_IMG-taxon_2671180220_annotated_assembly	blank	blank	blank
Acinetobacter_qingfengensis_CCUG_69710T	Acinetobacter_populi_PBJ7	77.9262	Acinetobacter_sp	GCA_008693185.1	https://ftp.ncbi.nlm.nih.gov/genomes/all/GCA/008/693/185/GCA_008693185.1_ASM869318v1	bark	China: Qingfeng	Populus
Acinetobacter_qingfengensis_ANC_4671	Acinetobacter_populi_PBJ7	77.9797	Acinetobacter_sp	GCA_001753595.1	https://ftp.ncbi.nlm.nih.gov/genomes/all/GCA/001/753/595/GCA_001753595.1_ASM175359v1	canker bark of Populus	China: Qingfeng, Puyang City	blank
Acinetobacter_apis_ANC_5114	Acinetobacter_rathckeae_EC24	78.3458	Acinetobacter_sp	GCA_900197575.1	https://ftp.ncbi.nlm.nih.gov/genomes/all/GCA/900/197/575/GCA_900197575.1_IMG-taxon_2690315601_annotated_assembly	blank	blank	blank
Acinetobacter_calcoaceticus_JUb89	Acinetobacter_pullicarnis_S23	78.4897	Acinetobacter_sp	GCA_004345325.1	https://ftp.ncbi.nlm.nih.gov/genomes/all/GCA/004/345/325/GCA_004345325.1_ASM434532v1	blank	blank	blank
Acinetobacter_sp._DSM_11652	Acinetobacter_shaoyimingii_323-1	79.1918	Acinetobacter_sp	GCA_900109815.1	https://ftp.ncbi.nlm.nih.gov/genomes/all/GCA/900/109/815/GCA_900109815.1_IMG-taxon_2651870317_annotated_assembly	blank	blank	blank
Acinetobacter_sp._YH12239	Acinetobacter_lanii_185	79.3075	Acinetobacter_sp	GCA_013417635.1	https://ftp.ncbi.nlm.nih.gov/genomes/all/GCA/013/417/635/GCA_013417635.1_ASM1341763v1	feces	China: Guangdong	pig
Acinetobacter_sp._YH16032	Acinetobacter_indicus_CIP_110367	79.5051	Acinetobacter_sp	GCA_013417345.1	https://ftp.ncbi.nlm.nih.gov/genomes/all/GCA/013/417/345/GCA_013417345.1_ASM1341734v1	dust	China: Hunan	blank
Acinetobacter_sp._Ver3	Acinetobacter_indicus_CIP_110367	79.7213	Acinetobacter_sp	GCA_000632455.1	https://ftp.ncbi.nlm.nih.gov/genomes/all/GCA/000/632/455/GCA_000632455.1_AcinetoVer3_1.0	Hypersaline water	Argentina: Laguna Verde, Catamarca	blank
Acinetobacter_sp._B51_2017_B51_2017	Acinetobacter_wanghuae_dk386	79.7701	Acinetobacter_sp	GCA_003711395.1	https://ftp.ncbi.nlm.nih.gov/genomes/all/GCA/003/711/395/GCA_003711395.1_ASM371139v1	fecal material	blank	cow
Acinetobacter_johnsonii_AJ1	Acinetobacter_seohaensis_DSM_16313	79.8172	Acinetobacter_sp	GCA_012371395.1	https://ftp.ncbi.nlm.nih.gov/genomes/all/GCA/012/371/395/GCA_012371395.1_ASM1237139v1	cow	China	blank
Acinetobacter_sp._ANC_4648	Acinetobacter_bohemicus_ANC_3994	79.8318	Acinetobacter_sp	GCA_002135345.1	https://ftp.ncbi.nlm.nih.gov/genomes/all/GCA/002/135/345/GCA_002135345.1_ASM213534v1	mud of a forest creek	Czech Republic: Kytin	blank
Acinetobacter_johnsonii_AJ-1	Acinetobacter_seohaensis_DSM_16313	79.8365	Acinetobacter_sp	GCA_013186005.1	https://ftp.ncbi.nlm.nih.gov/genomes/all/GCA/013/186/005/GCA_013186005.1_ASM1318600v1	blank	China	cow
Acinetobacter_sp._ANC_3832	Acinetobacter_piscicola_LW15	79.9302	Acinetobacter_sp	GCA_002135415.1	https://ftp.ncbi.nlm.nih.gov/genomes/all/GCA/002/135/415/GCA_002135415.1_ASM213541v1	creek water	Czech Republic: Krivoklatsko forestland	blank
Acinetobacter_sp._TGL-Y2	Acinetobacter_lanii_185	80.2049	Acinetobacter_sp	GCA_001612555.1	https://ftp.ncbi.nlm.nih.gov/genomes/all/GCA/001/612/555/GCA_001612555.1_ASM161255v1	frozen soil	China: Qinghai-Tibet Plateau	blank
Acinetobacter_sp._ANC_4558	Acinetobacter_equi_114	80.4772	Acinetobacter_sp	GCA_002135375.1	https://ftp.ncbi.nlm.nih.gov/genomes/all/GCA/002/135/375/GCA_002135375.1_ASM213537v1	forest soil	Czech Republic: Bohemian Forest	blank
Acinetobacter_sp._ANC_4999	Acinetobacter_bohemicus_ANC_3994	80.6872	Acinetobacter_sp	GCA_002135235.1	https://ftp.ncbi.nlm.nih.gov/genomes/all/GCA/002/135/235/GCA_002135235.1_ASM213523v1	mud from a seasonal forest creek	Czech Republic: Rychleby mountains	blank
Acinetobacter_sp._WCHAc010034	Acinetobacter_bouvetii_CIP_107468	81.6211	Acinetobacter_sp	GCA_001696615.3	https://ftp.ncbi.nlm.nih.gov/genomes/all/GCA/001/696/615/GCA_001696615.3_ASM169661v3	hospital sewage	China	blank
Acinetobacter_sp._RF15A	Acinetobacter_variabilis_NIPH_2171	82.7112	Acinetobacter_sp	GCA_007570885.1	https://ftp.ncbi.nlm.nih.gov/genomes/all/GCA/007/570/885/GCA_007570885.1_ASM757088v1	hospital pen floor	Ireland	blank
Acinetobacter_sp._RF15B	Acinetobacter_variabilis_NIPH_2171	82.7388	Acinetobacter_sp	GCA_007558235.1	https://ftp.ncbi.nlm.nih.gov/genomes/all/GCA/007/558/235/GCA_007558235.1_ASM755823v1	hospital pen floor	Ireland	blank
Acinetobacter_sp._10FS3-1	Acinetobacter_variabilis_NIPH_2171	83.0759	Acinetobacter_sp	GCA_013343215.1	https://ftp.ncbi.nlm.nih.gov/genomes/all/GCA/013/343/215/GCA_013343215.1_ASM1334321v1	feces	China:Guangdong	pig
Acinetobacter_bouvetii_SFB21	Acinetobacter_terrae_ANC_4282	83.3688	Acinetobacter_sp	GCA_902753875.1	https://ftp.ncbi.nlm.nih.gov/genomes/all/GCA/902/753/875/GCA_902753875.1_SFB21	blank	blank	blank
Acinetobacter_sp._NCu2D-2	Acinetobacter_wanghuae_dk386	83.3977	Acinetobacter_sp	GCA_001647675.1	https://ftp.ncbi.nlm.nih.gov/genomes/all/GCA/001/647/675/GCA_001647675.1_ASM164767v1	tracheal swab from cat-captured mouse	Germany: Wernigerode	Mus musculus
Acinetobacter_sp._SA01	Acinetobacter_terrae_ANC_4282	83.4735	Acinetobacter_sp	GCA_011319235.1	https://ftp.ncbi.nlm.nih.gov/genomes/all/GCA/011/319/235/GCA_011319235.1_ASM1131923v1	petroleum contaminated waste water	Iran: Baghershahr, Tehran	blank
Acinetobacter_sp._YH16039	Acinetobacter_terrae_ANC_4282	83.4893	Acinetobacter_sp	GCA_013417255.1	https://ftp.ncbi.nlm.nih.gov/genomes/all/GCA/013/417/255/GCA_013417255.1_ASM1341725v1	sewage	China: Hunan	blank
Acinetobacter_sp._ANC_4218	Acinetobacter_terrae_ANC_4282	83.5325	Acinetobacter_sp	GCA_002135245.1	https://ftp.ncbi.nlm.nih.gov/genomes/all/GCA/002/135/245/GCA_002135245.1_ASM213524v1	clayey mud of a drained pond	Czech Republic: Hostivice	blank
Acinetobacter_sp._ANC_4216	Acinetobacter_terrae_ANC_4282	83.5367	Acinetobacter_sp	GCA_004331195.1	https://ftp.ncbi.nlm.nih.gov/genomes/all/GCA/004/331/195/GCA_004331195.1_ASM433119v1	clayey mud of a drained pond	Czech Republic: Hostivice	blank
Acinetobacter_sp._YH01018	Acinetobacter_terrestris_ANC_4471	83.561	Acinetobacter_sp	GCA_013420295.1	https://ftp.ncbi.nlm.nih.gov/genomes/all/GCA/013/420/295/GCA_013420295.1_ASM1342029v1	feces	China: Jiangsu	pig
Acinetobacter_sp._CS-2	Acinetobacter_terrae_ANC_4282	83.5622	Acinetobacter_sp	GCA_016599715.1	https://ftp.ncbi.nlm.nih.gov/genomes/all/GCA/016/599/715/GCA_016599715.1_ASM1659971v1	Hospital wastewater	China	Homo sapiens
Acinetobacter_haemolyticus_w12	Acinetobacter_terrae_ANC_4282	83.6179	Acinetobacter_sp	GCA_020616635.1	https://ftp.ncbi.nlm.nih.gov/genomes/all/GCA/020/616/635/GCA_020616635.1_ASM2061663v1	water	China:Tianjin	blank
Acinetobacter_sp._YH01022	Acinetobacter_terrae_ANC_4282	83.6489	Acinetobacter_sp	GCA_013420235.1	https://ftp.ncbi.nlm.nih.gov/genomes/all/GCA/013/420/235/GCA_013420235.1_ASM1342023v1	soil	China: Zhejiang	blank
Acinetobacter_kookii_ANC_4667	Acinetobacter_terrae_ANC_4282	83.6508	Acinetobacter_sp	GCA_900096895.1	https://ftp.ncbi.nlm.nih.gov/genomes/all/GCA/900/096/895/GCA_900096895.1_IMG-taxon_2671180219_annotated_assembly	blank	blank	blank
Acinetobacter_sp._YH01016	Acinetobacter_terrae_ANC_4282	83.6513	Acinetobacter_sp	GCA_013420305.1	https://ftp.ncbi.nlm.nih.gov/genomes/all/GCA/013/420/305/GCA_013420305.1_ASM1342030v1	feces	China: Jiangsu	pig
Acinetobacter_sp._ANC_3813	Acinetobacter_bouvetii_CIP_107468	83.8722	Acinetobacter_sp	GCA_002135435.1	https://ftp.ncbi.nlm.nih.gov/genomes/all/GCA/002/135/435/GCA_002135435.1_ASM213543v1	water with sediment from a forest pond	Czech Republic: Czech Forest mountains	blank
Acinetobacter_sp._ANC_5054	Acinetobacter_gandensis_CCUG_68482	83.9737	Acinetobacter_sp	GCA_002135295.1	https://ftp.ncbi.nlm.nih.gov/genomes/all/GCA/002/135/295/GCA_002135295.1_ASM213529v1	sediment with water of forest creek	Czech Republic: Mohelno	blank
Acinetobacter_sp._ANC_4945	Acinetobacter_gandensis_CCUG_68482	84.4055	Acinetobacter_sp	GCA_002018365.1	https://ftp.ncbi.nlm.nih.gov/genomes/all/GCA/002/018/365/GCA_002018365.1_ASM201836v1	Soil	Indonesia: Sumatra	blank
Acinetobacter_sp._ANC_3903	Acinetobacter_terrae_ANC_4282	84.4083	Acinetobacter_sp	GCA_002135315.1	https://ftp.ncbi.nlm.nih.gov/genomes/all/GCA/002/135/315/GCA_002135315.1_ASM213531v1	water with mud from a forest pond	Czech Republic: Neumetely	blank
Acinetobacter_sp._Marseille-P8049	Acinetobacter_ursingii_DSM_16037	84.5212	Acinetobacter_sp	GCA_900625095.1	https://ftp.ncbi.nlm.nih.gov/genomes/all/GCA/900/625/095/GCA_900625095.1_PRJEB29216	blood	blank	blank
Acinetobacter_beijerinckii_LMO_Bin59	Acinetobacter_junii_CIP_64.5	84.5286	Acinetobacter_sp	GCA_013530575.1	https://ftp.ncbi.nlm.nih.gov/genomes/all/GCA/013/530/575/GCA_013530575.1_ASM1353057v1	marine sediment; cultured under 152Mpa pressure	Pacific Ocean: Mariana trench	blank
Acinetobacter_beijerinckii_GTC_14628	Acinetobacter_junii_CIP_64.5	84.5473	Acinetobacter_sp	GCA_000931715.1	https://ftp.ncbi.nlm.nih.gov/genomes/all/GCA/000/931/715/GCA_000931715.1_ASM93171v1	blank	blank	blank
Acinetobacter_sp._ANC_4169	Acinetobacter_terrae_ANC_4282	84.6134	Acinetobacter_sp	GCA_002135355.1	https://ftp.ncbi.nlm.nih.gov/genomes/all/GCA/002/135/355/GCA_002135355.1_ASM213535v1	mud of a creek bank	Czech Republic: Petrovice	blank
Acinetobacter_beijerinckii_ANC_3835	Acinetobacter_junii_CIP_64.5	84.6399	Acinetobacter_sp	GCA_000368985.1	https://ftp.ncbi.nlm.nih.gov/genomes/all/GCA/000/368/985/GCA_000368985.1_Acin_beij_ANC_3835_V1	blank	blank	blank
Acinetobacter_sp._UBA3106	Acinetobacter_terrae_ANC_4282	84.6523	Acinetobacter_sp	GCA_002365595.1	https://ftp.ncbi.nlm.nih.gov/genomes/all/GCA/002/365/595/GCA_002365595.1_ASM236559v1	metal	USA:New York City	blank
Acinetobacter_beijerinckii_CIP_110307	Acinetobacter_junii_CIP_64.5	84.6827	Acinetobacter_sp	GCA_000369005.1	https://ftp.ncbi.nlm.nih.gov/genomes/all/GCA/000/369/005/GCA_000369005.1_Acin_beij_CIP_110307_V1	blank	blank	blank
Acinetobacter_sp._YH12154	Acinetobacter_gandensis_ANC_4275	84.7006	Acinetobacter_sp	GCA_013418265.1	https://ftp.ncbi.nlm.nih.gov/genomes/all/GCA/013/418/265/GCA_013418265.1_ASM1341826v1	feces	China: Zhejiang	pig
Acinetobacter_sp._YH12070	Acinetobacter_gandensis_CCUG_68482	84.7099	Acinetobacter_sp	GCA_013419625.1	https://ftp.ncbi.nlm.nih.gov/genomes/all/GCA/013/419/625/GCA_013419625.1_ASM1341962v1	feces	China: Fujian	pig
Acinetobacter_cumulans_AC1	Acinetobacter_gandensis_ANC_4275	84.7115	Acinetobacter_sp	GCA_012371365.1	https://ftp.ncbi.nlm.nih.gov/genomes/all/GCA/012/371/365/GCA_012371365.1_ASM1237136v1	cow	China	blank
Acinetobacter_sp._YH12087	Acinetobacter_gandensis_CCUG_68482	84.7227	Acinetobacter_sp	GCA_013419355.1	https://ftp.ncbi.nlm.nih.gov/genomes/all/GCA/013/419/355/GCA_013419355.1_ASM1341935v1	feces	China: Hunan	pig
Acinetobacter_sp._YH12231	Acinetobacter_gandensis_ANC_4275	84.7322	Acinetobacter_sp	GCA_013417755.1	https://ftp.ncbi.nlm.nih.gov/genomes/all/GCA/013/417/755/GCA_013417755.1_ASM1341775v1	feces	China: Hunan	pig
Acinetobacter_sp._YH12152	Acinetobacter_gandensis_ANC_4275	84.7337	Acinetobacter_sp	GCA_013418285.1	https://ftp.ncbi.nlm.nih.gov/genomes/all/GCA/013/418/285/GCA_013418285.1_ASM1341828v1	feces	China: Zhejiang	pig
Acinetobacter_sp._YH12218	Acinetobacter_gandensis_CCUG_68482	84.738	Acinetobacter_sp	GCA_013417925.1	https://ftp.ncbi.nlm.nih.gov/genomes/all/GCA/013/417/925/GCA_013417925.1_ASM1341792v1	feces	China: Zhejiang	pig
Acinetobacter_sp._YH12097	Acinetobacter_gandensis_CCUG_68482	84.7477	Acinetobacter_sp	GCA_013419225.1	https://ftp.ncbi.nlm.nih.gov/genomes/all/GCA/013/419/225/GCA_013419225.1_ASM1341922v1	feces	China: Guangdong	pig
Acinetobacter_sp._YH01009	Acinetobacter_gandensis_ANC_4275	84.7502	Acinetobacter_sp	GCA_013420765.1	https://ftp.ncbi.nlm.nih.gov/genomes/all/GCA/013/420/765/GCA_013420765.1_ASM1342076v1	feces	China: Jiangsu	pig
Acinetobacter_sp._YH16056	Acinetobacter_gandensis_CCUG_68482	84.7988	Acinetobacter_sp	GCA_013417055.1	https://ftp.ncbi.nlm.nih.gov/genomes/all/GCA/013/417/055/GCA_013417055.1_ASM1341705v1	soil	China: Hunan	blank
Acinetobacter_sp._YH12250	Acinetobacter_gandensis_ANC_4275	84.802	Acinetobacter_sp	GCA_013417435.1	https://ftp.ncbi.nlm.nih.gov/genomes/all/GCA/013/417/435/GCA_013417435.1_ASM1341743v1	feces	China: Guangdong	pig
Acinetobacter_sp._YH12039	Acinetobacter_gandensis_ANC_4275	84.8044	Acinetobacter_sp	GCA_013420015.1	https://ftp.ncbi.nlm.nih.gov/genomes/all/GCA/013/420/015/GCA_013420015.1_ASM1342001v1	feces	China: Jiangxi	pig
Acinetobacter_sp._YH12052	Acinetobacter_gandensis_CCUG_68482	84.8137	Acinetobacter_sp	GCA_013419835.1	https://ftp.ncbi.nlm.nih.gov/genomes/all/GCA/013/419/835/GCA_013419835.1_ASM1341983v1	feces	China: Jiangxi	pig
Acinetobacter_sp._YH12036	Acinetobacter_gandensis_CCUG_68482	84.816	Acinetobacter_sp	GCA_013419995.1	https://ftp.ncbi.nlm.nih.gov/genomes/all/GCA/013/419/995/GCA_013419995.1_ASM1341999v1	feces	China: Fujian	pig
Acinetobacter_sp._YH12142	Acinetobacter_gandensis_ANC_4275	84.8174	Acinetobacter_sp	GCA_013418435.1	https://ftp.ncbi.nlm.nih.gov/genomes/all/GCA/013/418/435/GCA_013418435.1_ASM1341843v1	feces	China: Hainan	pig
Acinetobacter_sp._YH01010	Acinetobacter_gandensis_ANC_4275	84.8213	Acinetobacter_sp	GCA_013420775.1	https://ftp.ncbi.nlm.nih.gov/genomes/all/GCA/013/420/775/GCA_013420775.1_ASM1342077v1	feces	China: Jiangsu	pig
Acinetobacter_sp._YH12054	Acinetobacter_gandensis_CCUG_68482	84.8252	Acinetobacter_sp	GCA_013419795.1	https://ftp.ncbi.nlm.nih.gov/genomes/all/GCA/013/419/795/GCA_013419795.1_ASM1341979v1	feces	China: Jiangxi	pig
Acinetobacter_sp._YH16040	Acinetobacter_gandensis_CCUG_68482	84.8326	Acinetobacter_sp	GCA_013417235.1	https://ftp.ncbi.nlm.nih.gov/genomes/all/GCA/013/417/235/GCA_013417235.1_ASM1341723v1	feces	China: Jiangxi	pig
Acinetobacter_sp._YH12109	Acinetobacter_gandensis_ANC_4275	84.8346	Acinetobacter_sp	GCA_013419025.1	https://ftp.ncbi.nlm.nih.gov/genomes/all/GCA/013/419/025/GCA_013419025.1_ASM1341902v1	feces	China: Jiangsu	pig
Acinetobacter_sp._YH12082	Acinetobacter_gandensis_CCUG_68482	84.8446	Acinetobacter_sp	GCA_013419425.1	https://ftp.ncbi.nlm.nih.gov/genomes/all/GCA/013/419/425/GCA_013419425.1_ASM1341942v1	feces	China: Jiangxi	pig
Acinetobacter_baumannii_PL81	Acinetobacter_junii_CIP_64.5	84.8486	Acinetobacter_sp	GCA_012935345.2	https://ftp.ncbi.nlm.nih.gov/genomes/all/GCA/012/935/345/GCA_012935345.2_ASM1293534v2	leaves	Netherlands	Lettuce
Acinetobacter_sp._YH12096	Acinetobacter_gandensis_ANC_4275	84.8502	Acinetobacter_sp	GCA_013419215.1	https://ftp.ncbi.nlm.nih.gov/genomes/all/GCA/013/419/215/GCA_013419215.1_ASM1341921v1	feces	China: Guangdong	pig
Acinetobacter_sp._YH16055	Acinetobacter_gandensis_CCUG_68482	84.8564	Acinetobacter_sp	GCA_013417045.1	https://ftp.ncbi.nlm.nih.gov/genomes/all/GCA/013/417/045/GCA_013417045.1_ASM1341704v1	feces	China: Jiangxi	pig
Acinetobacter_sp._CFCC_10889	Acinetobacter_defluvii_WCHA30	84.8642	Acinetobacter_sp	GCA_003268395.1	https://ftp.ncbi.nlm.nih.gov/genomes/all/GCA/003/268/395/GCA_003268395.1_ASM326839v1	Poplar canker	China	blank
Acinetobacter_sp._YH12094	Acinetobacter_gandensis_CCUG_68482	84.8642	Acinetobacter_sp	GCA_013419295.1	https://ftp.ncbi.nlm.nih.gov/genomes/all/GCA/013/419/295/GCA_013419295.1_ASM1341929v1	feces	China: Guangdong	pig
Acinetobacter_sp._YH12062	Acinetobacter_gandensis_ANC_4275	84.8747	Acinetobacter_sp	GCA_013419725.1	https://ftp.ncbi.nlm.nih.gov/genomes/all/GCA/013/419/725/GCA_013419725.1_ASM1341972v1	feces	China: Jiangxi	pig
Acinetobacter_sp._YH12064	Acinetobacter_gandensis_ANC_4275	84.8765	Acinetobacter_sp	GCA_013419735.1	https://ftp.ncbi.nlm.nih.gov/genomes/all/GCA/013/419/735/GCA_013419735.1_ASM1341973v1	soil	China: Jiangxi	blank
Acinetobacter_sp._YH12219	Acinetobacter_gandensis_CCUG_68482	84.8806	Acinetobacter_sp	GCA_013417875.1	https://ftp.ncbi.nlm.nih.gov/genomes/all/GCA/013/417/875/GCA_013417875.1_ASM1341787v1	feces	China: Jiangxi	pig
Acinetobacter_sp._YH16057	Acinetobacter_gandensis_CCUG_68482	84.8857	Acinetobacter_sp	GCA_013417075.1	https://ftp.ncbi.nlm.nih.gov/genomes/all/GCA/013/417/075/GCA_013417075.1_ASM1341707v1	feces	China: Hunan	pig
Acinetobacter_sp._YH01020	Acinetobacter_gandensis_CCUG_68482	84.8884	Acinetobacter_sp	GCA_013420275.1	https://ftp.ncbi.nlm.nih.gov/genomes/all/GCA/013/420/275/GCA_013420275.1_ASM1342027v1	feces	China: Zhejiang	pig
Acinetobacter_sp._YH12144	Acinetobacter_gandensis_CCUG_68482	84.8903	Acinetobacter_sp	GCA_013418345.1	https://ftp.ncbi.nlm.nih.gov/genomes/all/GCA/013/418/345/GCA_013418345.1_ASM1341834v1	feces	China: Hainan	pig
Acinetobacter_sp._YH12063	Acinetobacter_gandensis_ANC_4275	84.8979	Acinetobacter_sp	GCA_013419715.1	https://ftp.ncbi.nlm.nih.gov/genomes/all/GCA/013/419/715/GCA_013419715.1_ASM1341971v1	feces	China: Jiangxi	pig
Acinetobacter_sp._YH12083	Acinetobacter_gandensis_CCUG_68482	84.9013	Acinetobacter_sp	GCA_013419445.1	https://ftp.ncbi.nlm.nih.gov/genomes/all/GCA/013/419/445/GCA_013419445.1_ASM1341944v1	feces	China: Jiangxi	pig
Acinetobacter_sp._YH12027	Acinetobacter_gandensis_CCUG_68482	84.9129	Acinetobacter_sp	GCA_013420085.1	https://ftp.ncbi.nlm.nih.gov/genomes/all/GCA/013/420/085/GCA_013420085.1_ASM1342008v1	feces	China: Fujian	pig
Acinetobacter_sp._YH12080	Acinetobacter_gandensis_CCUG_68482	84.9178	Acinetobacter_sp	GCA_013419455.1	https://ftp.ncbi.nlm.nih.gov/genomes/all/GCA/013/419/455/GCA_013419455.1_ASM1341945v1	feces	China: Jiangxi	pig
Acinetobacter_sp._YH16042	Acinetobacter_gandensis_CCUG_68482	84.918	Acinetobacter_sp	GCA_013417245.1	https://ftp.ncbi.nlm.nih.gov/genomes/all/GCA/013/417/245/GCA_013417245.1_ASM1341724v1	feces	China: Hunan	pig
Acinetobacter_sp._YH12061	Acinetobacter_gandensis_ANC_4275	84.9215	Acinetobacter_sp	GCA_013419745.1	https://ftp.ncbi.nlm.nih.gov/genomes/all/GCA/013/419/745/GCA_013419745.1_ASM1341974v1	feces	China: Jiangxi	pig
Acinetobacter_sp._YH16044	Acinetobacter_gandensis_CCUG_68482	84.9249	Acinetobacter_sp	GCA_013417145.1	https://ftp.ncbi.nlm.nih.gov/genomes/all/GCA/013/417/145/GCA_013417145.1_ASM1341714v1	feces	China: Jiangxi	pig
Acinetobacter_sp._YH12081	Acinetobacter_gandensis_CCUG_68482	84.9295	Acinetobacter_sp	GCA_013419465.1	https://ftp.ncbi.nlm.nih.gov/genomes/all/GCA/013/419/465/GCA_013419465.1_ASM1341946v1	feces	China: Jiangxi	pig
Acinetobacter_sp._CFCC_11171	Acinetobacter_gandensis_CCUG_68482	84.9296	Acinetobacter_sp	GCA_003268405.1	https://ftp.ncbi.nlm.nih.gov/genomes/all/GCA/003/268/405/GCA_003268405.1_ASM326840v1	Poplar canker	China	blank
Acinetobacter_sp._YH12140	Acinetobacter_gandensis_CCUG_68482	84.9402	Acinetobacter_sp	GCA_013418475.1	https://ftp.ncbi.nlm.nih.gov/genomes/all/GCA/013/418/475/GCA_013418475.1_ASM1341847v1	feces	China: Hainan	pig
Acinetobacter_sp._YH1901130	Acinetobacter_gandensis_CCUG_68482	84.9458	Acinetobacter_sp	GCA_013416955.1	https://ftp.ncbi.nlm.nih.gov/genomes/all/GCA/013/416/955/GCA_013416955.1_ASM1341695v1	feces	China: Fujian	pig
Acinetobacter_sp._YH12025	Acinetobacter_gandensis_CCUG_68482	84.9492	Acinetobacter_sp	GCA_013420075.1	https://ftp.ncbi.nlm.nih.gov/genomes/all/GCA/013/420/075/GCA_013420075.1_ASM1342007v1	dust	China: Fujian	blank
Acinetobacter_sp._YH01024	Acinetobacter_gandensis_CCUG_68482	84.9506	Acinetobacter_sp	GCA_013420195.1	https://ftp.ncbi.nlm.nih.gov/genomes/all/GCA/013/420/195/GCA_013420195.1_ASM1342019v1	feces	China: Zhejiang	pig
Acinetobacter_sp._YH12049	Acinetobacter_gandensis_CCUG_68482	84.9571	Acinetobacter_sp	GCA_013419875.1	https://ftp.ncbi.nlm.nih.gov/genomes/all/GCA/013/419/875/GCA_013419875.1_ASM1341987v1	feces	China: Jiangxi	pig
Acinetobacter_sp._YH12057	Acinetobacter_gandensis_ANC_4275	84.9602	Acinetobacter_sp	GCA_013419845.1	https://ftp.ncbi.nlm.nih.gov/genomes/all/GCA/013/419/845/GCA_013419845.1_ASM1341984v1	feces	China: Jiangxi	pig
Acinetobacter_sp._YH12085	Acinetobacter_gandensis_CCUG_68482	84.968	Acinetobacter_sp	GCA_013419415.1	https://ftp.ncbi.nlm.nih.gov/genomes/all/GCA/013/419/415/GCA_013419415.1_ASM1341941v1	feces	China: Fujian	pig
Acinetobacter_sp._YH12073	Acinetobacter_gandensis_CCUG_68482	84.9712	Acinetobacter_sp	GCA_013419535.1	https://ftp.ncbi.nlm.nih.gov/genomes/all/GCA/013/419/535/GCA_013419535.1_ASM1341953v1	feces	China: Guangdong	pig
Acinetobacter_sp._YH01005	Acinetobacter_gandensis_CCUG_68482	84.9748	Acinetobacter_sp	GCA_013420465.1	https://ftp.ncbi.nlm.nih.gov/genomes/all/GCA/013/420/465/GCA_013420465.1_ASM1342046v1	sewage	China: Shanghai	blank
Acinetobacter_sp._YH12138	Acinetobacter_gandensis_ANC_4275	84.9776	Acinetobacter_sp	GCA_013418445.1	https://ftp.ncbi.nlm.nih.gov/genomes/all/GCA/013/418/445/GCA_013418445.1_ASM1341844v1	feces	China: Hainan	pig
Acinetobacter_sp._ANC_5600	Acinetobacter_gandensis_CCUG_68482	84.9791	Acinetobacter_sp	GCA_002018395.1	https://ftp.ncbi.nlm.nih.gov/genomes/all/GCA/002/018/395/GCA_002018395.1_ASM201839v1	stool	Lebanon: Akkar	cow
Acinetobacter_sp._YH12069	Acinetobacter_gandensis_ANC_4275	84.9841	Acinetobacter_sp	GCA_013419675.1	https://ftp.ncbi.nlm.nih.gov/genomes/all/GCA/013/419/675/GCA_013419675.1_ASM1341967v1	feces	China: Fujian	pig
Acinetobacter_sp._YH12123	Acinetobacter_gandensis_CCUG_68482	84.9877	Acinetobacter_sp	GCA_013418805.1	https://ftp.ncbi.nlm.nih.gov/genomes/all/GCA/013/418/805/GCA_013418805.1_ASM1341880v1	feces	China: Zhejiang	pig
Acinetobacter_sp._YH12129	Acinetobacter_gandensis_CCUG_68482	85.0022	Acinetobacter_sp	GCA_013418685.1	https://ftp.ncbi.nlm.nih.gov/genomes/all/GCA/013/418/685/GCA_013418685.1_ASM1341868v1	feces	China: Hainan	pig
Acinetobacter_sp._YH12128	Acinetobacter_gandensis_CCUG_68482	85.0046	Acinetobacter_sp	GCA_013418655.1	https://ftp.ncbi.nlm.nih.gov/genomes/all/GCA/013/418/655/GCA_013418655.1_ASM1341865v1	feces	China: Hainan	pig
Acinetobacter_sp._YH16037	Acinetobacter_gandensis_CCUG_68482	85.0058	Acinetobacter_sp	GCA_013417265.1	https://ftp.ncbi.nlm.nih.gov/genomes/all/GCA/013/417/265/GCA_013417265.1_ASM1341726v1	feces	China: Hunan	pig
Acinetobacter_sp._YH12040	Acinetobacter_gandensis_ANC_4275	85.0275	Acinetobacter_sp	GCA_013420005.1	https://ftp.ncbi.nlm.nih.gov/genomes/all/GCA/013/420/005/GCA_013420005.1_ASM1342000v1	feces	China: Guangdong	pig
Acinetobacter_sp._YH12251	Acinetobacter_gandensis_ANC_4275	85.0288	Acinetobacter_sp	GCA_013417465.1	https://ftp.ncbi.nlm.nih.gov/genomes/all/GCA/013/417/465/GCA_013417465.1_ASM1341746v1	feces	China: Guangdong	pig
Acinetobacter_sp._YH12086	Acinetobacter_gandensis_CCUG_68482	85.0578	Acinetobacter_sp	GCA_013419345.1	https://ftp.ncbi.nlm.nih.gov/genomes/all/GCA/013/419/345/GCA_013419345.1_ASM1341934v1	feces	China: Hunan	pig
Acinetobacter_sp._YH12138_YH12138_T	Acinetobacter_gandensis_ANC_4275	85.0628	Acinetobacter_sp	GCA_015218525.1	https://ftp.ncbi.nlm.nih.gov/genomes/all/GCA/015/218/525/GCA_015218525.1_ASM1521852v1	feces	China: Hainan	Pig
Acinetobacter_sp._YH1901134	Acinetobacter_gandensis_ANC_4275	85.0653	Acinetobacter_sp	GCA_013416965.1	https://ftp.ncbi.nlm.nih.gov/genomes/all/GCA/013/416/965/GCA_013416965.1_ASM1341696v1	feces	China: Jiangxi	pig
Acinetobacter_sp._YH12066	Acinetobacter_gandensis_CCUG_68482	85.0676	Acinetobacter_sp	GCA_013419685.1	https://ftp.ncbi.nlm.nih.gov/genomes/all/GCA/013/419/685/GCA_013419685.1_ASM1341968v1	feces	China: Jiangxi	pig
Acinetobacter_sp._YH12045	Acinetobacter_gandensis_CCUG_68482	85.076	Acinetobacter_sp	GCA_013419925.1	https://ftp.ncbi.nlm.nih.gov/genomes/all/GCA/013/419/925/GCA_013419925.1_ASM1341992v1	feces	China: Guangdong	pig
Acinetobacter_sp._MB5	Acinetobacter_brisouii_CIP_110357	85.0791	Acinetobacter_sp	GCA_003261585.1	https://ftp.ncbi.nlm.nih.gov/genomes/all/GCA/003/261/585/GCA_003261585.1_ASM326158v1	mangrove soil	India: Andaman Islands	blank
Acinetobacter_sp._YH12126	Acinetobacter_gandensis_CCUG_68482	85.1008	Acinetobacter_sp	GCA_013418745.1	https://ftp.ncbi.nlm.nih.gov/genomes/all/GCA/013/418/745/GCA_013418745.1_ASM1341874v1	feces	China: Hainan	pig
Acinetobacter_sp._YH12210	Acinetobacter_sichuanensis_WCHAc060041	85.1152	Acinetobacter_sp	GCA_013418025.1	https://ftp.ncbi.nlm.nih.gov/genomes/all/GCA/013/418/025/GCA_013418025.1_ASM1341802v1	soil	China: Zhejiang	blank
Acinetobacter_sp._YH12207	Acinetobacter_sichuanensis_WCHAc060041	85.117	Acinetobacter_sp	GCA_013418085.1	https://ftp.ncbi.nlm.nih.gov/genomes/all/GCA/013/418/085/GCA_013418085.1_ASM1341808v1	feces	China: Zhejiang	pig
Acinetobacter_sp._YH12145	Acinetobacter_gandensis_CCUG_68482	85.1355	Acinetobacter_sp	GCA_013418335.1	https://ftp.ncbi.nlm.nih.gov/genomes/all/GCA/013/418/335/GCA_013418335.1_ASM1341833v1	feces	China: Jiangxi	pig
Acinetobacter_brisouii_TUM15068	Acinetobacter_brisouii_CIP_110357	85.1483	Acinetobacter_sp	GCA_008980645.1	https://ftp.ncbi.nlm.nih.gov/genomes/all/GCA/008/980/645/GCA_008980645.1_ASM898064v1	human sputum	Japan:Tokyo	Homo sapiens
Acinetobacter_sp._YH12209	Acinetobacter_sichuanensis_WCHAc060041	85.1484	Acinetobacter_sp	GCA_013418065.1	https://ftp.ncbi.nlm.nih.gov/genomes/all/GCA/013/418/065/GCA_013418065.1_ASM1341806v1	soil	China: Zhejiang	blank
Acinetobacter_sp._YH12068	Acinetobacter_gandensis_ANC_4275	85.1547	Acinetobacter_sp	GCA_013419635.1	https://ftp.ncbi.nlm.nih.gov/genomes/all/GCA/013/419/635/GCA_013419635.1_ASM1341963v1	feces	China: Fujian	pig
Acinetobacter_sp._YH12206	Acinetobacter_sichuanensis_WCHAc060041	85.1607	Acinetobacter_sp	GCA_013418115.1	https://ftp.ncbi.nlm.nih.gov/genomes/all/GCA/013/418/115/GCA_013418115.1_ASM1341811v1	feces	China: Zhejiang	pig
Acinetobacter_sp._YH12076	Acinetobacter_gandensis_CCUG_68482	85.1615	Acinetobacter_sp	GCA_013419525.1	https://ftp.ncbi.nlm.nih.gov/genomes/all/GCA/013/419/525/GCA_013419525.1_ASM1341952v1	feces	China: Jiangxi	pig
Acinetobacter_piscicola_YH12207_T	Acinetobacter_sichuanensis_WCHAc060041	85.1641	Acinetobacter_sp	GCA_015218165.1	https://ftp.ncbi.nlm.nih.gov/genomes/all/GCA/015/218/165/GCA_015218165.1_ASM1521816v1	feces	China: Zhejiang	Pig
Acinetobacter_sp._YH12029	Acinetobacter_gandensis_CCUG_68482	85.1646	Acinetobacter_sp	GCA_013420095.1	https://ftp.ncbi.nlm.nih.gov/genomes/all/GCA/013/420/095/GCA_013420095.1_ASM1342009v1	feces	China: Fujian	pig
Acinetobacter_sp._YH12098	Acinetobacter_gandensis_CCUG_68482	85.1742	Acinetobacter_sp	GCA_013419235.1	https://ftp.ncbi.nlm.nih.gov/genomes/all/GCA/013/419/235/GCA_013419235.1_ASM1341923v1	feces	China: Guangdong	pig
Acinetobacter_sp._YH12023	Acinetobacter_gandensis_CCUG_68482	85.1888	Acinetobacter_sp	GCA_013420135.1	https://ftp.ncbi.nlm.nih.gov/genomes/all/GCA/013/420/135/GCA_013420135.1_ASM1342013v1	feces	China: Fujian	pig
Acinetobacter_sp._YH12079	Acinetobacter_gandensis_CCUG_68482	85.19	Acinetobacter_sp	GCA_013419515.1	https://ftp.ncbi.nlm.nih.gov/genomes/all/GCA/013/419/515/GCA_013419515.1_ASM1341951v1	feces	China: Jiangxi	pig
Acinetobacter_piscicola_C1T1-2_a	Acinetobacter_sichuanensis_WCHAc060041	85.3255	Acinetobacter_sp	GCA_004152775.1	https://ftp.ncbi.nlm.nih.gov/genomes/all/GCA/004/152/775/GCA_004152775.1_ASM415277v1	manure	Canada: Sherbrooke	Bos taurus
Acinetobacter_boissieri_ANC_4422	Acinetobacter_rathckeae_EC24	85.386	Acinetobacter_sp	GCA_900096955.1	https://ftp.ncbi.nlm.nih.gov/genomes/all/GCA/900/096/955/GCA_900096955.1_IMG-taxon_2671180229_annotated_assembly	blank	blank	blank
Acinetobacter_sp._S40	Acinetobacter_guerrae_AC_1271	85.4003	Acinetobacter_sp	GCA_016624705.1	https://ftp.ncbi.nlm.nih.gov/genomes/all/GCA/016/624/705/GCA_016624705.1_S40	Eggs	Mexico	Hypothenemus hampei
Acinetobacter_sp._S54	Acinetobacter_guerrae_AC_1271	85.4015	Acinetobacter_sp	GCA_016624945.1	https://ftp.ncbi.nlm.nih.gov/genomes/all/GCA/016/624/945/GCA_016624945.1_S54	Eggs	USA: Hawaii	Hypothenemus hampei
Acinetobacter_sp._S55	Acinetobacter_guerrae_AC_1271	85.4462	Acinetobacter_sp	GCA_016624985.1	https://ftp.ncbi.nlm.nih.gov/genomes/all/GCA/016/624/985/GCA_016624985.1_S55	Eggs	USA: Hawaii	Hypothenemus hampei
Acinetobacter_sp._Marseille-Q1623	Acinetobacter_sichuanensis_WCHAc060041	85.7716	Acinetobacter_sp	GCA_902809895.1	https://ftp.ncbi.nlm.nih.gov/genomes/all/GCA/902/809/895/GCA_902809895.1_Q1623	Chimpanze feces	blank	blank
Acinetobacter_sp._ANC_3929	Acinetobacter_proteolyticus_NIPH_809	86.591	Acinetobacter_sp	GCA_000369405.1	https://ftp.ncbi.nlm.nih.gov/genomes/all/GCA/000/369/405/GCA_000369405.1_Acin_sp_ANC_3929_V1	blank	blank	blank
Acinetobacter_sp._NIPH_2100	Acinetobacter_gyllenbergii_CIP_110306	86.8064	Acinetobacter_sp	GCA_000369805.1	https://ftp.ncbi.nlm.nih.gov/genomes/all/GCA/000/369/805/GCA_000369805.1_Acin_sp_NIPH_2100_V1	blank	blank	blank
Acinetobacter_sp._YIM_103518	Acinetobacter_portensis_AC_877	87.3114	Acinetobacter_sp	GCA_009707625.1	https://ftp.ncbi.nlm.nih.gov/genomes/all/GCA/009/707/625/GCA_009707625.1_ASM970762v1	feces	China	blank
Acinetobacter_sp._A47	Acinetobacter_courvalinii_CCUG_67960	87.7612	Acinetobacter_sp	GCA_000805455.1	https://ftp.ncbi.nlm.nih.gov/genomes/all/GCA/000/805/455/GCA_000805455.1_ASM80545v1	soft tissue samples	Argentina: Buenos Aires	Homo sapiens
Acinetobacter_sp._LoGeW2-3	Acinetobacter_schindleri_CIP_107287	87.9569	Acinetobacter_sp	GCA_002688565.1	https://ftp.ncbi.nlm.nih.gov/genomes/all/GCA/002/688/565/GCA_002688565.1_ASM268856v1	pellet	Germany: Loburg	white stork
Acinetobacter_sp._P8-3-8	Acinetobacter_piscicola_LW15	88.4086	Acinetobacter_sp	GCA_000214135.2	https://ftp.ncbi.nlm.nih.gov/genomes/all/GCA/000/214/135/GCA_000214135.2_ASM21413v1	blank	blank	blank
Acinetobacter_towneri_AT1	Acinetobacter_seohaensis_DSM_16313	88.6405	Acinetobacter_sp	GCA_012371355.1	https://ftp.ncbi.nlm.nih.gov/genomes/all/GCA/012/371/355/GCA_012371355.1_ASM1237135v1	cow	China	blank
Acinetobacter_sp._A2	Acinetobacter_seohaensis_DSM_16313	88.6736	Acinetobacter_sp	GCA_012371325.1	https://ftp.ncbi.nlm.nih.gov/genomes/all/GCA/012/371/325/GCA_012371325.1_ASM1237132v1	cow	China	blank
Acinetobacter_sp._A1	Acinetobacter_seohaensis_DSM_16313	88.7483	Acinetobacter_sp	GCA_012371315.1	https://ftp.ncbi.nlm.nih.gov/genomes/all/GCA/012/371/315/GCA_012371315.1_ASM1237131v1	cow	China	blank
Acinetobacter_sp._A3	Acinetobacter_seohaensis_DSM_16313	88.7662	Acinetobacter_sp	GCA_012371415.1	https://ftp.ncbi.nlm.nih.gov/genomes/all/GCA/012/371/415/GCA_012371415.1_ASM1237141v1	cow	China	blank
Acinetobacter_sp._NIPH_1867	Acinetobacter_proteolyticus_NIPH_809	88.8315	Acinetobacter_sp	GCA_000369545.1	https://ftp.ncbi.nlm.nih.gov/genomes/all/GCA/000/369/545/GCA_000369545.1_Acin_sp_NIPH_1867_V1	blank	blank	blank
Acinetobacter_sp._ANC_4105	Acinetobacter_proteolyticus_NIPH_809	88.8407	Acinetobacter_sp	GCA_000369485.1	https://ftp.ncbi.nlm.nih.gov/genomes/all/GCA/000/369/485/GCA_000369485.1_Acin_sp_ANC_4105_V1	blank	blank	blank
Acinetobacter_sp._ANC_3781	Acinetobacter_terrae_ANC_4282	88.9006	Acinetobacter_sp	GCA_004331285.1	https://ftp.ncbi.nlm.nih.gov/genomes/all/GCA/004/331/285/GCA_004331285.1_ASM433128v1	soil of beech forest	Czech Republic: Chudenice	blank
Acinetobacter_sp._BY484	Acinetobacter_lwoffii_CIP_64.10	89.0023	Acinetobacter_sp	GCA_019038255.1	https://ftp.ncbi.nlm.nih.gov/genomes/all/GCA/019/038/255/GCA_019038255.1_ASM1903825v1	blank	China: Yushu Tibetan Autonomous Prefecture, Qinghai Province	blank
Acinetobacter_dispersus_NCCP_16014	Acinetobacter_proteolyticus_NIPH_809	89.0055	Acinetobacter_sp	GCA_009884975.1	https://ftp.ncbi.nlm.nih.gov/genomes/all/GCA/009/884/975/GCA_009884975.1_ASM988497v1	sputum	South Korea: Incheon	Homo sapiens
Acinetobacter_sp._SWAC57	Acinetobacter_johnsonii_DSM_6963	89.1131	Acinetobacter_sp	GCA_003569905.1	https://ftp.ncbi.nlm.nih.gov/genomes/all/GCA/003/569/905/GCA_003569905.1_ASM356990v1	hospital sewage	China	blank
Acinetobacter_sp._BY419	Acinetobacter_lwoffii_CIP_64.10	89.1296	Acinetobacter_sp	GCA_019038395.1	https://ftp.ncbi.nlm.nih.gov/genomes/all/GCA/019/038/395/GCA_019038395.1_ASM1903839v1	blank	China: Yushu Tibetan Autonomous Prefecture, Qinghai Province	blank
Acinetobacter_sp._TUM15071	Acinetobacter_proteolyticus_NIPH_809	89.1806	Acinetobacter_sp	GCA_008980925.1	https://ftp.ncbi.nlm.nih.gov/genomes/all/GCA/008/980/925/GCA_008980925.1_ASM898092v1	human sputum	Japan:Tokyo	Homo sapiens
Acinetobacter_sp._SFB	Acinetobacter_terrestris_ANC_4471	89.1823	Acinetobacter_sp	GCA_001647545.1	https://ftp.ncbi.nlm.nih.gov/genomes/all/GCA/001/647/545/GCA_001647545.1_ASM164754v1	blank	United Kingdom	Sheep
Acinetobacter_sp._Tr-809	Acinetobacter_proteolyticus_NIPH_809	89.1851	Acinetobacter_sp	GCA_011753255.1	https://ftp.ncbi.nlm.nih.gov/genomes/all/GCA/011/753/255/GCA_011753255.1_ASM1175325v1	Trachymyrmex fungus garden	Brazil: Sao Paulo State	blank
Acinetobacter_sp._ANC_4204	Acinetobacter_johnsonii_DSM_6963	89.2392	Acinetobacter_sp	GCA_002135205.1	https://ftp.ncbi.nlm.nih.gov/genomes/all/GCA/002/135/205/GCA_002135205.1_ASM213520v1	wetland water with mud	Czech Republic: Kreckov	blank
Acinetobacter_sp._ANC_4779	Acinetobacter_terrestris_ANC_4471	89.2997	Acinetobacter_sp	GCA_004331055.1	https://ftp.ncbi.nlm.nih.gov/genomes/all/GCA/004/331/055/GCA_004331055.1_ASM433105v1	mud of a forest creek bank	Czech Republic: Krivoklatsko forestland	blank
Acinetobacter_sp._TUM15064	Acinetobacter_johnsonii_CIP_64.6	89.3397	Acinetobacter_sp	GCA_008980265.1	https://ftp.ncbi.nlm.nih.gov/genomes/all/GCA/008/980/265/GCA_008980265.1_ASM898026v1	human sputum	Japan:Tokyo	Homo sapiens
Acinetobacter_sp._WCHAc060042	Acinetobacter_johnsonii_CIP_64.6	89.3516	Acinetobacter_sp	GCA_003231195.1	https://ftp.ncbi.nlm.nih.gov/genomes/all/GCA/003/231/195/GCA_003231195.1_ASM323119v1	Sewage	China: Chengdu, Sichuan	blank
Acinetobacter_towneri_ZZC3-9	Acinetobacter_seohaensis_DSM_16313	89.5569	Acinetobacter_sp	GCA_015351655.1	https://ftp.ncbi.nlm.nih.gov/genomes/all/GCA/015/351/655/GCA_015351655.1_ASM1535165v1	blank	China: Sichuan	beef cattle
Acinetobacter_baumannii_ACIN00150	Acinetobacter_bereziniae_LMG_1003	89.6361	Acinetobacter_sp	GCA_016508585.1	https://ftp.ncbi.nlm.nih.gov/genomes/all/GCA/016/508/585/GCA_016508585.1_ASM1650858v1	sputum	USA: Pittsburgh, Pennsylvania	Homo sapiens
Acinetobacter_sp._Res13-Abat-PEC04-P4b-01	Acinetobacter_bereziniae_LMG_1003	89.778	Acinetobacter_sp	GCA_015676515.1	https://ftp.ncbi.nlm.nih.gov/genomes/all/GCA/015/676/515/GCA_015676515.1_ASM1567651v1	swab	Canada: Quebec	Sus scrofa domesticus
Acinetobacter_sp._Res13-Abat-PEC02-P3-01	Acinetobacter_bereziniae_LMG_1003	89.7906	Acinetobacter_sp	GCA_015676525.1	https://ftp.ncbi.nlm.nih.gov/genomes/all/GCA/015/676/525/GCA_015676525.1_ASM1567652v1	swab	Canada: Quebec	Sus scrofa domesticus
Acinetobacter_sp._Res13-Abat-PEC08-P2-01	Acinetobacter_bereziniae_LMG_1003	89.792	Acinetobacter_sp	GCA_015676495.1	https://ftp.ncbi.nlm.nih.gov/genomes/all/GCA/015/676/495/GCA_015676495.1_ASM1567649v1	swab	Canada: Quebec	Sus scrofa domesticus
Acinetobacter_sp._Res13-Abat-PEC14-P4-01	Acinetobacter_bereziniae_LMG_1003	89.7932	Acinetobacter_sp	GCA_015676325.1	https://ftp.ncbi.nlm.nih.gov/genomes/all/GCA/015/676/325/GCA_015676325.1_ASM1567632v1	swab	Canada: Quebec	Sus scrofa domesticus
Acinetobacter_sp._Res13-Abat-PEC07-P2-02	Acinetobacter_bereziniae_LMG_1003	89.8097	Acinetobacter_sp	GCA_015676505.1	https://ftp.ncbi.nlm.nih.gov/genomes/all/GCA/015/676/505/GCA_015676505.1_ASM1567650v1	swab	Canada: Quebec	Sus scrofa domesticus
Acinetobacter_sp._Res13-Abat-PEC10-P4-01	Acinetobacter_bereziniae_LMG_1003	89.8146	Acinetobacter_sp	GCA_015676445.1	https://ftp.ncbi.nlm.nih.gov/genomes/all/GCA/015/676/445/GCA_015676445.1_ASM1567644v1	swab	Canada: Quebec	Sus scrofa domesticus
Acinetobacter_sp._Res13-Abat-PEC12-P3-01	Acinetobacter_bereziniae_LMG_1003	89.8371	Acinetobacter_sp	GCA_015676425.1	https://ftp.ncbi.nlm.nih.gov/genomes/all/GCA/015/676/425/GCA_015676425.1_ASM1567642v1	swab	Canada: Quebec	Sus scrofa domesticus
Acinetobacter_sp._Res13-Abat-PEC15-P4-01	Acinetobacter_bereziniae_LMG_1003	89.8386	Acinetobacter_sp	GCA_015676285.1	https://ftp.ncbi.nlm.nih.gov/genomes/all/GCA/015/676/285/GCA_015676285.1_ASM1567628v1	swab	Canada: Quebec	Sus scrofa domesticus
Acinetobacter_lwoffii_DE0136	Acinetobacter_lwoffii_CIP_64.10	90.22	Acinetobacter_sp	GCA_007678965.1	https://ftp.ncbi.nlm.nih.gov/genomes/all/GCA/007/678/965/GCA_007678965.1_ASM767896v1	environmental	USA: North Carolina, Durham	blank
Acinetobacter_sp._SFD	Acinetobacter_lwoffii_CIP_64.10	90.2392	Acinetobacter_sp	GCA_001647575.1	https://ftp.ncbi.nlm.nih.gov/genomes/all/GCA/001/647/575/GCA_001647575.1_ASM164757v1	blank	United Kingdom	Sheep
Acinetobacter_sp._SFA	Acinetobacter_lwoffii_CIP_64.10	90.247	Acinetobacter_sp	GCA_001647535.1	https://ftp.ncbi.nlm.nih.gov/genomes/all/GCA/001/647/535/GCA_001647535.1_ASM164753v1	blank	United Kingdom	Sheep
Acinetobacter_sp._Sa1BUA6	Acinetobacter_lwoffii_CIP_64.10	90.3402	Acinetobacter_sp	GCA_014837015.1	https://ftp.ncbi.nlm.nih.gov/genomes/all/GCA/014/837/015/GCA_014837015.1_ASM1483701v1	blank	United Kingdom: Norwich	Gallus gallus
Acinetobacter_sp._ANC_4173	Acinetobacter_tandoii_DSM_14970	90.754	Acinetobacter_sp	GCA_004331255.1	https://ftp.ncbi.nlm.nih.gov/genomes/all/GCA/004/331/255/GCA_004331255.1_ASM433125v1	mud of a creek bank	Czech Republic: Petrovice	blank
Acinetobacter_sp._ANC_4910	Acinetobacter_tandoii_DSM_14970	90.8084	Acinetobacter_sp	GCA_004331035.1	https://ftp.ncbi.nlm.nih.gov/genomes/all/GCA/004/331/035/GCA_004331035.1_ASM433103v1	Water with organic detritus of a blind river branch	Czech Republic: Belec nad Orlici	blank
Acinetobacter_sp._Marseille-Q1618	Acinetobacter_defluvii_WCHA30	90.9566	Acinetobacter_sp	GCA_902809855.1	https://ftp.ncbi.nlm.nih.gov/genomes/all/GCA/902/809/855/GCA_902809855.1_Q1618	Chimpanze feces	blank	blank
Acinetobacter_sp._ANC_4178	Acinetobacter_tandoii_DSM_14970	91.0674	Acinetobacter_sp	GCA_004331175.1	https://ftp.ncbi.nlm.nih.gov/genomes/all/GCA/004/331/175/GCA_004331175.1_ASM433117v1	mud of a pond bottom	Czech Republic: Ortvinovice	blank
Acinetobacter_sp._CIP_110321	Acinetobacter_proteolyticus_NIPH_809	91.1668	Acinetobacter_sp	GCA_000400715.1	https://ftp.ncbi.nlm.nih.gov/genomes/all/GCA/000/400/715/GCA_000400715.1_Acin_sp_CIP_110321_V1	skin	Hungary	Homo sapiens
Acinetobacter_sp._ANC_4470	Acinetobacter_bohemicus_ANC_3994	91.2433	Acinetobacter_sp	GCA_002135335.1	https://ftp.ncbi.nlm.nih.gov/genomes/all/GCA/002/135/335/GCA_002135335.1_ASM213533v1	cave soil	Czech Republic: Moravsky Kras	blank
Acinetobacter_calcoaceticus_ACIN00260	Acinetobacter_calcoaceticus_CIP_81.8	91.2596	Acinetobacter_sp	GCA_016508255.1	https://ftp.ncbi.nlm.nih.gov/genomes/all/GCA/016/508/255/GCA_016508255.1_ASM1650825v1	sputum	USA: Pittsburgh, Pennsylvania	Homo sapiens
Acinetobacter_sp._TG19627	Acinetobacter_proteolyticus_NIPH_809	91.3098	Acinetobacter_sp	GCA_000302415.1	https://ftp.ncbi.nlm.nih.gov/genomes/all/GCA/000/302/415/GCA_000302415.1_ASM30241v1	urine	blank	Homo sapiens
Acinetobacter_sp._Marseille-P8610	Acinetobacter_proteolyticus_NIPH_809	91.3362	Acinetobacter_sp	GCA_912073635.1	https://ftp.ncbi.nlm.nih.gov/genomes/all/GCA/912/073/635/GCA_912073635.1_PRJEB46688	blood	blank	blank
Acinetobacter_sp._CIP_70.18	Acinetobacter_proteolyticus_NIPH_809	91.3555	Acinetobacter_sp	GCA_000369525.1	https://ftp.ncbi.nlm.nih.gov/genomes/all/GCA/000/369/525/GCA_000369525.1_Acin_sp_CIP_70_18_V1	blank	blank	blank
Acinetobacter_sp._CIP_56.2	Acinetobacter_proteolyticus_NIPH_809	91.3949	Acinetobacter_sp	GCA_000368445.1	https://ftp.ncbi.nlm.nih.gov/genomes/all/GCA/000/368/445/GCA_000368445.1_Acin_sp_CIP_56_2_V1	blank	blank	blank
Acinetobacter_sp._ANC_3880	Acinetobacter_proteolyticus_NIPH_809	91.4136	Acinetobacter_sp	GCA_000369845.1	https://ftp.ncbi.nlm.nih.gov/genomes/all/GCA/000/369/845/GCA_000369845.1_Acin_sp_ANC_3880_V1	blank	blank	blank
Acinetobacter_sp._MN12	Acinetobacter_proteolyticus_NIPH_809	91.4961	Acinetobacter_sp	GCA_000764915.1	https://ftp.ncbi.nlm.nih.gov/genomes/all/GCA/000/764/915/GCA_000764915.1_Acinetobater_Genome_Assembly	soil sample of Mane area of cold desert	India: Lahaul and Spiti district of Himachal Pradesh	blank
Acinetobacter_sp._UBA991	Acinetobacter_proteolyticus_NIPH_809	91.5257	Acinetobacter_sp	GCA_002292065.1	https://ftp.ncbi.nlm.nih.gov/genomes/all/GCA/002/292/065/GCA_002292065.1_ASM229206v1	metal/plastic	USA:New York City	blank
Acinetobacter_puyangensis_ANC_4466	Acinetobacter_populi_PBJ7	91.6104	Acinetobacter_sp	GCA_900096995.1	https://ftp.ncbi.nlm.nih.gov/genomes/all/GCA/900/096/995/GCA_900096995.1_IMG-taxon_2671180233_annotated_assembly	blank	blank	blank
Acinetobacter_sp._Ac_3412	Acinetobacter_proteolyticus_NIPH_809	91.6687	Acinetobacter_sp	GCA_013072675.1	https://ftp.ncbi.nlm.nih.gov/genomes/all/GCA/013/072/675/GCA_013072675.1_ASM1307267v1	Lettuce	Portugal: Porto	blank
Acinetobacter_sp._AM	Acinetobacter_tandoii_DSM_14970	91.789	Acinetobacter_sp	GCA_003105055.1	https://ftp.ncbi.nlm.nih.gov/genomes/all/GCA/003/105/055/GCA_003105055.1_ASM310505v1	Freshwater creek	USA: Pennsylvania	blank
Acinetobacter_sp._Ac_5812	Acinetobacter_gyllenbergii_CIP_110306	91.8319	Acinetobacter_sp	GCA_013072695.1	https://ftp.ncbi.nlm.nih.gov/genomes/all/GCA/013/072/695/GCA_013072695.1_ASM1307269v1	Lettuce	Portugal: Porto	blank
Acinetobacter_haemolyticus_KCRI-348C	Acinetobacter_haemolyticus_MTCC_9819	92.5351	Acinetobacter_sp	GCA_900406815.1	https://ftp.ncbi.nlm.nih.gov/genomes/all/GCA/900/406/815/GCA_900406815.1_De_novo_assembly_of_KCRI_isolate_R0006_348C	wound swab sample	blank	blank
Acinetobacter_sp._ANC_4862	Acinetobacter_terrae_ANC_4282	92.6273	Acinetobacter_sp	GCA_004336635.1	https://ftp.ncbi.nlm.nih.gov/genomes/all/GCA/004/336/635/GCA_004336635.1_ASM433663v1	water with organic detritus of a forest pool	Czech Republic: Snepov	blank
Acinetobacter_sp._ANC_5378	Acinetobacter_terrae_ANC_4282	92.6379	Acinetobacter_sp	GCA_013004315.1	https://ftp.ncbi.nlm.nih.gov/genomes/all/GCA/013/004/315/GCA_013004315.1_ASM1300431v1	Mud of a seasonal forest creek	Czech Republic: Dobris	blank
Acinetobacter_sp._ANC_5414	Acinetobacter_terrae_ANC_4282	92.7007	Acinetobacter_sp	GCA_013004295.1	https://ftp.ncbi.nlm.nih.gov/genomes/all/GCA/013/004/295/GCA_013004295.1_ASM1300429v1	Soil of a forest pool bank	Czech Republic: Dobris	blank
Acinetobacter_sp._WCHA55	Acinetobacter_johnsonii_CIP_64.6	92.7926	Acinetobacter_sp	GCA_002165305.2	https://ftp.ncbi.nlm.nih.gov/genomes/all/GCA/002/165/305/GCA_002165305.2_ASM216530v2	Sewage	China: Sichuan, Chengdu	blank
Acinetobacter_kyonggiensis_ANC_5109	Acinetobacter_bohemicus_ANC_3994	92.9457	Acinetobacter_sp	GCA_900107285.1	https://ftp.ncbi.nlm.nih.gov/genomes/all/GCA/900/107/285/GCA_900107285.1_IMG-taxon_2675903034_annotated_assembly	blank	blank	blank
Acinetobacter_sp._WC-141	Acinetobacter_oleivorans_DR1	92.9671	Acinetobacter_sp	GCA_000313935.1	https://ftp.ncbi.nlm.nih.gov/genomes/all/GCA/000/313/935/GCA_000313935.1_gacin27v1.0	health care equipment surface	Iraq: Camp Delta	blank
Acinetobacter_sp._ANC_4641	Acinetobacter_brisouii_CIP_110357	92.982	Acinetobacter_sp	GCA_004331065.1	https://ftp.ncbi.nlm.nih.gov/genomes/all/GCA/004/331/065/GCA_004331065.1_ASM433106v1	Mud with water, below a pond dam	Czech Republic: Ortvinovice	blank
Acinetobacter_sp._105-3	Acinetobacter_oleivorans_DR1	93.1677	Acinetobacter_sp	GCA_016906005.1	https://ftp.ncbi.nlm.nih.gov/genomes/all/GCA/016/906/005/GCA_016906005.1_ASM1690600v1	water	Svalbard	blank
Acinetobacter_sp._ANC_4973	Acinetobacter_bohemicus_ANC_3994	93.1948	Acinetobacter_sp	GCA_002135275.1	https://ftp.ncbi.nlm.nih.gov/genomes/all/GCA/002/135/275/GCA_002135275.1_ASM213527v1	mud of a creek bank	Czech Republic: Chriby mountains	blank
Acinetobacter_sp._NIPH_298	Acinetobacter_halotolerans_JCM_31009	93.2158	Acinetobacter_sp	GCA_000369505.1	https://ftp.ncbi.nlm.nih.gov/genomes/all/GCA/000/369/505/GCA_000369505.1_Acin_sp_NIPH_298_V1	blank	blank	blank
Acinetobacter_sp._CIP-A165_CIP_A165	Acinetobacter_halotolerans_JCM_31009	93.2862	Acinetobacter_sp	GCA_000367985.1	https://ftp.ncbi.nlm.nih.gov/genomes/all/GCA/000/367/985/GCA_000367985.1_Acin_sp_CIP_A165_V1	blank	blank	blank
Acinetobacter_sp._UBA801	Acinetobacter_towneri_DSM_14962	93.335	Acinetobacter_sp	GCA_002296655.1	https://ftp.ncbi.nlm.nih.gov/genomes/all/GCA/002/296/655/GCA_002296655.1_ASM229665v1	clay	Canada: Alberta	blank
Acinetobacter_sp._ANC_4633	Acinetobacter_brisouii_CIP_110357	93.4843	Acinetobacter_sp	GCA_004331075.1	https://ftp.ncbi.nlm.nih.gov/genomes/all/GCA/004/331/075/GCA_004331075.1_ASM433107v1	mud of a pond bottom	Czech Republic: Ortvinovice	blank
Acinetobacter_calcoaceticus_Aci00895	Acinetobacter_calcoaceticus_CIP_81.8	93.5342	Acinetobacter_sp	GCA_904887615.1	https://ftp.ncbi.nlm.nih.gov/genomes/all/GCA/904/887/615/GCA_904887615.1_Aci00895-181025_contigs_filtered.fa.gz	clinical material	blank	blank
Acinetobacter_sp._C16S1	Acinetobacter_haemolyticus_MTCC_9819	93.5804	Acinetobacter_sp	GCA_008630915.1	https://ftp.ncbi.nlm.nih.gov/genomes/all/GCA/008/630/915/GCA_008630915.1_ASM863091v1	saline soil	China: Inner Mongolia	blank
Acinetobacter_oleivorans_PF1	Acinetobacter_calcoaceticus_CIP_81.8	93.6003	Acinetobacter_sp	GCA_000803285.1	https://ftp.ncbi.nlm.nih.gov/genomes/all/GCA/000/803/285/GCA_000803285.1_AciOleGF1_1.0	Soil	Belgium	blank
Acinetobacter_calcoaceticus_GK2	Acinetobacter_calcoaceticus_CIP_81.8	93.6666	Acinetobacter_sp	GCA_001510805.1	https://ftp.ncbi.nlm.nih.gov/genomes/all/GCA/001/510/805/GCA_001510805.1_ASM151080v1	rhizosphere	Belgium: Genk	blank
Acinetobacter_sp._MDS7A	Acinetobacter_seohaensis_DSM_16313	93.6688	Acinetobacter_sp	GCA_000386005.1	https://ftp.ncbi.nlm.nih.gov/genomes/all/GCA/000/386/005/GCA_000386005.1_Ac7Aver1	dairy sludge	India	blank
Acinetobacter_sp._ANC_4654	Acinetobacter_bohemicus_ANC_3994	93.7355	Acinetobacter_sp	GCA_002135425.1	https://ftp.ncbi.nlm.nih.gov/genomes/all/GCA/002/135/425/GCA_002135425.1_ASM213542v1	mud from a seasonal creek	Czech Republic: Krivoklatsko forestland	blank
Acinetobacter_towneri_5-2Ac02	Acinetobacter_towneri_DSM_14962	93.7736	Acinetobacter_sp	GCA_001758345.1	https://ftp.ncbi.nlm.nih.gov/genomes/all/GCA/001/758/345/GCA_001758345.1_ASM175834v1	Air sample from hospital environment	Brazil: Rio de Janeiro	blank
Acinetobacter_calcoaceticus_Acinetobacter_calcoaceticus_str._2117	Acinetobacter_calcoaceticus_DSM_30006	93.8062	Acinetobacter_sp	GCA_900520355.1	https://ftp.ncbi.nlm.nih.gov/genomes/all/GCA/900/520/355/GCA_900520355.1_ASM90052035v1	blank	blank	blank
Acinetobacter_sp._ANC_3791	Acinetobacter_brisouii_CIP_110357	93.8545	Acinetobacter_sp	GCA_004331275.1	https://ftp.ncbi.nlm.nih.gov/genomes/all/GCA/004/331/275/GCA_004331275.1_ASM433127v1	pond water	Czech Republic: Velechvin	blank
Acinetobacter_sp._ANC_3789	Acinetobacter_brisouii_CIP_110357	93.8933	Acinetobacter_sp	GCA_000368265.1	https://ftp.ncbi.nlm.nih.gov/genomes/all/GCA/000/368/265/GCA_000368265.1_Acin_sp_ANC_3789_V1	blank	blank	blank
Acinetobacter_pittii_ANC_4050	Acinetobacter_lactucae_NRRL_B-41902	93.966	Acinetobacter_sp	GCA_000399685.1	https://ftp.ncbi.nlm.nih.gov/genomes/all/GCA/000/399/685/GCA_000399685.1_Acin_pitt_ANC_4050_V1	blank	blank	blank
Acinetobacter_pittii_HW4Z	Acinetobacter_lactucae_NRRL_B-41902	94.0219	Acinetobacter_sp	GCA_020179055.1	https://ftp.ncbi.nlm.nih.gov/genomes/all/GCA/020/179/055/GCA_020179055.1_ASM2017905v1	rhizosphere	Australia: Sydney	wheat
Acinetobacter_sp._ANC_4635	Acinetobacter_brisouii_CIP_110357	94.0404	Acinetobacter_sp	GCA_004331085.1	https://ftp.ncbi.nlm.nih.gov/genomes/all/GCA/004/331/085/GCA_004331085.1_ASM433108v1	Mud with water, below a pond dam	Czech Republic: Ortvinovice	blank
Acinetobacter_calcoaceticus_ANC_3811	Acinetobacter_oleivorans_KCTC_23045	94.2954	Acinetobacter_sp	GCA_000399665.1	https://ftp.ncbi.nlm.nih.gov/genomes/all/GCA/000/399/665/GCA_000399665.1_Acin_calc_ANC_3811_V1	blank	blank	blank
Acinetobacter_sp._NIPH_284	Acinetobacter_modestus_CCM_8639	94.3446	Acinetobacter_sp	GCA_000369425.1	https://ftp.ncbi.nlm.nih.gov/genomes/all/GCA/000/369/425/GCA_000369425.1_Acin_sp_NIPH_284_V1	blank	blank	blank
Acinetobacter_baumannii_573719	Acinetobacter_pittii_ATCC_19004	94.3821	Acinetobacter_sp	GCA_000588275.1	https://ftp.ncbi.nlm.nih.gov/genomes/all/GCA/000/588/275/GCA_000588275.1_ASM58827v1	sputum	USA	Homo sapiens
Acinetobacter_pittii_AC15156	Acinetobacter_pittii_ATCC_19004	94.3846	Acinetobacter_sp	GCA_017161935.1	https://ftp.ncbi.nlm.nih.gov/genomes/all/GCA/017/161/935/GCA_017161935.1_ASM1716193v1	eye swab	Malaysia	Homo sapiens
Acinetobacter_sp._SwsAc4	Acinetobacter_modestus_CCM_8639	94.4275	Acinetobacter_sp	GCA_013391535.1	https://ftp.ncbi.nlm.nih.gov/genomes/all/GCA/013/391/535/GCA_013391535.1_ASM1339153v1	hospital sewage	China: Southwest	blank
Acinetobacter_pittii_ACIN00201	Acinetobacter_pittii_DSM_25618	94.4325	Acinetobacter_sp	GCA_016502605.1	https://ftp.ncbi.nlm.nih.gov/genomes/all/GCA/016/502/605/GCA_016502605.1_ASM1650260v1	sputum	USA: Pittsburgh, Pennsylvania	Homo sapiens
Acinetobacter_pittii_ACIN00162	Acinetobacter_pittii_DSM_25618	94.4964	Acinetobacter_sp	GCA_016503025.1	https://ftp.ncbi.nlm.nih.gov/genomes/all/GCA/016/503/025/GCA_016503025.1_ASM1650302v1	Tissue	USA: Pittsburgh, Pennsylvania	Homo sapiens
Acinetobacter_sp._WCHA29	Acinetobacter_modestus_CCM_8639	94.5005	Acinetobacter modestus	GCA_002165335.1	https://ftp.ncbi.nlm.nih.gov/genomes/all/GCA/002/165/335/GCA_002165335.1_ASM216533v1	Sewage	China: Sichuan, Chengdu	blank
Acinetobacter_pittii_MCR8900	Acinetobacter_pittii_ATCC_19004	94.5085	Acinetobacter pittii	GCA_002928115.1	https://ftp.ncbi.nlm.nih.gov/genomes/all/GCA/002/928/115/GCA_002928115.1_ASM292811v1	Endobronchial tube	Honduras: Cortes, San Pedro Sula	Homo sapiens
Acinetobacter_sp._WCHA39	Acinetobacter_modestus_CCM_8639	94.5311	Acinetobacter modestus	GCA_002165385.1	https://ftp.ncbi.nlm.nih.gov/genomes/all/GCA/002/165/385/GCA_002165385.1_ASM216538v1	Sewage	China: Sichuan, Chengdu	blank
Acinetobacter_baumannii_WPB103	Acinetobacter_modestus_CCM_8639	94.5513	Acinetobacter modestus	GCA_003945465.1	https://ftp.ncbi.nlm.nih.gov/genomes/all/GCA/003/945/465/GCA_003945465.1_ASM394546v1	hospital wastewaters	Singapore	blank
Acinetobacter_pittii_ACIN00165	Acinetobacter_pittii_ATCC_19004	94.5548	Acinetobacter pittii	GCA_016508495.1	https://ftp.ncbi.nlm.nih.gov/genomes/all/GCA/016/508/495/GCA_016508495.1_ASM1650849v1	tissue	USA: Pittsburgh, Pennsylvania	Homo sapiens
Acinetobacter_sp._WCHA45	Acinetobacter_modestus_CCM_8639	94.639	Acinetobacter modestus	GCA_002165255.2	https://ftp.ncbi.nlm.nih.gov/genomes/all/GCA/002/165/255/GCA_002165255.2_ASM216525v2	Sewage	China: Sichuan, Chengdu	blank
Acinetobacter_pittii_ABBL016	Acinetobacter_pittii_DSM_25618	94.6619	Acinetobacter pittii	GCA_001432505.1	https://ftp.ncbi.nlm.nih.gov/genomes/all/GCA/001/432/505/GCA_001432505.1_ASM143250v1	Blood	USA: Chicago	Homo sapiens
Acinetobacter_baumannii_NCTC_7422	Acinetobacter_colistiniresistens_NIPH_2036	94.7713	Acinetobacter colistiniresistens	GCA_000248195.2	https://ftp.ncbi.nlm.nih.gov/genomes/all/GCA/000/248/195/GCA_000248195.2_ASM24819v2	leg burn	United Kingdom: Manchester	Homo sapiens
Acinetobacter_sp._TUM15521	Acinetobacter_colistiniresistens_NIPH_2036	94.7747	Acinetobacter colistiniresistens	GCA_009013295.1	https://ftp.ncbi.nlm.nih.gov/genomes/all/GCA/009/013/295/GCA_009013295.1_ASM901329v1	human blood	Japan:Kanagawa	Homo sapiens
Acinetobacter_sp._CIP_64.2	Acinetobacter_colistiniresistens_NIPH_2036	94.8	Acinetobacter colistiniresistens	GCA_000369645.1	https://ftp.ncbi.nlm.nih.gov/genomes/all/GCA/000/369/645/GCA_000369645.1_Acin_sp_CIP_64_2_V1	blank	blank	blank
Acinetobacter_sp._NBRC_110496	Acinetobacter_colistiniresistens_NIPH_2036	94.8569	Acinetobacter colistiniresistens	GCA_000876115.1	https://ftp.ncbi.nlm.nih.gov/genomes/all/GCA/000/876/115/GCA_000876115.1_ASM87611v1	blank	blank	blank
Acinetobacter_colistiniresistens_NR1165	Acinetobacter_colistiniresistens_NIPH_2036	94.9455	Acinetobacter colistiniresistens	GCA_003227755.1	https://ftp.ncbi.nlm.nih.gov/genomes/all/GCA/003/227/755/GCA_003227755.1_ASM322775v1	blank	blank	blank
Acinetobacter_sp._YH16031	Acinetobacter_variabilis_NIPH_2171	94.9806	Acinetobacter variabilis	GCA_013417335.1	https://ftp.ncbi.nlm.nih.gov/genomes/all/GCA/013/417/335/GCA_013417335.1_ASM1341733v1	soil	China: Jiangxi	blank
Acinetobacter_sp._YH12046	Acinetobacter_variabilis_NIPH_2171	94.9834	Acinetobacter variabilis	GCA_013419905.1	https://ftp.ncbi.nlm.nih.gov/genomes/all/GCA/013/419/905/GCA_013419905.1_ASM1341990v1	feces	China: Guangdong	pig
Acinetobacter_sp._GFQ9D192M	Acinetobacter_variabilis_NIPH_2171	95.0587	Acinetobacter variabilis	GCA_011192225.1	https://ftp.ncbi.nlm.nih.gov/genomes/all/GCA/011/192/225/GCA_011192225.1_ASM1119222v1	blank	China: Guangdong	duck
Acinetobacter_sp._YH1901152	Acinetobacter_variabilis_NIPH_2171	95.0725	Acinetobacter variabilis	GCA_013416895.1	https://ftp.ncbi.nlm.nih.gov/genomes/all/GCA/013/416/895/GCA_013416895.1_ASM1341689v1	feces	China: Jiangxi	pig
Acinetobacter_sp._GFQ9D191M	Acinetobacter_variabilis_NIPH_2171	95.0768	Acinetobacter variabilis	GCA_011174875.1	https://ftp.ncbi.nlm.nih.gov/genomes/all/GCA/011/174/875/GCA_011174875.1_ASM1117487v1	blank	China: Guangdong	duck
Acinetobacter_sp._YH12108	Acinetobacter_variabilis_NIPH_2171	95.0869	Acinetobacter variabilis	GCA_013419055.1	https://ftp.ncbi.nlm.nih.gov/genomes/all/GCA/013/419/055/GCA_013419055.1_ASM1341905v1	feces	China: Jiangsu	pig
Acinetobacter_sp._YH12035	Acinetobacter_variabilis_NIPH_2171	95.091	Acinetobacter variabilis	GCA_013419985.1	https://ftp.ncbi.nlm.nih.gov/genomes/all/GCA/013/419/985/GCA_013419985.1_ASM1341998v1	dust	China: Fujian	blank
Acinetobacter_sp._YH16049	Acinetobacter_variabilis_NIPH_2171	95.1111	Acinetobacter variabilis	GCA_013417175.1	https://ftp.ncbi.nlm.nih.gov/genomes/all/GCA/013/417/175/GCA_013417175.1_ASM1341717v1	feces	China: Jiangxi	pig
Acinetobacter_sp._YH12243	Acinetobacter_variabilis_NIPH_2171	95.1139	Acinetobacter variabilis	GCA_013417545.1	https://ftp.ncbi.nlm.nih.gov/genomes/all/GCA/013/417/545/GCA_013417545.1_ASM1341754v1	feces	China: Guangdong	pig
Acinetobacter_sp._YH12236	Acinetobacter_variabilis_NIPH_2171	95.1257	Acinetobacter variabilis	GCA_013417645.1	https://ftp.ncbi.nlm.nih.gov/genomes/all/GCA/013/417/645/GCA_013417645.1_ASM1341764v1	feces	China: Guangdong	pig
Acinetobacter_sp._YH12047	Acinetobacter_variabilis_NIPH_2171	95.144	Acinetobacter variabilis	GCA_013419895.1	https://ftp.ncbi.nlm.nih.gov/genomes/all/GCA/013/419/895/GCA_013419895.1_ASM1341989v1	sewage	China: Guangdong	blank
Acinetobacter_sp._YH12233	Acinetobacter_variabilis_NIPH_2171	95.1443	Acinetobacter variabilis	GCA_013417725.1	https://ftp.ncbi.nlm.nih.gov/genomes/all/GCA/013/417/725/GCA_013417725.1_ASM1341772v1	feces	China: Guangdong	pig
Acinetobacter_sp._YH12137	Acinetobacter_variabilis_NIPH_2171	95.1689	Acinetobacter variabilis	GCA_013418535.1	https://ftp.ncbi.nlm.nih.gov/genomes/all/GCA/013/418/535/GCA_013418535.1_ASM1341853v1	feces	China: Hainan	pig
Acinetobacter_sp._YH12043	Acinetobacter_variabilis_NIPH_2171	95.2008	Acinetobacter variabilis	GCA_013419915.1	https://ftp.ncbi.nlm.nih.gov/genomes/all/GCA/013/419/915/GCA_013419915.1_ASM1341991v1	feces	China: Guangdong	pig
Acinetobacter_sp._YH12235	Acinetobacter_variabilis_NIPH_2171	95.2077	Acinetobacter variabilis	GCA_013417705.1	https://ftp.ncbi.nlm.nih.gov/genomes/all/GCA/013/417/705/GCA_013417705.1_ASM1341770v1	feces	China: Guangdong	pig
Acinetobacter_sp._YH16038	Acinetobacter_variabilis_NIPH_2171	95.2123	Acinetobacter variabilis	GCA_013417275.1	https://ftp.ncbi.nlm.nih.gov/genomes/all/GCA/013/417/275/GCA_013417275.1_ASM1341727v1	soil	China: Jiangxi	blank
Acinetobacter_sp._YH12141	Acinetobacter_variabilis_NIPH_2171	95.2194	Acinetobacter variabilis	GCA_013418465.1	https://ftp.ncbi.nlm.nih.gov/genomes/all/GCA/013/418/465/GCA_013418465.1_ASM1341846v1	feces	China: Hainan	pig
Acinetobacter_sp._YH12143	Acinetobacter_variabilis_NIPH_2171	95.2357	Acinetobacter variabilis	GCA_013418375.1	https://ftp.ncbi.nlm.nih.gov/genomes/all/GCA/013/418/375/GCA_013418375.1_ASM1341837v1	sewage	China: Hainan	blank
Acinetobacter_sp._YH12248	Acinetobacter_variabilis_NIPH_2171	95.2359	Acinetobacter variabilis	GCA_013417455.1	https://ftp.ncbi.nlm.nih.gov/genomes/all/GCA/013/417/455/GCA_013417455.1_ASM1341745v1	feces	China: Guangdong	pig
Acinetobacter_sp._YH12041	Acinetobacter_variabilis_NIPH_2171	95.2443	Acinetobacter variabilis	GCA_013419975.1	https://ftp.ncbi.nlm.nih.gov/genomes/all/GCA/013/419/975/GCA_013419975.1_ASM1341997v1	feces	China: Guangdong	pig
Acinetobacter_sp._YH12245	Acinetobacter_variabilis_NIPH_2171	95.2471	Acinetobacter variabilis	GCA_013417575.1	https://ftp.ncbi.nlm.nih.gov/genomes/all/GCA/013/417/575/GCA_013417575.1_ASM1341757v1	feces	China: Guangdong	pig
Acinetobacter_variabilis_XM9F202-2	Acinetobacter_variabilis_NIPH_2171	95.2522	Acinetobacter variabilis	GCA_016607565.1	https://ftp.ncbi.nlm.nih.gov/genomes/all/GCA/016/607/565/GCA_016607565.1_ASM1660756v1	a feces sample of chicken origin	China: Nantong, jiangsu province	blank
Acinetobacter_sp._YH12072	Acinetobacter_variabilis_NIPH_2171	95.2617	Acinetobacter variabilis	GCA_013419565.1	https://ftp.ncbi.nlm.nih.gov/genomes/all/GCA/013/419/565/GCA_013419565.1_ASM1341956v1	feces	China: Guangdong	pig
Acinetobacter_sp._YH12242	Acinetobacter_variabilis_NIPH_2171	95.2702	Acinetobacter variabilis	GCA_013417555.1	https://ftp.ncbi.nlm.nih.gov/genomes/all/GCA/013/417/555/GCA_013417555.1_ASM1341755v1	feces	China: Guangdong	pig
Acinetobacter_sp._YH12249	Acinetobacter_variabilis_NIPH_2171	95.2913	Acinetobacter variabilis	GCA_013417475.1	https://ftp.ncbi.nlm.nih.gov/genomes/all/GCA/013/417/475/GCA_013417475.1_ASM1341747v1	dust	China: Guangdong	blank
Acinetobacter_sp._YH12244	Acinetobacter_variabilis_NIPH_2171	95.3097	Acinetobacter variabilis	GCA_013417565.1	https://ftp.ncbi.nlm.nih.gov/genomes/all/GCA/013/417/565/GCA_013417565.1_ASM1341756v1	feces	China: Guangdong	pig
Acinetobacter_sp._YH12241	Acinetobacter_variabilis_NIPH_2171	95.3109	Acinetobacter variabilis	GCA_013417535.1	https://ftp.ncbi.nlm.nih.gov/genomes/all/GCA/013/417/535/GCA_013417535.1_ASM1341753v1	feces	China: Guangdong	pig
Acinetobacter_sp._YH12247	Acinetobacter_variabilis_NIPH_2171	95.3136	Acinetobacter variabilis	GCA_013417485.1	https://ftp.ncbi.nlm.nih.gov/genomes/all/GCA/013/417/485/GCA_013417485.1_ASM1341748v1	feces	China: Guangdong	pig
Acinetobacter_variabilis_SCsl29	Acinetobacter_variabilis_NIPH_2171	95.32	Acinetobacter variabilis	GCA_009822135.1	https://ftp.ncbi.nlm.nih.gov/genomes/all/GCA/009/822/135/GCA_009822135.1_ASM982213v1	liver	blank	pig
Acinetobacter_sp._2JN-4	Acinetobacter_halotolerans_JCM_31009	95.3712	Acinetobacter halotolerans	GCA_003687745.1	https://ftp.ncbi.nlm.nih.gov/genomes/all/GCA/003/687/745/GCA_003687745.1_ASM368774v1	plant stem	China: Kumtag Desert	blank
Acinetobacter_oleivorans_TUM16158	Acinetobacter_oleivorans_DR1	95.389	Acinetobacter oleivorans	GCA_008580885.1	https://ftp.ncbi.nlm.nih.gov/genomes/all/GCA/008/580/885/GCA_008580885.1_ASM858088v1	human blood	Japan	Homo sapiens
Acinetobacter_oleivorans_TUM16157	Acinetobacter_oleivorans_DR1	95.3898	Acinetobacter oleivorans	GCA_008580865.1	https://ftp.ncbi.nlm.nih.gov/genomes/all/GCA/008/580/865/GCA_008580865.1_ASM858086v1	human blood	Japan	Homo sapiens
Acinetobacter_oleivorans_TUM15403	Acinetobacter_oleivorans_DR1	95.4172	Acinetobacter oleivorans	GCA_009003975.1	https://ftp.ncbi.nlm.nih.gov/genomes/all/GCA/009/003/975/GCA_009003975.1_ASM900397v1	human blood	Japan:Tokyo	Homo sapiens
Acinetobacter_oleivorans_TUM16156	Acinetobacter_oleivorans_DR1	95.419	Acinetobacter oleivorans	GCA_008580845.1	https://ftp.ncbi.nlm.nih.gov/genomes/all/GCA/008/580/845/GCA_008580845.1_ASM858084v1	human blood	Japan	Homo sapiens
Acinetobacter_oleivorans_TUM16159	Acinetobacter_oleivorans_DR1	95.4216	Acinetobacter oleivorans	GCA_008580905.1	https://ftp.ncbi.nlm.nih.gov/genomes/all/GCA/008/580/905/GCA_008580905.1_ASM858090v1	human blood	Japan	Homo sapiens
Acinetobacter_oleivorans_TUM16161	Acinetobacter_oleivorans_DR1	95.4278	Acinetobacter oleivorans	GCA_008580945.1	https://ftp.ncbi.nlm.nih.gov/genomes/all/GCA/008/580/945/GCA_008580945.1_ASM858094v1	catheter	Japan	blank
Acinetobacter_oleivorans_TUM16160	Acinetobacter_oleivorans_DR1	95.4376	Acinetobacter oleivorans	GCA_008580925.1	https://ftp.ncbi.nlm.nih.gov/genomes/all/GCA/008/580/925/GCA_008580925.1_ASM858092v1	catheter	Japan	blank
Acinetobacter_oleivorans_TUM16163	Acinetobacter_oleivorans_DR1	95.4393	Acinetobacter oleivorans	GCA_008581085.1	https://ftp.ncbi.nlm.nih.gov/genomes/all/GCA/008/581/085/GCA_008581085.1_ASM858108v1	human blood	Japan	Homo sapiens
Acinetobacter_oleivorans_TUM16164	Acinetobacter_oleivorans_DR1	95.4422	Acinetobacter oleivorans	GCA_008581205.1	https://ftp.ncbi.nlm.nih.gov/genomes/all/GCA/008/581/205/GCA_008581205.1_ASM858120v1	catheter	Japan	blank
Acinetobacter_oleivorans_TUM15155	Acinetobacter_oleivorans_DR1	95.4542	Acinetobacter oleivorans	GCA_008985105.1	https://ftp.ncbi.nlm.nih.gov/genomes/all/GCA/008/985/105/GCA_008985105.1_ASM898510v1	drain waste liquid	Japan:Kanagawa	blank
Acinetobacter_oleivorans_TUM16162	Acinetobacter_oleivorans_DR1	95.4574	Acinetobacter oleivorans	GCA_008580965.1	https://ftp.ncbi.nlm.nih.gov/genomes/all/GCA/008/580/965/GCA_008580965.1_ASM858096v1	catheter	Japan	blank
Acinetobacter_terrestris_ANC_4249	Acinetobacter_terrestris_ANC_4471	95.4677	Acinetobacter terrestris	GCA_004331185.1	https://ftp.ncbi.nlm.nih.gov/genomes/all/GCA/004/331/185/GCA_004331185.1_ASM433118v1	mud with water of a forest wetland	Czech Republic: Krivoklatsko forestland	blank
Acinetobacter_sp._JW	Acinetobacter_oleivorans_DR1	95.52	Acinetobacter oleivorans	GCA_003410005.1	https://ftp.ncbi.nlm.nih.gov/genomes/all/GCA/003/410/005/GCA_003410005.1_ASM341000v1	activated sludge from a local municipal sewage plant	China: Dalian	blank
Acinetobacter_sp._NIPH_817	Acinetobacter_oleivorans_DR1	95.5272	Acinetobacter oleivorans	GCA_000368405.1	https://ftp.ncbi.nlm.nih.gov/genomes/all/GCA/000/368/405/GCA_000368405.1_Acin_sp_NIPH817_V1	blank	blank	blank
Acinetobacter_oleivorans_TUM15416	Acinetobacter_oleivorans_DR1	95.5308	Acinetobacter oleivorans	GCA_009004655.1	https://ftp.ncbi.nlm.nih.gov/genomes/all/GCA/009/004/655/GCA_009004655.1_ASM900465v1	human blood	Japan:Tochigi	Homo sapiens
Acinetobacter_pittii_KCJK7889	Acinetobacter_pittii_ATCC_19004	95.5611	Acinetobacter pittii	GCA_003053325.1	https://ftp.ncbi.nlm.nih.gov/genomes/all/GCA/003/053/325/GCA_003053325.1_ASM305332v1	soil	USA: Florida	blank
Acinetobacter_pittii_LC510	Acinetobacter_pittii_ATCC_19004	95.562	Acinetobacter pittii	GCA_001005885.2	https://ftp.ncbi.nlm.nih.gov/genomes/all/GCA/001/005/885/GCA_001005885.2_ASM100588v2	Cave Surface Layer	USA: NM, Lechuguilla Cave	blank
Acinetobacter_johnsonii_UCO-489	Acinetobacter_johnsonii_DSM_6963	95.5949	Acinetobacter johnsonii	GCA_009789205.1	https://ftp.ncbi.nlm.nih.gov/genomes/all/GCA/009/789/205/GCA_009789205.1_ASM978920v1	Clinical setting	Chile: Santiago	blank
Acinetobacter_johnsonii_AJ_385	Acinetobacter_johnsonii_CIP_64.6	95.619	Acinetobacter johnsonii	GCA_003940285.1	https://ftp.ncbi.nlm.nih.gov/genomes/all/GCA/003/940/285/GCA_003940285.1_ASM394028v1	washroom sink in hospital intensive care unit	Pakistan	blank
Acinetobacter_oleivorans_TUM15548	Acinetobacter_oleivorans_DR1	95.6202	Acinetobacter oleivorans	GCA_009013815.1	https://ftp.ncbi.nlm.nih.gov/genomes/all/GCA/009/013/815/GCA_009013815.1_ASM901381v1	human sputum	Japan:Kanagawa	Homo sapiens
Acinetobacter_sp._CWB-G5	Acinetobacter_johnsonii_DSM_6963	95.634	Acinetobacter johnsonii	GCA_019209785.1	https://ftp.ncbi.nlm.nih.gov/genomes/all/GCA/019/209/785/GCA_019209785.1_ASM1920978v1	insect larvea	South Korea: Jeju	Protaetia brevitarsis seulensis
uncultured_Acinetobacter_sp._SRR5976596_bin.17_MetaBAT_v2.12.1_MAG	Acinetobacter_oleivorans_DR1	95.6565	Acinetobacter oleivorans	GCA_913009465.1	https://ftp.ncbi.nlm.nih.gov/genomes/all/GCA/913/009/465/GCA_913009465.1_SRR5976596_bin.17_MetaBAT_v2.12.1_MAG	marine metagenome	blank	blank
Acinetobacter_johnsonii_XBB1	Acinetobacter_johnsonii_CIP_64.6	95.6811	Acinetobacter johnsonii	GCA_001484935.1	https://ftp.ncbi.nlm.nih.gov/genomes/all/GCA/001/484/935/GCA_001484935.1_ASM148493v1	blank	blank	blank
Acinetobacter_johnsonii_CSUSB1	Acinetobacter_johnsonii_DSM_6963	95.6838	Acinetobacter johnsonii	GCA_020162195.1	https://ftp.ncbi.nlm.nih.gov/genomes/all/GCA/020/162/195/GCA_020162195.1_ASM2016219v1	garden soil	USA:California	blank
Acinetobacter_sp._KU_011TH	Acinetobacter_pittii_ATCC_19004	95.6857	Acinetobacter pittii	GCA_004360215.1	https://ftp.ncbi.nlm.nih.gov/genomes/all/GCA/004/360/215/GCA_004360215.1_ASM436021v1	Skin mucous	Thailand	Clarias macrocephalus (Gunther walking catfish)
Acinetobacter_sp._SwsAc7	Acinetobacter_johnsonii_DSM_6963	95.6898	Acinetobacter johnsonii	GCA_013391585.1	https://ftp.ncbi.nlm.nih.gov/genomes/all/GCA/013/391/585/GCA_013391585.1_ASM1339158v1	hospital sewage	China: Southwest	blank
Acinetobacter_sp._KU_013TH	Acinetobacter_pittii_ATCC_19004	95.699	Acinetobacter pittii	GCA_004360195.1	https://ftp.ncbi.nlm.nih.gov/genomes/all/GCA/004/360/195/GCA_004360195.1_ASM436019v1	blank	Thailand	Clarias macrocephalus (Gunther walking catfish)
Acinetobacter_johnsonii_B23	Acinetobacter_johnsonii_DSM_6963	95.7003	Acinetobacter johnsonii	GCA_012271875.1	https://ftp.ncbi.nlm.nih.gov/genomes/all/GCA/012/271/875/GCA_012271875.1_ASM1227187v1	blank	China	Oryza alta
Acinetobacter_johnsonii_WCHAJo010049	Acinetobacter_johnsonii_DSM_6963	95.7113	Acinetobacter johnsonii	GCA_004211815.1	https://ftp.ncbi.nlm.nih.gov/genomes/all/GCA/004/211/815/GCA_004211815.1_ASM421181v1	Sewage	China: Chengdu, Sichuan	blank
Acinetobacter_sp._ANC_4177	Acinetobacter_bouvetii_CIP_107468	95.7157	Acinetobacter bouvetii	GCA_004331975.1	https://ftp.ncbi.nlm.nih.gov/genomes/all/GCA/004/331/975/GCA_004331975.1_ASM433197v1	mud of a pond bottom	Czech Republic: Ortvinovice	blank
Acinetobacter_johnsonii_Acsw19	Acinetobacter_johnsonii_CIP_64.6	95.7194	Acinetobacter johnsonii	GCA_008180305.1	https://ftp.ncbi.nlm.nih.gov/genomes/all/GCA/008/180/305/GCA_008180305.1_ASM818030v1	sewage	China: Luzhou	blank
Acinetobacter_sp._SwsAc3	Acinetobacter_johnsonii_DSM_6963	95.7295	Acinetobacter johnsonii	GCA_013391495.1	https://ftp.ncbi.nlm.nih.gov/genomes/all/GCA/013/391/495/GCA_013391495.1_ASM1339149v1	hospital sewage	China: Southwest	blank
Acinetobacter_bouvetii_WCHABo060081	Acinetobacter_bouvetii_CIP_107468	95.754	Acinetobacter bouvetii	GCA_004209145.1	https://ftp.ncbi.nlm.nih.gov/genomes/all/GCA/004/209/145/GCA_004209145.1_ASM420914v1	Sewage	China: Chengdu, Sichuan	blank
Acinetobacter_johnsonii_18QD2AZ57W	Acinetobacter_johnsonii_DSM_6963	95.7701	Acinetobacter johnsonii	GCA_009828985.1	https://ftp.ncbi.nlm.nih.gov/genomes/all/GCA/009/828/985/GCA_009828985.1_ASM982898v1	feces	China: Shandong	pig
Acinetobacter_bohemicus_ANC_5076	Acinetobacter_bohemicus_ANC_3994	95.771	Acinetobacter bohemicus	GCA_900116265.1	https://ftp.ncbi.nlm.nih.gov/genomes/all/GCA/900/116/265/GCA_900116265.1_IMG-taxon_2675903032_annotated_assembly	blank	blank	blank
Acinetobacter_johnsonii_AJ_082	Acinetobacter_johnsonii_CIP_64.6	95.7843	Acinetobacter johnsonii	GCA_003939325.2	https://ftp.ncbi.nlm.nih.gov/genomes/all/GCA/003/939/325/GCA_003939325.2_ASM393932v2	washroom sink in hospital intensive care unit	Pakistan	blank
Acinetobacter_bohemicus_CCUG_69707	Acinetobacter_bohemicus_ANC_3994	95.7845	Acinetobacter bohemicus	GCA_008802275.1	https://ftp.ncbi.nlm.nih.gov/genomes/all/GCA/008/802/275/GCA_008802275.1_ASM880227v1	Textile dyeing wastewater treatment pond	Pakistan: Kohinoor Mills, Islamabad	blank
Acinetobacter_johnsonii_LXL_C1	Acinetobacter_johnsonii_CIP_64.6	95.79	Acinetobacter johnsonii	GCA_003335165.1	https://ftp.ncbi.nlm.nih.gov/genomes/all/GCA/003/335/165/GCA_003335165.1_ASM333516v1	blank	China	soil
Acinetobacter_johnsonii_XY27	Acinetobacter_johnsonii_DSM_6963	95.7952	Acinetobacter johnsonii	GCA_017068175.1	https://ftp.ncbi.nlm.nih.gov/genomes/all/GCA/017/068/175/GCA_017068175.1_ASM1706817v1	blank	China:Shanghai	Bigeye tuna
Acinetobacter_johnsonii_AJ01M	Acinetobacter_johnsonii_DSM_6963	95.8073	Acinetobacter johnsonii	GCA_900199565.1	https://ftp.ncbi.nlm.nih.gov/genomes/all/GCA/900/199/565/GCA_900199565.1_AJ01M	blank	blank	blank
Acinetobacter_sp._8I-beige	Acinetobacter_johnsonii_CIP_64.6	95.8092	Acinetobacter johnsonii	GCA_902505955.1	https://ftp.ncbi.nlm.nih.gov/genomes/all/GCA/902/505/955/GCA_902505955.1_ACIN8IBEIGE_assembly	blank	blank	blank
Acinetobacter_lwoffii_UBA1649	Acinetobacter_lwoffii_CIP_64.10	95.8199	Acinetobacter lwoffii	GCA_002321025.1	https://ftp.ncbi.nlm.nih.gov/genomes/all/GCA/002/321/025/GCA_002321025.1_ASM232102v1	metal/plastic	USA:New York City	blank
Acinetobacter_johnsonii_FDAARGOS_1092	Acinetobacter_johnsonii_CIP_64.6	95.8277	Acinetobacter johnsonii	GCA_016728805.1	https://ftp.ncbi.nlm.nih.gov/genomes/all/GCA/016/728/805/GCA_016728805.1_ASM1672880v1	blank	Germany: Braunschweig	blank
Acinetobacter_sp._BMW17	Acinetobacter_johnsonii_DSM_6963	95.8518	Acinetobacter johnsonii	GCA_001592855.1	https://ftp.ncbi.nlm.nih.gov/genomes/all/GCA/001/592/855/GCA_001592855.1_ASM159285v1	rhizospheric region of Phragmites karka from brackish water lake	India: Odisha, Chilika Lake, Kalupadaghat	blank
Acinetobacter_calcoaceticus_CC170	Acinetobacter_calcoaceticus_DSM_30006	95.8715	Acinetobacter calcoaceticus	GCA_017877315.1	https://ftp.ncbi.nlm.nih.gov/genomes/all/GCA/017/877/315/GCA_017877315.1_ASM1787731v1	blank	blank	blank
Acinetobacter_johnsonii_C6	Acinetobacter_johnsonii_DSM_6963	95.8776	Acinetobacter johnsonii	GCA_900162715.1	https://ftp.ncbi.nlm.nih.gov/genomes/all/GCA/900/162/715/GCA_900162715.1_ASM90016271v1	blank	blank	blank
Acinetobacter_johnsonii_ANC_3681	Acinetobacter_johnsonii_CIP_64.6	95.8841	Acinetobacter johnsonii	GCA_000368805.1	https://ftp.ncbi.nlm.nih.gov/genomes/all/GCA/000/368/805/GCA_000368805.1_Acin_john_ANC_3681_V1	blank	blank	blank
Acinetobacter_pittii_2010C01-170	Acinetobacter_pittii_ATCC_19004	95.8931	Acinetobacter pittii	GCA_003354845.1	https://ftp.ncbi.nlm.nih.gov/genomes/all/GCA/003/354/845/GCA_003354845.1_ASM335484v1	blank	Taiwan	Homo sapiens
Acinetobacter_johnsonii_M19	Acinetobacter_johnsonii_CIP_64.6	95.8959	Acinetobacter johnsonii	GCA_004337595.1	https://ftp.ncbi.nlm.nih.gov/genomes/all/GCA/004/337/595/GCA_004337595.1_ASM433759v1	water	China:Shandong	blank
Acinetobacter_johnsonii_MB44	Acinetobacter_johnsonii_CIP_64.6	95.9035	Acinetobacter johnsonii	GCA_001483265.1	https://ftp.ncbi.nlm.nih.gov/genomes/all/GCA/001/483/265/GCA_001483265.1_ASM148326v1	blank	China: Wuhan	Populus lasiocarpa
Acinetobacter_johnsonii_JH7	Acinetobacter_johnsonii_DSM_6963	95.9047	Acinetobacter johnsonii	GCA_009823385.1	https://ftp.ncbi.nlm.nih.gov/genomes/all/GCA/009/823/385/GCA_009823385.1_ASM982338v1	mine tailings	China: Guangxi	blank
Acinetobacter_pittii_2012N08-034	Acinetobacter_pittii_ATCC_19004	95.9081	Acinetobacter pittii	GCA_003359215.2	https://ftp.ncbi.nlm.nih.gov/genomes/all/GCA/003/359/215/GCA_003359215.2_ASM335921v2	blank	Taiwan	Homo sapiens
Acinetobacter_johnsonii_Aj2199	Acinetobacter_johnsonii_DSM_6963	95.9141	Acinetobacter johnsonii	GCA_001632325.1	https://ftp.ncbi.nlm.nih.gov/genomes/all/GCA/001/632/325/GCA_001632325.1_ASM163232v1	peritoneal fluid	Argentina: Buenos Aires	Homo sapiens
Acinetobacter_pittii_Aci00901	Acinetobacter_pittii_ATCC_19004	95.9233	Acinetobacter pittii	GCA_904887545.1	https://ftp.ncbi.nlm.nih.gov/genomes/all/GCA/904/887/545/GCA_904887545.1_Aci00901-181205_contigs_filtered.fa.gz	clinical material	blank	blank
Acinetobacter_sp._NEB_394	Acinetobacter_johnsonii_CIP_64.6	95.9244	Acinetobacter johnsonii	GCA_013374795.1	https://ftp.ncbi.nlm.nih.gov/genomes/all/GCA/013/374/795/GCA_013374795.1_ASM1337479v1	soil	USA:Massachusetts	blank
Acinetobacter_johnsonii_FDAARGOS_1094	Acinetobacter_johnsonii_CIP_64.6	95.9248	Acinetobacter johnsonii	GCA_016726625.1	https://ftp.ncbi.nlm.nih.gov/genomes/all/GCA/016/726/625/GCA_016726625.1_ASM1672662v1	blank	Germany: Braunschweig	blank
Acinetobacter_johnsonii_IC001	Acinetobacter_johnsonii_CIP_64.6	95.9335	Acinetobacter johnsonii	GCA_003952785.1	https://ftp.ncbi.nlm.nih.gov/genomes/all/GCA/003/952/785/GCA_003952785.1_ASM395278v1	water	Japan: Tokyo	blank
Acinetobacter_sp._yr461_YR461	Acinetobacter_calcoaceticus_DSM_30006	95.9465	Acinetobacter calcoaceticus	GCA_900110445.1	https://ftp.ncbi.nlm.nih.gov/genomes/all/GCA/900/110/445/GCA_900110445.1_IMG-taxon_2615840642_annotated_assembly	blank	blank	blank
Acinetobacter_sp._SwsAc2	Acinetobacter_johnsonii_DSM_6963	95.9507	Acinetobacter johnsonii	GCA_013391465.1	https://ftp.ncbi.nlm.nih.gov/genomes/all/GCA/013/391/465/GCA_013391465.1_ASM1339146v1	hospital sewage	China: Southwest	blank
Acinetobacter_johnsonii_FDAARGOS_1093	Acinetobacter_johnsonii_CIP_64.6	95.9579	Acinetobacter johnsonii	GCA_016725945.1	https://ftp.ncbi.nlm.nih.gov/genomes/all/GCA/016/725/945/GCA_016725945.1_ASM1672594v1	blank	Germany: Braunschweig	blank
Acinetobacter_sp._YH16052	Acinetobacter_lwoffii_CIP_64.10	95.967	Acinetobacter lwoffii	GCA_013417155.1	https://ftp.ncbi.nlm.nih.gov/genomes/all/GCA/013/417/155/GCA_013417155.1_ASM1341715v1	feces	China: Hunan	pig
Acinetobacter_johnsonii_MR1	Acinetobacter_bouvetii_DSM_14964	95.9671	Acinetobacter bouvetii	GCA_019334405.1	https://ftp.ncbi.nlm.nih.gov/genomes/all/GCA/019/334/405/GCA_019334405.1_ASM1933440v1	water	China:Jinan	blank
Acinetobacter_lwoffii_12CE1	Acinetobacter_lwoffii_CIP_64.10	95.9763	Acinetobacter lwoffii	GCA_015602705.1	https://ftp.ncbi.nlm.nih.gov/genomes/all/GCA/015/602/705/GCA_015602705.1_ASM1560270v1	Prawn digestive tract	Australia: Queensland	Penaeus plebejus
Acinetobacter_pittii_Survcare344	Acinetobacter_pittii_ATCC_19004	95.9894	Acinetobacter pittii	GCA_018422535.1	https://ftp.ncbi.nlm.nih.gov/genomes/all/GCA/018/422/535/GCA_018422535.1_ASM1842253v1	Rectal swab/stool	Germany	Homo sapiens
Acinetobacter_calcoaceticus_E1	Acinetobacter_calcoaceticus_DSM_30006	95.9978	Acinetobacter calcoaceticus	GCA_016082245.1	https://ftp.ncbi.nlm.nih.gov/genomes/all/GCA/016/082/245/GCA_016082245.1_ASM1608224v1	soil	United Kingdom: York	blank
Acinetobacter_johnsonii_UBA11272	Acinetobacter_johnsonii_DSM_6963	96.0008	Acinetobacter johnsonii	GCA_003523415.1	https://ftp.ncbi.nlm.nih.gov/genomes/all/GCA/003/523/415/GCA_003523415.1_ASM352341v1	metagenome	blank	blank
Acinetobacter_johnsonii_S00116	Acinetobacter_johnsonii_DSM_6963	96.0014	Acinetobacter johnsonii	GCA_014204355.1	https://ftp.ncbi.nlm.nih.gov/genomes/all/GCA/014/204/355/GCA_014204355.1_ASM1420435v1	blank	USA: Texas	blank
Acinetobacter_calcoaceticus_ACIN00262	Acinetobacter_calcoaceticus_DSM_30006	96.0061	Acinetobacter calcoaceticus	GCA_016506125.1	https://ftp.ncbi.nlm.nih.gov/genomes/all/GCA/016/506/125/GCA_016506125.1_ASM1650612v1	respiratory	USA: Pittsburgh, Pennsylvania	Homo sapiens
Acinetobacter_lwoffii_H7	Acinetobacter_lwoffii_CIP_64.10	96.0066	Acinetobacter lwoffii	GCA_019343495.1	https://ftp.ncbi.nlm.nih.gov/genomes/all/GCA/019/343/495/GCA_019343495.1_ASM1934349v1	chickens	China:Wenzhou	blank
Acinetobacter_johnsonii_E10B	Acinetobacter_johnsonii_CIP_64.6	96.0096	Acinetobacter johnsonii	GCA_015602645.1	https://ftp.ncbi.nlm.nih.gov/genomes/all/GCA/015/602/645/GCA_015602645.1_ASM1560264v1	Prawn digestive tract	Australia: East coast	Penaeus plebejus
Acinetobacter_pittii_UKK-0520	Acinetobacter_pittii_ATCC_19004	96.01	Acinetobacter pittii	GCA_001706135.1	https://ftp.ncbi.nlm.nih.gov/genomes/all/GCA/001/706/135/GCA_001706135.1_ASM170613v1	blank	Germany: Bochum	Homo sapiens
Acinetobacter_calcoaceticus_TUM15316	Acinetobacter_calcoaceticus_CIP_81.8	96.0112	Acinetobacter calcoaceticus	GCA_008996575.1	https://ftp.ncbi.nlm.nih.gov/genomes/all/GCA/008/996/575/GCA_008996575.1_ASM899657v1	human sputum	Japan:Tokyo	Homo sapiens
Acinetobacter_sp._YH12226	Acinetobacter_lwoffii_CIP_64.10	96.0209	Acinetobacter lwoffii	GCA_013417805.1	https://ftp.ncbi.nlm.nih.gov/genomes/all/GCA/013/417/805/GCA_013417805.1_ASM1341780v1	vegetable	China: Jiangsu	blank
Acinetobacter_sp._MF4640	Acinetobacter_johnsonii_DSM_6963	96.0335	Acinetobacter johnsonii	GCA_002018895.1	https://ftp.ncbi.nlm.nih.gov/genomes/all/GCA/002/018/895/GCA_002018895.1_ASM201889v1	meat processing facility	Norway	blank
Acinetobacter_lwoffii_UBA2051	Acinetobacter_lwoffii_CIP_64.10	96.0497	Acinetobacter lwoffii	GCA_002332985.1	https://ftp.ncbi.nlm.nih.gov/genomes/all/GCA/002/332/985/GCA_002332985.1_ASM233298v1	metal/plastic	USA:New York City	blank
Acinetobacter_calcoaceticus_TUM15122	Acinetobacter_calcoaceticus_CIP_81.8	96.0517	Acinetobacter calcoaceticus	GCA_008983275.1	https://ftp.ncbi.nlm.nih.gov/genomes/all/GCA/008/983/275/GCA_008983275.1_ASM898327v1	human sputum	Japan:Tokyo	Homo sapiens
Acinetobacter_sp._BHS4	Acinetobacter_pittii_ATCC_19004	96.0528	Acinetobacter pittii	GCA_018454425.1	https://ftp.ncbi.nlm.nih.gov/genomes/all/GCA/018/454/425/GCA_018454425.1_ASM1845442v1	AC condensate	China: Mongkok, Hong Kong	blank
Acinetobacter_sp._AR2-3	Acinetobacter_lwoffii_CIP_64.10	96.0744	Acinetobacter lwoffii	GCA_001878775.1	https://ftp.ncbi.nlm.nih.gov/genomes/all/GCA/001/878/775/GCA_001878775.1_ASM187877v1	blank	China: Jiuzhaigou	Anopheles sinensis
Acinetobacter_pittii_WCHAP100012	Acinetobacter_pittii_DSM_25618	96.0767	Acinetobacter pittii	GCA_004209305.1	https://ftp.ncbi.nlm.nih.gov/genomes/all/GCA/004/209/305/GCA_004209305.1_ASM420930v1	blank	China: Chengdu, Sichuan	Homo sapiens
Acinetobacter_johnsonii_SH046	Acinetobacter_johnsonii_DSM_6963	96.0844	Acinetobacter johnsonii	GCA_000162055.1	https://ftp.ncbi.nlm.nih.gov/genomes/all/GCA/000/162/055/GCA_000162055.1_ASM16205v1	blank	blank	blank
Acinetobacter_tandoii_SC36	Acinetobacter_kanungonis_PS-1	96.1022	Acinetobacter kanungonis	GCA_002795165.1	https://ftp.ncbi.nlm.nih.gov/genomes/all/GCA/002/795/165/GCA_002795165.1_ASM279516v1	mangrove wetland sludge	China: Hainan	blank
Acinetobacter_terrae_ANC_4277	Acinetobacter_terrae_ANC_4282	96.1232	Acinetobacter terrae	GCA_013004275.1	https://ftp.ncbi.nlm.nih.gov/genomes/all/GCA/013/004/275/GCA_013004275.1_ASM1300427v1	Mud of a forest creek bank	Czech Republic: Krivoklatsko forestland	blank
Acinetobacter_johnsonii_UBA2045	Acinetobacter_johnsonii_CIP_64.6	96.1311	Acinetobacter johnsonii	GCA_002333325.1	https://ftp.ncbi.nlm.nih.gov/genomes/all/GCA/002/333/325/GCA_002333325.1_ASM233332v1	metal	USA:New York City	blank
Acinetobacter_lwoffii_GC2	Acinetobacter_lwoffii_CIP_64.10	96.1381	Acinetobacter lwoffii	GCA_011058205.1	https://ftp.ncbi.nlm.nih.gov/genomes/all/GCA/011/058/205/GCA_011058205.1_ASM1105820v1	Petroleum-contaminated soil	Turkey: Diyarbakir	blank
Acinetobacter_lwoffii_TG19636	Acinetobacter_lwoffii_CIP_64.10	96.1586	Acinetobacter lwoffii	GCA_000301755.1	https://ftp.ncbi.nlm.nih.gov/genomes/all/GCA/000/301/755/GCA_000301755.1_ASM30175v1	urine	blank	Homo sapiens
Acinetobacter_tandoii_SE63	Acinetobacter_kanungonis_PS-1	96.165	Acinetobacter kanungonis	GCA_006965565.1	https://ftp.ncbi.nlm.nih.gov/genomes/all/GCA/006/965/565/GCA_006965565.1_ASM696556v1	mangrove wetland ecosystem	China: Hainan province	blank
Acinetobacter_junii_ZM06	Acinetobacter_kanungonis_PS-1	96.171	Acinetobacter kanungonis	GCA_019048765.1	https://ftp.ncbi.nlm.nih.gov/genomes/all/GCA/019/048/765/GCA_019048765.1_ASM1904876v1	soil	China	blank
Acinetobacter_sp._MF4642	Acinetobacter_johnsonii_DSM_6963	96.1758	Acinetobacter johnsonii	GCA_002018925.1	https://ftp.ncbi.nlm.nih.gov/genomes/all/GCA/002/018/925/GCA_002018925.1_ASM201892v1	meat processing facility	Norway	blank
Acinetobacter_sp._CIP_51.11	Acinetobacter_lwoffii_CIP_64.10	96.1788	Acinetobacter lwoffii	GCA_000369665.1	https://ftp.ncbi.nlm.nih.gov/genomes/all/GCA/000/369/665/GCA_000369665.1_Acin_sp_CIP_51_11_V1	blank	blank	blank
Acinetobacter_lwoffii_NIPH_478	Acinetobacter_lwoffii_CIP_64.10	96.1858	Acinetobacter lwoffii	GCA_000369145.1	https://ftp.ncbi.nlm.nih.gov/genomes/all/GCA/000/369/145/GCA_000369145.1_Acin_lwof_NIPH_478_V1	blank	blank	blank
Acinetobacter_sp._YH01021	Acinetobacter_lwoffii_CIP_64.10	96.1938	Acinetobacter lwoffii	GCA_013420255.1	https://ftp.ncbi.nlm.nih.gov/genomes/all/GCA/013/420/255/GCA_013420255.1_ASM1342025v1	dust	China: Zhejiang	blank
Acinetobacter_sp._CIP_64.7	Acinetobacter_lwoffii_CIP_64.10	96.1947	Acinetobacter lwoffii	GCA_000369745.1	https://ftp.ncbi.nlm.nih.gov/genomes/all/GCA/000/369/745/GCA_000369745.1_Acin_sp_CIP_64_7_V1	blank	blank	blank
Acinetobacter_sp._C13	Acinetobacter_pittii_ATCC_19004	96.2013	Acinetobacter pittii	GCA_016809775.1	https://ftp.ncbi.nlm.nih.gov/genomes/all/GCA/016/809/775/GCA_016809775.1_ASM1680977v1	soil	China	blank
Acinetobacter_pittii_32292	Acinetobacter_pittii_ATCC_19004	96.2208	Acinetobacter pittii	GCA_020544425.1	https://ftp.ncbi.nlm.nih.gov/genomes/all/GCA/020/544/425/GCA_020544425.1_ASM2054442v1	wastewater	Portugal: Lisbon	blank
Acinetobacter_sp._c1_C1	Acinetobacter_pittii_ATCC_19004	96.2245	Acinetobacter pittii	GCA_016424515.1	https://ftp.ncbi.nlm.nih.gov/genomes/all/GCA/016/424/515/GCA_016424515.1_ASM1642451v1	blank	China	blank
Acinetobacter_brisouii_SM1	Acinetobacter_brisouii_CIP_110357	96.228	Acinetobacter brisouii	GCA_000964015.1	https://ftp.ncbi.nlm.nih.gov/genomes/all/GCA/000/964/015/GCA_000964015.1_ASM96401v1	river in Endau-Rompin National Park	Malaysia: Johor	blank
Acinetobacter_lwoffii_EK30A	Acinetobacter_lwoffii_CIP_64.10	96.2331	Acinetobacter lwoffii	GCA_019787625.1	https://ftp.ncbi.nlm.nih.gov/genomes/all/GCA/019/787/625/GCA_019787625.1_ASM1978762v1	permafrost, Kolyma lowland	Russia	blank
Acinetobacter_sp._CIP_102136	Acinetobacter_lwoffii_CIP_64.10	96.2369	Acinetobacter lwoffii	GCA_000369685.1	https://ftp.ncbi.nlm.nih.gov/genomes/all/GCA/000/369/685/GCA_000369685.1_Acin_sp_CIP_102136_V1	blank	blank	blank
Acinetobacter_terrestris_NIPH_2377	Acinetobacter_terrestris_ANC_4471	96.2391	Acinetobacter terrestris	GCA_013004435.1	https://ftp.ncbi.nlm.nih.gov/genomes/all/GCA/013/004/435/GCA_013004435.1_ASM1300443v1	feces	Netherlands: Wageningen	Cow
Acinetobacter_lwoffii_FDAARGOS_620	Acinetobacter_lwoffii_CIP_64.10	96.247	Acinetobacter lwoffii	GCA_012393445.1	https://ftp.ncbi.nlm.nih.gov/genomes/all/GCA/012/393/445/GCA_012393445.1_ASM1239344v1	clinical isolate	USA: MI	Homo sapiens
Acinetobacter_pittii_JXA13	Acinetobacter_pittii_ATCC_19004	96.2561	Acinetobacter pittii	GCA_016804045.1	https://ftp.ncbi.nlm.nih.gov/genomes/all/GCA/016/804/045/GCA_016804045.1_ASM1680404v1	dog	China:Nanchang	blank
Acinetobacter_lwoffii_SU1904	Acinetobacter_lwoffii_CIP_64.10	96.2638	Acinetobacter lwoffii	GCA_014769185.1	https://ftp.ncbi.nlm.nih.gov/genomes/all/GCA/014/769/185/GCA_014769185.1_ASM1476918v1	bile	Japan	Homo sapiens
Acinetobacter_lwoffii_ATCC_9957__CIP_70.31	Acinetobacter_lwoffii_CIP_64.10	96.2649	Acinetobacter lwoffii	GCA_000369125.1	https://ftp.ncbi.nlm.nih.gov/genomes/all/GCA/000/369/125/GCA_000369125.1_Acin_lwof_CIP_70_31_V1	blank	blank	blank
Acinetobacter_variabilis_AV_175	Acinetobacter_variabilis_NIPH_2171	96.2727	Acinetobacter variabilis	GCA_003938405.2	https://ftp.ncbi.nlm.nih.gov/genomes/all/GCA/003/938/405/GCA_003938405.2_ASM393840v2	alcohol foam dispenser in hospital intensive care unit	Pakistan	blank
Acinetobacter_venetianus_LUH13518	Acinetobacter_venetianus_RAG-1	96.2772	Acinetobacter venetianus	GCA_001584655.1	https://ftp.ncbi.nlm.nih.gov/genomes/all/GCA/001/584/655/GCA_001584655.1_ASM158465v1	blank	blank	blank
Acinetobacter_guillouiae_CC160	Acinetobacter_guillouiae_CCUG_2491	96.2893	Acinetobacter guillouiae	GCA_017877275.1	https://ftp.ncbi.nlm.nih.gov/genomes/all/GCA/017/877/275/GCA_017877275.1_ASM1787727v1	blank	blank	blank
Acinetobacter_sp._WY4	Acinetobacter_lwoffii_CIP_64.10	96.2899	Acinetobacter lwoffii	GCA_018438165.1	https://ftp.ncbi.nlm.nih.gov/genomes/all/GCA/018/438/165/GCA_018438165.1_ASM1843816v1	blank	Antarctica	Euphausia superba
Acinetobacter_pittii_IEC338SC	Acinetobacter_pittii_ATCC_19004	96.2915	Acinetobacter pittii	GCA_001617545.1	https://ftp.ncbi.nlm.nih.gov/genomes/all/GCA/001/617/545/GCA_001617545.1_ASM161754v1	tracheal secretion	Brazil	Homo sapiens
Acinetobacter_pittii_MCR53	Acinetobacter_pittii_ATCC_19004	96.2964	Acinetobacter pittii	GCA_002927955.1	https://ftp.ncbi.nlm.nih.gov/genomes/all/GCA/002/927/955/GCA_002927955.1_ASM292795v1	Endobronchial tube	Honduras: Cortes, San Pedro Sula	Homo sapiens
Acinetobacter_pittii_Aci00905	Acinetobacter_pittii_ATCC_19004	96.3029	Acinetobacter pittii	GCA_904887685.1	https://ftp.ncbi.nlm.nih.gov/genomes/all/GCA/904/887/685/GCA_904887685.1_Aci00905-181108_contigs_filtered.fa.gz	clinical material	blank	blank
Acinetobacter_sp._826659	Acinetobacter_pittii_ATCC_19004	96.3037	Acinetobacter pittii	GCA_000588515.1	https://ftp.ncbi.nlm.nih.gov/genomes/all/GCA/000/588/515/GCA_000588515.1_ASM58851v1	sputum	USA	Homo sapiens
Acinetobacter_lwoffii_FDAARGOS_557	Acinetobacter_lwoffii_CIP_64.10	96.3052	Acinetobacter lwoffii	GCA_013349205.1	https://ftp.ncbi.nlm.nih.gov/genomes/all/GCA/013/349/205/GCA_013349205.1_ASM1334920v1	clinical isolate	USA: MN	Homo sapiens
Acinetobacter_calcoaceticus_ANC_3680	Acinetobacter_calcoaceticus_CIP_81.8	96.3217	Acinetobacter calcoaceticus	GCA_000368945.1	https://ftp.ncbi.nlm.nih.gov/genomes/all/GCA/000/368/945/GCA_000368945.1_Acin_calc_ANC_3680_V1	blank	blank	blank
Acinetobacter_sp._CIP_101966	Acinetobacter_lwoffii_CIP_64.10	96.3253	Acinetobacter lwoffii	GCA_000369725.1	https://ftp.ncbi.nlm.nih.gov/genomes/all/GCA/000/369/725/GCA_000369725.1_Acin_sp_CIP_101966_V1	blank	blank	blank
Acinetobacter_sp._LMB-5	Acinetobacter_pittii_ATCC_19004	96.3255	Acinetobacter pittii	GCA_001541635.1	https://ftp.ncbi.nlm.nih.gov/genomes/all/GCA/001/541/635/GCA_001541635.1_ASM154163v1	greenhouse soil	China: Nanjing	blank
Acinetobacter_terrestris_ANC_4472	Acinetobacter_terrestris_ANC_4471	96.3275	Acinetobacter terrestris	GCA_004331115.1	https://ftp.ncbi.nlm.nih.gov/genomes/all/GCA/004/331/115/GCA_004331115.1_ASM433111v1	cave, the surface of limestone	Czech Republic: Moravsky Kras	blank
Acinetobacter_sp._Leaf130	Acinetobacter_calcoaceticus_DSM_30006	96.3278	Acinetobacter calcoaceticus	GCA_001423205.1	https://ftp.ncbi.nlm.nih.gov/genomes/all/GCA/001/423/205/GCA_001423205.1_Leaf130	leaf	Switzerland: Zurich	Arabidopsis thaliana
Acinetobacter_pittii_TCM178	Acinetobacter_pittii_ATCC_19004	96.3297	Acinetobacter pittii	GCA_001716945.1	https://ftp.ncbi.nlm.nih.gov/genomes/all/GCA/001/716/945/GCA_001716945.1_ASM171694v1	sputum	China: Hangzhou	Homo sapiens
Acinetobacter_lwoffii_SH145	Acinetobacter_lwoffii_CIP_64.10	96.3302	Acinetobacter lwoffii	GCA_000162095.1	https://ftp.ncbi.nlm.nih.gov/genomes/all/GCA/000/162/095/GCA_000162095.1_ASM16209v1	blank	blank	blank
Acinetobacter_calcoaceticus_TG19593	Acinetobacter_calcoaceticus_DSM_30006	96.3342	Acinetobacter calcoaceticus	GCA_000301675.1	https://ftp.ncbi.nlm.nih.gov/genomes/all/GCA/000/301/675/GCA_000301675.1_ASM30167v1	environment	blank	blank
Acinetobacter_sp._NEB149	Acinetobacter_lwoffii_CIP_64.10	96.3348	Acinetobacter lwoffii	GCA_012516415.1	https://ftp.ncbi.nlm.nih.gov/genomes/all/GCA/012/516/415/GCA_012516415.1_ASM1251641v1	R.J.Roberts	blank	blank
Acinetobacter_pittii_AC1640	Acinetobacter_pittii_ATCC_19004	96.3424	Acinetobacter pittii	GCA_017162095.1	https://ftp.ncbi.nlm.nih.gov/genomes/all/GCA/017/162/095/GCA_017162095.1_ASM1716209v1	endotracheal tube swab	Malaysia	Homo sapiens
Acinetobacter_calcoaceticus_OVA10B	Acinetobacter_calcoaceticus_DSM_30006	96.3648	Acinetobacter calcoaceticus	GCA_019970105.1	https://ftp.ncbi.nlm.nih.gov/genomes/all/GCA/019/970/105/GCA_019970105.1_ASM1997010v1	vegetable	USA: Detroit, Michigan, urban community garden	blank
Acinetobacter_baumannii_DE0058	Acinetobacter_courvalinii_CCM_8635	96.3734	Acinetobacter courvalinii	GCA_008764415.1	https://ftp.ncbi.nlm.nih.gov/genomes/all/GCA/008/764/415/GCA_008764415.1_FS152	environmental	USA: North Carolina, Durham	blank
Acinetobacter_pittii_ARLG1942	Acinetobacter_pittii_DSM_25618	96.3756	Acinetobacter pittii	GCA_002145265.1	https://ftp.ncbi.nlm.nih.gov/genomes/all/GCA/002/145/265/GCA_002145265.1_ASM214526v1	blank	blank	blank
Acinetobacter_lwoffii_S00127	Acinetobacter_lwoffii_CIP_64.10	96.3798	Acinetobacter lwoffii	GCA_014207875.1	https://ftp.ncbi.nlm.nih.gov/genomes/all/GCA/014/207/875/GCA_014207875.1_ASM1420787v1	blank	USA: Texas	blank
Acinetobacter_guillouiae_TUM15313	Acinetobacter_guillouiae_CCUG_2491	96.3804	Acinetobacter guillouiae	GCA_008996235.1	https://ftp.ncbi.nlm.nih.gov/genomes/all/GCA/008/996/235/GCA_008996235.1_ASM899623v1	human sputum	Japan:Tokyo	Homo sapiens
Acinetobacter_lwoffii_FDAARGOS_551	Acinetobacter_lwoffii_CIP_64.10	96.3817	Acinetobacter lwoffii	GCA_013349125.1	https://ftp.ncbi.nlm.nih.gov/genomes/all/GCA/013/349/125/GCA_013349125.1_ASM1334912v1	clinical isolate	USA: MN	Homo sapiens
Acinetobacter_lwoffii_FDAARGOS_1394	Acinetobacter_lwoffii_CIP_64.10	96.3825	Acinetobacter lwoffii	GCA_019048525.1	https://ftp.ncbi.nlm.nih.gov/genomes/all/GCA/019/048/525/GCA_019048525.1_ASM1904852v1	blank	Germany: Braunschweig	blank
Acinetobacter_guillouiae_NBRC_110550	Acinetobacter_guillouiae_CCUG_2491	96.385	Acinetobacter guillouiae	GCA_002370525.2	https://ftp.ncbi.nlm.nih.gov/genomes/all/GCA/002/370/525/GCA_002370525.2_ASM237052v2	blank	blank	blank
Acinetobacter_calcoaceticus_FDAARGOS_1218	Acinetobacter_calcoaceticus_DSM_30006	96.3891	Acinetobacter calcoaceticus	GCA_016939475.1	https://ftp.ncbi.nlm.nih.gov/genomes/all/GCA/016/939/475/GCA_016939475.1_ASM1693947v1	blank	Germany: Braunschweig	blank
Acinetobacter_lwoffii_MGYG-HGUT-00082	Acinetobacter_lwoffii_CIP_64.10	96.3904	Acinetobacter lwoffii	GCA_902363005.1	https://ftp.ncbi.nlm.nih.gov/genomes/all/GCA/902/363/005/GCA_902363005.1_MGYG-HGUT-00082	human gut	blank	blank
Acinetobacter_terrae_ANC_5380	Acinetobacter_terrae_ANC_4282	96.3999	Acinetobacter terrae	GCA_013004255.1	https://ftp.ncbi.nlm.nih.gov/genomes/all/GCA/013/004/255/GCA_013004255.1_ASM1300425v1	Mud of a seasonal forest creek	Czech Republic: Dobris	blank
Acinetobacter_pittii_NBRC_110514	Acinetobacter_pittii_ATCC_19004	96.4002	Acinetobacter pittii	GCA_006538605.1	https://ftp.ncbi.nlm.nih.gov/genomes/all/GCA/006/538/605/GCA_006538605.1_ASM653860v1	blank	blank	blank
Acinetobacter_pittii_T167	Acinetobacter_pittii_ATCC_19004	96.4017	Acinetobacter pittii	GCA_000805655.1	https://ftp.ncbi.nlm.nih.gov/genomes/all/GCA/000/805/655/GCA_000805655.1_ASM80565v1	blank	Thailand: Bangkok	Homo sapiens
Acinetobacter_calcoaceticus_P23	Acinetobacter_calcoaceticus_DSM_30006	96.4054	Acinetobacter calcoaceticus	GCA_000818215.1	https://ftp.ncbi.nlm.nih.gov/genomes/all/GCA/000/818/215/GCA_000818215.1_ASM81821v1	blank	blank	blank
Acinetobacter_sp._WC-323	Acinetobacter_courvalinii_CCM_8635	96.4109	Acinetobacter courvalinii	GCA_000314615.1	https://ftp.ncbi.nlm.nih.gov/genomes/all/GCA/000/314/615/GCA_000314615.1_gacin30v1.0	health care equipment surface	Iraq: Camp Delta	blank
Acinetobacter_terrestris_ANC_5084	Acinetobacter_terrestris_ANC_4471	96.4142	Acinetobacter terrestris	GCA_013004415.1	https://ftp.ncbi.nlm.nih.gov/genomes/all/GCA/013/004/415/GCA_013004415.1_ASM1300441v1	Soil of a dry creekbed	Turkey: Pecenek	blank
Acinetobacter_pittii_AP007	Acinetobacter_pittii_ATCC_19004	96.4145	Acinetobacter pittii	GCA_006351765.1	https://ftp.ncbi.nlm.nih.gov/genomes/all/GCA/006/351/765/GCA_006351765.1_ASM635176v1	hospital	Canada:Vancouver	Homo sapiens
Acinetobacter_sp._ETR1	Acinetobacter_guillouiae_CCUG_2491	96.4166	Acinetobacter guillouiae	GCA_000705635.1	https://ftp.ncbi.nlm.nih.gov/genomes/all/GCA/000/705/635/GCA_000705635.1_etrbc	water	USA: California Institute of Technology	blank
Acinetobacter_calcoaceticus_EGD_AQ_BF14	Acinetobacter_pittii_ATCC_19004	96.4171	Acinetobacter pittii	GCA_001663695.1	https://ftp.ncbi.nlm.nih.gov/genomes/all/GCA/001/663/695/GCA_001663695.1_ASM166369v1	biofouled membrane	India: Sundarban	blank
Acinetobacter_pittii_AC1525	Acinetobacter_pittii_ATCC_19004	96.4221	Acinetobacter pittii	GCA_017161945.1	https://ftp.ncbi.nlm.nih.gov/genomes/all/GCA/017/161/945/GCA_017161945.1_ASM1716194v1	blood	Malaysia	Homo sapiens
Acinetobacter_pittii_A1254	Acinetobacter_pittii_ATCC_19004	96.4229	Acinetobacter pittii	GCA_011996285.1	https://ftp.ncbi.nlm.nih.gov/genomes/all/GCA/011/996/285/GCA_011996285.1_ASM1199628v1	blank	China:Zhejiang province	Homo sapiens
Acinetobacter_pittii_UKK-0546	Acinetobacter_pittii_ATCC_19004	96.4281	Acinetobacter pittii	GCA_001713675.1	https://ftp.ncbi.nlm.nih.gov/genomes/all/GCA/001/713/675/GCA_001713675.1_ASM171367v1	blank	Germany: Munich	Homo sapiens
Acinetobacter_lwoffii_FDAARGOS_552	Acinetobacter_lwoffii_CIP_64.10	96.4323	Acinetobacter lwoffii	GCA_009730095.1	https://ftp.ncbi.nlm.nih.gov/genomes/all/GCA/009/730/095/GCA_009730095.1_ASM973009v1	clinical isolate	USA: MN	Homo sapiens
Acinetobacter_pittii_AC1555	Acinetobacter_pittii_ATCC_19004	96.4354	Acinetobacter pittii	GCA_017162015.1	https://ftp.ncbi.nlm.nih.gov/genomes/all/GCA/017/162/015/GCA_017162015.1_ASM1716201v1	sputum	Malaysia	Homo sapiens
Acinetobacter_lwoffii_AMA23	Acinetobacter_lwoffii_CIP_64.10	96.4424	Acinetobacter lwoffii	GCA_009645785.1	https://ftp.ncbi.nlm.nih.gov/genomes/all/GCA/009/645/785/GCA_009645785.1_ASM964578v1	blank	blank	Homo sapiens
Acinetobacter_lwoffii_NIPH_715	Acinetobacter_lwoffii_CIP_64.10	96.4438	Acinetobacter lwoffii	GCA_000368165.1	https://ftp.ncbi.nlm.nih.gov/genomes/all/GCA/000/368/165/GCA_000368165.1_Acin_lwof_NIPH_715_V1	blank	blank	blank
Acinetobacter_sp._51m	Acinetobacter_lwoffii_CIP_64.10	96.4443	Acinetobacter lwoffii	GCA_001720685.1	https://ftp.ncbi.nlm.nih.gov/genomes/all/GCA/001/720/685/GCA_001720685.1_ASM172068v1	paleontological specimen from permafrost soil	Russia: Yakutsk	Mammuthus primigenius
Acinetobacter_pittii_ACIN00192	Acinetobacter_pittii_ATCC_19004	96.4475	Acinetobacter pittii	GCA_016502645.1	https://ftp.ncbi.nlm.nih.gov/genomes/all/GCA/016/502/645/GCA_016502645.1_ASM1650264v1	Tissue	USA: Pittsburgh, Pennsylvania	Homo sapiens
Acinetobacter_pittii_WCHAP100016	Acinetobacter_pittii_DSM_25618	96.4482	Acinetobacter pittii	GCA_004209445.1	https://ftp.ncbi.nlm.nih.gov/genomes/all/GCA/004/209/445/GCA_004209445.1_ASM420944v1	blank	China: Chengdu, Sichuan	Homo sapiens
Acinetobacter_pittii_XJ88	Acinetobacter_pittii_ATCC_19004	96.4523	Acinetobacter pittii	GCA_002863745.1	https://ftp.ncbi.nlm.nih.gov/genomes/all/GCA/002/863/745/GCA_002863745.1_ASM286374v1	sputum	China: Chengdu	Homo sapiens (female)
Acinetobacter_lwoffii_ZS207	Acinetobacter_lwoffii_CIP_64.10	96.469	Acinetobacter lwoffii	GCA_002119785.1	https://ftp.ncbi.nlm.nih.gov/genomes/all/GCA/002/119/785/GCA_002119785.1_ASM211978v1	microbial mats from Zloty Stok gold mine	Poland: lower Silesia	blank
Acinetobacter_guillouiae_NIPH_991	Acinetobacter_guillouiae_CIP_63.46	96.4691	Acinetobacter guillouiae	GCA_000368485.1	https://ftp.ncbi.nlm.nih.gov/genomes/all/GCA/000/368/485/GCA_000368485.1_Acin_guil_NIPH_991_V1	blank	blank	blank
Acinetobacter_seifertii_AS70	Acinetobacter_seifertii_NIPH_973	96.4747	Acinetobacter seifertii	GCA_014718955.1	https://ftp.ncbi.nlm.nih.gov/genomes/all/GCA/014/718/955/GCA_014718955.1_ASM1471895v1	blood	Taiwan	Homo sapiens
Acinetobacter_oleivorans_HW32	Acinetobacter_oleivorans_KCTC_23045	96.4757	Acinetobacter oleivorans	GCA_020179085.1	https://ftp.ncbi.nlm.nih.gov/genomes/all/GCA/020/179/085/GCA_020179085.1_ASM2017908v1	rhizosphere	Australia: Sydney	wheat
Acinetobacter_pittii_Aci00748	Acinetobacter_pittii_ATCC_19004	96.4832	Acinetobacter pittii	GCA_904887025.1	https://ftp.ncbi.nlm.nih.gov/genomes/all/GCA/904/887/025/GCA_904887025.1_Aci00748-181019_contigs_filtered.fa.gz	clinical material	blank	blank
Acinetobacter_pittii_AB17H194	Acinetobacter_pittii_ATCC_19004	96.4902	Acinetobacter pittii	GCA_008694085.1	https://ftp.ncbi.nlm.nih.gov/genomes/all/GCA/008/694/085/GCA_008694085.1_ASM869408v1	Wound secretion	China:Hebei province	Homo sapiens
Acinetobacter_pittii_VNMU_150	Acinetobacter_pittii_ATCC_19004	96.4921	Acinetobacter pittii	GCA_009887685.1	https://ftp.ncbi.nlm.nih.gov/genomes/all/GCA/009/887/685/GCA_009887685.1_ASM988768v1	wound	Ukraine	Homo sapiens
Acinetobacter_pittii_UKK-0145	Acinetobacter_pittii_ATCC_19004	96.5066	Acinetobacter pittii	GCA_001706035.1	https://ftp.ncbi.nlm.nih.gov/genomes/all/GCA/001/706/035/GCA_001706035.1_ASM170603v1	blank	Turkey: Bursa	Homo sapiens
Acinetobacter_lactucae_TG29425	Acinetobacter_lactucae_NRRL_B-41902	96.5398	Acinetobacter lactucae	GCA_003947665.1	https://ftp.ncbi.nlm.nih.gov/genomes/all/GCA/003/947/665/GCA_003947665.1_ASM394766v1	wound	USA: Arizona	Homo sapiens
Acinetobacter_seifertii_TUM15118	Acinetobacter_seifertii_NIPH_973	96.5447	Acinetobacter seifertii	GCA_008982895.1	https://ftp.ncbi.nlm.nih.gov/genomes/all/GCA/008/982/895/GCA_008982895.1_ASM898289v1	human sputum	Japan:Tokyo	Homo sapiens
Acinetobacter_pittii_WCHAP100021	Acinetobacter_pittii_ATCC_19004	96.5497	Acinetobacter pittii	GCA_004209395.1	https://ftp.ncbi.nlm.nih.gov/genomes/all/GCA/004/209/395/GCA_004209395.1_ASM420939v1	blank	China: Chengdu, Sichuan	Homo sapiens
Acinetobacter_sp._NIPH_899	Acinetobacter_variabilis_NIPH_2171	96.5499	Acinetobacter variabilis	GCA_000368385.1	https://ftp.ncbi.nlm.nih.gov/genomes/all/GCA/000/368/385/GCA_000368385.1_Acin_sp_NIPH_899_V1	blank	blank	blank
Acinetobacter_indicus_KCTC_42012	Acinetobacter_indicus_CIP_110367	96.5585	Acinetobacter indicus	GCA_002174105.1	https://ftp.ncbi.nlm.nih.gov/genomes/all/GCA/002/174/105/GCA_002174105.1_ASM217410v1	Lead-zinc ore mine	China: Meizhou	blank
Acinetobacter_pittii_ACIN00188	Acinetobacter_geminorum_J00019	96.5586	Acinetobacter geminorum	GCA_016508425.1	https://ftp.ncbi.nlm.nih.gov/genomes/all/GCA/016/508/425/GCA_016508425.1_ASM1650842v1	wound	USA: Pittsburgh, Pennsylvania	Homo sapiens
Acinetobacter_seifertii_AS73	Acinetobacter_seifertii_NIPH_973	96.5592	Acinetobacter seifertii	GCA_014718355.1	https://ftp.ncbi.nlm.nih.gov/genomes/all/GCA/014/718/355/GCA_014718355.1_ASM1471835v1	blood	Taiwan	Homo sapiens
Acinetobacter_sp._742879	Acinetobacter_pittii_ATCC_19004	96.5655	Acinetobacter pittii	GCA_000588535.1	https://ftp.ncbi.nlm.nih.gov/genomes/all/GCA/000/588/535/GCA_000588535.1_ASM58853v1	sputum	USA	Homo sapiens
Acinetobacter_seifertii_TUM15021	Acinetobacter_seifertii_NIPH_973	96.5656	Acinetobacter seifertii	GCA_008977525.1	https://ftp.ncbi.nlm.nih.gov/genomes/all/GCA/008/977/525/GCA_008977525.1_ASM897752v1	human sputum	Japan:Tokyo	Homo sapiens
Acinetobacter_pittii_ACIN00239	Acinetobacter_pittii_ATCC_19004	96.5687	Acinetobacter pittii	GCA_016502385.1	https://ftp.ncbi.nlm.nih.gov/genomes/all/GCA/016/502/385/GCA_016502385.1_ASM1650238v1	respiratory	USA: Pittsburgh, Pennsylvania	Homo sapiens
Acinetobacter_pittii_ABBL019	Acinetobacter_pittii_ATCC_19004	96.5697	Acinetobacter pittii	GCA_001432835.1	https://ftp.ncbi.nlm.nih.gov/genomes/all/GCA/001/432/835/GCA_001432835.1_ASM143283v1	Blood	USA: Chicago	Homo sapiens
Acinetobacter_pittii_KCJK1729	Acinetobacter_pittii_ATCC_19004	96.5734	Acinetobacter pittii	GCA_001707545.1	https://ftp.ncbi.nlm.nih.gov/genomes/all/GCA/001/707/545/GCA_001707545.1_ASM170754v1	feces	USA: Alachua County, Florida	Bos taurus
Acinetobacter_pittii_ARLG1865	Acinetobacter_pittii_ATCC_19004	96.5801	Acinetobacter pittii	GCA_002145325.1	https://ftp.ncbi.nlm.nih.gov/genomes/all/GCA/002/145/325/GCA_002145325.1_ASM214532v1	blank	blank	blank
Acinetobacter_pittii_AC1566	Acinetobacter_pittii_ATCC_19004	96.5937	Acinetobacter pittii	GCA_017162025.1	https://ftp.ncbi.nlm.nih.gov/genomes/all/GCA/017/162/025/GCA_017162025.1_ASM1716202v1	sputum	Malaysia	Homo sapiens
Acinetobacter_baumannii_269	Acinetobacter_pittii_ATCC_19004	96.5955	Acinetobacter pittii	GCA_000787015.1	https://ftp.ncbi.nlm.nih.gov/genomes/all/GCA/000/787/015/GCA_000787015.1_ASM78701v1	Mucoid Sputum	Malaysia	Homo sapiens
Acinetobacter_terrae_ANC_4279	Acinetobacter_terrae_ANC_4282	96.599	Acinetobacter terrae	GCA_013004355.1	https://ftp.ncbi.nlm.nih.gov/genomes/all/GCA/013/004/355/GCA_013004355.1_ASM1300435v1	Mud of a forest creek bank	Czech Republic: Krivoklatsko forestland	blank
Acinetobacter_pittii_AC1597	Acinetobacter_pittii_ATCC_19004	96.6014	Acinetobacter pittii	GCA_017161985.1	https://ftp.ncbi.nlm.nih.gov/genomes/all/GCA/017/161/985/GCA_017161985.1_ASM1716198v1	sputum	Malaysia	Homo sapiens
Acinetobacter_pittii_WCHAP100003	Acinetobacter_pittii_ATCC_19004	96.6021	Acinetobacter pittii	GCA_004209565.1	https://ftp.ncbi.nlm.nih.gov/genomes/all/GCA/004/209/565/GCA_004209565.1_ASM420956v1	blank	China: Chengdu, Sichuan	Homo sapiens
Acinetobacter_sp._1542444	Acinetobacter_pittii_DSM_25618	96.6079	Acinetobacter pittii	GCA_000581835.1	https://ftp.ncbi.nlm.nih.gov/genomes/all/GCA/000/581/835/GCA_000581835.1_ASM58183v1	perirectal	USA	Homo sapiens
Acinetobacter_lwoffii_VS15	Acinetobacter_lwoffii_CIP_64.10	96.6111	Acinetobacter lwoffii	GCA_019787645.1	https://ftp.ncbi.nlm.nih.gov/genomes/all/GCA/019/787/645/GCA_019787645.1_ASM1978764v1	permafrost, Kolyma lowland	Russia	blank
Acinetobacter_pittii_UBA4954	Acinetobacter_geminorum_J00019	96.6172	Acinetobacter geminorum	GCA_002397425.1	https://ftp.ncbi.nlm.nih.gov/genomes/all/GCA/002/397/425/GCA_002397425.1_ASM239742v1	mud	China: Luzhou	blank
Acinetobacter_pittii_ABC	Acinetobacter_pittii_ATCC_19004	96.6214	Acinetobacter pittii	GCA_001936495.1	https://ftp.ncbi.nlm.nih.gov/genomes/all/GCA/001/936/495/GCA_001936495.1_ASM193649v1	crude oil contaminated sediment collected from surface layer	India: Assam	blank
Acinetobacter_pittii_WCHAP100001	Acinetobacter_pittii_ATCC_19004	96.6249	Acinetobacter pittii	GCA_004209725.1	https://ftp.ncbi.nlm.nih.gov/genomes/all/GCA/004/209/725/GCA_004209725.1_ASM420972v1	blank	China: Chengdu, Sichuan	Homo sapiens
Acinetobacter_baumannii_146457	Acinetobacter_courvalinii_CCUG_67960	96.6315	Acinetobacter courvalinii	GCA_000580655.1	https://ftp.ncbi.nlm.nih.gov/genomes/all/GCA/000/580/655/GCA_000580655.1_ASM58065v1	perirectal	USA	Homo sapiens
Acinetobacter_sp._V2	Acinetobacter_oleivorans_DR1	96.6327	Acinetobacter oleivorans	GCA_001188385.1	https://ftp.ncbi.nlm.nih.gov/genomes/all/GCA/001/188/385/GCA_001188385.1_ASM118838v1	oil contaminated soil	South Africa: Amanzimtoti	blank
Acinetobacter_pittii_PHEA-2	Acinetobacter_pittii_ATCC_19004	96.633	Acinetobacter pittii	GCA_000191145.1	https://ftp.ncbi.nlm.nih.gov/genomes/all/GCA/000/191/145/GCA_000191145.1_ASM19114v1	blank	blank	blank
Acinetobacter_pittii_YMC2010_8_T346	Acinetobacter_pittii_ATCC_19004	96.6334	Acinetobacter pittii	GCA_002012285.1	https://ftp.ncbi.nlm.nih.gov/genomes/all/GCA/002/012/285/GCA_002012285.1_ASM201228v1	peritoneal catheter tip	South Korea: Seoul	Homo sapiens
Acinetobacter_pittii_AC1822	Acinetobacter_pittii_ATCC_19004	96.6344	Acinetobacter pittii	GCA_017162065.1	https://ftp.ncbi.nlm.nih.gov/genomes/all/GCA/017/162/065/GCA_017162065.1_ASM1716206v1	sputum	Malaysia	Homo sapiens
Acinetobacter_venetianus_WCHAV010037	Acinetobacter_venetianus_RAG-1	96.6378	Acinetobacter venetianus	GCA_004209405.1	https://ftp.ncbi.nlm.nih.gov/genomes/all/GCA/004/209/405/GCA_004209405.1_ASM420940v1	Sewage	China: Chengdu, Sichuan	blank
Acinetobacter_pittii_TG22174	Acinetobacter_pittii_ATCC_19004	96.6432	Acinetobacter pittii	GCA_003978965.1	https://ftp.ncbi.nlm.nih.gov/genomes/all/GCA/003/978/965/GCA_003978965.1_ASM397896v1	wound	USA: Arizona	Homo sapiens
Acinetobacter_indicus_SGAir0564	Acinetobacter_indicus_CIP_110367	96.6487	Acinetobacter indicus	GCA_002953575.2	https://ftp.ncbi.nlm.nih.gov/genomes/all/GCA/002/953/575/GCA_002953575.2_ASM295357v2	air	Singapore	blank
Acinetobacter_seifertii_TUM15357	Acinetobacter_seifertii_NIPH_973	96.6497	Acinetobacter seifertii	GCA_009000515.1	https://ftp.ncbi.nlm.nih.gov/genomes/all/GCA/009/000/515/GCA_009000515.1_ASM900051v1	human sputum	Japan:Tokyo	Homo sapiens
Acinetobacter_oleivorans_AC1583	Acinetobacter_oleivorans_KCTC_23045	96.658	Acinetobacter oleivorans	GCA_014876805.1	https://ftp.ncbi.nlm.nih.gov/genomes/all/GCA/014/876/805/GCA_014876805.1_ASM1487680v1	sputum	Malaysia	Homo sapiens
Acinetobacter_colistiniresistens_NIPH_1859	Acinetobacter_colistiniresistens_NIPH_2036	96.6612	Acinetobacter colistiniresistens	GCA_000369765.1	https://ftp.ncbi.nlm.nih.gov/genomes/all/GCA/000/369/765/GCA_000369765.1_Acin_sp_NIPH_1859_V1	blank	blank	blank
Acinetobacter_seifertii_KCJK7915	Acinetobacter_seifertii_NIPH_973	96.6618	Acinetobacter seifertii	GCA_003053365.1	https://ftp.ncbi.nlm.nih.gov/genomes/all/GCA/003/053/365/GCA_003053365.1_ASM305336v1	water	USA: Florida	blank
Acinetobacter_indicus_KM7	Acinetobacter_indicus_CIP_110367	96.6625	Acinetobacter indicus	GCA_000964095.1	https://ftp.ncbi.nlm.nih.gov/genomes/all/GCA/000/964/095/GCA_000964095.1_ASM96409v1	river in Endau-Rompin National Park	Malaysia: Johor	blank
Acinetobacter_pittii_NBRC_110504	Acinetobacter_pittii_ATCC_19004	96.6704	Acinetobacter pittii	GCA_000931895.1	https://ftp.ncbi.nlm.nih.gov/genomes/all/GCA/000/931/895/GCA_000931895.1_ASM93189v1	blank	blank	blank
Acinetobacter_sp._NIPH_1847	Acinetobacter_courvalinii_CCM_8635	96.6729	Acinetobacter courvalinii	GCA_000369605.1	https://ftp.ncbi.nlm.nih.gov/genomes/all/GCA/000/369/605/GCA_000369605.1_Acin_sp_NIPH_1847_V1	blank	blank	blank
Acinetobacter_pittii_ACIN00238	Acinetobacter_geminorum_J00019	96.6775	Acinetobacter geminorum	GCA_016502395.1	https://ftp.ncbi.nlm.nih.gov/genomes/all/GCA/016/502/395/GCA_016502395.1_ASM1650239v1	sputum	USA: Pittsburgh, Pennsylvania	Homo sapiens
Acinetobacter_sp._1000160	Acinetobacter_courvalinii_CCM_8635	96.6792	Acinetobacter courvalinii	GCA_000588715.2	https://ftp.ncbi.nlm.nih.gov/genomes/all/GCA/000/588/715/GCA_000588715.2_ASM58871v2	sputum	USA	Homo sapiens
Acinetobacter_seifertii_Ase176	Acinetobacter_seifertii_NIPH_973	96.6795	Acinetobacter seifertii	GCA_018863295.1	https://ftp.ncbi.nlm.nih.gov/genomes/all/GCA/018/863/295/GCA_018863295.1_ASM1886329v1	blood	USA: South Carolina	Homo sapiens
Acinetobacter_pittii_AP_882	Acinetobacter_pittii_ATCC_19004	96.6819	Acinetobacter pittii	GCA_001577285.1	https://ftp.ncbi.nlm.nih.gov/genomes/all/GCA/001/577/285/GCA_001577285.1_ASM157728v1	Wound Swab	Malaysia	Homo sapiens
Acinetobacter_venetianus_VE-C3	Acinetobacter_venetianus_RAG-1	96.6867	Acinetobacter venetianus	GCA_000308235.2	https://ftp.ncbi.nlm.nih.gov/genomes/all/GCA/000/308/235/GCA_000308235.2_ASM30823v2	seawater	Italy: Venice Lagoon	blank
Acinetobacter_parvus_CM11	Acinetobacter_modestus_CCM_8639	96.6902	Acinetobacter modestus	GCA_000962795.1	https://ftp.ncbi.nlm.nih.gov/genomes/all/GCA/000/962/795/GCA_000962795.1_ASM96279v1	intestine	France: Paris	Mice
Acinetobacter_sp._AC1-2	Acinetobacter_calcoaceticus_DSM_30006	96.6955	Acinetobacter calcoaceticus	GCA_016124155.1	https://ftp.ncbi.nlm.nih.gov/genomes/all/GCA/016/124/155/GCA_016124155.1_ASM1612415v1	Farmland Soil	United Kingdom: Fakenham	blank
Acinetobacter_pittii_FDAARGOS_1216	Acinetobacter_pittii_DSM_25618	96.7022	Acinetobacter pittii	GCA_016890065.1	https://ftp.ncbi.nlm.nih.gov/genomes/all/GCA/016/890/065/GCA_016890065.1_ASM1689006v1	blank	Germany: Braunschweig	blank
Acinetobacter_oleivorans_KCRI-35	Acinetobacter_oleivorans_DR1	96.7065	Acinetobacter oleivorans	GCA_900406785.1	https://ftp.ncbi.nlm.nih.gov/genomes/all/GCA/900/406/785/GCA_900406785.1_De_novo_assembly_of_KCRI_isolate_RDK37_35	blank	blank	blank
Acinetobacter_wuhouensis_WCHAW010062	Acinetobacter_wuhouensis_WCHA60	96.7069	Acinetobacter wuhouensis	GCA_002165345.2	https://ftp.ncbi.nlm.nih.gov/genomes/all/GCA/002/165/345/GCA_002165345.2_ASM216534v2	Sewage	China: Sichuan, Chengdu	blank
Acinetobacter_pittii_CR12-42	Acinetobacter_pittii_ATCC_19004	96.7075	Acinetobacter pittii	GCA_000800555.1	https://ftp.ncbi.nlm.nih.gov/genomes/all/GCA/000/800/555/GCA_000800555.1_APCR12-42	blank	Australia: Queensland	Homo sapiens
Acinetobacter_seifertii_TUM15285	Acinetobacter_seifertii_NIPH_973	96.7082	Acinetobacter seifertii	GCA_008994755.1	https://ftp.ncbi.nlm.nih.gov/genomes/all/GCA/008/994/755/GCA_008994755.1_ASM899475v1	human sputum	Japan:Tokyo	Homo sapiens
Acinetobacter_sp._VT_511	Acinetobacter_schindleri_CIP_107287	96.7107	Acinetobacter schindleri	GCA_001077515.1	https://ftp.ncbi.nlm.nih.gov/genomes/all/GCA/001/077/515/GCA_001077515.1_ASM107751v1	stomach	Russia	Homo sapiens
Acinetobacter_pittii_NBRC_110507	Acinetobacter_pittii_ATCC_19004	96.7127	Acinetobacter pittii	GCA_000949775.1	https://ftp.ncbi.nlm.nih.gov/genomes/all/GCA/000/949/775/GCA_000949775.1_ASM94977v1	blank	blank	blank
Acinetobacter_pittii_OCU_Ac5	Acinetobacter_pittii_ATCC_19004	96.713	Acinetobacter pittii	GCA_003569515.1	https://ftp.ncbi.nlm.nih.gov/genomes/all/GCA/003/569/515/GCA_003569515.1_ASM356951v1	blood culture of a hospitalized patient	Japan:Osaka	Homo sapiens
Acinetobacter_sp._ACNIH3	Acinetobacter_schindleri_CIP_107287	96.7153	Acinetobacter schindleri	GCA_002918965.1	https://ftp.ncbi.nlm.nih.gov/genomes/all/GCA/002/918/965/GCA_002918965.1_ASM291896v1	blank	USA	blank
Acinetobacter_pittii_SCsl25	Acinetobacter_pittii_ATCC_19004	96.7156	Acinetobacter pittii	GCA_009822185.1	https://ftp.ncbi.nlm.nih.gov/genomes/all/GCA/009/822/185/GCA_009822185.1_ASM982218v1	lung	blank	pig
Acinetobacter_seifertii_TUM15515	Acinetobacter_seifertii_NIPH_973	96.7158	Acinetobacter seifertii	GCA_009013175.1	https://ftp.ncbi.nlm.nih.gov/genomes/all/GCA/009/013/175/GCA_009013175.1_ASM901317v1	human blood	Japan:Kanagawa	Homo sapiens
Acinetobacter_sp._WCHAc060033	Acinetobacter_wuhouensis_WCHA60	96.7207	Acinetobacter wuhouensis	GCA_004209125.1	https://ftp.ncbi.nlm.nih.gov/genomes/all/GCA/004/209/125/GCA_004209125.1_ASM420912v1	Sewage	China: Chengdu, Sichuan	blank
Acinetobacter_lactucae_TUM15140	Acinetobacter_lactucae_NRRL_B-41902	96.7217	Acinetobacter lactucae	GCA_008984225.1	https://ftp.ncbi.nlm.nih.gov/genomes/all/GCA/008/984/225/GCA_008984225.1_ASM898422v1	human wound	Japan:Kanagawa	Homo sapiens
Acinetobacter_courvalinii_ACIN00158	Acinetobacter_courvalinii_CCUG_67960	96.7221	Acinetobacter courvalinii	GCA_016508605.1	https://ftp.ncbi.nlm.nih.gov/genomes/all/GCA/016/508/605/GCA_016508605.1_ASM1650860v1	sputum	USA: Pittsburgh, Pennsylvania	Homo sapiens
Acinetobacter_seifertii_AS6	Acinetobacter_seifertii_NIPH_973	96.7266	Acinetobacter seifertii	GCA_014723175.1	https://ftp.ncbi.nlm.nih.gov/genomes/all/GCA/014/723/175/GCA_014723175.1_ASM1472317v1	blood	Taiwan	Homo sapiens
Acinetobacter_pittii_TCM156	Acinetobacter_pittii_ATCC_19004	96.73	Acinetobacter pittii	GCA_001716955.1	https://ftp.ncbi.nlm.nih.gov/genomes/all/GCA/001/716/955/GCA_001716955.1_ASM171695v1	sputum	China: Hangzhou	Homo sapiens
Acinetobacter_seifertii_ACIN00148	Acinetobacter_seifertii_NIPH_973	96.7305	Acinetobacter seifertii	GCA_016503045.1	https://ftp.ncbi.nlm.nih.gov/genomes/all/GCA/016/503/045/GCA_016503045.1_ASM1650304v1	blank	USA: Pittsburgh, Pennsylvania	Homo sapiens
Acinetobacter_seifertii_TUM15427	Acinetobacter_seifertii_NIPH_973	96.7321	Acinetobacter seifertii	GCA_009005415.1	https://ftp.ncbi.nlm.nih.gov/genomes/all/GCA/009/005/415/GCA_009005415.1_ASM900541v1	human blood	Japan:Tochigi	Homo sapiens
Acinetobacter_pittii_NBRC_110509	Acinetobacter_pittii_ATCC_19004	96.7332	Acinetobacter pittii	GCA_000949795.1	https://ftp.ncbi.nlm.nih.gov/genomes/all/GCA/000/949/795/GCA_000949795.1_ASM94979v1	blank	blank	blank
Acinetobacter_pittii_PR320	Acinetobacter_pittii_DSM_25618	96.7364	Acinetobacter pittii	GCA_002137415.1	https://ftp.ncbi.nlm.nih.gov/genomes/all/GCA/002/137/415/GCA_002137415.1_ASM213741v1	blank	blank	blank
Acinetobacter_baumannii_Ab56	Acinetobacter_baumannii_DSM_30007	96.7376	Acinetobacter baumannii	GCA_002277485.1	https://ftp.ncbi.nlm.nih.gov/genomes/all/GCA/002/277/485/GCA_002277485.1_ASM227748v1	Vaginal secretion	China: Hangzhou	Homo sapiens
Acinetobacter_sp._aerobic_ED__Aci00763	Acinetobacter_courvalinii_CCUG_67960	96.7406	Acinetobacter courvalinii	GCA_904886855.1	https://ftp.ncbi.nlm.nih.gov/genomes/all/GCA/904/886/855/GCA_904886855.1_Aci00763-181019_contigs_filtered.fa.gz	clinical material	blank	blank
Acinetobacter_baumannii_1437282	Acinetobacter_courvalinii_CCM_8635	96.7444	Acinetobacter courvalinii	GCA_000580915.1	https://ftp.ncbi.nlm.nih.gov/genomes/all/GCA/000/580/915/GCA_000580915.1_ASM58091v1	perirectal	USA	Homo sapiens
Acinetobacter_oleivorans_KCJK7897	Acinetobacter_oleivorans_DR1	96.748	Acinetobacter oleivorans	GCA_003053305.1	https://ftp.ncbi.nlm.nih.gov/genomes/all/GCA/003/053/305/GCA_003053305.1_ASM305330v1	soil	USA: Florida	blank
Acinetobacter_seifertii_SAb133	Acinetobacter_seifertii_NIPH_973	96.7486	Acinetobacter seifertii	GCA_004378605.1	https://ftp.ncbi.nlm.nih.gov/genomes/all/GCA/004/378/605/GCA_004378605.1_ASM437860v1	soil	Brazil: Ribeirao Preto	blank
Acinetobacter_baumannii_PBIO721	Acinetobacter_oleivorans_DR1	96.7507	Acinetobacter oleivorans	GCA_902807055.1	https://ftp.ncbi.nlm.nih.gov/genomes/all/GCA/902/807/055/GCA_902807055.1_PBIO721	tertiary hospital, surgery	blank	blank
Acinetobacter_terrae_ANC_4280	Acinetobacter_terrae_ANC_4282	96.7526	Acinetobacter terrae	GCA_013004365.1	https://ftp.ncbi.nlm.nih.gov/genomes/all/GCA/013/004/365/GCA_013004365.1_ASM1300436v1	Mud of a forest creek bank	Czech Republic: Krivoklatsko forestland	blank
Acinetobacter_pittii_PR348	Acinetobacter_pittii_DSM_25618	96.7526	Acinetobacter pittii	GCA_002137855.1	https://ftp.ncbi.nlm.nih.gov/genomes/all/GCA/002/137/855/GCA_002137855.1_ASM213785v1	blank	blank	blank
Acinetobacter_genomosp._33YU_A362	Acinetobacter_seifertii_NIPH_973	96.757	Acinetobacter seifertii	GCA_001990735.1	https://ftp.ncbi.nlm.nih.gov/genomes/all/GCA/001/990/735/GCA_001990735.1_ASM199073v1	blank	China: Jilin	Homo sapiens
Acinetobacter_courvalinii_ACIN00250	Acinetobacter_courvalinii_CCM_8635	96.7572	Acinetobacter courvalinii	GCA_016502305.1	https://ftp.ncbi.nlm.nih.gov/genomes/all/GCA/016/502/305/GCA_016502305.1_ASM1650230v1	blood	USA: Pittsburgh, Pennsylvania	Homo sapiens
Acinetobacter_pittii_YMC2009_2_B2968	Acinetobacter_pittii_DSM_25618	96.7616	Acinetobacter pittii	GCA_003843755.1	https://ftp.ncbi.nlm.nih.gov/genomes/all/GCA/003/843/755/GCA_003843755.1_ASM384375v1	blood	South Korea: Seoul	Homo sapiens
Acinetobacter_pittii_AC1649	Acinetobacter_pittii_ATCC_19004	96.7638	Acinetobacter pittii	GCA_017161975.1	https://ftp.ncbi.nlm.nih.gov/genomes/all/GCA/017/161/975/GCA_017161975.1_ASM1716197v1	sputum	Malaysia	Homo sapiens
Acinetobacter_pittii_PR366	Acinetobacter_geminorum_J00019	96.7692	Acinetobacter geminorum	GCA_002137095.1	https://ftp.ncbi.nlm.nih.gov/genomes/all/GCA/002/137/095/GCA_002137095.1_ASM213709v1	blank	blank	blank
Acinetobacter_seifertii_AS4	Acinetobacter_seifertii_NIPH_973	96.7693	Acinetobacter seifertii	GCA_014723215.1	https://ftp.ncbi.nlm.nih.gov/genomes/all/GCA/014/723/215/GCA_014723215.1_ASM1472321v1	blood	Taiwan	Homo sapiens
Acinetobacter_pittii_TG41884	Acinetobacter_pittii_DSM_25618	96.7703	Acinetobacter pittii	GCA_003948075.1	https://ftp.ncbi.nlm.nih.gov/genomes/all/GCA/003/948/075/GCA_003948075.1_ASM394807v1	wound	USA: Arizona	Homo sapiens
Acinetobacter_sp._ZOR0008	Acinetobacter_pittii_DSM_25618	96.7711	Acinetobacter pittii	GCA_000800865.1	https://ftp.ncbi.nlm.nih.gov/genomes/all/GCA/000/800/865/GCA_000800865.1_ZOR0008.1	intestine	USA: Eugene, Oregon	Danio rerio
Acinetobacter_sp._ACNIH4	Acinetobacter_schindleri_CIP_107287	96.7712	Acinetobacter schindleri	GCA_002919885.1	https://ftp.ncbi.nlm.nih.gov/genomes/all/GCA/002/919/885/GCA_002919885.1_ASM291988v1	blank	USA	blank
Acinetobacter_pittii_HU_AC	Acinetobacter_pittii_DSM_25618	96.7718	Acinetobacter pittii	GCA_016811255.1	https://ftp.ncbi.nlm.nih.gov/genomes/all/GCA/016/811/255/GCA_016811255.1_ASM1681125v1	ground beef	USA: Washington, D.C.	blank
Acinetobacter_indicus_WMB-7	Acinetobacter_indicus_CIP_110367	96.7725	Acinetobacter indicus	GCA_009734145.1	https://ftp.ncbi.nlm.nih.gov/genomes/all/GCA/009/734/145/GCA_009734145.1_ASM973414v1	Fermentated grain	China:Beijing	blank
Acinetobacter_pittii_WCHAP100014	Acinetobacter_pittii_DSM_25618	96.7766	Acinetobacter pittii	GCA_004209435.1	https://ftp.ncbi.nlm.nih.gov/genomes/all/GCA/004/209/435/GCA_004209435.1_ASM420943v1	blank	China: Chengdu, Sichuan	Homo sapiens
Acinetobacter_pittii_TG31972	Acinetobacter_pittii_DSM_25618	96.7803	Acinetobacter pittii	GCA_003947955.1	https://ftp.ncbi.nlm.nih.gov/genomes/all/GCA/003/947/955/GCA_003947955.1_ASM394795v1	wound	USA: Arizona	Homo sapiens
Acinetobacter_pittii_TG41243	Acinetobacter_pittii_DSM_25618	96.7824	Acinetobacter pittii	GCA_003947995.1	https://ftp.ncbi.nlm.nih.gov/genomes/all/GCA/003/947/995/GCA_003947995.1_ASM394799v1	wound	USA: Arizona	Homo sapiens
Acinetobacter_pittii_TE2	Acinetobacter_pittii_ATCC_19004	96.7856	Acinetobacter pittii	GCA_000817365.1	https://ftp.ncbi.nlm.nih.gov/genomes/all/GCA/000/817/365/GCA_000817365.1_ASM81736v1	surface of healthy skin	India: New Delhi	Homo sapiens
Acinetobacter_pittii_UKK-0432	Acinetobacter_pittii_ATCC_19004	96.789	Acinetobacter pittii	GCA_001706155.1	https://ftp.ncbi.nlm.nih.gov/genomes/all/GCA/001/706/155/GCA_001706155.1_ASM170615v1	blank	Belgium: Verviers	Homo sapiens
Acinetobacter_sp._1295259	Acinetobacter_pittii_DSM_25618	96.7901	Acinetobacter pittii	GCA_000581095.1	https://ftp.ncbi.nlm.nih.gov/genomes/all/GCA/000/581/095/GCA_000581095.1_ASM58109v1	perirectal	USA	Homo sapiens
Acinetobacter_pittii_ABBL015	Acinetobacter_pittii_DSM_25618	96.7939	Acinetobacter pittii	GCA_001432435.1	https://ftp.ncbi.nlm.nih.gov/genomes/all/GCA/001/432/435/GCA_001432435.1_ASM143243v1	Blood	USA: Chicago	Homo sapiens
Acinetobacter_parvus_NIPH_1103	Acinetobacter_parvus_DSM_16617	96.7941	Acinetobacter parvus	GCA_000368005.1	https://ftp.ncbi.nlm.nih.gov/genomes/all/GCA/000/368/005/GCA_000368005.1_Acin_parv_NIPH_1103_V1	blank	blank	blank
Acinetobacter_seifertii_TUM15279	Acinetobacter_seifertii_NIPH_973	96.7948	Acinetobacter seifertii	GCA_008994495.1	https://ftp.ncbi.nlm.nih.gov/genomes/all/GCA/008/994/495/GCA_008994495.1_ASM899449v1	human sputum	Japan:Tokyo	Homo sapiens
Acinetobacter_wuhouensis_WCHAW060023	Acinetobacter_wuhouensis_WCHA60	96.7949	Acinetobacter wuhouensis	GCA_004209325.1	https://ftp.ncbi.nlm.nih.gov/genomes/all/GCA/004/209/325/GCA_004209325.1_ASM420932v1	Sewage	China: Chengdu, Sichuan	blank
Acinetobacter_pittii_IPK_TSA6.1	Acinetobacter_pittii_ATCC_19004	96.8019	Acinetobacter pittii	GCA_001698835.1	https://ftp.ncbi.nlm.nih.gov/genomes/all/GCA/001/698/835/GCA_001698835.1_ASM169883v1	surface area of a building with less than 200 occupants	South Korea	blank
Acinetobacter_seifertii_AS62	Acinetobacter_seifertii_NIPH_973	96.8051	Acinetobacter seifertii	GCA_014719435.1	https://ftp.ncbi.nlm.nih.gov/genomes/all/GCA/014/719/435/GCA_014719435.1_ASM1471943v1	blood	Taiwan	Homo sapiens
Acinetobacter_sp._WCHAc060025	Acinetobacter_wuhouensis_WCHA60	96.8078	Acinetobacter wuhouensis	GCA_004209355.1	https://ftp.ncbi.nlm.nih.gov/genomes/all/GCA/004/209/355/GCA_004209355.1_ASM420935v1	Sewage	China: Chengdu, Sichuan	blank
Acinetobacter_seifertii_AS34	Acinetobacter_seifertii_NIPH_973	96.8086	Acinetobacter seifertii	GCA_014722275.1	https://ftp.ncbi.nlm.nih.gov/genomes/all/GCA/014/722/275/GCA_014722275.1_ASM1472227v1	blood	Taiwan	Homo sapiens
Acinetobacter_pittii_WP2-W18-ESBL-11	Acinetobacter_pittii_ATCC_19004	96.8095	Acinetobacter pittii	GCA_014168695.1	https://ftp.ncbi.nlm.nih.gov/genomes/all/GCA/014/168/695/GCA_014168695.1_ASM1416869v1	wastewater treatment plant effluent	Japan:Tokyo	blank
Acinetobacter_pittii_TG41012	Acinetobacter_pittii_DSM_25618	96.8122	Acinetobacter pittii	GCA_003947705.1	https://ftp.ncbi.nlm.nih.gov/genomes/all/GCA/003/947/705/GCA_003947705.1_ASM394770v1	sputum	USA: Arizona	Homo sapiens
Acinetobacter_seifertii_AS59	Acinetobacter_seifertii_NIPH_973	96.8138	Acinetobacter seifertii	GCA_014720075.1	https://ftp.ncbi.nlm.nih.gov/genomes/all/GCA/014/720/075/GCA_014720075.1_ASM1472007v1	blood	Taiwan	Homo sapiens
Acinetobacter_schindleri_ACE	Acinetobacter_schindleri_CIP_107287	96.8175	Acinetobacter schindleri	GCA_001971565.1	https://ftp.ncbi.nlm.nih.gov/genomes/all/GCA/001/971/565/GCA_001971565.1_ASM197156v1	blank	Mexico: Cuernavaca Morelos	blank
Acinetobacter_pittii_TUM16165	Acinetobacter_pittii_DSM_25618	96.8177	Acinetobacter pittii	GCA_008581325.1	https://ftp.ncbi.nlm.nih.gov/genomes/all/GCA/008/581/325/GCA_008581325.1_ASM858132v1	human blood	Japan	Homo sapiens
Acinetobacter_pittii_ST220	Acinetobacter_pittii_ATCC_19004	96.8207	Acinetobacter pittii	GCA_003956065.1	https://ftp.ncbi.nlm.nih.gov/genomes/all/GCA/003/956/065/GCA_003956065.1_ASM395606v1	sputum	China: hefei	blank
Acinetobacter_seifertii_AS80	Acinetobacter_seifertii_NIPH_973	96.8251	Acinetobacter seifertii	GCA_014717695.1	https://ftp.ncbi.nlm.nih.gov/genomes/all/GCA/014/717/695/GCA_014717695.1_ASM1471769v1	blood	Taiwan	Homo sapiens
Acinetobacter_seifertii_AS58	Acinetobacter_seifertii_NIPH_973	96.8278	Acinetobacter seifertii	GCA_014720295.1	https://ftp.ncbi.nlm.nih.gov/genomes/all/GCA/014/720/295/GCA_014720295.1_ASM1472029v1	blood	Taiwan	Homo sapiens
Acinetobacter_seifertii_AS61	Acinetobacter_seifertii_NIPH_973	96.831	Acinetobacter seifertii	GCA_014719655.1	https://ftp.ncbi.nlm.nih.gov/genomes/all/GCA/014/719/655/GCA_014719655.1_ASM1471965v1	blood	Taiwan	Homo sapiens
Acinetobacter_sp._TG2027	Acinetobacter_pittii_DSM_25618	96.8347	Acinetobacter pittii	GCA_000302435.1	https://ftp.ncbi.nlm.nih.gov/genomes/all/GCA/000/302/435/GCA_000302435.1_ASM30243v1	wound	blank	Homo sapiens
Acinetobacter_oleivorans_ACIN00177	Acinetobacter_oleivorans_KCTC_23045	96.8368	Acinetobacter oleivorans	GCA_016502815.1	https://ftp.ncbi.nlm.nih.gov/genomes/all/GCA/016/502/815/GCA_016502815.1_ASM1650281v1	sputum	USA: Pittsburgh, Pennsylvania	Homo sapiens
Acinetobacter_pittii_TG29422	Acinetobacter_pittii_DSM_25618	96.8378	Acinetobacter pittii	GCA_003947915.1	https://ftp.ncbi.nlm.nih.gov/genomes/all/GCA/003/947/915/GCA_003947915.1_ASM394791v1	urine	USA: Arizona	Homo sapiens
Acinetobacter_pittii_HUMV-6483	Acinetobacter_pittii_DSM_25618	96.839	Acinetobacter pittii	GCA_002158945.1	https://ftp.ncbi.nlm.nih.gov/genomes/all/GCA/002/158/945/GCA_002158945.1_ASM215894v1	urine	Spain: Santander	Homo sapiens
Acinetobacter_seifertii_AS78	Acinetobacter_seifertii_NIPH_973	96.8429	Acinetobacter seifertii	GCA_014718155.1	https://ftp.ncbi.nlm.nih.gov/genomes/all/GCA/014/718/155/GCA_014718155.1_ASM1471815v1	blood	Taiwan	Homo sapiens
Acinetobacter_seifertii_AS25	Acinetobacter_seifertii_NIPH_973	96.8441	Acinetobacter seifertii	GCA_014723055.1	https://ftp.ncbi.nlm.nih.gov/genomes/all/GCA/014/723/055/GCA_014723055.1_ASM1472305v1	blood	Taiwan	Homo sapiens
Acinetobacter_pittii_ARLG1807	Acinetobacter_pittii_ATCC_19004	96.8466	Acinetobacter pittii	GCA_002143595.1	https://ftp.ncbi.nlm.nih.gov/genomes/all/GCA/002/143/595/GCA_002143595.1_ASM214359v1	blank	blank	blank
Acinetobacter_pittii_XM1570	Acinetobacter_pittii_DSM_25618	96.8472	Acinetobacter pittii	GCA_000341835.1	https://ftp.ncbi.nlm.nih.gov/genomes/all/GCA/000/341/835/GCA_000341835.1_ASM34183v1	expectorate sputum culture	China:Fujian Province	Homo sapiens
Acinetobacter_seifertii_AS51	Acinetobacter_seifertii_NIPH_973	96.8499	Acinetobacter seifertii	GCA_014720855.1	https://ftp.ncbi.nlm.nih.gov/genomes/all/GCA/014/720/855/GCA_014720855.1_ASM1472085v1	blood	Taiwan	Homo sapiens
Acinetobacter_pittii_TG91944	Acinetobacter_pittii_DSM_25618	96.8513	Acinetobacter pittii	GCA_003947755.1	https://ftp.ncbi.nlm.nih.gov/genomes/all/GCA/003/947/755/GCA_003947755.1_ASM394775v1	wound	USA: Arizona	Homo sapiens
Acinetobacter_seifertii_AS49	Acinetobacter_seifertii_NIPH_973	96.8514	Acinetobacter seifertii	GCA_014721075.1	https://ftp.ncbi.nlm.nih.gov/genomes/all/GCA/014/721/075/GCA_014721075.1_ASM1472107v1	blood	Taiwan	Homo sapiens
Acinetobacter_seifertii_S21	Acinetobacter_seifertii_NIPH_973	96.8533	Acinetobacter seifertii	GCA_016064815.1	https://ftp.ncbi.nlm.nih.gov/genomes/all/GCA/016/064/815/GCA_016064815.1_ASM1606481v1	soil	Malaysia	blank
Acinetobacter_pittii_WCHAP100002	Acinetobacter_pittii_DSM_25618	96.8537	Acinetobacter pittii	GCA_004209635.1	https://ftp.ncbi.nlm.nih.gov/genomes/all/GCA/004/209/635/GCA_004209635.1_ASM420963v1	blank	China: Chengdu, Sichuan	Homo sapiens
Acinetobacter_seifertii_AS63	Acinetobacter_seifertii_NIPH_973	96.8572	Acinetobacter seifertii	GCA_014719215.1	https://ftp.ncbi.nlm.nih.gov/genomes/all/GCA/014/719/215/GCA_014719215.1_ASM1471921v1	blood	Taiwan	Homo sapiens
Acinetobacter_pittii_ACIN00255	Acinetobacter_pittii_ATCC_19004	96.8593	Acinetobacter pittii	GCA_016506165.1	https://ftp.ncbi.nlm.nih.gov/genomes/all/GCA/016/506/165/GCA_016506165.1_ASM1650616v1	sputum	USA: Pittsburgh, Pennsylvania	Homo sapiens
Acinetobacter_seifertii_TUM15226	Acinetobacter_seifertii_NIPH_973	96.8593	Acinetobacter seifertii	GCA_008989545.1	https://ftp.ncbi.nlm.nih.gov/genomes/all/GCA/008/989/545/GCA_008989545.1_ASM898954v1	human sputum	Japan:Kanagawa	Homo sapiens
Acinetobacter_pittii_UBA2484	Acinetobacter_pittii_DSM_25618	96.8595	Acinetobacter pittii	GCA_002341885.1	https://ftp.ncbi.nlm.nih.gov/genomes/all/GCA/002/341/885/GCA_002341885.1_ASM234188v1	metal/plastic	USA:New York City	blank
Acinetobacter_seifertii_AS47	Acinetobacter_seifertii_NIPH_973	96.8597	Acinetobacter seifertii	GCA_014721415.1	https://ftp.ncbi.nlm.nih.gov/genomes/all/GCA/014/721/415/GCA_014721415.1_ASM1472141v1	blood	Taiwan	Homo sapiens
Acinetobacter_seifertii_AS31	Acinetobacter_seifertii_NIPH_973	96.8601	Acinetobacter seifertii	GCA_014722775.1	https://ftp.ncbi.nlm.nih.gov/genomes/all/GCA/014/722/775/GCA_014722775.1_ASM1472277v1	blood	Taiwan	Homo sapiens
Acinetobacter_seifertii_AS42	Acinetobacter_seifertii_NIPH_973	96.8629	Acinetobacter seifertii	GCA_014788525.1	https://ftp.ncbi.nlm.nih.gov/genomes/all/GCA/014/788/525/GCA_014788525.1_ASM1478852v1	blood	Taiwan	Homo sapiens
Acinetobacter_seifertii_AS71	Acinetobacter_seifertii_NIPH_973	96.8655	Acinetobacter seifertii	GCA_014718755.1	https://ftp.ncbi.nlm.nih.gov/genomes/all/GCA/014/718/755/GCA_014718755.1_ASM1471875v1	blood	Taiwan	Homo sapiens
Acinetobacter_schindleri_DRN	Acinetobacter_schindleri_CIP_107287	96.867	Acinetobacter schindleri	GCA_003069395.1	https://ftp.ncbi.nlm.nih.gov/genomes/all/GCA/003/069/395/GCA_003069395.1_ASM306939v1	Freshwater creek	USA: Pennsylvania	blank
Acinetobacter_genomosp._33YU_A354	Acinetobacter_seifertii_NIPH_973	96.8726	Acinetobacter seifertii	GCA_001990725.1	https://ftp.ncbi.nlm.nih.gov/genomes/all/GCA/001/990/725/GCA_001990725.1_ASM199072v1	sputum	China: Anhui	Homo sapiens
Acinetobacter_sp._TG27347	Acinetobacter_pittii_DSM_25618	96.8785	Acinetobacter pittii	GCA_000301635.1	https://ftp.ncbi.nlm.nih.gov/genomes/all/GCA/000/301/635/GCA_000301635.1_ASM30163v1	sputum	blank	Homo sapiens
Acinetobacter_pittii_St-19650-90	Acinetobacter_pittii_ATCC_19004	96.8849	Acinetobacter pittii	GCA_001706065.1	https://ftp.ncbi.nlm.nih.gov/genomes/all/GCA/001/706/065/GCA_001706065.1_ASM170606v1	blank	Germany: Cologne	Homo sapiens
Acinetobacter_terrae_ANC_4655	Acinetobacter_terrae_ANC_4282	96.8864	Acinetobacter terrae	GCA_002135195.1	https://ftp.ncbi.nlm.nih.gov/genomes/all/GCA/002/135/195/GCA_002135195.1_ASM213519v1	mud from a seasonal creek	Czech Republic: Krivoklatsko forestland	blank
Acinetobacter_sp._GG2	Acinetobacter_seifertii_NIPH_973	96.8865	Acinetobacter seifertii	GCA_000292385.1	https://ftp.ncbi.nlm.nih.gov/genomes/all/GCA/000/292/385/GCA_000292385.1_ASM29238v1	rhizosphere	Malaysia	blank
Acinetobacter_seifertii_AS41	Acinetobacter_seifertii_NIPH_973	96.888	Acinetobacter seifertii	GCA_014721575.1	https://ftp.ncbi.nlm.nih.gov/genomes/all/GCA/014/721/575/GCA_014721575.1_ASM1472157v1	blood	Taiwan	Homo sapiens
Acinetobacter_seifertii_AS33	Acinetobacter_seifertii_NIPH_973	96.8881	Acinetobacter seifertii	GCA_014722535.1	https://ftp.ncbi.nlm.nih.gov/genomes/all/GCA/014/722/535/GCA_014722535.1_ASM1472253v1	blood	Taiwan	Homo sapiens
Acinetobacter_sp._AG1	Acinetobacter_modestus_CCM_8639	96.8882	Acinetobacter modestus	GCA_001005525.1	https://ftp.ncbi.nlm.nih.gov/genomes/all/GCA/001/005/525/GCA_001005525.1_ASM100552v1	adult mosquito gut	USA: NM, Las Cruces	Anopheles gambiae strain G3
Acinetobacter_pittii_ACIN00256	Acinetobacter_pittii_ATCC_19004	96.8884	Acinetobacter pittii	GCA_016508345.1	https://ftp.ncbi.nlm.nih.gov/genomes/all/GCA/016/508/345/GCA_016508345.1_ASM1650834v1	urine	USA: Pittsburgh, Pennsylvania	Homo sapiens
Acinetobacter_seifertii_AS40	Acinetobacter_seifertii_NIPH_973	96.8904	Acinetobacter seifertii	GCA_014721815.1	https://ftp.ncbi.nlm.nih.gov/genomes/all/GCA/014/721/815/GCA_014721815.1_ASM1472181v1	blood	Taiwan	Homo sapiens
Acinetobacter_seifertii_AS11	Acinetobacter_seifertii_NIPH_973	96.8905	Acinetobacter seifertii	GCA_014723135.1	https://ftp.ncbi.nlm.nih.gov/genomes/all/GCA/014/723/135/GCA_014723135.1_ASM1472313v1	blood	Taiwan	Homo sapiens
Acinetobacter_pittii_DE0091	Acinetobacter_pittii_DSM_25618	96.8936	Acinetobacter pittii	GCA_007679545.1	https://ftp.ncbi.nlm.nih.gov/genomes/all/GCA/007/679/545/GCA_007679545.1_ASM767954v1	environmental	USA: North Carolina, Durham	blank
Acinetobacter_seifertii_AS72	Acinetobacter_seifertii_NIPH_973	96.8951	Acinetobacter seifertii	GCA_014718535.1	https://ftp.ncbi.nlm.nih.gov/genomes/all/GCA/014/718/535/GCA_014718535.1_ASM1471853v1	blood	Taiwan	Homo sapiens
Acinetobacter_pittii_FC8876	Acinetobacter_pittii_DSM_25618	96.8959	Acinetobacter pittii	GCA_001684275.1	https://ftp.ncbi.nlm.nih.gov/genomes/all/GCA/001/684/275/GCA_001684275.1_ASM168427v1	sputum	Brazil	Homo sapiens
Acinetobacter_seifertii_AS24	Acinetobacter_seifertii_NIPH_973	96.8967	Acinetobacter seifertii	GCA_014723075.1	https://ftp.ncbi.nlm.nih.gov/genomes/all/GCA/014/723/075/GCA_014723075.1_ASM1472307v1	blood	Taiwan	Homo sapiens
Acinetobacter_seifertii_AS52	Acinetobacter_seifertii_NIPH_973	96.8988	Acinetobacter seifertii	GCA_014720715.1	https://ftp.ncbi.nlm.nih.gov/genomes/all/GCA/014/720/715/GCA_014720715.1_ASM1472071v1	blood	Taiwan	Homo sapiens
Acinetobacter_pittii_WCHAP100017	Acinetobacter_pittii_ATCC_19004	96.9002	Acinetobacter pittii	GCA_004296295.1	https://ftp.ncbi.nlm.nih.gov/genomes/all/GCA/004/296/295/GCA_004296295.1_ASM429629v1	blank	China: Chengdu, Sichuan	Homo sapiens
Acinetobacter_seifertii_AS5	Acinetobacter_seifertii_NIPH_973	96.9006	Acinetobacter seifertii	GCA_014723195.1	https://ftp.ncbi.nlm.nih.gov/genomes/all/GCA/014/723/195/GCA_014723195.1_ASM1472319v1	blood	Taiwan	Homo sapiens
Acinetobacter_seifertii_AS53	Acinetobacter_seifertii_NIPH_973	96.9019	Acinetobacter seifertii	GCA_014720495.1	https://ftp.ncbi.nlm.nih.gov/genomes/all/GCA/014/720/495/GCA_014720495.1_ASM1472049v1	blood	Taiwan	Homo sapiens
Acinetobacter_wuhouensis_WCHAW060049	Acinetobacter_wuhouensis_WCHA60	96.9034	Acinetobacter wuhouensis	GCA_004209115.1	https://ftp.ncbi.nlm.nih.gov/genomes/all/GCA/004/209/115/GCA_004209115.1_ASM420911v1	Sewage	China: Chengdu, Sichuan	blank
Acinetobacter_seifertii_AS60	Acinetobacter_seifertii_NIPH_973	96.9053	Acinetobacter seifertii	GCA_014719835.1	https://ftp.ncbi.nlm.nih.gov/genomes/all/GCA/014/719/835/GCA_014719835.1_ASM1471983v1	blood	Taiwan	Homo sapiens
Acinetobacter_seifertii_AS28	Acinetobacter_seifertii_NIPH_973	96.9064	Acinetobacter seifertii	GCA_014723035.1	https://ftp.ncbi.nlm.nih.gov/genomes/all/GCA/014/723/035/GCA_014723035.1_ASM1472303v1	blood	Taiwan	Homo sapiens
Acinetobacter_seifertii_AS74	Acinetobacter_seifertii_NIPH_973	96.9071	Acinetobacter seifertii	GCA_014717935.1	https://ftp.ncbi.nlm.nih.gov/genomes/all/GCA/014/717/935/GCA_014717935.1_ASM1471793v1	blood	Taiwan	Homo sapiens
Acinetobacter_schindleri_S00243	Acinetobacter_schindleri_CIP_107287	96.9109	Acinetobacter schindleri	GCA_014204595.1	https://ftp.ncbi.nlm.nih.gov/genomes/all/GCA/014/204/595/GCA_014204595.1_ASM1420459v1	blank	USA: Texas	blank
Acinetobacter_seifertii_AS17	Acinetobacter_seifertii_NIPH_973	96.9131	Acinetobacter seifertii	GCA_014723095.1	https://ftp.ncbi.nlm.nih.gov/genomes/all/GCA/014/723/095/GCA_014723095.1_ASM1472309v1	blood	Taiwan	Homo sapiens
Acinetobacter_seifertii_TUM15120	Acinetobacter_seifertii_NIPH_973	96.9141	Acinetobacter seifertii	GCA_008983085.1	https://ftp.ncbi.nlm.nih.gov/genomes/all/GCA/008/983/085/GCA_008983085.1_ASM898308v1	human sputum	Japan:Tokyo	Homo sapiens
Acinetobacter_pittii_St-12537-91	Acinetobacter_pittii_DSM_25618	96.9158	Acinetobacter pittii	GCA_001706275.1	https://ftp.ncbi.nlm.nih.gov/genomes/all/GCA/001/706/275/GCA_001706275.1_ASM170627v1	blank	Germany: Cologne	Homo sapiens
Acinetobacter_sp._1294243	Acinetobacter_pittii_ATCC_19004	96.9215	Acinetobacter pittii	GCA_000588015.1	https://ftp.ncbi.nlm.nih.gov/genomes/all/GCA/000/588/015/GCA_000588015.1_ASM58801v1	sputum	USA	Homo sapiens
Acinetobacter_sp._Swhac1	Acinetobacter_towneri_DSM_14962	96.9239	Acinetobacter towneri	GCA_013390985.1	https://ftp.ncbi.nlm.nih.gov/genomes/all/GCA/013/390/985/GCA_013390985.1_ASM1339098v1	hospital sewage	China: Southwest	blank
Acinetobacter_sp._WCHAc010052	Acinetobacter_chinensis_WCHAc010005	96.9264	Acinetobacter chinensis	GCA_002165295.2	https://ftp.ncbi.nlm.nih.gov/genomes/all/GCA/002/165/295/GCA_002165295.2_ASM216529v2	Sewage	China: Sichuan, Chengdu	blank
Acinetobacter_sp._SAT183	Acinetobacter_venetianus_RAG-1	96.9267	Acinetobacter venetianus	GCA_002711945.1	https://ftp.ncbi.nlm.nih.gov/genomes/all/GCA/002/711/945/GCA_002711945.1_ASM271194v1	marine water sample	Atlantic Ocean: South Atlantic Ocean	blank
Acinetobacter_sp._ANC_3862	Acinetobacter_modestus_CCM_8639	96.9273	Acinetobacter modestus	GCA_000369565.1	https://ftp.ncbi.nlm.nih.gov/genomes/all/GCA/000/369/565/GCA_000369565.1_Acin_sp_ANC_3862_V1	blank	blank	blank
Acinetobacter_sp._NIPH_542	Acinetobacter_oleivorans_KCTC_23045	96.9307	Acinetobacter oleivorans	GCA_000369825.1	https://ftp.ncbi.nlm.nih.gov/genomes/all/GCA/000/369/825/GCA_000369825.1_Acin_sp_NIPH_542_V1	blank	blank	blank
Acinetobacter_seifertii_AS39	Acinetobacter_seifertii_NIPH_973	96.9311	Acinetobacter seifertii	GCA_014722015.1	https://ftp.ncbi.nlm.nih.gov/genomes/all/GCA/014/722/015/GCA_014722015.1_ASM1472201v1	blood	Taiwan	Homo sapiens
Acinetobacter_pittii_AP864	Acinetobacter_pittii_ATCC_19004	96.9317	Acinetobacter pittii	GCA_016535885.1	https://ftp.ncbi.nlm.nih.gov/genomes/all/GCA/016/535/885/GCA_016535885.1_ASM1653588v1	sputum	Thailand: Roi ed	Homo sapiens
Acinetobacter_lactucae_ANC_4052	Acinetobacter_lactucae_NRRL_B-41902	96.9321	Acinetobacter lactucae	GCA_000399705.1	https://ftp.ncbi.nlm.nih.gov/genomes/all/GCA/000/399/705/GCA_000399705.1_Acin_pitt_ANC_4052_V1	blank	blank	blank
Acinetobacter_pittii_LMO_Bin60	Acinetobacter_pittii_ATCC_19004	96.9322	Acinetobacter pittii	GCA_013530605.1	https://ftp.ncbi.nlm.nih.gov/genomes/all/GCA/013/530/605/GCA_013530605.1_ASM1353060v1	marine sediment; cultured under 152Mpa pressure	Pacific Ocean: Mariana trench	blank
Acinetobacter_oleivorans_ACIN00263	Acinetobacter_oleivorans_KCTC_23045	96.9329	Acinetobacter oleivorans	GCA_016506085.1	https://ftp.ncbi.nlm.nih.gov/genomes/all/GCA/016/506/085/GCA_016506085.1_ASM1650608v1	sputum	USA: Pittsburgh, Pennsylvania	Homo sapiens
Acinetobacter_towneri_A6	Acinetobacter_towneri_DSM_14962	96.9334	Acinetobacter towneri	GCA_018501125.1	https://ftp.ncbi.nlm.nih.gov/genomes/all/GCA/018/501/125/GCA_018501125.1_ASM1850112v1	hospital sewage	China	blank
Acinetobacter_pittii_AC15140	Acinetobacter_pittii_ATCC_19004	96.9364	Acinetobacter pittii	GCA_017162055.1	https://ftp.ncbi.nlm.nih.gov/genomes/all/GCA/017/162/055/GCA_017162055.1_ASM1716205v1	blood	Malaysia	Homo sapiens
Acinetobacter_pittii_St-12275-92	Acinetobacter_pittii_DSM_25618	96.94	Acinetobacter pittii	GCA_001706435.1	https://ftp.ncbi.nlm.nih.gov/genomes/all/GCA/001/706/435/GCA_001706435.1_ASM170643v1	blank	Germany: Cologne	Homo sapiens
Acinetobacter_oleivorans_AC1885	Acinetobacter_oleivorans_KCTC_23045	96.9402	Acinetobacter oleivorans	GCA_014876825.1	https://ftp.ncbi.nlm.nih.gov/genomes/all/GCA/014/876/825/GCA_014876825.1_ASM1487682v1	sputum	Malaysia	Homo sapiens
Acinetobacter_oleivorans_TUM15236	Acinetobacter_oleivorans_KCTC_23045	96.9412	Acinetobacter oleivorans	GCA_008990525.1	https://ftp.ncbi.nlm.nih.gov/genomes/all/GCA/008/990/525/GCA_008990525.1_ASM899052v1	human sputum	Japan:Kanagawa	Homo sapiens
Acinetobacter_seifertii_beef_318	Acinetobacter_seifertii_NIPH_973	96.9418	Acinetobacter seifertii	GCA_020113155.1	https://ftp.ncbi.nlm.nih.gov/genomes/all/GCA/020/113/155/GCA_020113155.1_ASM2011315v1	beef	South Korea: Daejeon	blank
Acinetobacter_seifertii_ACIN00245	Acinetobacter_seifertii_NIPH_973	96.9438	Acinetobacter seifertii	GCA_016506345.1	https://ftp.ncbi.nlm.nih.gov/genomes/all/GCA/016/506/345/GCA_016506345.1_ASM1650634v1	sputum	USA: Pittsburgh, Pennsylvania	Homo sapiens
Acinetobacter_pittii_WCHAP005046	Acinetobacter_pittii_DSM_25618	96.947	Acinetobacter pittii	GCA_003051965.2	https://ftp.ncbi.nlm.nih.gov/genomes/all/GCA/003/051/965/GCA_003051965.2_ASM305196v2	blank	China: Sichuan, Chengdu	Homo sapiens
Acinetobacter_pittii_UKK-0265	Acinetobacter_pittii_DSM_25618	96.9503	Acinetobacter pittii	GCA_001706125.1	https://ftp.ncbi.nlm.nih.gov/genomes/all/GCA/001/706/125/GCA_001706125.1_ASM170612v1	blank	Germany: Leverkusen	Homo sapiens
Acinetobacter_seifertii_S63-3	Acinetobacter_seifertii_NIPH_973	96.9518	Acinetobacter seifertii	GCA_018138965.1	https://ftp.ncbi.nlm.nih.gov/genomes/all/GCA/018/138/965/GCA_018138965.1_ASM1813896v1	Ailuropoda melanoleuca	China:ShangHai Zoo	blank
Acinetobacter_pittii_AP984	Acinetobacter_pittii_ATCC_19004	96.9535	Acinetobacter pittii	GCA_016623485.1	https://ftp.ncbi.nlm.nih.gov/genomes/all/GCA/016/623/485/GCA_016623485.1_ASM1662348v1	Ascitic Fluid	Thailand: Roi ed	Homo sapiens
Acinetobacter_pittii_NBRC_110506	Acinetobacter_pittii_ATCC_19004	96.9537	Acinetobacter pittii	GCA_000949755.1	https://ftp.ncbi.nlm.nih.gov/genomes/all/GCA/000/949/755/GCA_000949755.1_ASM94975v1	blank	blank	blank
Acinetobacter_schindleri_NIPH_900	Acinetobacter_schindleri_CIP_107287	96.9544	Acinetobacter schindleri	GCA_000368465.1	https://ftp.ncbi.nlm.nih.gov/genomes/all/GCA/000/368/465/GCA_000368465.1_Acin_schi_NIPH_900_V1	blank	blank	blank
Acinetobacter_pittii_WCHAP100023	Acinetobacter_pittii_DSM_25618	96.9583	Acinetobacter pittii	GCA_004209335.1	https://ftp.ncbi.nlm.nih.gov/genomes/all/GCA/004/209/335/GCA_004209335.1_ASM420933v1	blank	China: Chengdu, Sichuan	Homo sapiens
Acinetobacter_oleivorans_PT8	Acinetobacter_oleivorans_KCTC_23045	96.9625	Acinetobacter oleivorans	GCA_014854535.1	https://ftp.ncbi.nlm.nih.gov/genomes/all/GCA/014/854/535/GCA_014854535.1_ASM1485453v1	feces	USA: Whitewater Wisconsin	Chrysemys picta
Acinetobacter_sp._907131	Acinetobacter_pittii_ATCC_19004	96.9629	Acinetobacter pittii	GCA_000582195.1	https://ftp.ncbi.nlm.nih.gov/genomes/all/GCA/000/582/195/GCA_000582195.1_ASM58219v1	perirectal	USA	Homo sapiens
Acinetobacter_pittii_AS012594	Acinetobacter_pittii_DSM_25618	96.9665	Acinetobacter pittii	GCA_010608795.1	https://ftp.ncbi.nlm.nih.gov/genomes/all/GCA/010/608/795/GCA_010608795.1_ASM1060879v1	lung	USA	Homo sapiens
Acinetobacter_baumannii_UBA6296	Acinetobacter_seifertii_NIPH_973	96.9672	Acinetobacter seifertii	GCA_002439345.1	https://ftp.ncbi.nlm.nih.gov/genomes/all/GCA/002/439/345/GCA_002439345.1_ASM243934v1	metal	USA:New York City	blank
Acinetobacter_sp._YH01015	Acinetobacter_schindleri_CIP_107287	96.9685	Acinetobacter schindleri	GCA_013420325.1	https://ftp.ncbi.nlm.nih.gov/genomes/all/GCA/013/420/325/GCA_013420325.1_ASM1342032v1	feces	China: Jiangsu	pig
Acinetobacter_seifertii_MI30-324	Acinetobacter_seifertii_NIPH_973	96.9714	Acinetobacter seifertii	GCA_002794295.1	https://ftp.ncbi.nlm.nih.gov/genomes/all/GCA/002/794/295/GCA_002794295.1_ASM279429v1	Abscesse secretion	Bolivia: Cochabamba	Homo sapiens
Acinetobacter_seifertii_KCJK1723	Acinetobacter_seifertii_NIPH_973	96.9729	Acinetobacter seifertii	GCA_001707675.1	https://ftp.ncbi.nlm.nih.gov/genomes/all/GCA/001/707/675/GCA_001707675.1_ASM170767v1	feces	USA: Alachua County, Florida	Bos taurus
Acinetobacter_pittii_ABBL033	Acinetobacter_pittii_DSM_25618	96.9799	Acinetobacter pittii	GCA_001433125.1	https://ftp.ncbi.nlm.nih.gov/genomes/all/GCA/001/433/125/GCA_001433125.1_ASM143312v1	Blood	USA: Chicago	Homo sapiens
Acinetobacter_sp._Ac-14	Acinetobacter_pittii_DSM_25618	96.9934	Acinetobacter pittii	GCA_015224645.1	https://ftp.ncbi.nlm.nih.gov/genomes/all/GCA/015/224/645/GCA_015224645.1_ASM1522464v1	fruit tree rhizosphere soil	China: Guizhou	blank
Acinetobacter_schindleri_HZE23-1	Acinetobacter_schindleri_CIP_107287	96.9945	Acinetobacter schindleri	GCA_010918635.1	https://ftp.ncbi.nlm.nih.gov/genomes/all/GCA/010/918/635/GCA_010918635.1_ASM1091863v1	stool	China:Huizhou City, Guangdong Province	goose
Acinetobacter_schindleri_H3	Acinetobacter_schindleri_CIP_107287	96.9961	Acinetobacter schindleri	GCA_007833615.1	https://ftp.ncbi.nlm.nih.gov/genomes/all/GCA/007/833/615/GCA_007833615.1_ASM783361v1	the condensate water of the Shenzhou-9 spacecraft	China: Neimenggu	blank
Acinetobacter_seifertii_AS48	Acinetobacter_seifertii_NIPH_973	97.0098	Acinetobacter seifertii	GCA_014721215.1	https://ftp.ncbi.nlm.nih.gov/genomes/all/GCA/014/721/215/GCA_014721215.1_ASM1472121v1	blood	Taiwan	Homo sapiens
Acinetobacter_pittii_NBRC_110505	Acinetobacter_pittii_ATCC_19004	97.0122	Acinetobacter pittii	GCA_000949735.1	https://ftp.ncbi.nlm.nih.gov/genomes/all/GCA/000/949/735/GCA_000949735.1_ASM94973v1	blank	blank	blank
Acinetobacter_schindleri_SGAir0122	Acinetobacter_schindleri_CIP_107287	97.013	Acinetobacter schindleri	GCA_003072585.2	https://ftp.ncbi.nlm.nih.gov/genomes/all/GCA/003/072/585/GCA_003072585.2_ASM307258v2	air	Singapore	blank
Acinetobacter_pittii_B-3780	Acinetobacter_pittii_DSM_25618	97.0134	Acinetobacter pittii	GCA_018595725.1	https://ftp.ncbi.nlm.nih.gov/genomes/all/GCA/018/595/725/GCA_018595725.1_ASM1859572v1	industrial wastewater	Russia	blank
Acinetobacter_genomosp._33YU_A360	Acinetobacter_seifertii_NIPH_973	97.0144	Acinetobacter seifertii	GCA_001990765.1	https://ftp.ncbi.nlm.nih.gov/genomes/all/GCA/001/990/765/GCA_001990765.1_ASM199076v1	urine	China: Zhejiang	Homo sapiens
Acinetobacter_sp._883425	Acinetobacter_pittii_ATCC_19004	97.0166	Acinetobacter pittii	GCA_000588395.1	https://ftp.ncbi.nlm.nih.gov/genomes/all/GCA/000/588/395/GCA_000588395.1_ASM58839v1	sputum	USA	Homo sapiens
Acinetobacter_pittii_WCHAP100007	Acinetobacter_pittii_ATCC_19004	97.0202	Acinetobacter pittii	GCA_004209605.1	https://ftp.ncbi.nlm.nih.gov/genomes/all/GCA/004/209/605/GCA_004209605.1_ASM420960v1	blank	China: Chengdu, Sichuan	Homo sapiens
Acinetobacter_sp._BIGb0102	Acinetobacter_vivianii_CCM_8642	97.0227	Acinetobacter vivianii	GCA_003815055.1	https://ftp.ncbi.nlm.nih.gov/genomes/all/GCA/003/815/055/GCA_003815055.1_ASM381505v1	blank	blank	blank
Acinetobacter_pittii_AMA10	Acinetobacter_pittii_ATCC_19004	97.023	Acinetobacter pittii	GCA_009646055.1	https://ftp.ncbi.nlm.nih.gov/genomes/all/GCA/009/646/055/GCA_009646055.1_ASM964605v1	blank	blank	Homo sapiens
Acinetobacter_indicus_LUH5041	Acinetobacter_indicus_CIP_110367	97.0241	Acinetobacter indicus	GCA_002938685.1	https://ftp.ncbi.nlm.nih.gov/genomes/all/GCA/002/938/685/GCA_002938685.1_ASM293868v1	blank	Netherlands	Homo sapiens
Acinetobacter_pittii_WCHAP100010	Acinetobacter_pittii_ATCC_19004	97.0241	Acinetobacter pittii	GCA_004209555.1	https://ftp.ncbi.nlm.nih.gov/genomes/all/GCA/004/209/555/GCA_004209555.1_ASM420955v1	blank	China: Chengdu, Sichuan	Homo sapiens
Acinetobacter_sp._ACIN00229	Acinetobacter_oleivorans_KCTC_23045	97.0273	Acinetobacter oleivorans	GCA_016106645.1	https://ftp.ncbi.nlm.nih.gov/genomes/all/GCA/016/106/645/GCA_016106645.1_ASM1610664v1	Bronch	USA: Pittsburgh, Pennsylvania	Homo sapiens
Acinetobacter_sp._LCT-H3	Acinetobacter_schindleri_CIP_107287	97.0286	Acinetobacter schindleri	GCA_001866125.1	https://ftp.ncbi.nlm.nih.gov/genomes/all/GCA/001/866/125/GCA_001866125.1_ASM186612v1	Chinese spacecraft Shenzhou X	China: Beijing, Space Centre	blank
Acinetobacter_sp._NIPH_758	Acinetobacter_vivianii_CCM_8642	97.029	Acinetobacter vivianii	GCA_000368345.1	https://ftp.ncbi.nlm.nih.gov/genomes/all/GCA/000/368/345/GCA_000368345.1_Acin_sp_NIPH_758_V1	blank	blank	blank
Acinetobacter_sp._ACNIH2	Acinetobacter_tandoii_DSM_14970	97.0301	Acinetobacter tandoii	GCA_002934965.1	https://ftp.ncbi.nlm.nih.gov/genomes/all/GCA/002/934/965/GCA_002934965.1_ASM293496v1	blank	USA	blank
Acinetobacter_pittii_UKK-0554	Acinetobacter_pittii_DSM_25618	97.0324	Acinetobacter pittii	GCA_001706355.1	https://ftp.ncbi.nlm.nih.gov/genomes/all/GCA/001/706/355/GCA_001706355.1_ASM170635v1	blank	Germany: Bochum	Homo sapiens
Acinetobacter_pittii_ARLG1957	Acinetobacter_pittii_DSM_25618	97.0361	Acinetobacter pittii	GCA_002144875.1	https://ftp.ncbi.nlm.nih.gov/genomes/all/GCA/002/144/875/GCA_002144875.1_ASM214487v1	blank	blank	blank
Acinetobacter_seifertii_TUM15297	Acinetobacter_seifertii_NIPH_973	97.0371	Acinetobacter seifertii	GCA_008995635.1	https://ftp.ncbi.nlm.nih.gov/genomes/all/GCA/008/995/635/GCA_008995635.1_ASM899563v1	human sputum	Japan:Tokyo	Homo sapiens
Acinetobacter_pittii_4300STDY7045887	Acinetobacter_pittii_ATCC_19004	97.0385	Acinetobacter pittii	GCA_900496515.1	https://ftp.ncbi.nlm.nih.gov/genomes/all/GCA/900/496/515/GCA_900496515.1_24276_3_44	blank	blank	blank
Acinetobacter_sp._BEC1-S18-ESBL-01	Acinetobacter_pittii_ATCC_19004	97.0406	Acinetobacter pittii	GCA_014169935.1	https://ftp.ncbi.nlm.nih.gov/genomes/all/GCA/014/169/935/GCA_014169935.1_ASM1416993v1	oceanic water	Japan:Tokyo	blank
Acinetobacter_pittii_4300STDY7045719	Acinetobacter_pittii_DSM_25618	97.0428	Acinetobacter pittii	GCA_900495015.1	https://ftp.ncbi.nlm.nih.gov/genomes/all/GCA/900/495/015/GCA_900495015.1_24276_2_185	blank	blank	blank
Acinetobacter_vivianii_KJ-1	Acinetobacter_vivianii_CCM_8642	97.0433	Acinetobacter vivianii	GCA_020673335.1	https://ftp.ncbi.nlm.nih.gov/genomes/all/GCA/020/673/335/GCA_020673335.1_ASM2067333v1	petroleum contaminated soil	China: Shandong	blank
Acinetobacter_sp._NP28	Acinetobacter_venetianus_RAG-1	97.0447	Acinetobacter venetianus	GCA_002729655.1	https://ftp.ncbi.nlm.nih.gov/genomes/all/GCA/002/729/655/GCA_002729655.1_ASM272965v1	marine water sample	Pacific Ocean: North Pacific Ocean	blank
Acinetobacter_pittii_TG6411	Acinetobacter_pittii_ATCC_19004	97.0468	Acinetobacter pittii	GCA_000302375.1	https://ftp.ncbi.nlm.nih.gov/genomes/all/GCA/000/302/375/GCA_000302375.1_ASM30237v1	sputum	blank	Homo sapiens
Acinetobacter_sp._HA	Acinetobacter_schindleri_CIP_107287	97.047	Acinetobacter schindleri	GCA_000264725.1	https://ftp.ncbi.nlm.nih.gov/genomes/all/GCA/000/264/725/GCA_000264725.1_ASM26472v1	gut	blank	Helicoverpa armigera
Acinetobacter_baumannii_SDF	Acinetobacter_baumannii_ATCC_19606	97.0473	Acinetobacter baumannii	GCA_000069205.1	https://ftp.ncbi.nlm.nih.gov/genomes/all/GCA/000/069/205/GCA_000069205.1_ASM6920v1	blank	blank	blank
Acinetobacter_sp._CIP_102129	Acinetobacter_parvus_DSM_16617	97.0521	Acinetobacter parvus	GCA_000368305.1	https://ftp.ncbi.nlm.nih.gov/genomes/all/GCA/000/368/305/GCA_000368305.1_Acin_sp_CIP_102129_V1	blank	blank	blank
Acinetobacter_pittii_PR301	Acinetobacter_pittii_ATCC_19004	97.0542	Acinetobacter pittii	GCA_002136575.1	https://ftp.ncbi.nlm.nih.gov/genomes/all/GCA/002/136/575/GCA_002136575.1_ASM213657v1	blank	blank	blank
Acinetobacter_pittii_OCU_Ac12	Acinetobacter_pittii_DSM_25618	97.0544	Acinetobacter pittii	GCA_003569665.1	https://ftp.ncbi.nlm.nih.gov/genomes/all/GCA/003/569/665/GCA_003569665.1_ASM356966v1	blood culture of a hospitalized patient	Japan:Osaka	Homo sapiens
Acinetobacter_seifertii_AS9	Acinetobacter_seifertii_NIPH_973	97.0572	Acinetobacter seifertii	GCA_014723155.1	https://ftp.ncbi.nlm.nih.gov/genomes/all/GCA/014/723/155/GCA_014723155.1_ASM1472315v1	blood	Taiwan	Homo sapiens
Acinetobacter_oleivorans_TUM15571	Acinetobacter_oleivorans_KCTC_23045	97.0595	Acinetobacter oleivorans	GCA_009014195.1	https://ftp.ncbi.nlm.nih.gov/genomes/all/GCA/009/014/195/GCA_009014195.1_ASM901419v1	human blood	Japan:Tokyo	Homo sapiens
Acinetobacter_pittii_WCHAP100022	Acinetobacter_pittii_ATCC_19004	97.0674	Acinetobacter pittii	GCA_004209295.1	https://ftp.ncbi.nlm.nih.gov/genomes/all/GCA/004/209/295/GCA_004209295.1_ASM420929v1	blank	China: Chengdu, Sichuan	Homo sapiens
Acinetobacter_pittii_ARLG1789	Acinetobacter_pittii_DSM_25618	97.0689	Acinetobacter pittii	GCA_002143175.1	https://ftp.ncbi.nlm.nih.gov/genomes/all/GCA/002/143/175/GCA_002143175.1_ASM214317v1	blank	blank	blank
Acinetobacter_pittii_PR393	Acinetobacter_pittii_DSM_25618	97.0704	Acinetobacter pittii	GCA_002138235.1	https://ftp.ncbi.nlm.nih.gov/genomes/all/GCA/002/138/235/GCA_002138235.1_ASM213823v1	blank	blank	blank
Acinetobacter_terrae_ANC_4281	Acinetobacter_terrae_ANC_4282	97.0787	Acinetobacter terrae	GCA_004331165.1	https://ftp.ncbi.nlm.nih.gov/genomes/all/GCA/004/331/165/GCA_004331165.1_ASM433116v1	mud of a creek bank	Czech Republic: Krivoklatsko forestland	blank
Acinetobacter_sp._1264765	Acinetobacter_pittii_DSM_25618	97.0792	Acinetobacter pittii	GCA_000681815.1	https://ftp.ncbi.nlm.nih.gov/genomes/all/GCA/000/681/815/GCA_000681815.1_ASM68181v1	sputum	USA	Homo sapiens
Acinetobacter_seifertii_TUM15424	Acinetobacter_seifertii_NIPH_973	97.0804	Acinetobacter seifertii	GCA_009005375.1	https://ftp.ncbi.nlm.nih.gov/genomes/all/GCA/009/005/375/GCA_009005375.1_ASM900537v1	human blood	Japan:Tochigi	Homo sapiens
Acinetobacter_ursingii_Acinetobacter_ursingii_BgEED03	Acinetobacter_ursingii_DSM_16037	97.0808	Acinetobacter ursingii	GCA_901873655.1	https://ftp.ncbi.nlm.nih.gov/genomes/all/GCA/901/873/655/GCA_901873655.1_Acinetobacter_ursingii_BgEED03	blank	blank	blank
Acinetobacter_sp._DUT-2	Acinetobacter_pittii_ATCC_19004	97.0826	Acinetobacter pittii	GCA_001581975.1	https://ftp.ncbi.nlm.nih.gov/genomes/all/GCA/001/581/975/GCA_001581975.1_ASM158197v1	marine sediments	China: Panjin, Liaodong Bay	blank
Acinetobacter_pittii_St-17942-91	Acinetobacter_pittii_DSM_25618	97.0894	Acinetobacter pittii	GCA_001706525.1	https://ftp.ncbi.nlm.nih.gov/genomes/all/GCA/001/706/525/GCA_001706525.1_ASM170652v1	blank	Germany: Cologne	Homo sapiens
Acinetobacter_pittii_TG31979	Acinetobacter_pittii_ATCC_19004	97.0992	Acinetobacter pittii	GCA_003947975.1	https://ftp.ncbi.nlm.nih.gov/genomes/all/GCA/003/947/975/GCA_003947975.1_ASM394797v1	wound	USA: Arizona	Homo sapiens
Acinetobacter_pittii_TG91976	Acinetobacter_pittii_DSM_25618	97.0996	Acinetobacter pittii	GCA_003948335.1	https://ftp.ncbi.nlm.nih.gov/genomes/all/GCA/003/948/335/GCA_003948335.1_ASM394833v1	throat	USA: Arizona	Homo sapiens
Acinetobacter_pittii_UNC434CL69Tsu2S25	Acinetobacter_pittii_ATCC_19004	97.1003	Acinetobacter pittii	GCA_900110525.1	https://ftp.ncbi.nlm.nih.gov/genomes/all/GCA/900/110/525/GCA_900110525.1_IMG-taxon_2593339129_annotated_assembly	blank	blank	blank
Acinetobacter_pittii_ABBL042	Acinetobacter_pittii_DSM_25618	97.1034	Acinetobacter pittii	GCA_001433185.1	https://ftp.ncbi.nlm.nih.gov/genomes/all/GCA/001/433/185/GCA_001433185.1_ASM143318v1	Blood	USA: Chicago	Homo sapiens
Acinetobacter_pittii_ANC_3678	Acinetobacter_pittii_ATCC_19004	97.1034	Acinetobacter pittii	GCA_000369025.1	https://ftp.ncbi.nlm.nih.gov/genomes/all/GCA/000/369/025/GCA_000369025.1_Acin_pitt_ANC_3678_V1	blank	blank	blank
Acinetobacter_pittii_332_ABCC	Acinetobacter_pittii_DSM_25618	97.1036	Acinetobacter pittii	GCA_001056355.1	https://ftp.ncbi.nlm.nih.gov/genomes/all/GCA/001/056/355/GCA_001056355.1_ASM105635v1	blank	USA: WA	Homo sapiens
Acinetobacter_pittii_ABBL024	Acinetobacter_pittii_DSM_25618	97.1128	Acinetobacter pittii	GCA_001432635.1	https://ftp.ncbi.nlm.nih.gov/genomes/all/GCA/001/432/635/GCA_001432635.1_ASM143263v1	Blood	USA: Chicago	Homo sapiens
Acinetobacter_pittii_TCM292	Acinetobacter_pittii_ATCC_19004	97.1132	Acinetobacter pittii	GCA_001716935.1	https://ftp.ncbi.nlm.nih.gov/genomes/all/GCA/001/716/935/GCA_001716935.1_ASM171693v1	blood	China: Hangzhou	Homo sapiens
Acinetobacter_schindleri_HZE33-1	Acinetobacter_schindleri_CIP_107287	97.1162	Acinetobacter schindleri	GCA_010919095.1	https://ftp.ncbi.nlm.nih.gov/genomes/all/GCA/010/919/095/GCA_010919095.1_ASM1091909v1	stool	China:Huizhou City, Guangdong Province	goose
Acinetobacter_seifertii_UBA3035	Acinetobacter_seifertii_NIPH_973	97.1163	Acinetobacter seifertii	GCA_002367535.1	https://ftp.ncbi.nlm.nih.gov/genomes/all/GCA/002/367/535/GCA_002367535.1_ASM236753v1	wood	USA:New York City	blank
Acinetobacter_calcoaceticus_NIPH_13	Acinetobacter_calcoaceticus_DSM_30006	97.1201	Acinetobacter calcoaceticus	GCA_000367865.1	https://ftp.ncbi.nlm.nih.gov/genomes/all/GCA/000/367/865/GCA_000367865.1_Acin_calc_NIPH_13_V1	blank	blank	blank
Acinetobacter_seifertii_AS23	Acinetobacter_seifertii_NIPH_973	97.1212	Acinetobacter seifertii	GCA_014723115.1	https://ftp.ncbi.nlm.nih.gov/genomes/all/GCA/014/723/115/GCA_014723115.1_ASM1472311v1	blood	Taiwan	Homo sapiens
Acinetobacter_indicus_XG03	Acinetobacter_indicus_CIP_110367	97.1232	Acinetobacter indicus	GCA_009914395.1	https://ftp.ncbi.nlm.nih.gov/genomes/all/GCA/009/914/395/GCA_009914395.1_ASM991439v1	cow feces	China: Jiangsu	cow
Acinetobacter_pittii_ACIN00195	Acinetobacter_pittii_DSM_25618	97.1241	Acinetobacter pittii	GCA_016502655.1	https://ftp.ncbi.nlm.nih.gov/genomes/all/GCA/016/502/655/GCA_016502655.1_ASM1650265v1	blood	USA: Pittsburgh, Pennsylvania	Homo sapiens
Acinetobacter_pittii_TG41247	Acinetobacter_pittii_DSM_25618	97.1243	Acinetobacter pittii	GCA_003948045.1	https://ftp.ncbi.nlm.nih.gov/genomes/all/GCA/003/948/045/GCA_003948045.1_ASM394804v1	eye	USA: Arizona	Homo sapiens
Acinetobacter_pittii_ABBL046	Acinetobacter_pittii_DSM_25618	97.1277	Acinetobacter pittii	GCA_001433295.1	https://ftp.ncbi.nlm.nih.gov/genomes/all/GCA/001/433/295/GCA_001433295.1_ASM143329v1	Blood	USA: Chicago	Homo sapiens
Acinetobacter_pittii_ARLG1764	Acinetobacter_pittii_DSM_25618	97.1308	Acinetobacter pittii	GCA_002144015.1	https://ftp.ncbi.nlm.nih.gov/genomes/all/GCA/002/144/015/GCA_002144015.1_ASM214401v1	blank	blank	blank
Acinetobacter_pittii_MGYG-HGUT-02346	Acinetobacter_pittii_DSM_25618	97.1316	Acinetobacter pittii	GCA_902386175.1	https://ftp.ncbi.nlm.nih.gov/genomes/all/GCA/902/386/175/GCA_902386175.1_UHGG_MGYG-HGUT-02346	human gut	blank	blank
Acinetobacter_sp._1245249	Acinetobacter_pittii_DSM_25618	97.1316	Acinetobacter pittii	GCA_000584575.1	https://ftp.ncbi.nlm.nih.gov/genomes/all/GCA/000/584/575/GCA_000584575.1_ASM58457v1	perirectal	USA	Homo sapiens
Acinetobacter_pittii_TG41017	Acinetobacter_pittii_DSM_25618	97.1321	Acinetobacter pittii	GCA_003947725.1	https://ftp.ncbi.nlm.nih.gov/genomes/all/GCA/003/947/725/GCA_003947725.1_ASM394772v1	eye	USA: Arizona	Homo sapiens
Acinetobacter_indicus_IHIT27599	Acinetobacter_indicus_CIP_110367	97.1332	Acinetobacter indicus	GCA_001922645.1	https://ftp.ncbi.nlm.nih.gov/genomes/all/GCA/001/922/645/GCA_001922645.1_ASM192264v1	nose	Germany	calf
Acinetobacter_sp._BS1	Acinetobacter_pittii_ATCC_19004	97.1369	Acinetobacter pittii	GCA_002251565.1	https://ftp.ncbi.nlm.nih.gov/genomes/all/GCA/002/251/565/GCA_002251565.1_ASM225156v1	black soil	China: Changbai Mountain	blank
Acinetobacter_seifertii_AS79	Acinetobacter_seifertii_NIPH_973	97.1406	Acinetobacter seifertii	GCA_014717515.1	https://ftp.ncbi.nlm.nih.gov/genomes/all/GCA/014/717/515/GCA_014717515.1_ASM1471751v1	blood	Taiwan	Homo sapiens
Acinetobacter_sp._SM1B	Acinetobacter_schindleri_CIP_107287	97.15	Acinetobacter schindleri	GCA_003289665.1	https://ftp.ncbi.nlm.nih.gov/genomes/all/GCA/003/289/665/GCA_003289665.1_ASM328966v1	Isolated as endophyte from capsules of field grown Papaver somniferum plants of cv. Sampada	India	Papaver somniferum
Acinetobacter_sp._1578804	Acinetobacter_pittii_DSM_25618	97.1525	Acinetobacter pittii	GCA_000582075.1	https://ftp.ncbi.nlm.nih.gov/genomes/all/GCA/000/582/075/GCA_000582075.1_ASM58207v1	perirectal	USA	Homo sapiens
Acinetobacter_sp._1564232	Acinetobacter_pittii_DSM_25618	97.1576	Acinetobacter pittii	GCA_000584815.2	https://ftp.ncbi.nlm.nih.gov/genomes/all/GCA/000/584/815/GCA_000584815.2_ASM58481v2	perirectal	USA	Homo sapiens
Acinetobacter_haemolyticus_AN20	Acinetobacter_haemolyticus_MTCC_9819	97.1599	Acinetobacter haemolyticus	GCA_009899725.1	https://ftp.ncbi.nlm.nih.gov/genomes/all/GCA/009/899/725/GCA_009899725.1_ASM989972v1	Peritoneal dialysis fluid	Mexico: Puebla	Homo sapiens
Acinetobacter_haemolyticus_AN34	Acinetobacter_haemolyticus_MTCC_9819	97.1606	Acinetobacter haemolyticus	GCA_009899745.1	https://ftp.ncbi.nlm.nih.gov/genomes/all/GCA/009/899/745/GCA_009899745.1_ASM989974v1	Peritoneal dialysis fluid	Mexico: Puebla	Homo sapiens
Acinetobacter_sp._YH16053	Acinetobacter_towneri_DSM_14962	97.1619	Acinetobacter towneri	GCA_013417035.1	https://ftp.ncbi.nlm.nih.gov/genomes/all/GCA/013/417/035/GCA_013417035.1_ASM1341703v1	feces	China: Hunan	pig
Acinetobacter_ursingii_TUM15525	Acinetobacter_ursingii_DSM_16037	97.1643	Acinetobacter ursingii	GCA_009013375.1	https://ftp.ncbi.nlm.nih.gov/genomes/all/GCA/009/013/375/GCA_009013375.1_ASM901337v1	human blood	Japan:Kanagawa	Homo sapiens
Acinetobacter_venetianus_SZUA-1530	Acinetobacter_venetianus_RAG-1	97.1654	Acinetobacter venetianus	GCA_015661595.1	https://ftp.ncbi.nlm.nih.gov/genomes/all/GCA/015/661/595/GCA_015661595.1_ASM1566159v1	Mid-Cayman Rise Vent Fluids	Atlantic Ocean: Mid Cayman Rise	blank
Acinetobacter_pittii_Colony142	Acinetobacter_pittii_DSM_25618	97.1663	Acinetobacter pittii	GCA_019264765.1	https://ftp.ncbi.nlm.nih.gov/genomes/all/GCA/019/264/765/GCA_019264765.1_ASM1926476v1	other	Thailand	blank
Acinetobacter_indicus_IHIT27630	Acinetobacter_indicus_CIP_110367	97.1703	Acinetobacter indicus	GCA_001922625.1	https://ftp.ncbi.nlm.nih.gov/genomes/all/GCA/001/922/625/GCA_001922625.1_ASM192262v1	nose	Germany	calf
Acinetobacter_indicus_IHIT31227	Acinetobacter_indicus_CIP_110367	97.1704	Acinetobacter indicus	GCA_002938805.1	https://ftp.ncbi.nlm.nih.gov/genomes/all/GCA/002/938/805/GCA_002938805.1_ASM293880v1	blank	Germany	cattle
Acinetobacter_schindleri_HZE30-1	Acinetobacter_schindleri_CIP_107287	97.1733	Acinetobacter schindleri	GCA_010918895.1	https://ftp.ncbi.nlm.nih.gov/genomes/all/GCA/010/918/895/GCA_010918895.1_ASM1091889v1	stool	China:Huizhou City, Guangdong Province	goose
Acinetobacter_sp._NRRL_B-65365	Acinetobacter_vivianii_CCM_8642	97.177	Acinetobacter vivianii	GCA_001605865.1	https://ftp.ncbi.nlm.nih.gov/genomes/all/GCA/001/605/865/GCA_001605865.1_ASM160586v1	blank	USA: Ft Pierce, Florida, citrus grove	Diaphorina citri
Acinetobacter_haemolyticus_XH900	Acinetobacter_haemolyticus_MTCC_9819	97.181	Acinetobacter haemolyticus	GCA_002813065.1	https://ftp.ncbi.nlm.nih.gov/genomes/all/GCA/002/813/065/GCA_002813065.1_ASM281306v1	blood	China: Zhejiang	Homo sapiens
Acinetobacter_haemolyticus_TJS01	Acinetobacter_haemolyticus_MTCC_9819	97.1841	Acinetobacter haemolyticus	GCA_001932555.1	https://ftp.ncbi.nlm.nih.gov/genomes/all/GCA/001/932/555/GCA_001932555.1_ASM193255v1	blank	China: Tianjin	Homo sapiens
Acinetobacter_haemolyticus_AN60	Acinetobacter_haemolyticus_MTCC_9819	97.1852	Acinetobacter haemolyticus	GCA_009899635.1	https://ftp.ncbi.nlm.nih.gov/genomes/all/GCA/009/899/635/GCA_009899635.1_ASM989963v1	Peritoneal dialysis fluid	Mexico: Puebla	Homo sapiens
Acinetobacter_indicus_XG01	Acinetobacter_indicus_CIP_110367	97.1856	Acinetobacter indicus	GCA_009914375.1	https://ftp.ncbi.nlm.nih.gov/genomes/all/GCA/009/914/375/GCA_009914375.1_ASM991437v1	cow feces	China: Jiangsu	Cows
Acinetobacter_seifertii_FDAARGOS_1400	Acinetobacter_seifertii_NIPH_973	97.187	Acinetobacter seifertii	GCA_019048405.1	https://ftp.ncbi.nlm.nih.gov/genomes/all/GCA/019/048/405/GCA_019048405.1_ASM1904840v1	blank	Germany: Braunschweig	blank
Acinetobacter_bereziniae_TUM15358	Acinetobacter_bereziniae_LMG_1003	97.1879	Acinetobacter bereziniae	GCA_009000535.1	https://ftp.ncbi.nlm.nih.gov/genomes/all/GCA/009/000/535/GCA_009000535.1_ASM900053v1	human sputum	Japan:Tokyo	Homo sapiens
Acinetobacter_sp._FDAARGOS_515	Acinetobacter_ursingii_DSM_16037	97.1887	Acinetobacter ursingii	GCA_003938865.1	https://ftp.ncbi.nlm.nih.gov/genomes/all/GCA/003/938/865/GCA_003938865.1_ASM393886v1	Endotracheal aspirate	USA: DC	Homo sapiens
Acinetobacter_ursingii_421_ABAU	Acinetobacter_ursingii_CIP_107286	97.19	Acinetobacter ursingii	GCA_001056675.1	https://ftp.ncbi.nlm.nih.gov/genomes/all/GCA/001/056/675/GCA_001056675.1_ASM105667v1	blank	USA: WA	Homo sapiens
Acinetobacter_sp._SWBY1	Acinetobacter_towneri_DSM_14962	97.1931	Acinetobacter towneri	GCA_002946595.1	https://ftp.ncbi.nlm.nih.gov/genomes/all/GCA/002/946/595/GCA_002946595.1_ASM294659v1	hospital sewage	China	blank
Acinetobacter_ursingii_TUM15519	Acinetobacter_ursingii_DSM_16037	97.1987	Acinetobacter ursingii	GCA_009013255.1	https://ftp.ncbi.nlm.nih.gov/genomes/all/GCA/009/013/255/GCA_009013255.1_ASM901325v1	human blood	Japan:Kanagawa	Homo sapiens
Acinetobacter_indicus_IHIT32860	Acinetobacter_indicus_CIP_110367	97.2042	Acinetobacter indicus	GCA_002938625.1	https://ftp.ncbi.nlm.nih.gov/genomes/all/GCA/002/938/625/GCA_002938625.1_ASM293862v1	blank	Germany	cattle
Acinetobacter_indicus_IHIT31230	Acinetobacter_indicus_CIP_110367	97.2119	Acinetobacter indicus	GCA_002938815.1	https://ftp.ncbi.nlm.nih.gov/genomes/all/GCA/002/938/815/GCA_002938815.1_ASM293881v1	blank	Germany	cattle
Acinetobacter_indicus_AI18	Acinetobacter_indicus_CIP_110367	97.2189	Acinetobacter indicus	GCA_012366735.1	https://ftp.ncbi.nlm.nih.gov/genomes/all/GCA/012/366/735/GCA_012366735.1_ASM1236673v1	cow	China	blank
Acinetobacter_ursingii_TUM15491	Acinetobacter_ursingii_DSM_16037	97.2203	Acinetobacter ursingii	GCA_009011615.1	https://ftp.ncbi.nlm.nih.gov/genomes/all/GCA/009/011/615/GCA_009011615.1_ASM901161v1	human blood	Japan:Tochigi	Homo sapiens
Acinetobacter_indicus_IHIT31216	Acinetobacter_indicus_CIP_110367	97.2216	Acinetobacter indicus	GCA_002938695.1	https://ftp.ncbi.nlm.nih.gov/genomes/all/GCA/002/938/695/GCA_002938695.1_ASM293869v1	blank	Germany	cattle
Acinetobacter_ursingii_TUM15408	Acinetobacter_ursingii_DSM_16037	97.2239	Acinetobacter ursingii	GCA_009004075.1	https://ftp.ncbi.nlm.nih.gov/genomes/all/GCA/009/004/075/GCA_009004075.1_ASM900407v1	human blood	Japan:Tokyo	Homo sapiens
Acinetobacter_indicus_IHIT31229	Acinetobacter_indicus_CIP_110367	97.2258	Acinetobacter indicus	GCA_002938545.1	https://ftp.ncbi.nlm.nih.gov/genomes/all/GCA/002/938/545/GCA_002938545.1_ASM293854v1	blank	Germany	cattle
Acinetobacter_haemolyticus_AN61	Acinetobacter_haemolyticus_MTCC_9819	97.23	Acinetobacter haemolyticus	GCA_009899675.1	https://ftp.ncbi.nlm.nih.gov/genomes/all/GCA/009/899/675/GCA_009899675.1_ASM989967v1	Peritoneal dialysis fluid	Mexico: Puebla	Homo sapiens
Acinetobacter_pittii_PR316	Acinetobacter_pittii_ATCC_19004	97.236	Acinetobacter pittii	GCA_002137935.1	https://ftp.ncbi.nlm.nih.gov/genomes/all/GCA/002/137/935/GCA_002137935.1_ASM213793v1	blank	blank	blank
Acinetobacter_baumannii_AC1633	Acinetobacter_baumannii_ATCC_19606	97.2498	Acinetobacter baumannii	GCA_014874575.1	https://ftp.ncbi.nlm.nih.gov/genomes/all/GCA/014/874/575/GCA_014874575.1_ASM1487457v1	blood	Malaysia: Kuala Terengganu	Homo sapiens
Acinetobacter_indicus_IHIT31223	Acinetobacter_indicus_CIP_110367	97.2506	Acinetobacter indicus	GCA_002938445.1	https://ftp.ncbi.nlm.nih.gov/genomes/all/GCA/002/938/445/GCA_002938445.1_ASM293844v1	blank	Germany	cattle
Acinetobacter_sp._neg1	Acinetobacter_vivianii_CCM_8642	97.2519	Acinetobacter vivianii	GCA_000788125.1	https://ftp.ncbi.nlm.nih.gov/genomes/all/GCA/000/788/125/GCA_000788125.1_ac.159.2	soil from Negramaro wineyards	Italy: Brindisi, Cellino San Marco	blank
Acinetobacter_vivianii_ACIN00184	Acinetobacter_vivianii_CCM_8642	97.2549	Acinetobacter vivianii	GCA_016502725.1	https://ftp.ncbi.nlm.nih.gov/genomes/all/GCA/016/502/725/GCA_016502725.1_ASM1650272v1	Tissue	USA: Pittsburgh, Pennsylvania	Homo sapiens
Acinetobacter_haemolyticus_AN63	Acinetobacter_haemolyticus_MTCC_9819	97.257	Acinetobacter haemolyticus	GCA_009899625.1	https://ftp.ncbi.nlm.nih.gov/genomes/all/GCA/009/899/625/GCA_009899625.1_ASM989962v1	Peritoneal dialysis fluid	Mexico: Puebla	Homo sapiens
Acinetobacter_haemolyticus_AN10	Acinetobacter_haemolyticus_MTCC_9819	97.2588	Acinetobacter haemolyticus	GCA_009899845.1	https://ftp.ncbi.nlm.nih.gov/genomes/all/GCA/009/899/845/GCA_009899845.1_ASM989984v1	Peritoneal dialysis fluid	Mexico: Puebla	Homo sapiens
Acinetobacter_baumannii_MRSN7460	Acinetobacter_baumannii_CIP_70.34	97.2593	Acinetobacter baumannii	GCA_006492615.1	https://ftp.ncbi.nlm.nih.gov/genomes/all/GCA/006/492/615/GCA_006492615.1_ASM649261v1	wound	USA	Homo sapiens
Acinetobacter_ursingii_TUM15503	Acinetobacter_ursingii_DSM_16037	97.2626	Acinetobacter ursingii	GCA_009012875.1	https://ftp.ncbi.nlm.nih.gov/genomes/all/GCA/009/012/875/GCA_009012875.1_ASM901287v1	human blood	Japan:Tochigi	Homo sapiens
Acinetobacter_indicus_AI37	Acinetobacter_indicus_CIP_110367	97.2639	Acinetobacter indicus	GCA_012370935.1	https://ftp.ncbi.nlm.nih.gov/genomes/all/GCA/012/370/935/GCA_012370935.1_ASM1237093v1	cow	China	blank
Acinetobacter_tandoii_W4-4-4	Acinetobacter_tandoii_CIP_107469	97.2655	Acinetobacter tandoii	GCA_008867985.1	https://ftp.ncbi.nlm.nih.gov/genomes/all/GCA/008/867/985/GCA_008867985.1_ASM886798v1	water	Singapore	blank
Acinetobacter_indicus_IHIT33295	Acinetobacter_indicus_CIP_110367	97.2668	Acinetobacter indicus	GCA_002938905.1	https://ftp.ncbi.nlm.nih.gov/genomes/all/GCA/002/938/905/GCA_002938905.1_ASM293890v1	blank	Germany	cattle
Acinetobacter_sp._YH12151	Acinetobacter_pseudolwoffii_ANC_5044	97.2705	Acinetobacter pseudolwoffii	GCA_013418355.1	https://ftp.ncbi.nlm.nih.gov/genomes/all/GCA/013/418/355/GCA_013418355.1_ASM1341835v1	feces	China: Zhejiang	pig
Acinetobacter_sp._SwsAc5	Acinetobacter_towneri_DSM_14962	97.274	Acinetobacter towneri	GCA_013391485.1	https://ftp.ncbi.nlm.nih.gov/genomes/all/GCA/013/391/485/GCA_013391485.1_ASM1339148v1	hospital sewage	China: Southwest	blank
Acinetobacter_lanii_187	Acinetobacter_lanii_185	97.2743	Acinetobacter lanii	GCA_011191955.1	https://ftp.ncbi.nlm.nih.gov/genomes/all/GCA/011/191/955/GCA_011191955.1_ASM1119195v1	feces	China: Tibet autonomous region	Equus kiang
Acinetobacter_junii_SB132	Acinetobacter_junii_CIP_64.5	97.2759	Acinetobacter junii	GCA_004123275.1	https://ftp.ncbi.nlm.nih.gov/genomes/all/GCA/004/123/275/GCA_004123275.1_ASM412327v1	Aquatic macrophyte from water in front of the city	Brazil: Amazon	Eichornia crassipes
Acinetobacter_sp._YH12255	Acinetobacter_pseudolwoffii_ANC_5044	97.2802	Acinetobacter pseudolwoffii	GCA_013417355.1	https://ftp.ncbi.nlm.nih.gov/genomes/all/GCA/013/417/355/GCA_013417355.1_ASM1341735v1	feces	China: Shanghai	pig
Acinetobacter_junii_AJ_243	Acinetobacter_junii_CIP_64.5	97.2823	Acinetobacter junii	GCA_003939835.1	https://ftp.ncbi.nlm.nih.gov/genomes/all/GCA/003/939/835/GCA_003939835.1_ASM393983v1	washroom sink in hospital intensive care unit	Pakistan	blank
Acinetobacter_baumannii_E47	Acinetobacter_baumannii_ATCC_19606	97.2845	Acinetobacter baumannii	GCA_008931365.1	https://ftp.ncbi.nlm.nih.gov/genomes/all/GCA/008/931/365/GCA_008931365.1_ASM893136v1	Room 7	Australia: Sydney	blank
Acinetobacter_indicus_IHIT31225	Acinetobacter_indicus_CIP_110367	97.2861	Acinetobacter indicus	GCA_002938785.1	https://ftp.ncbi.nlm.nih.gov/genomes/all/GCA/002/938/785/GCA_002938785.1_ASM293878v1	blank	Germany	cattle
Acinetobacter_sp._YH12136	Acinetobacter_towneri_DSM_14962	97.2937	Acinetobacter towneri	GCA_013418545.1	https://ftp.ncbi.nlm.nih.gov/genomes/all/GCA/013/418/545/GCA_013418545.1_ASM1341854v1	sewage	China: Hainan	blank
Acinetobacter_haemolyticus_AN7	Acinetobacter_haemolyticus_CIP_64.3	97.2965	Acinetobacter haemolyticus	GCA_009899545.1	https://ftp.ncbi.nlm.nih.gov/genomes/all/GCA/009/899/545/GCA_009899545.1_ASM989954v1	Peritoneal dialysis fluid	Mexico: Puebla	Homo sapiens
Acinetobacter_haemolyticus_TG41244	Acinetobacter_haemolyticus_MTCC_9819	97.2973	Acinetobacter haemolyticus	GCA_003947885.1	https://ftp.ncbi.nlm.nih.gov/genomes/all/GCA/003/947/885/GCA_003947885.1_ASM394788v1	urine	USA: Arizona	Homo sapiens
Acinetobacter_indicus_IHIT31215	Acinetobacter_indicus_CIP_110367	97.3012	Acinetobacter indicus	GCA_002938675.1	https://ftp.ncbi.nlm.nih.gov/genomes/all/GCA/002/938/675/GCA_002938675.1_ASM293867v1	blank	Germany	cattle
Acinetobacter_ursingii_TUM15527	Acinetobacter_ursingii_DSM_16037	97.3054	Acinetobacter ursingii	GCA_009013415.1	https://ftp.ncbi.nlm.nih.gov/genomes/all/GCA/009/013/415/GCA_009013415.1_ASM901341v1	catheter	Japan:Kanagawa	blank
Acinetobacter_indicus_AI25	Acinetobacter_indicus_CIP_110367	97.3062	Acinetobacter indicus	GCA_012371125.1	https://ftp.ncbi.nlm.nih.gov/genomes/all/GCA/012/371/125/GCA_012371125.1_ASM1237112v1	cow	China	blank
Acinetobacter_sp._YT-02	Acinetobacter_towneri_DSM_14962	97.3072	Acinetobacter towneri	GCA_002412355.1	https://ftp.ncbi.nlm.nih.gov/genomes/all/GCA/002/412/355/GCA_002412355.1_ASM241235v1	the activated sludge from a sodium cyclamate production plant	China: Wuhan	blank
Acinetobacter_ursingii_TUM15054	Acinetobacter_ursingii_DSM_16037	97.3087	Acinetobacter ursingii	GCA_008979885.1	https://ftp.ncbi.nlm.nih.gov/genomes/all/GCA/008/979/885/GCA_008979885.1_ASM897988v1	human sputum	Japan:Tokyo	Homo sapiens
Acinetobacter_ursingii_TUM15289	Acinetobacter_ursingii_DSM_16037	97.3115	Acinetobacter ursingii	GCA_008994835.1	https://ftp.ncbi.nlm.nih.gov/genomes/all/GCA/008/994/835/GCA_008994835.1_ASM899483v1	human blood	Japan:Tokyo	Homo sapiens
Acinetobacter_haemolyticus_TJR01	Acinetobacter_haemolyticus_MTCC_9819	97.3139	Acinetobacter haemolyticus	GCA_004379355.1	https://ftp.ncbi.nlm.nih.gov/genomes/all/GCA/004/379/355/GCA_004379355.1_ASM437935v1	blank	China: Tianjin	Homo sapiens (respiratory patient)
Acinetobacter_lactucae_OTEC-02	Acinetobacter_lactucae_NRRL_B-41902	97.3144	Acinetobacter lactucae	GCA_002076935.1	https://ftp.ncbi.nlm.nih.gov/genomes/all/GCA/002/076/935/GCA_002076935.1_ASM207693v1	Soil	Mexico: Tuxtla Gutierrez, Chiapas	blank
Acinetobacter_indicus_IHIT31220	Acinetobacter_indicus_CIP_110367	97.315	Acinetobacter indicus	GCA_002938765.1	https://ftp.ncbi.nlm.nih.gov/genomes/all/GCA/002/938/765/GCA_002938765.1_ASM293876v1	blank	Germany	cattle
Acinetobacter_indicus_AI35	Acinetobacter_indicus_CIP_110367	97.3175	Acinetobacter indicus	GCA_012370815.1	https://ftp.ncbi.nlm.nih.gov/genomes/all/GCA/012/370/815/GCA_012370815.1_ASM1237081v1	cow	China	blank
Acinetobacter_ursingii_TUM15569	Acinetobacter_ursingii_DSM_16037	97.3189	Acinetobacter ursingii	GCA_009014155.1	https://ftp.ncbi.nlm.nih.gov/genomes/all/GCA/009/014/155/GCA_009014155.1_ASM901415v1	human sputum	Japan:Kanagawa	Homo sapiens
Acinetobacter_calcoaceticus_GK1	Acinetobacter_calcoaceticus_DSM_30006	97.3191	Acinetobacter calcoaceticus	GCA_000952075.1	https://ftp.ncbi.nlm.nih.gov/genomes/all/GCA/000/952/075/GCA_000952075.1_ASM95207v1	diesel contaminated rhizosphere	Belgium: Genk	Populus
Acinetobacter_ursingii_TUM15111	Acinetobacter_ursingii_DSM_16037	97.3205	Acinetobacter ursingii	GCA_008982325.1	https://ftp.ncbi.nlm.nih.gov/genomes/all/GCA/008/982/325/GCA_008982325.1_ASM898232v1	catheter	Japan:Tokyo	blank
Acinetobacter_sp._CIP_102637	Acinetobacter_parvus_DSM_16617	97.3207	Acinetobacter parvus	GCA_000368425.1	https://ftp.ncbi.nlm.nih.gov/genomes/all/GCA/000/368/425/GCA_000368425.1_Acin_sp_CIP_102637_V1	blank	blank	blank
Acinetobacter_sp._YH01006	Acinetobacter_pseudolwoffii_ANC_5044	97.3228	Acinetobacter pseudolwoffii	GCA_013420445.1	https://ftp.ncbi.nlm.nih.gov/genomes/all/GCA/013/420/445/GCA_013420445.1_ASM1342044v1	feces	China: Shanghai	pig
Acinetobacter_sp._YH12131	Acinetobacter_towneri_DSM_14962	97.3236	Acinetobacter towneri	GCA_013418635.1	https://ftp.ncbi.nlm.nih.gov/genomes/all/GCA/013/418/635/GCA_013418635.1_ASM1341863v1	feces	China: Hainan	pig
Acinetobacter_haemolyticus_AN3	Acinetobacter_haemolyticus_MTCC_9819	97.3249	Acinetobacter haemolyticus	GCA_009892325.1	https://ftp.ncbi.nlm.nih.gov/genomes/all/GCA/009/892/325/GCA_009892325.1_ASM989232v1	Peritoneal dialysis liquid	Mexico: Puebla	Homo sapiens
Acinetobacter_baumannii_DMS06669	Acinetobacter_baumannii_JCM_6841	97.3256	Acinetobacter baumannii	GCA_009857695.1	https://ftp.ncbi.nlm.nih.gov/genomes/all/GCA/009/857/695/GCA_009857695.1_ASM985769v1	blank	Viet Nam	Homo sapiens
Acinetobacter_sp._YH12106	Acinetobacter_pseudolwoffii_ANC_5044	97.3303	Acinetobacter pseudolwoffii	GCA_013418995.1	https://ftp.ncbi.nlm.nih.gov/genomes/all/GCA/013/418/995/GCA_013418995.1_ASM1341899v1	feces	China: Shanghai	pig
Acinetobacter_indicus_AI1	Acinetobacter_indicus_CIP_110367	97.3308	Acinetobacter indicus	GCA_012371455.1	https://ftp.ncbi.nlm.nih.gov/genomes/all/GCA/012/371/455/GCA_012371455.1_ASM1237145v1	cow	China	blank
Acinetobacter_sp._YH12153	Acinetobacter_pseudolwoffii_ANC_5044	97.3309	Acinetobacter pseudolwoffii	GCA_013418275.1	https://ftp.ncbi.nlm.nih.gov/genomes/all/GCA/013/418/275/GCA_013418275.1_ASM1341827v1	feces	China: Zhejiang	pig
Acinetobacter_junii_WCHAJ010047	Acinetobacter_junii_CIP_64.5	97.3327	Acinetobacter junii	GCA_004296305.1	https://ftp.ncbi.nlm.nih.gov/genomes/all/GCA/004/296/305/GCA_004296305.1_ASM429630v1	Sewage	China: Chengdu, Sichuan	blank
Acinetobacter_baumannii_233846	Acinetobacter_baumannii_DSM_30007	97.34	Acinetobacter baumannii	GCA_000682435.1	https://ftp.ncbi.nlm.nih.gov/genomes/all/GCA/000/682/435/GCA_000682435.1_ASM68243v1	sputum	USA	Homo sapiens
Acinetobacter_indicus_94-2	Acinetobacter_indicus_CIP_110367	97.3405	Acinetobacter indicus	GCA_012278715.1	https://ftp.ncbi.nlm.nih.gov/genomes/all/GCA/012/278/715/GCA_012278715.1_ASM1227871v1	blank	China	cow
Acinetobacter_junii_ACIN00233	Acinetobacter_junii_CIP_64.5	97.3423	Acinetobacter junii	GCA_016502415.1	https://ftp.ncbi.nlm.nih.gov/genomes/all/GCA/016/502/415/GCA_016502415.1_ASM1650241v1	Tissue	USA: Pittsburgh, Pennsylvania	Homo sapiens
Acinetobacter_sp._ACNIH1	Acinetobacter_variabilis_NIPH_2171	97.3426	Acinetobacter variabilis	GCA_002934695.1	https://ftp.ncbi.nlm.nih.gov/genomes/all/GCA/002/934/695/GCA_002934695.1_ASM293469v1	blank	USA	blank
Acinetobacter_indicus_IHIT31228	Acinetobacter_indicus_CIP_110367	97.3438	Acinetobacter indicus	GCA_002938515.1	https://ftp.ncbi.nlm.nih.gov/genomes/all/GCA/002/938/515/GCA_002938515.1_ASM293851v1	blank	Germany	cattle
Acinetobacter_calcoaceticus_RUH2202	Acinetobacter_calcoaceticus_DSM_30006	97.3455	Acinetobacter calcoaceticus	GCA_000162035.1	https://ftp.ncbi.nlm.nih.gov/genomes/all/GCA/000/162/035/GCA_000162035.1_ASM16203v1	blank	blank	blank
Acinetobacter_indicus_IHIT32859	Acinetobacter_indicus_CIP_110367	97.349	Acinetobacter indicus	GCA_002938865.1	https://ftp.ncbi.nlm.nih.gov/genomes/all/GCA/002/938/865/GCA_002938865.1_ASM293886v1	blank	Germany	cattle
Acinetobacter_junii_YR7	Acinetobacter_junii_CIP_64.5	97.3494	Acinetobacter junii	GCA_018336855.1	https://ftp.ncbi.nlm.nih.gov/genomes/all/GCA/018/336/855/GCA_018336855.1_ASM1833685v1	feces	China: Zhejiang	blank
Acinetobacter_indicus_IHIT31669	Acinetobacter_indicus_CIP_110367	97.3501	Acinetobacter indicus	GCA_002938585.1	https://ftp.ncbi.nlm.nih.gov/genomes/all/GCA/002/938/585/GCA_002938585.1_ASM293858v1	blank	Germany	cattle
Acinetobacter_indicus_IHIT31232	Acinetobacter_indicus_CIP_110367	97.3504	Acinetobacter indicus	GCA_002938565.1	https://ftp.ncbi.nlm.nih.gov/genomes/all/GCA/002/938/565/GCA_002938565.1_ASM293856v1	blank	Germany	cattle
Acinetobacter_sp._SK-43	Acinetobacter_junii_CIP_64.5	97.3559	Acinetobacter junii	GCA_015351505.1	https://ftp.ncbi.nlm.nih.gov/genomes/all/GCA/015/351/505/GCA_015351505.1_ASM1535150v1	gold particles	Australia: Kilkivan	blank
Acinetobacter_sp._YH12103	Acinetobacter_pseudolwoffii_ANC_5044	97.3581	Acinetobacter pseudolwoffii	GCA_013419115.1	https://ftp.ncbi.nlm.nih.gov/genomes/all/GCA/013/419/115/GCA_013419115.1_ASM1341911v1	feces	China: Shanghai	pig
Acinetobacter_calcoaceticus_RS3	Acinetobacter_calcoaceticus_DSM_30006	97.3587	Acinetobacter calcoaceticus	GCA_003999925.1	https://ftp.ncbi.nlm.nih.gov/genomes/all/GCA/003/999/925/GCA_003999925.1_ASM399992v1	soil	Lebanon	blank
Acinetobacter_indicus_IHIT32861	Acinetobacter_indicus_CIP_110367	97.3617	Acinetobacter indicus	GCA_002938885.1	https://ftp.ncbi.nlm.nih.gov/genomes/all/GCA/002/938/885/GCA_002938885.1_ASM293888v1	blank	Germany	cattle
Acinetobacter_indicus_80-1-2	Acinetobacter_indicus_CIP_110367	97.3618	Acinetobacter indicus	GCA_012278735.1	https://ftp.ncbi.nlm.nih.gov/genomes/all/GCA/012/278/735/GCA_012278735.1_ASM1227873v1	blank	China	cow
Acinetobacter_baumannii_SP5538	Acinetobacter_baumannii_DSM_30007	97.363	Acinetobacter baumannii	GCA_010500665.1	https://ftp.ncbi.nlm.nih.gov/genomes/all/GCA/010/500/665/GCA_010500665.1_ASM1050066v1	Endotracheal Aspirate	India: Vellore	Homo sapiens
Acinetobacter_indicus_AI11	Acinetobacter_indicus_CIP_110367	97.3642	Acinetobacter indicus	GCA_012366895.1	https://ftp.ncbi.nlm.nih.gov/genomes/all/GCA/012/366/895/GCA_012366895.1_ASM1236689v1	cow	China	blank
Acinetobacter_baumannii_FDAARGOS_540	Acinetobacter_baumannii_CIP_70.34	97.3653	Acinetobacter baumannii	GCA_003812065.1	https://ftp.ncbi.nlm.nih.gov/genomes/all/GCA/003/812/065/GCA_003812065.1_ASM381206v1	blank	blank	Homo sapiens
Acinetobacter_indicus_AI38	Acinetobacter_indicus_CIP_110367	97.3658	Acinetobacter indicus	GCA_012370915.1	https://ftp.ncbi.nlm.nih.gov/genomes/all/GCA/012/370/915/GCA_012370915.1_ASM1237091v1	cow	China	blank
Acinetobacter_indicus_IHIT31218	Acinetobacter_indicus_CIP_110367	97.3692	Acinetobacter indicus	GCA_002938745.1	https://ftp.ncbi.nlm.nih.gov/genomes/all/GCA/002/938/745/GCA_002938745.1_ASM293874v1	blank	Germany	cattle
Acinetobacter_baumannii_36-1454	Acinetobacter_baumannii_ATCC_19606	97.3699	Acinetobacter baumannii	GCA_019192905.1	https://ftp.ncbi.nlm.nih.gov/genomes/all/GCA/019/192/905/GCA_019192905.1_ASM1919290v1	blank	Russia: Moscow	Homo sapiens
Acinetobacter_junii_NIPH_182	Acinetobacter_junii_CIP_64.5	97.3709	Acinetobacter junii	GCA_000368745.1	https://ftp.ncbi.nlm.nih.gov/genomes/all/GCA/000/368/745/GCA_000368745.1_Acin_juni_NIPH_182_V1	blank	blank	blank
Acinetobacter_indicus_AI41	Acinetobacter_indicus_CIP_110367	97.3715	Acinetobacter indicus	GCA_012370875.1	https://ftp.ncbi.nlm.nih.gov/genomes/all/GCA/012/370/875/GCA_012370875.1_ASM1237087v1	cow	China	blank
Acinetobacter_ursingii_TUM15522	Acinetobacter_ursingii_DSM_16037	97.3783	Acinetobacter ursingii	GCA_009013315.1	https://ftp.ncbi.nlm.nih.gov/genomes/all/GCA/009/013/315/GCA_009013315.1_ASM901331v1	human blood	Japan:Kanagawa	Homo sapiens
Acinetobacter_defluvii_Ac_1538	Acinetobacter_defluvii_WCHA30	97.3798	Acinetobacter defluvii	GCA_013072655.1	https://ftp.ncbi.nlm.nih.gov/genomes/all/GCA/013/072/655/GCA_013072655.1_ASM1307265v1	Cow meat	Portugal: Porto	blank
Acinetobacter_ursingii_NIPH_706	Acinetobacter_ursingii_DSM_16037	97.3799	Acinetobacter ursingii	GCA_000369885.1	https://ftp.ncbi.nlm.nih.gov/genomes/all/GCA/000/369/885/GCA_000369885.1_Acin_ursi_NIPH_706_V1	blank	blank	blank
Acinetobacter_indicus_IHIT31224	Acinetobacter_indicus_CIP_110367	97.3833	Acinetobacter indicus	GCA_002938505.1	https://ftp.ncbi.nlm.nih.gov/genomes/all/GCA/002/938/505/GCA_002938505.1_ASM293850v1	blank	Germany	cattle
Acinetobacter_baumannii_BAuABod-3	Acinetobacter_baumannii_DSM_30007	97.3869	Acinetobacter baumannii	GCA_002573805.1	https://ftp.ncbi.nlm.nih.gov/genomes/all/GCA/002/573/805/GCA_002573805.1_ASM257380v1	blank	Germany	turkey
Acinetobacter_baumannii_SP4433	Acinetobacter_baumannii_DSM_30007	97.387	Acinetobacter baumannii	GCA_010500545.1	https://ftp.ncbi.nlm.nih.gov/genomes/all/GCA/010/500/545/GCA_010500545.1_ASM1050054v1	Endotracheal Aspirate	India: Vellore	Homo sapiens
Acinetobacter_indicus_AI30	Acinetobacter_indicus_CIP_110367	97.3917	Acinetobacter indicus	GCA_012371275.1	https://ftp.ncbi.nlm.nih.gov/genomes/all/GCA/012/371/275/GCA_012371275.1_ASM1237127v1	cow	China	blank
Acinetobacter_sp._ANC_5318	Acinetobacter_pseudolwoffii_ANC_5044	97.395	Acinetobacter pseudolwoffii	GCA_002797085.1	https://ftp.ncbi.nlm.nih.gov/genomes/all/GCA/002/797/085/GCA_002797085.1_ASM279708v1	nose	Czech Republic: Valasske Mezirici	horse
Acinetobacter_indicus_AI40	Acinetobacter_indicus_CIP_110367	97.3959	Acinetobacter indicus	GCA_012370895.1	https://ftp.ncbi.nlm.nih.gov/genomes/all/GCA/012/370/895/GCA_012370895.1_ASM1237089v1	cow	China	blank
Acinetobacter_ursingii_TUM15547	Acinetobacter_ursingii_DSM_16037	97.3968	Acinetobacter ursingii	GCA_009013795.1	https://ftp.ncbi.nlm.nih.gov/genomes/all/GCA/009/013/795/GCA_009013795.1_ASM901379v1	human sputum	Japan:Kanagawa	Homo sapiens
Acinetobacter_baumannii_1419130	Acinetobacter_baumannii_CIP_70.34	97.3972	Acinetobacter baumannii	GCA_000580595.1	https://ftp.ncbi.nlm.nih.gov/genomes/all/GCA/000/580/595/GCA_000580595.1_ASM58059v1	perirectal	USA	Homo sapiens
Acinetobacter_venetianus_LUH7437	Acinetobacter_venetianus_RAG-1	97.3977	Acinetobacter venetianus	GCA_001584665.1	https://ftp.ncbi.nlm.nih.gov/genomes/all/GCA/001/584/665/GCA_001584665.1_ASM158466v1	Vegetable market	Hong Kong	blank
Acinetobacter_baumannii_SP192	Acinetobacter_baumannii_JCM_6841	97.3978	Acinetobacter baumannii	GCA_011601815.1	https://ftp.ncbi.nlm.nih.gov/genomes/all/GCA/011/601/815/GCA_011601815.1_ASM1160181v1	Endotracheal Aspirate	India: Vellore	Homo sapiens
Acinetobacter_indicus_AI6	Acinetobacter_indicus_CIP_110367	97.3978	Acinetobacter indicus	GCA_012366875.1	https://ftp.ncbi.nlm.nih.gov/genomes/all/GCA/012/366/875/GCA_012366875.1_ASM1236687v1	cow	China	blank
Acinetobacter_indicus_IHIT32429	Acinetobacter_indicus_CIP_110367	97.3981	Acinetobacter indicus	GCA_002938605.1	https://ftp.ncbi.nlm.nih.gov/genomes/all/GCA/002/938/605/GCA_002938605.1_ASM293860v1	blank	Germany	cattle
Acinetobacter_baumannii_Naval-18	Acinetobacter_baumannii_ATCC_19606	97.3987	Acinetobacter baumannii	GCA_000214965.2	https://ftp.ncbi.nlm.nih.gov/genomes/all/GCA/000/214/965/GCA_000214965.2_gacin09v1.0	blank	USA: National Naval Medical Center, Bethesda, MD	Homo sapiens
Acinetobacter_indicus_AI34	Acinetobacter_indicus_CIP_110367	97.3989	Acinetobacter indicus	GCA_012371295.1	https://ftp.ncbi.nlm.nih.gov/genomes/all/GCA/012/371/295/GCA_012371295.1_ASM1237129v1	cow	China	blank
Acinetobacter_baumannii_CI86	Acinetobacter_baumannii_ATCC_19606	97.3995	Acinetobacter baumannii	GCA_000516575.2	https://ftp.ncbi.nlm.nih.gov/genomes/all/GCA/000/516/575/GCA_000516575.2_ASM51657v2	superficial wound	Iraq	Homo sapiens
Acinetobacter_baumannii_207_18	Acinetobacter_baumannii_DSM_30007	97.3998	Acinetobacter baumannii	GCA_015537085.1	https://ftp.ncbi.nlm.nih.gov/genomes/all/GCA/015/537/085/GCA_015537085.1_ASM1553708v1	tracheal secretion	Brazil: Sao Paulo	Homo sapiens
Acinetobacter_indicus_AI28	Acinetobacter_indicus_CIP_110367	97.4001	Acinetobacter indicus	GCA_012371045.1	https://ftp.ncbi.nlm.nih.gov/genomes/all/GCA/012/371/045/GCA_012371045.1_ASM1237104v1	cow	China	blank
Acinetobacter_baumannii_P7774	Acinetobacter_baumannii_DSM_30007	97.4011	Acinetobacter baumannii	GCA_005518095.1	https://ftp.ncbi.nlm.nih.gov/genomes/all/GCA/005/518/095/GCA_005518095.1_ASM551809v1	Pus	India	Homo sapiens
Acinetobacter_baumannii_ABBL018	Acinetobacter_baumannii_DSM_30007	97.4023	Acinetobacter baumannii	GCA_001432545.1	https://ftp.ncbi.nlm.nih.gov/genomes/all/GCA/001/432/545/GCA_001432545.1_ASM143254v1	Blood	USA: Chicago	Homo sapiens
Acinetobacter_baumannii_SP4956	Acinetobacter_baumannii_CIP_70.34	97.4028	Acinetobacter baumannii	GCA_011603385.1	https://ftp.ncbi.nlm.nih.gov/genomes/all/GCA/011/603/385/GCA_011603385.1_ASM1160338v1	Endotracheal Aspirate	India: Vellore	Homo sapiens
Acinetobacter_indicus_AI15	Acinetobacter_indicus_CIP_110367	97.4029	Acinetobacter indicus	GCA_012366785.1	https://ftp.ncbi.nlm.nih.gov/genomes/all/GCA/012/366/785/GCA_012366785.1_ASM1236678v1	cow	China	blank
Acinetobacter_sp._Root1280	Acinetobacter_guillouiae_CIP_63.46	97.4048	Acinetobacter guillouiae	GCA_001425285.1	https://ftp.ncbi.nlm.nih.gov/genomes/all/GCA/001/425/285/GCA_001425285.1_Root1280	root	Germany: Cologne	Arabidopsis thaliana
Acinetobacter_ursingii_UBA1533	Acinetobacter_ursingii_DSM_16037	97.4075	Acinetobacter ursingii	GCA_002323285.1	https://ftp.ncbi.nlm.nih.gov/genomes/all/GCA/002/323/285/GCA_002323285.1_ASM232328v1	wood	USA:New York City	blank
Acinetobacter_baumannii_PR374	Acinetobacter_baumannii_ATCC_19606	97.4086	Acinetobacter baumannii	GCA_002137255.1	https://ftp.ncbi.nlm.nih.gov/genomes/all/GCA/002/137/255/GCA_002137255.1_ASM213725v1	blank	blank	blank
Acinetobacter_baumannii_17A1904	Acinetobacter_baumannii_DSM_30007	97.4089	Acinetobacter baumannii	GCA_020256045.1	https://ftp.ncbi.nlm.nih.gov/genomes/all/GCA/020/256/045/GCA_020256045.1_ASM2025604v1	wound	France: Besancon	Homo sapiens
Acinetobacter_baumannii_BA35394	Acinetobacter_baumannii_DSM_30007	97.4106	Acinetobacter baumannii	GCA_011601545.1	https://ftp.ncbi.nlm.nih.gov/genomes/all/GCA/011/601/545/GCA_011601545.1_ASM1160154v1	blood	India: Vellore	Homo sapiens
Acinetobacter_pittii_XH765	Acinetobacter_pittii_DSM_25618	97.4116	Acinetobacter pittii	GCA_001861625.1	https://ftp.ncbi.nlm.nih.gov/genomes/all/GCA/001/861/625/GCA_001861625.1_ASM186162v1	sputum	China: Hangzhou	Homo sapiens
Acinetobacter_indicus_CMG3-2	Acinetobacter_indicus_CIP_110367	97.4127	Acinetobacter indicus	GCA_010917815.1	https://ftp.ncbi.nlm.nih.gov/genomes/all/GCA/010/917/815/GCA_010917815.1_ASM1091781v1	stool	China:Chengmai County, Hainan Province	goose
Acinetobacter_baumannii_SP5394	Acinetobacter_baumannii_DSM_30007	97.4146	Acinetobacter baumannii	GCA_011603295.1	https://ftp.ncbi.nlm.nih.gov/genomes/all/GCA/011/603/295/GCA_011603295.1_ASM1160329v1	Endotracheal Aspirate	India: Vellore	Homo sapiens
Acinetobacter_indicus_IHIT33298	Acinetobacter_indicus_CIP_110367	97.4152	Acinetobacter indicus	GCA_002938915.1	https://ftp.ncbi.nlm.nih.gov/genomes/all/GCA/002/938/915/GCA_002938915.1_ASM293891v1	blank	Germany	cattle
Acinetobacter_variabilis_RYU24	Acinetobacter_variabilis_NIPH_2171	97.4158	Acinetobacter variabilis	GCA_018409485.1	https://ftp.ncbi.nlm.nih.gov/genomes/all/GCA/018/409/485/GCA_018409485.1_ASM1840948v1	human fecal	Japan:Okinawa, Naha	Homo sapiens
Acinetobacter_baumannii_5021_13	Acinetobacter_baumannii_ATCC_19606	97.4162	Acinetobacter baumannii	GCA_001276085.1	https://ftp.ncbi.nlm.nih.gov/genomes/all/GCA/001/276/085/GCA_001276085.1_ASM127608v1	Cerebrospinal fluid	India	blank
Acinetobacter_baumannii_ARLG1873	Acinetobacter_baumannii_CIP_70.34	97.4166	Acinetobacter baumannii	GCA_002145395.1	https://ftp.ncbi.nlm.nih.gov/genomes/all/GCA/002/145/395/GCA_002145395.1_ASM214539v1	blank	blank	blank
Acinetobacter_ursingii_TUM15406	Acinetobacter_ursingii_DSM_16037	97.4179	Acinetobacter ursingii	GCA_009004035.1	https://ftp.ncbi.nlm.nih.gov/genomes/all/GCA/009/004/035/GCA_009004035.1_ASM900403v1	human blood	Japan:Tokyo	Homo sapiens
Acinetobacter_ursingii_TUM15518	Acinetobacter_ursingii_DSM_16037	97.419	Acinetobacter ursingii	GCA_009013235.1	https://ftp.ncbi.nlm.nih.gov/genomes/all/GCA/009/013/235/GCA_009013235.1_ASM901323v1	human blood	Japan:Kanagawa	Homo sapiens
Acinetobacter_sp._UBA3461	Acinetobacter_schindleri_CIP_107287	97.4211	Acinetobacter schindleri	GCA_002381195.1	https://ftp.ncbi.nlm.nih.gov/genomes/all/GCA/002/381/195/GCA_002381195.1_ASM238119v1	plastic	USA:New York City	blank
Acinetobacter_baumannii_Ab59	Acinetobacter_baumannii_DSM_30007	97.4215	Acinetobacter baumannii	GCA_900476665.2	https://ftp.ncbi.nlm.nih.gov/genomes/all/GCA/900/476/665/GCA_900476665.2_7468_2_59	blank	blank	blank
Acinetobacter_baumannii_AB43	Acinetobacter_baumannii_CIP_70.34	97.4217	Acinetobacter baumannii	GCA_900117495.2	https://ftp.ncbi.nlm.nih.gov/genomes/all/GCA/900/117/495/GCA_900117495.2_7468_1_43	NA	Australia	blank
Acinetobacter_indicus_IHIT32862	Acinetobacter_indicus_CIP_110367	97.4231	Acinetobacter indicus	GCA_002938645.1	https://ftp.ncbi.nlm.nih.gov/genomes/all/GCA/002/938/645/GCA_002938645.1_ASM293864v1	blank	Germany	cattle
Acinetobacter_baumannii_OCU_Ac18	Acinetobacter_baumannii_ATCC_19606	97.426	Acinetobacter baumannii	GCA_019703285.1	https://ftp.ncbi.nlm.nih.gov/genomes/all/GCA/019/703/285/GCA_019703285.1_ASM1970328v1	blank	blank	blank
Acinetobacter_ursingii_NBRC_110512	Acinetobacter_ursingii_DSM_16037	97.4262	Acinetobacter ursingii	GCA_000949815.1	https://ftp.ncbi.nlm.nih.gov/genomes/all/GCA/000/949/815/GCA_000949815.1_ASM94981v1	blank	blank	blank
Acinetobacter_sp._YH12105	Acinetobacter_pseudolwoffii_ANC_5044	97.4264	Acinetobacter pseudolwoffii	GCA_013419095.1	https://ftp.ncbi.nlm.nih.gov/genomes/all/GCA/013/419/095/GCA_013419095.1_ASM1341909v1	feces	China: Shanghai	pig
Acinetobacter_indicus_B18	Acinetobacter_indicus_CIP_110367	97.4268	Acinetobacter indicus	GCA_010918375.1	https://ftp.ncbi.nlm.nih.gov/genomes/all/GCA/010/918/375/GCA_010918375.1_ASM1091837v1	stool	China:Foshan City, Guangdong Province	pigeon
Acinetobacter_junii_lzh-X15	Acinetobacter_junii_CIP_64.5	97.4273	Acinetobacter junii	GCA_002761875.1	https://ftp.ncbi.nlm.nih.gov/genomes/all/GCA/002/761/875/GCA_002761875.1_ASM276187v1	soil	China:taian	blank
Acinetobacter_sp._YH16051	Acinetobacter_towneri_DSM_14962	97.4285	Acinetobacter towneri	GCA_013417135.1	https://ftp.ncbi.nlm.nih.gov/genomes/all/GCA/013/417/135/GCA_013417135.1_ASM1341713v1	feces	China: Hunan	pig
Acinetobacter_baumannii_HWBA8	Acinetobacter_baumannii_DSM_30007	97.4292	Acinetobacter baumannii	GCA_002082785.1	https://ftp.ncbi.nlm.nih.gov/genomes/all/GCA/002/082/785/GCA_002082785.1_ASM208278v1	sputum	South Korea: Busan	Homo sapiens
Acinetobacter_baumannii_WM97a	Acinetobacter_baumannii_JCM_6841	97.4305	Acinetobacter baumannii	GCA_014842895.1	https://ftp.ncbi.nlm.nih.gov/genomes/all/GCA/014/842/895/GCA_014842895.1_ASM1484289v1	blank	Australia: Westmead, Sydney	Homo sapiens
Acinetobacter_ursingii_TUM15517	Acinetobacter_ursingii_DSM_16037	97.4308	Acinetobacter ursingii	GCA_009013215.1	https://ftp.ncbi.nlm.nih.gov/genomes/all/GCA/009/013/215/GCA_009013215.1_ASM901321v1	human blood	Japan:Kanagawa	Homo sapiens
Acinetobacter_baumannii_VB82	Acinetobacter_baumannii_JCM_6841	97.4326	Acinetobacter baumannii	GCA_012934905.1	https://ftp.ncbi.nlm.nih.gov/genomes/all/GCA/012/934/905/GCA_012934905.1_ASM1293490v1	blood	India	Homo sapiens
Acinetobacter_baumannii_CI79	Acinetobacter_baumannii_DSM_30007	97.4333	Acinetobacter baumannii	GCA_000516635.2	https://ftp.ncbi.nlm.nih.gov/genomes/all/GCA/000/516/635/GCA_000516635.2_ASM51663v2	respiratory tract	Iraq	Homo sapiens
Acinetobacter_junii_KCTC_42611	Acinetobacter_junii_CIP_64.5	97.4339	Acinetobacter junii	GCA_012271855.1	https://ftp.ncbi.nlm.nih.gov/genomes/all/GCA/012/271/855/GCA_012271855.1_ASM1227185v1	seedlings	China: Shangqiu	Wheat
Acinetobacter_baumannii_CCBH26454	Acinetobacter_baumannii_CIP_70.34	97.4344	Acinetobacter baumannii	GCA_016056095.1	https://ftp.ncbi.nlm.nih.gov/genomes/all/GCA/016/056/095/GCA_016056095.1_ASM1605609v1	blood	Brazil	Homo sapiens
Acinetobacter_ursingii_UBA3251	Acinetobacter_ursingii_DSM_16037	97.4349	Acinetobacter ursingii	GCA_002362745.1	https://ftp.ncbi.nlm.nih.gov/genomes/all/GCA/002/362/745/GCA_002362745.1_ASM236274v1	New York City MTA subway	USA:New York City	blank
Acinetobacter_haemolyticus_A109R1B4	Acinetobacter_haemolyticus_MTCC_9819	97.4353	Acinetobacter haemolyticus	GCA_010014695.1	https://ftp.ncbi.nlm.nih.gov/genomes/all/GCA/010/014/695/GCA_010014695.1_ASM1001469v1	Rectum	South Africa: Ozwatini	Homo sapiens
Acinetobacter_sp._YH01008	Acinetobacter_pseudolwoffii_ANC_5044	97.4358	Acinetobacter pseudolwoffii	GCA_013420435.1	https://ftp.ncbi.nlm.nih.gov/genomes/all/GCA/013/420/435/GCA_013420435.1_ASM1342043v1	feces	China: Shanghai	pig
Acinetobacter_baumannii_TUM16645	Acinetobacter_baumannii_ATCC_19606	97.4359	Acinetobacter baumannii	GCA_008581785.1	https://ftp.ncbi.nlm.nih.gov/genomes/all/GCA/008/581/785/GCA_008581785.1_ASM858178v1	sink	Japan	blank
Acinetobacter_lactucae_ME27	Acinetobacter_lactucae_NRRL_B-41902	97.438	Acinetobacter lactucae	GCA_903971085.1	https://ftp.ncbi.nlm.nih.gov/genomes/all/GCA/903/971/085/GCA_903971085.1_ASM90397108v1	Aphanamixis polystachya leaf	blank	blank
Acinetobacter_ursingii_TUM15492	Acinetobacter_ursingii_DSM_16037	97.4398	Acinetobacter ursingii	GCA_009011735.1	https://ftp.ncbi.nlm.nih.gov/genomes/all/GCA/009/011/735/GCA_009011735.1_ASM901173v1	human blood	Japan:Tochigi	Homo sapiens
Acinetobacter_baumannii_PR337	Acinetobacter_baumannii_DSM_30007	97.4402	Acinetobacter baumannii	GCA_002137725.1	https://ftp.ncbi.nlm.nih.gov/genomes/all/GCA/002/137/725/GCA_002137725.1_ASM213772v1	blank	blank	blank
Acinetobacter_baumannii_VB35179	Acinetobacter_baumannii_DSM_30007	97.4404	Acinetobacter baumannii	GCA_005280395.1	https://ftp.ncbi.nlm.nih.gov/genomes/all/GCA/005/280/395/GCA_005280395.1_ASM528039v1	blood	India	Homo sapiens
Acinetobacter_sp._F9	Acinetobacter_pseudolwoffii_ANC_5044	97.4422	Acinetobacter pseudolwoffii	GCA_019195275.1	https://ftp.ncbi.nlm.nih.gov/genomes/all/GCA/019/195/275/GCA_019195275.1_ASM1919527v1	feces	South Korea: Seoul grand park	camel
Acinetobacter_baumannii_SP4522	Acinetobacter_baumannii_DSM_30007	97.4431	Acinetobacter baumannii	GCA_011603585.1	https://ftp.ncbi.nlm.nih.gov/genomes/all/GCA/011/603/585/GCA_011603585.1_ASM1160358v1	Endotracheal Aspirate	India: Vellore	Homo sapiens
Acinetobacter_baumannii_MRSN32104	Acinetobacter_baumannii_DSM_30007	97.4431	Acinetobacter baumannii	GCA_006492805.1	https://ftp.ncbi.nlm.nih.gov/genomes/all/GCA/006/492/805/GCA_006492805.1_ASM649280v1	respiratory	Germany	Homo sapiens
Acinetobacter_calcoaceticus_TG19585	Acinetobacter_calcoaceticus_DSM_30006	97.4439	Acinetobacter calcoaceticus	GCA_000302295.1	https://ftp.ncbi.nlm.nih.gov/genomes/all/GCA/000/302/295/GCA_000302295.1_ASM30229v1	environment	blank	blank
Acinetobacter_baumannii_AMA3	Acinetobacter_baumannii_DSM_30007	97.4447	Acinetobacter baumannii	GCA_009645745.1	https://ftp.ncbi.nlm.nih.gov/genomes/all/GCA/009/645/745/GCA_009645745.1_ASM964574v1	blank	blank	Homo sapiens
Acinetobacter_baumannii_AMA7	Acinetobacter_baumannii_JCM_6841	97.4447	Acinetobacter baumannii	GCA_009645275.1	https://ftp.ncbi.nlm.nih.gov/genomes/all/GCA/009/645/275/GCA_009645275.1_ASM964527v1	blank	blank	Homo sapiens
Acinetobacter_baumannii_TUM16624	Acinetobacter_baumannii_ATCC_19606	97.4453	Acinetobacter baumannii	GCA_008581385.1	https://ftp.ncbi.nlm.nih.gov/genomes/all/GCA/008/581/385/GCA_008581385.1_ASM858138v1	water tap	Japan	blank
Acinetobacter_indicus_AI2	Acinetobacter_indicus_CIP_110367	97.4454	Acinetobacter indicus	GCA_012366935.1	https://ftp.ncbi.nlm.nih.gov/genomes/all/GCA/012/366/935/GCA_012366935.1_ASM1236693v1	cow	China	blank
Acinetobacter_ursingii_NBRC_110511	Acinetobacter_ursingii_DSM_16037	97.4456	Acinetobacter ursingii	GCA_000934145.1	https://ftp.ncbi.nlm.nih.gov/genomes/all/GCA/000/934/145/GCA_000934145.1_ASM93414v1	blank	blank	blank
Acinetobacter_baumannii_YMC2011_7_R812	Acinetobacter_baumannii_DSM_30007	97.4471	Acinetobacter baumannii	GCA_003843625.1	https://ftp.ncbi.nlm.nih.gov/genomes/all/GCA/003/843/625/GCA_003843625.1_ASM384362v1	sputum	South Korea: Seoul	Homo sapiens
Acinetobacter_sp._COS3	Acinetobacter_venetianus_RAG-1	97.4485	Acinetobacter venetianus	GCA_000475335.1	https://ftp.ncbi.nlm.nih.gov/genomes/all/GCA/000/475/335/GCA_000475335.1_De_Novo_assembly	oil-contaminated beach sediment	blank	blank
Acinetobacter_baumannii_D46	Acinetobacter_baumannii_DSM_30007	97.4496	Acinetobacter baumannii	GCA_018831125.1	https://ftp.ncbi.nlm.nih.gov/genomes/all/GCA/018/831/125/GCA_018831125.1_ASM1883112v1	mid stream urine	Australia: Sydney	Homo sapiens
Acinetobacter_sp._FDAARGOS_559	Acinetobacter_baumannii_DSM_30007	97.45	Acinetobacter baumannii	GCA_003940475.1	https://ftp.ncbi.nlm.nih.gov/genomes/all/GCA/003/940/475/GCA_003940475.1_ASM394047v1	Unknown	blank	Homo sapiens
Acinetobacter_junii_CIP_107470__MTCC_11364	Acinetobacter_junii_CIP_64.5	97.4528	Acinetobacter junii	GCA_000368665.1	https://ftp.ncbi.nlm.nih.gov/genomes/all/GCA/000/368/665/GCA_000368665.1_Acin_grim_CIP_107470_V1	blank	blank	blank
Acinetobacter_indicus_DFZJA80-1	Acinetobacter_indicus_CIP_110367	97.4533	Acinetobacter indicus	GCA_004005545.1	https://ftp.ncbi.nlm.nih.gov/genomes/all/GCA/004/005/545/GCA_004005545.1_ASM400554v1	feces	China: Zhejiang	blank
Acinetobacter_baumannii_CRE341	Acinetobacter_baumannii_ATCC_19606	97.4538	Acinetobacter baumannii	GCA_018105965.1	https://ftp.ncbi.nlm.nih.gov/genomes/all/GCA/018/105/965/GCA_018105965.1_ASM1810596v1	urine	Malaysia: Kuala Lumpur	Homo sapiens
Acinetobacter_baumannii_SP500	Acinetobacter_baumannii_CIP_70.34	97.4539	Acinetobacter baumannii	GCA_011601725.1	https://ftp.ncbi.nlm.nih.gov/genomes/all/GCA/011/601/725/GCA_011601725.1_ASM1160172v1	Endotracheal Aspirate	India: Vellore	Homo sapiens
Acinetobacter_baumannii_AMA33	Acinetobacter_baumannii_DSM_30007	97.4542	Acinetobacter baumannii	GCA_009645675.1	https://ftp.ncbi.nlm.nih.gov/genomes/all/GCA/009/645/675/GCA_009645675.1_ASM964567v1	blank	blank	Homo sapiens
Acinetobacter_pittii_FDAARGOS_1397	Acinetobacter_lactucae_NRRL_B-41902	97.4543	Acinetobacter lactucae	GCA_019047185.1	https://ftp.ncbi.nlm.nih.gov/genomes/all/GCA/019/047/185/GCA_019047185.1_ASM1904718v1	blank	Germany: Braunschweig	blank
Acinetobacter_guillouiae_PgBE136	Acinetobacter_guillouiae_CIP_63.46	97.4545	Acinetobacter guillouiae	GCA_020172725.1	https://ftp.ncbi.nlm.nih.gov/genomes/all/GCA/020/172/725/GCA_020172725.1_ASM2017272v1	blank	South Korea	Panax ginseng
Acinetobacter_ursingii_UBA2310	Acinetobacter_ursingii_DSM_16037	97.4563	Acinetobacter ursingii	GCA_002345755.1	https://ftp.ncbi.nlm.nih.gov/genomes/all/GCA/002/345/755/GCA_002345755.1_ASM234575v1	terrestrial	USA:New York City	blank
Acinetobacter_sp._UBA2581	Acinetobacter_variabilis_NIPH_2171	97.4563	Acinetobacter variabilis	GCA_002339435.1	https://ftp.ncbi.nlm.nih.gov/genomes/all/GCA/002/339/435/GCA_002339435.1_ASM233943v1	metal	USA:New York City	blank
Acinetobacter_baumannii_AB2828	Acinetobacter_baumannii_DSM_30007	97.4576	Acinetobacter baumannii	GCA_001611995.1	https://ftp.ncbi.nlm.nih.gov/genomes/all/GCA/001/611/995/GCA_001611995.1_ASM161199v1	blood	USA: Walter Reed Army Medical Center	Homo sapiens
Acinetobacter_baumannii_MRSN22112	Acinetobacter_baumannii_CIP_70.34	97.4584	Acinetobacter baumannii	GCA_006493975.1	https://ftp.ncbi.nlm.nih.gov/genomes/all/GCA/006/493/975/GCA_006493975.1_ASM649397v1	blood	Peru	Homo sapiens
Acinetobacter_baumannii_BA82	Acinetobacter_baumannii_DSM_30007	97.459	Acinetobacter baumannii	GCA_010179525.1	https://ftp.ncbi.nlm.nih.gov/genomes/all/GCA/010/179/525/GCA_010179525.1_ASM1017952v1	blood	India: Vellore	Homo sapiens
Acinetobacter_baumannii_AMA47	Acinetobacter_baumannii_DSM_30007	97.4597	Acinetobacter baumannii	GCA_009645395.1	https://ftp.ncbi.nlm.nih.gov/genomes/all/GCA/009/645/395/GCA_009645395.1_ASM964539v1	blank	blank	Homo sapiens
Acinetobacter_sp._YH1901136	Acinetobacter_towneri_DSM_14962	97.4605	Acinetobacter towneri	GCA_013416945.1	https://ftp.ncbi.nlm.nih.gov/genomes/all/GCA/013/416/945/GCA_013416945.1_ASM1341694v1	feces	China: Guandong	pig
Acinetobacter_baumannii_NBRC_110490	Acinetobacter_baumannii_DSM_30007	97.4614	Acinetobacter baumannii	GCA_000835995.1	https://ftp.ncbi.nlm.nih.gov/genomes/all/GCA/000/835/995/GCA_000835995.1_ASM83599v1	blank	blank	blank
Acinetobacter_baumannii_ARLG1317	Acinetobacter_baumannii_DSM_30007	97.4633	Acinetobacter baumannii	GCA_002143975.1	https://ftp.ncbi.nlm.nih.gov/genomes/all/GCA/002/143/975/GCA_002143975.1_ASM214397v1	blank	blank	blank
Acinetobacter_baumannii_5326	Acinetobacter_baumannii_ATCC_19606	97.4633	Acinetobacter baumannii	GCA_008709595.1	https://ftp.ncbi.nlm.nih.gov/genomes/all/GCA/008/709/595/GCA_008709595.1_AB_5326	blank	India	Homo sapiens
Acinetobacter_indicus_AI19	Acinetobacter_indicus_CIP_110367	97.464	Acinetobacter indicus	GCA_012366715.1	https://ftp.ncbi.nlm.nih.gov/genomes/all/GCA/012/366/715/GCA_012366715.1_ASM1236671v1	cow	China	blank
Acinetobacter_baumannii_TG89548	Acinetobacter_baumannii_ATCC_19606	97.465	Acinetobacter baumannii	GCA_003949335.1	https://ftp.ncbi.nlm.nih.gov/genomes/all/GCA/003/949/335/GCA_003949335.1_ASM394933v1	eye	USA: Arizona	Homo sapiens
Acinetobacter_baumannii_CriePir309	Acinetobacter_baumannii_DSM_30007	97.4663	Acinetobacter baumannii	GCA_016654295.1	https://ftp.ncbi.nlm.nih.gov/genomes/all/GCA/016/654/295/GCA_016654295.1_ASM1665429v1	urine	Russia: Moscow	Homo sapiens
Acinetobacter_ursingii_UBA2065	Acinetobacter_ursingii_DSM_16037	97.4667	Acinetobacter ursingii	GCA_002332885.1	https://ftp.ncbi.nlm.nih.gov/genomes/all/GCA/002/332/885/GCA_002332885.1_ASM233288v1	metal	USA:New York City	blank
Acinetobacter_baumannii_7804	Acinetobacter_baumannii_DSM_30007	97.4674	Acinetobacter baumannii	GCA_003431385.1	https://ftp.ncbi.nlm.nih.gov/genomes/all/GCA/003/431/385/GCA_003431385.1_ASM343138v1	bronchoalveolar lavage fluid	Mexico: Monterrey, Nuevo Leon	Homo sapiens
Acinetobacter_baumannii_AMA9	Acinetobacter_baumannii_ATCC_19606	97.4677	Acinetobacter baumannii	GCA_009645285.1	https://ftp.ncbi.nlm.nih.gov/genomes/all/GCA/009/645/285/GCA_009645285.1_ASM964528v1	blank	blank	Homo sapiens
Acinetobacter_baumannii_AMA31	Acinetobacter_baumannii_JCM_6841	97.4691	Acinetobacter baumannii	GCA_009645685.1	https://ftp.ncbi.nlm.nih.gov/genomes/all/GCA/009/645/685/GCA_009645685.1_ASM964568v1	blank	blank	Homo sapiens
Acinetobacter_indicus_IHIT31231	Acinetobacter_indicus_CIP_110367	97.4691	Acinetobacter indicus	GCA_002938825.1	https://ftp.ncbi.nlm.nih.gov/genomes/all/GCA/002/938/825/GCA_002938825.1_ASM293882v1	blank	Germany	cattle
Acinetobacter_baumannii_AS012541	Acinetobacter_baumannii_DSM_30007	97.4701	Acinetobacter baumannii	GCA_010587125.1	https://ftp.ncbi.nlm.nih.gov/genomes/all/GCA/010/587/125/GCA_010587125.1_ASM1058712v1	lung	USA	Homo sapiens
Acinetobacter_baumannii_AMA16	Acinetobacter_baumannii_ATCC_19606	97.4703	Acinetobacter baumannii	GCA_009645975.1	https://ftp.ncbi.nlm.nih.gov/genomes/all/GCA/009/645/975/GCA_009645975.1_ASM964597v1	blank	blank	Homo sapiens
Acinetobacter_baumannii_R348	Acinetobacter_baumannii_DSM_30007	97.4729	Acinetobacter baumannii	GCA_003955355.1	https://ftp.ncbi.nlm.nih.gov/genomes/all/GCA/003/955/355/GCA_003955355.1_ASM395535v1	blank	blank	blank
Acinetobacter_baumannii_AMA5	Acinetobacter_baumannii_DSM_30007	97.4734	Acinetobacter baumannii	GCA_009645345.1	https://ftp.ncbi.nlm.nih.gov/genomes/all/GCA/009/645/345/GCA_009645345.1_ASM964534v1	blank	blank	Homo sapiens
Acinetobacter_indicus_AI20	Acinetobacter_indicus_CIP_110367	97.474	Acinetobacter indicus	GCA_012366755.1	https://ftp.ncbi.nlm.nih.gov/genomes/all/GCA/012/366/755/GCA_012366755.1_ASM1236675v1	cow	China	blank
Acinetobacter_baumannii_AMA45	Acinetobacter_baumannii_DSM_30007	97.4745	Acinetobacter baumannii	GCA_009645415.1	https://ftp.ncbi.nlm.nih.gov/genomes/all/GCA/009/645/415/GCA_009645415.1_ASM964541v1	blank	blank	Homo sapiens
Acinetobacter_baumannii_AMA40	Acinetobacter_baumannii_DSM_30007	97.4748	Acinetobacter baumannii	GCA_009645505.1	https://ftp.ncbi.nlm.nih.gov/genomes/all/GCA/009/645/505/GCA_009645505.1_ASM964550v1	blank	blank	Homo sapiens
Acinetobacter_baumannii_A-71.198	Acinetobacter_baumannii_JCM_6841	97.4751	Acinetobacter baumannii	GCA_009829555.1	https://ftp.ncbi.nlm.nih.gov/genomes/all/GCA/009/829/555/GCA_009829555.1_ASM982955v1	tracheal secretion	Brazil	Homo sapiens
Acinetobacter_baumannii_1461963	Acinetobacter_baumannii_ATCC_19606	97.4763	Acinetobacter baumannii	GCA_000581155.1	https://ftp.ncbi.nlm.nih.gov/genomes/all/GCA/000/581/155/GCA_000581155.1_ASM58115v1	perirectal	USA	Homo sapiens
Acinetobacter_baumannii_AB3806	Acinetobacter_baumannii_DSM_30007	97.4765	Acinetobacter baumannii	GCA_001612105.1	https://ftp.ncbi.nlm.nih.gov/genomes/all/GCA/001/612/105/GCA_001612105.1_ASM161210v1	Severe Trauma Site	USA: Walter Reed Army Medical Center	Homo sapiens
Acinetobacter_baumannii_AMA41	Acinetobacter_baumannii_DSM_30007	97.477	Acinetobacter baumannii	GCA_009645495.1	https://ftp.ncbi.nlm.nih.gov/genomes/all/GCA/009/645/495/GCA_009645495.1_ASM964549v1	blank	blank	Homo sapiens
Acinetobacter_sp._YZS-X1-1	Acinetobacter_variabilis_NIPH_2171	97.4779	Acinetobacter variabilis	GCA_000804305.1	https://ftp.ncbi.nlm.nih.gov/genomes/all/GCA/000/804/305/GCA_000804305.1_ASM80430v1	environmental	China: Guangzhou	blank
Acinetobacter_baumannii_NBRC_110492	Acinetobacter_baumannii_ATCC_19606	97.4782	Acinetobacter baumannii	GCA_000876075.1	https://ftp.ncbi.nlm.nih.gov/genomes/all/GCA/000/876/075/GCA_000876075.1_ASM87607v1	blank	blank	blank
Acinetobacter_baumannii_PM194229	Acinetobacter_baumannii_ATCC_19606	97.4786	Acinetobacter baumannii	GCA_012935125.1	https://ftp.ncbi.nlm.nih.gov/genomes/all/GCA/012/935/125/GCA_012935125.1_ASM1293512v1	BAL	India	Homo sapiens
Acinetobacter_baumannii_4300STDY7045893	Acinetobacter_baumannii_DSM_30007	97.4789	Acinetobacter baumannii	GCA_900496745.1	https://ftp.ncbi.nlm.nih.gov/genomes/all/GCA/900/496/745/GCA_900496745.1_24276_3_50	blank	blank	blank
Acinetobacter_baumannii_KUSSH14	Acinetobacter_baumannii_DSM_30007	97.4791	Acinetobacter baumannii	GCA_002992565.1	https://ftp.ncbi.nlm.nih.gov/genomes/all/GCA/002/992/565/GCA_002992565.1_ASM299256v1	Tracheal Secretion	Kuwait	Homo sapiens
Acinetobacter_baumannii_TG02017	Acinetobacter_baumannii_ATCC_19606	97.48	Acinetobacter baumannii	GCA_000453605.1	https://ftp.ncbi.nlm.nih.gov/genomes/all/GCA/000/453/605/GCA_000453605.1_ASM45360v1	sputum	blank	Homo sapiens
Acinetobacter_baumannii_KUSSH08	Acinetobacter_baumannii_JCM_6841	97.4803	Acinetobacter baumannii	GCA_002992645.1	https://ftp.ncbi.nlm.nih.gov/genomes/all/GCA/002/992/645/GCA_002992645.1_ASM299264v1	Tracheal Secretion	Kuwait	Homo sapiens
Acinetobacter_baumannii_WP4-W18-ESBL-11	Acinetobacter_baumannii_CIP_70.34	97.4804	Acinetobacter baumannii	GCA_014159355.1	https://ftp.ncbi.nlm.nih.gov/genomes/all/GCA/014/159/355/GCA_014159355.1_ASM1415935v1	wastewater treatment plant effluent	Japan:Tokyo	blank
Acinetobacter_baumannii_A424	Acinetobacter_baumannii_DSM_30007	97.4806	Acinetobacter baumannii	GCA_003185755.1	https://ftp.ncbi.nlm.nih.gov/genomes/all/GCA/003/185/755/GCA_003185755.1_ASM318575v1	blank	Croatia	Homo sapiens
Acinetobacter_baumannii_916_16	Acinetobacter_baumannii_DSM_30007	97.4806	Acinetobacter baumannii	GCA_015538155.1	https://ftp.ncbi.nlm.nih.gov/genomes/all/GCA/015/538/155/GCA_015538155.1_ASM1553815v1	Bone fragment	Brazil: Vitoria	Homo sapiens
Acinetobacter_ursingii_TUM15280	Acinetobacter_ursingii_DSM_16037	97.4807	Acinetobacter ursingii	GCA_008994615.1	https://ftp.ncbi.nlm.nih.gov/genomes/all/GCA/008/994/615/GCA_008994615.1_ASM899461v1	human sputum	Japan:Tokyo	Homo sapiens
Acinetobacter_nosocomialis_UBA1588	Acinetobacter_nosocomialis_LMG_10619	97.4812	Acinetobacter nosocomialis	GCA_002322145.1	https://ftp.ncbi.nlm.nih.gov/genomes/all/GCA/002/322/145/GCA_002322145.1_ASM232214v1	metal	USA:New York City	blank
Acinetobacter_baumannii_AMA17	Acinetobacter_baumannii_DSM_30007	97.4836	Acinetobacter baumannii	GCA_009645905.1	https://ftp.ncbi.nlm.nih.gov/genomes/all/GCA/009/645/905/GCA_009645905.1_ASM964590v1	blank	blank	Homo sapiens
Acinetobacter_baumannii_4300STDY7045824	Acinetobacter_baumannii_DSM_30007	97.484	Acinetobacter baumannii	GCA_900496095.1	https://ftp.ncbi.nlm.nih.gov/genomes/all/GCA/900/496/095/GCA_900496095.1_24276_2_289	blank	blank	blank
Acinetobacter_baumannii_161_07	Acinetobacter_baumannii_DSM_30007	97.4842	Acinetobacter baumannii	GCA_001007815.1	https://ftp.ncbi.nlm.nih.gov/genomes/all/GCA/001/007/815/GCA_001007815.1_ASM100781v1	respiratory tract	Germany	Homo sapiens
Acinetobacter_baumannii_E-072658	Acinetobacter_baumannii_ATCC_19606	97.4848	Acinetobacter baumannii	GCA_019903235.1	https://ftp.ncbi.nlm.nih.gov/genomes/all/GCA/019/903/235/GCA_019903235.1_ASM1990323v1	paper pulp mill	Finland	blank
Acinetobacter_baumannii_Ab121	Acinetobacter_baumannii_DSM_30007	97.485	Acinetobacter baumannii	GCA_900476735.2	https://ftp.ncbi.nlm.nih.gov/genomes/all/GCA/900/476/735/GCA_900476735.2_9179_4_1	blank	blank	blank
Acinetobacter_baumannii_AMA26	Acinetobacter_baumannii_DSM_30007	97.4864	Acinetobacter baumannii	GCA_009645825.1	https://ftp.ncbi.nlm.nih.gov/genomes/all/GCA/009/645/825/GCA_009645825.1_ASM964582v1	blank	blank	Homo sapiens
Acinetobacter_baumannii_SP1713	Acinetobacter_baumannii_DSM_30007	97.4879	Acinetobacter baumannii	GCA_010500175.1	https://ftp.ncbi.nlm.nih.gov/genomes/all/GCA/010/500/175/GCA_010500175.1_ASM1050017v1	Endotracheal Aspirate	India: Vellore	Homo sapiens
Acinetobacter_baumannii_121	Acinetobacter_baumannii_CIP_70.34	97.4883	Acinetobacter baumannii	GCA_018361325.1	https://ftp.ncbi.nlm.nih.gov/genomes/all/GCA/018/361/325/GCA_018361325.1_ASM1836132v1	hospital wastewater	South Africa	blank
Acinetobacter_baumannii_CriePir298	Acinetobacter_baumannii_ATCC_19606	97.4885	Acinetobacter baumannii	GCA_016654165.1	https://ftp.ncbi.nlm.nih.gov/genomes/all/GCA/016/654/165/GCA_016654165.1_ASM1665416v1	urine	Russia: Moscow	Homo sapiens
Acinetobacter_baumannii_Ab04-mff	Acinetobacter_baumannii_JCM_6841	97.4891	Acinetobacter baumannii	GCA_001077655.1	https://ftp.ncbi.nlm.nih.gov/genomes/all/GCA/001/077/655/GCA_001077655.1_ASM107765v1	blood	Canada: Edmonton	Homo sapiens
Acinetobacter_baumannii_AMA19	Acinetobacter_baumannii_DSM_30007	97.4892	Acinetobacter baumannii	GCA_009645925.1	https://ftp.ncbi.nlm.nih.gov/genomes/all/GCA/009/645/925/GCA_009645925.1_ASM964592v1	blank	blank	Homo sapiens
Acinetobacter_baumannii_AS012542	Acinetobacter_baumannii_DSM_30007	97.4897	Acinetobacter baumannii	GCA_010587045.1	https://ftp.ncbi.nlm.nih.gov/genomes/all/GCA/010/587/045/GCA_010587045.1_ASM1058704v1	lung	USA	Homo sapiens
Acinetobacter_lactucae_QL-1	Acinetobacter_lactucae_NRRL_B-41902	97.4897	Acinetobacter lactucae	GCA_013122135.1	https://ftp.ncbi.nlm.nih.gov/genomes/all/GCA/013/122/135/GCA_013122135.1_ASM1312213v1	Rice root soil in experimental field of South China Agricultural University	China: experimental field of South China Agricultural University	blank
Acinetobacter_baumannii_AMA30	Acinetobacter_baumannii_DSM_30007	97.4899	Acinetobacter baumannii	GCA_009645705.1	https://ftp.ncbi.nlm.nih.gov/genomes/all/GCA/009/645/705/GCA_009645705.1_ASM964570v1	blank	blank	Homo sapiens
Acinetobacter_baumannii_4300STDY7045795	Acinetobacter_baumannii_DSM_30007	97.4911	Acinetobacter baumannii	GCA_900495645.1	https://ftp.ncbi.nlm.nih.gov/genomes/all/GCA/900/495/645/GCA_900495645.1_24276_2_260	blank	blank	blank
Acinetobacter_baumannii_14A626	Acinetobacter_baumannii_DSM_30007	97.4915	Acinetobacter baumannii	GCA_020255585.1	https://ftp.ncbi.nlm.nih.gov/genomes/all/GCA/020/255/585/GCA_020255585.1_ASM2025558v1	blood	France: Besancon	Homo sapiens
Acinetobacter_baumannii_MRSN32892	Acinetobacter_baumannii_ATCC_19606	97.4918	Acinetobacter baumannii	GCA_006492425.1	https://ftp.ncbi.nlm.nih.gov/genomes/all/GCA/006/492/425/GCA_006492425.1_ASM649242v1	groin	Germany	Homo sapiens
Acinetobacter_baumannii_DETAB-P2	Acinetobacter_baumannii_DSM_30007	97.4919	Acinetobacter baumannii	GCA_014322245.1	https://ftp.ncbi.nlm.nih.gov/genomes/all/GCA/014/322/245/GCA_014322245.1_ASM1432224v1	rectal swab	China:Hangzhou	Homo sapiens
Acinetobacter_sp._YH16050	Acinetobacter_towneri_DSM_14962	97.4926	Acinetobacter towneri	GCA_013417165.1	https://ftp.ncbi.nlm.nih.gov/genomes/all/GCA/013/417/165/GCA_013417165.1_ASM1341716v1	sewage	China: Hunan	blank
Acinetobacter_baumannii_MC14	Acinetobacter_baumannii_DSM_30007	97.493	Acinetobacter baumannii	GCA_003596235.1	https://ftp.ncbi.nlm.nih.gov/genomes/all/GCA/003/596/235/GCA_003596235.1_ASM359623v1	Blood Culture	Bolivia: Cochabamba	Homo sapiens
Acinetobacter_baumannii_AMA14	Acinetobacter_baumannii_DSM_30007	97.4933	Acinetobacter baumannii	GCA_009645995.1	https://ftp.ncbi.nlm.nih.gov/genomes/all/GCA/009/645/995/GCA_009645995.1_ASM964599v1	blank	blank	Homo sapiens
Acinetobacter_ursingii_NBRC_110605	Acinetobacter_ursingii_DSM_16037	97.4938	Acinetobacter ursingii	GCA_000949835.1	https://ftp.ncbi.nlm.nih.gov/genomes/all/GCA/000/949/835/GCA_000949835.1_ASM94983v1	blank	blank	blank
Acinetobacter_baumannii_4300STDY7045751	Acinetobacter_baumannii_DSM_30007	97.4944	Acinetobacter baumannii	GCA_900495405.1	https://ftp.ncbi.nlm.nih.gov/genomes/all/GCA/900/495/405/GCA_900495405.1_24276_2_217	blank	blank	blank
Acinetobacter_baumannii_va17061857	Acinetobacter_baumannii_DSM_30007	97.4944	Acinetobacter baumannii	GCA_018420315.1	https://ftp.ncbi.nlm.nih.gov/genomes/all/GCA/018/420/315/GCA_018420315.1_ASM1842031v1	Wound swab	Germany	Homo sapiens
Acinetobacter_lactucae_CI78	Acinetobacter_lactucae_NRRL_B-41902	97.495	Acinetobacter lactucae	GCA_000516615.2	https://ftp.ncbi.nlm.nih.gov/genomes/all/GCA/000/516/615/GCA_000516615.2_ASM51661v2	respiratory tract	Afghanistan	Homo sapiens
Acinetobacter_sp._YH12112	Acinetobacter_indicus_CIP_110367	97.4951	Acinetobacter indicus	GCA_013418945.1	https://ftp.ncbi.nlm.nih.gov/genomes/all/GCA/013/418/945/GCA_013418945.1_ASM1341894v1	feces	China: Jiangsu	pig
Acinetobacter_baumannii_4300STDY7045802	Acinetobacter_baumannii_DSM_30007	97.4954	Acinetobacter baumannii	GCA_900495835.1	https://ftp.ncbi.nlm.nih.gov/genomes/all/GCA/900/495/835/GCA_900495835.1_24276_2_267	blank	blank	blank
Acinetobacter_baumannii_AMA34	Acinetobacter_baumannii_DSM_30007	97.4962	Acinetobacter baumannii	GCA_009645645.1	https://ftp.ncbi.nlm.nih.gov/genomes/all/GCA/009/645/645/GCA_009645645.1_ASM964564v1	blank	blank	Homo sapiens
Acinetobacter_sp._YH12127	Acinetobacter_towneri_DSM_14962	97.4964	Acinetobacter towneri	GCA_013418695.1	https://ftp.ncbi.nlm.nih.gov/genomes/all/GCA/013/418/695/GCA_013418695.1_ASM1341869v1	feces	China: Hainan	pig
Acinetobacter_indicus_AI29	Acinetobacter_indicus_CIP_110367	97.4966	Acinetobacter indicus	GCA_012371035.1	https://ftp.ncbi.nlm.nih.gov/genomes/all/GCA/012/371/035/GCA_012371035.1_ASM1237103v1	cow	China	blank
Acinetobacter_baumannii_4300STDY7045840	Acinetobacter_baumannii_DSM_30007	97.4972	Acinetobacter baumannii	GCA_900496325.1	https://ftp.ncbi.nlm.nih.gov/genomes/all/GCA/900/496/325/GCA_900496325.1_24276_2_305	blank	blank	blank
Acinetobacter_sp._YH12119	Acinetobacter_indicus_CIP_110367	97.4983	Acinetobacter indicus	GCA_013418855.1	https://ftp.ncbi.nlm.nih.gov/genomes/all/GCA/013/418/855/GCA_013418855.1_ASM1341885v1	feces	China: Jiangsu	pig
Acinetobacter_junii_SC22	Acinetobacter_junii_CIP_64.5	97.4983	Acinetobacter junii	GCA_003293755.1	https://ftp.ncbi.nlm.nih.gov/genomes/all/GCA/003/293/755/GCA_003293755.1_ASM329375v1	metal rich soil from gold mine	China	blank
Acinetobacter_baumannii_Survcare223	Acinetobacter_baumannii_DSM_30007	97.4984	Acinetobacter baumannii	GCA_018441385.1	https://ftp.ncbi.nlm.nih.gov/genomes/all/GCA/018/441/385/GCA_018441385.1_ASM1844138v1	Rectal swab/stool	Germany	Homo sapiens
Acinetobacter_pseudolwoffii_XMC5X702	Acinetobacter_pseudolwoffii_ANC_5044	97.4998	Acinetobacter pseudolwoffii	GCA_020271765.1	https://ftp.ncbi.nlm.nih.gov/genomes/all/GCA/020/271/765/GCA_020271765.1_ASM2027176v1	a feces sample of chicken origin	China: Nantong, jiangsu province	blank
Acinetobacter_baumannii_4300STDY7045786	Acinetobacter_baumannii_DSM_30007	97.5003	Acinetobacter baumannii	GCA_900495735.1	https://ftp.ncbi.nlm.nih.gov/genomes/all/GCA/900/495/735/GCA_900495735.1_24276_2_251	blank	blank	blank
Acinetobacter_baumannii_PR350	Acinetobacter_baumannii_DSM_30007	97.5015	Acinetobacter baumannii	GCA_002137945.1	https://ftp.ncbi.nlm.nih.gov/genomes/all/GCA/002/137/945/GCA_002137945.1_ASM213794v1	blank	blank	blank
Acinetobacter_baumannii_AMA39	Acinetobacter_baumannii_JCM_6841	97.5024	Acinetobacter baumannii	GCA_009645575.1	https://ftp.ncbi.nlm.nih.gov/genomes/all/GCA/009/645/575/GCA_009645575.1_ASM964557v1	blank	blank	Homo sapiens
Acinetobacter_baumannii_DR1	Acinetobacter_baumannii_DSM_30007	97.5025	Acinetobacter baumannii	GCA_002265555.1	https://ftp.ncbi.nlm.nih.gov/genomes/all/GCA/002/265/555/GCA_002265555.1_ASM226555v1	Biological	India	Homo sapiens
Acinetobacter_nosocomialis_PR365	Acinetobacter_nosocomialis_NIPH_2119	97.5038	Acinetobacter nosocomialis	GCA_002137075.1	https://ftp.ncbi.nlm.nih.gov/genomes/all/GCA/002/137/075/GCA_002137075.1_ASM213707v1	blank	blank	blank
Acinetobacter_baumannii_MRSN24603	Acinetobacter_baumannii_DSM_30007	97.5045	Acinetobacter baumannii	GCA_006493875.1	https://ftp.ncbi.nlm.nih.gov/genomes/all/GCA/006/493/875/GCA_006493875.1_ASM649387v1	blood	Germany	Homo sapiens
Acinetobacter_baumannii_AMA37	Acinetobacter_baumannii_JCM_6841	97.5058	Acinetobacter baumannii	GCA_009645635.1	https://ftp.ncbi.nlm.nih.gov/genomes/all/GCA/009/645/635/GCA_009645635.1_ASM964563v1	blank	blank	Homo sapiens
Acinetobacter_sp._YH12156	Acinetobacter_pseudolwoffii_ANC_5044	97.506	Acinetobacter pseudolwoffii	GCA_013418235.1	https://ftp.ncbi.nlm.nih.gov/genomes/all/GCA/013/418/235/GCA_013418235.1_ASM1341823v1	feces	China: Zhejiang	pig
Acinetobacter_ursingii_OCU_Ac4	Acinetobacter_ursingii_DSM_16037	97.5066	Acinetobacter ursingii	GCA_003569495.1	https://ftp.ncbi.nlm.nih.gov/genomes/all/GCA/003/569/495/GCA_003569495.1_ASM356949v1	blood culture of a hospitalized patient	Japan:Osaka	Homo sapiens
Acinetobacter_baumannii_AMA35	Acinetobacter_baumannii_DSM_30007	97.5068	Acinetobacter baumannii	GCA_009645605.1	https://ftp.ncbi.nlm.nih.gov/genomes/all/GCA/009/645/605/GCA_009645605.1_ASM964560v1	blank	blank	Homo sapiens
Acinetobacter_baumannii_AMA18	Acinetobacter_baumannii_DSM_30007	97.5068	Acinetobacter baumannii	GCA_009645915.1	https://ftp.ncbi.nlm.nih.gov/genomes/all/GCA/009/645/915/GCA_009645915.1_ASM964591v1	blank	blank	Homo sapiens
Acinetobacter_ursingii_TUM15411	Acinetobacter_ursingii_DSM_16037	97.5071	Acinetobacter ursingii	GCA_009004235.1	https://ftp.ncbi.nlm.nih.gov/genomes/all/GCA/009/004/235/GCA_009004235.1_ASM900423v1	human blood	Japan:Tokyo	Homo sapiens
Acinetobacter_baumannii_AMA24	Acinetobacter_baumannii_JCM_6841	97.5073	Acinetobacter baumannii	GCA_009645775.1	https://ftp.ncbi.nlm.nih.gov/genomes/all/GCA/009/645/775/GCA_009645775.1_ASM964577v1	blank	blank	Homo sapiens
Acinetobacter_venetianus_TUST-DM21	Acinetobacter_venetianus_RAG-1	97.5074	Acinetobacter venetianus	GCA_014250455.1	https://ftp.ncbi.nlm.nih.gov/genomes/all/GCA/014/250/455/GCA_014250455.1_ASM1425045v1	oil	China: Tianjin	blank
Acinetobacter_nosocomialis_ACIN00166	Acinetobacter_nosocomialis_NIPH_2119	97.5084	Acinetobacter nosocomialis	GCA_016508485.1	https://ftp.ncbi.nlm.nih.gov/genomes/all/GCA/016/508/485/GCA_016508485.1_ASM1650848v1	sputum	USA: Pittsburgh, Pennsylvania	Homo sapiens
Acinetobacter_sp._ANC_5347	Acinetobacter_pseudolwoffii_ANC_5044	97.51	Acinetobacter pseudolwoffii	GCA_002797235.1	https://ftp.ncbi.nlm.nih.gov/genomes/all/GCA/002/797/235/GCA_002797235.1_ASM279723v1	rectum	Czech Republic: Ivanovice na Hane	guinea pig
Acinetobacter_baumannii_DS002	Acinetobacter_baumannii_ATCC_19606	97.5103	Acinetobacter baumannii	GCA_003012895.3	https://ftp.ncbi.nlm.nih.gov/genomes/all/GCA/003/012/895/GCA_003012895.3_ASM301289v3	soil	India: Anantpur, Andhra Pradesh	blank
Acinetobacter_baumannii_AMA25	Acinetobacter_baumannii_DSM_30007	97.511	Acinetobacter baumannii	GCA_009645805.1	https://ftp.ncbi.nlm.nih.gov/genomes/all/GCA/009/645/805/GCA_009645805.1_ASM964580v1	blank	blank	Homo sapiens
Acinetobacter_baumannii_MRSN480561	Acinetobacter_baumannii_JCM_6841	97.5111	Acinetobacter baumannii	GCA_006492265.1	https://ftp.ncbi.nlm.nih.gov/genomes/all/GCA/006/492/265/GCA_006492265.1_ASM649226v1	respiratory	Afghanistan	Homo sapiens
Acinetobacter_indicus_AI26	Acinetobacter_indicus_CIP_110367	97.5112	Acinetobacter indicus	GCA_012371095.1	https://ftp.ncbi.nlm.nih.gov/genomes/all/GCA/012/371/095/GCA_012371095.1_ASM1237109v1	cow	China	blank
Acinetobacter_ursingii_TUM15502	Acinetobacter_ursingii_DSM_16037	97.5115	Acinetobacter ursingii	GCA_009012765.1	https://ftp.ncbi.nlm.nih.gov/genomes/all/GCA/009/012/765/GCA_009012765.1_ASM901276v1	human blood	Japan:Tochigi	Homo sapiens
Acinetobacter_baumannii_886_16	Acinetobacter_baumannii_DSM_30007	97.5118	Acinetobacter baumannii	GCA_015537035.1	https://ftp.ncbi.nlm.nih.gov/genomes/all/GCA/015/537/035/GCA_015537035.1_ASM1553703v1	Surgical wound	Brazil: Sao Paulo	Homo sapiens
Acinetobacter_venetianus_JKSF06	Acinetobacter_venetianus_RAG-1	97.5121	Acinetobacter venetianus	GCA_001575095.1	https://ftp.ncbi.nlm.nih.gov/genomes/all/GCA/001/575/095/GCA_001575095.1_ASM157509v1	sediment	USA: San Jacinto River sediment in Houston, Texas	blank
Acinetobacter_baumannii_SP3155	Acinetobacter_baumannii_DSM_30007	97.5123	Acinetobacter baumannii	GCA_010499735.1	https://ftp.ncbi.nlm.nih.gov/genomes/all/GCA/010/499/735/GCA_010499735.1_ASM1049973v1	Endotracheal Aspirate	India: Vellore	Homo sapiens
Acinetobacter_baumannii_16A1524	Acinetobacter_baumannii_DSM_30007	97.5127	Acinetobacter baumannii	GCA_020255345.1	https://ftp.ncbi.nlm.nih.gov/genomes/all/GCA/020/255/345/GCA_020255345.1_ASM2025534v1	Rectal swab	France: Besancon	Homo sapiens
Acinetobacter_baumannii_600_16	Acinetobacter_baumannii_DSM_30007	97.5128	Acinetobacter baumannii	GCA_015537485.1	https://ftp.ncbi.nlm.nih.gov/genomes/all/GCA/015/537/485/GCA_015537485.1_ASM1553748v1	Catheter tip	Brazil: Sao Paulo	Homo sapiens
Acinetobacter_baumannii_AMA36	Acinetobacter_baumannii_ATCC_19606	97.5129	Acinetobacter baumannii	GCA_009645595.1	https://ftp.ncbi.nlm.nih.gov/genomes/all/GCA/009/645/595/GCA_009645595.1_ASM964559v1	blank	blank	Homo sapiens
Acinetobacter_baumannii_AMA12	Acinetobacter_baumannii_JCM_6841	97.5134	Acinetobacter baumannii	GCA_009646005.1	https://ftp.ncbi.nlm.nih.gov/genomes/all/GCA/009/646/005/GCA_009646005.1_ASM964600v1	blank	blank	Homo sapiens
Acinetobacter_baumannii_ARLG1323	Acinetobacter_baumannii_DSM_30007	97.5135	Acinetobacter baumannii	GCA_002143855.1	https://ftp.ncbi.nlm.nih.gov/genomes/all/GCA/002/143/855/GCA_002143855.1_ASM214385v1	blank	blank	blank
Acinetobacter_baumannii_Ab804	Acinetobacter_baumannii_CIP_70.34	97.5145	Acinetobacter baumannii	GCA_002922935.1	https://ftp.ncbi.nlm.nih.gov/genomes/all/GCA/002/922/935/GCA_002922935.1_ASM292293v1	Catheter tip	Brazil	Homo sapiens
Acinetobacter_baumannii_AB3638	Acinetobacter_baumannii_DSM_30007	97.5152	Acinetobacter baumannii	GCA_001612095.1	https://ftp.ncbi.nlm.nih.gov/genomes/all/GCA/001/612/095/GCA_001612095.1_ASM161209v1	Severe Trauma Site	USA: Walter Reed Army Medical Center	Homo sapiens
Acinetobacter_baumannii_ZQ4	Acinetobacter_baumannii_ATCC_19606	97.5152	Acinetobacter baumannii	GCA_002837945.2	https://ftp.ncbi.nlm.nih.gov/genomes/all/GCA/002/837/945/GCA_002837945.2_ASM283794v2	blood	Iraq: Baghdad	Homo sapiens
Acinetobacter_pittii_FDAARGOS_1217	Acinetobacter_pittii_DSM_25618	97.5156	Acinetobacter pittii	GCA_016889305.1	https://ftp.ncbi.nlm.nih.gov/genomes/all/GCA/016/889/305/GCA_016889305.1_ASM1688930v1	blank	Germany: Braunschweig	blank
Acinetobacter_baumannii_ZQ9	Acinetobacter_baumannii_DSM_30007	97.5158	Acinetobacter baumannii	GCA_002837885.3	https://ftp.ncbi.nlm.nih.gov/genomes/all/GCA/002/837/885/GCA_002837885.3_ASM283788v3	blood	Iraq: Baghdad	Homo sapiens
Acinetobacter_baumannii_Aci00860	Acinetobacter_baumannii_ATCC_19606	97.5163	Acinetobacter baumannii	GCA_005819365.1	https://ftp.ncbi.nlm.nih.gov/genomes/all/GCA/005/819/365/GCA_005819365.1_ASM581936v1	tracheal secretion	Germany: Heidelberg	Homo sapiens
Acinetobacter_ursingii_TUM15501	Acinetobacter_ursingii_DSM_16037	97.5178	Acinetobacter ursingii	GCA_009012695.1	https://ftp.ncbi.nlm.nih.gov/genomes/all/GCA/009/012/695/GCA_009012695.1_ASM901269v1	human blood	Japan:Tochigi	Homo sapiens
Acinetobacter_baumannii_BA14629	Acinetobacter_baumannii_DSM_30007	97.5178	Acinetobacter baumannii	GCA_010179145.1	https://ftp.ncbi.nlm.nih.gov/genomes/all/GCA/010/179/145/GCA_010179145.1_ASM1017914v1	blood	India: Vellore	Homo sapiens
Acinetobacter_ursingii_UBA3890	Acinetobacter_ursingii_DSM_16037	97.5192	Acinetobacter ursingii	GCA_002391885.1	https://ftp.ncbi.nlm.nih.gov/genomes/all/GCA/002/391/885/GCA_002391885.1_ASM239188v1	metal	USA:New York City	blank
Acinetobacter_baumannii_UBA4598	Acinetobacter_baumannii_DSM_30007	97.5194	Acinetobacter baumannii	GCA_002386695.1	https://ftp.ncbi.nlm.nih.gov/genomes/all/GCA/002/386/695/GCA_002386695.1_ASM238669v1	wood	USA:New York City	blank
Acinetobacter_baumannii_AMA28	Acinetobacter_baumannii_DSM_30007	97.5201	Acinetobacter baumannii	GCA_009645815.1	https://ftp.ncbi.nlm.nih.gov/genomes/all/GCA/009/645/815/GCA_009645815.1_ASM964581v1	blank	blank	Homo sapiens
Acinetobacter_baumannii_A15	Acinetobacter_baumannii_ATCC_19606	97.5203	Acinetobacter baumannii	GCA_014531345.1	https://ftp.ncbi.nlm.nih.gov/genomes/all/GCA/014/531/345/GCA_014531345.1_ASM1453134v1	blank	Egypt: Alexandria	Homo sapiens
Acinetobacter_ursingii_TG29426	Acinetobacter_ursingii_DSM_16037	97.5223	Acinetobacter ursingii	GCA_003947785.1	https://ftp.ncbi.nlm.nih.gov/genomes/all/GCA/003/947/785/GCA_003947785.1_ASM394778v1	wound	USA: Arizona	Homo sapiens
Acinetobacter_pittii_DE0027	Acinetobacter_pittii_ATCC_19004	97.5227	Acinetobacter pittii	GCA_007680445.1	https://ftp.ncbi.nlm.nih.gov/genomes/all/GCA/007/680/445/GCA_007680445.1_ASM768044v1	environmental	USA: North Carolina, Durham	blank
Acinetobacter_pittii_NBRC_110508	Acinetobacter_pittii_ATCC_19004	97.5227	Acinetobacter pittii	GCA_000931915.1	https://ftp.ncbi.nlm.nih.gov/genomes/all/GCA/000/931/915/GCA_000931915.1_ASM93191v1	blank	blank	blank
Acinetobacter_baumannii_16A1365	Acinetobacter_baumannii_DSM_30007	97.5231	Acinetobacter baumannii	GCA_020254705.1	https://ftp.ncbi.nlm.nih.gov/genomes/all/GCA/020/254/705/GCA_020254705.1_ASM2025470v1	blood	France: Besancon	Homo sapiens
Acinetobacter_indicus_AI8	Acinetobacter_indicus_CIP_110367	97.5236	Acinetobacter indicus	GCA_012366885.1	https://ftp.ncbi.nlm.nih.gov/genomes/all/GCA/012/366/885/GCA_012366885.1_ASM1236688v1	cow	China	blank
Acinetobacter_baumannii_AMA13	Acinetobacter_baumannii_ATCC_19606	97.5239	Acinetobacter baumannii	GCA_009646015.1	https://ftp.ncbi.nlm.nih.gov/genomes/all/GCA/009/646/015/GCA_009646015.1_ASM964601v1	blank	blank	Homo sapiens
Acinetobacter_baumannii_HEU3	Acinetobacter_baumannii_DSM_30007	97.524	Acinetobacter baumannii	GCA_002927855.1	https://ftp.ncbi.nlm.nih.gov/genomes/all/GCA/002/927/855/GCA_002927855.1_ASM292785v1	Cornea secretion	Honduras: Francisco Morazan, Tegucigalpa	Homo sapiens
Acinetobacter_baumannii_276_17	Acinetobacter_baumannii_ATCC_19606	97.5251	Acinetobacter baumannii	GCA_015537825.1	https://ftp.ncbi.nlm.nih.gov/genomes/all/GCA/015/537/825/GCA_015537825.1_ASM1553782v1	cerebrospinal fluid	Brazil: Sorocaba	Homo sapiens
Acinetobacter_baumannii_MC8	Acinetobacter_baumannii_JCM_6841	97.5256	Acinetobacter baumannii	GCA_003596025.1	https://ftp.ncbi.nlm.nih.gov/genomes/all/GCA/003/596/025/GCA_003596025.1_ASM359602v1	Tracheal Secretion	Bolivia: Cochabamba	Homo sapiens
Acinetobacter_baumannii_GTC_03322	Acinetobacter_baumannii_ATCC_19606	97.5263	Acinetobacter baumannii	GCA_000760395.1	https://ftp.ncbi.nlm.nih.gov/genomes/all/GCA/000/760/395/GCA_000760395.1_ASM76039v1	blank	blank	blank
Acinetobacter_baumannii_SCPM-O-B-8559_3239	Acinetobacter_baumannii_CIP_70.34	97.5264	Acinetobacter baumannii	GCA_004912235.1	https://ftp.ncbi.nlm.nih.gov/genomes/all/GCA/004/912/235/GCA_004912235.1_ASM491223v1	sputum	Russia: Northern region of Western Siberia	Homo sapiens
Acinetobacter_baumannii_MRSN15084	Acinetobacter_baumannii_CIP_70.34	97.5268	Acinetobacter baumannii	GCA_001441565.1	https://ftp.ncbi.nlm.nih.gov/genomes/all/GCA/001/441/565/GCA_001441565.1_ASM144156v1	sterile tissue of foot	USA: Washington, DC	Homo sapiens
Acinetobacter_baumannii_29282	Acinetobacter_baumannii_ATCC_19606	97.5269	Acinetobacter baumannii	GCA_008709675.1	https://ftp.ncbi.nlm.nih.gov/genomes/all/GCA/008/709/675/GCA_008709675.1_AB29282	blank	India	Homo sapiens
Acinetobacter_indicus_AI10	Acinetobacter_indicus_CIP_110367	97.5273	Acinetobacter indicus	GCA_012371195.1	https://ftp.ncbi.nlm.nih.gov/genomes/all/GCA/012/371/195/GCA_012371195.1_ASM1237119v1	cow	China	blank
Acinetobacter_baumannii_AMA6	Acinetobacter_baumannii_DSM_30007	97.5283	Acinetobacter baumannii	GCA_009645335.1	https://ftp.ncbi.nlm.nih.gov/genomes/all/GCA/009/645/335/GCA_009645335.1_ASM964533v1	blank	blank	Homo sapiens
Acinetobacter_baumannii_ARLG1941	Acinetobacter_baumannii_DSM_30007	97.5289	Acinetobacter baumannii	GCA_002144835.1	https://ftp.ncbi.nlm.nih.gov/genomes/all/GCA/002/144/835/GCA_002144835.1_ASM214483v1	blank	blank	blank
Acinetobacter_baumannii_C1T1-1	Acinetobacter_baumannii_DSM_30007	97.5299	Acinetobacter baumannii	GCA_004153295.1	https://ftp.ncbi.nlm.nih.gov/genomes/all/GCA/004/153/295/GCA_004153295.1_ASM415329v1	manure	Canada: Sherbrooke	Bos taurus
Acinetobacter_baumannii_MC29	Acinetobacter_baumannii_DSM_30007	97.5308	Acinetobacter baumannii	GCA_003584485.1	https://ftp.ncbi.nlm.nih.gov/genomes/all/GCA/003/584/485/GCA_003584485.1_ASM358448v1	Urine Culture	Bolivia: Cochabamba	Homo sapiens
Acinetobacter_baumannii_NBRC_110491	Acinetobacter_baumannii_ATCC_19606	97.531	Acinetobacter baumannii	GCA_000876055.1	https://ftp.ncbi.nlm.nih.gov/genomes/all/GCA/000/876/055/GCA_000876055.1_ASM87605v1	blank	blank	blank
Acinetobacter_junii_UBA2147	Acinetobacter_junii_CIP_64.5	97.531	Acinetobacter junii	GCA_002328335.1	https://ftp.ncbi.nlm.nih.gov/genomes/all/GCA/002/328/335/GCA_002328335.1_ASM232833v1	freshwater	blank	blank
Acinetobacter_baumannii_GTC_03323	Acinetobacter_baumannii_ATCC_19606	97.532	Acinetobacter baumannii	GCA_000760415.1	https://ftp.ncbi.nlm.nih.gov/genomes/all/GCA/000/760/415/GCA_000760415.1_ASM76041v1	blank	blank	blank
Acinetobacter_baumannii_OIFC143	Acinetobacter_baumannii_DSM_30007	97.5327	Acinetobacter baumannii	GCA_000278665.1	https://ftp.ncbi.nlm.nih.gov/genomes/all/GCA/000/278/665/GCA_000278665.1_AcbauOIFC143v1.0	blank	USA: Walter Reed Army Medical Center, Washington, DC	Homo sapiens
Acinetobacter_ursingii_TUM15523	Acinetobacter_ursingii_DSM_16037	97.5327	Acinetobacter ursingii	GCA_009013335.1	https://ftp.ncbi.nlm.nih.gov/genomes/all/GCA/009/013/335/GCA_009013335.1_ASM901333v1	human blood	Japan:Kanagawa	Homo sapiens
Acinetobacter_baumannii_MRSN7153	Acinetobacter_baumannii_ATCC_19606	97.5328	Acinetobacter baumannii	GCA_006492295.1	https://ftp.ncbi.nlm.nih.gov/genomes/all/GCA/006/492/295/GCA_006492295.1_ASM649229v1	wound	USA	Homo sapiens
Acinetobacter_baumannii_AMA44	Acinetobacter_baumannii_ATCC_19606	97.5332	Acinetobacter baumannii	GCA_009645425.1	https://ftp.ncbi.nlm.nih.gov/genomes/all/GCA/009/645/425/GCA_009645425.1_ASM964542v1	blank	blank	Homo sapiens
Acinetobacter_baumannii_545_16	Acinetobacter_baumannii_DSM_30007	97.5332	Acinetobacter baumannii	GCA_015536865.1	https://ftp.ncbi.nlm.nih.gov/genomes/all/GCA/015/536/865/GCA_015536865.1_ASM1553686v1	blood	Brazil: Sao Paulo	Homo sapiens
Acinetobacter_baumannii_C1T1-2_b	Acinetobacter_baumannii_DSM_30007	97.5334	Acinetobacter baumannii	GCA_004152715.1	https://ftp.ncbi.nlm.nih.gov/genomes/all/GCA/004/152/715/GCA_004152715.1_ASM415271v1	manure	Canada: Sherbrooke	Bos taurus
Acinetobacter_baumannii_IHIT17886	Acinetobacter_baumannii_ATCC_19606	97.5334	Acinetobacter baumannii	GCA_001704675.1	https://ftp.ncbi.nlm.nih.gov/genomes/all/GCA/001/704/675/GCA_001704675.1_ASM170467v1	blank	Germany	dog
Acinetobacter_baumannii_TUM16644	Acinetobacter_baumannii_ATCC_19606	97.5351	Acinetobacter baumannii	GCA_008581715.1	https://ftp.ncbi.nlm.nih.gov/genomes/all/GCA/008/581/715/GCA_008581715.1_ASM858171v1	human blood	Japan	Homo sapiens
Acinetobacter_baumannii_TUMA	Acinetobacter_baumannii_JCM_6841	97.5362	Acinetobacter baumannii	GCA_003240555.1	https://ftp.ncbi.nlm.nih.gov/genomes/all/GCA/003/240/555/GCA_003240555.1_ASM324055v1	blank	France: Tahiti	Homo sapiens
Acinetobacter_baumannii_H31506	Acinetobacter_baumannii_DSM_30007	97.5373	Acinetobacter baumannii	GCA_900157395.1	https://ftp.ncbi.nlm.nih.gov/genomes/all/GCA/900/157/395/GCA_900157395.1_H31506	Clinical	blank	blank
Acinetobacter_baumannii_PR373	Acinetobacter_baumannii_ATCC_19606	97.5374	Acinetobacter baumannii	GCA_002137215.1	https://ftp.ncbi.nlm.nih.gov/genomes/all/GCA/002/137/215/GCA_002137215.1_ASM213721v1	blank	blank	blank
Acinetobacter_baumannii_Aci00718	Acinetobacter_baumannii_DSM_30007	97.5382	Acinetobacter baumannii	GCA_904885815.1	https://ftp.ncbi.nlm.nih.gov/genomes/all/GCA/904/885/815/GCA_904885815.1_Aci00718-181015_contigs_filtered.fa.gz	clinical material	blank	blank
Acinetobacter_baumannii_40288	Acinetobacter_baumannii_DSM_30007	97.5385	Acinetobacter baumannii	GCA_019457715.1	https://ftp.ncbi.nlm.nih.gov/genomes/all/GCA/019/457/715/GCA_019457715.1_ASM1945771v1	urine	France	Canis lupus
Acinetobacter_baumannii_12A070	Acinetobacter_baumannii_DSM_30007	97.5389	Acinetobacter baumannii	GCA_020255445.1	https://ftp.ncbi.nlm.nih.gov/genomes/all/GCA/020/255/445/GCA_020255445.1_ASM2025544v1	blank	France: Besancon	Homo sapiens
Acinetobacter_baumannii_AB-HZ-B75	Acinetobacter_baumannii_DSM_30007	97.5391	Acinetobacter baumannii	GCA_006367395.1	https://ftp.ncbi.nlm.nih.gov/genomes/all/GCA/006/367/395/GCA_006367395.1_ASM636739v1	blood	China: Hangzhou	Homo sapiens
Acinetobacter_baumannii_NBRC_110489	Acinetobacter_baumannii_ATCC_19606	97.5391	Acinetobacter baumannii	GCA_000775875.1	https://ftp.ncbi.nlm.nih.gov/genomes/all/GCA/000/775/875/GCA_000775875.1_ASM77587v1	blank	blank	blank
Acinetobacter_baumannii_MCR10179	Acinetobacter_baumannii_DSM_30007	97.5394	Acinetobacter baumannii	GCA_002927965.1	https://ftp.ncbi.nlm.nih.gov/genomes/all/GCA/002/927/965/GCA_002927965.1_ASM292796v1	Endobronchial tube	Honduras: Cortes, San Pedro Sula	Homo sapiens
Acinetobacter_baumannii_Abau851	Acinetobacter_baumannii_DSM_30007	97.5402	Acinetobacter baumannii	GCA_014334905.1	https://ftp.ncbi.nlm.nih.gov/genomes/all/GCA/014/334/905/GCA_014334905.1_ASM1433490v1	urine	Togo: Lome	Homo sapiens
Acinetobacter_indicus_AI21	Acinetobacter_indicus_CIP_110367	97.5403	Acinetobacter indicus	GCA_012366655.1	https://ftp.ncbi.nlm.nih.gov/genomes/all/GCA/012/366/655/GCA_012366655.1_ASM1236665v1	cow	China	blank
Acinetobacter_baumannii_AB900	Acinetobacter_baumannii_DSM_30007	97.5414	Acinetobacter baumannii	GCA_012037655.1	https://ftp.ncbi.nlm.nih.gov/genomes/all/GCA/012/037/655/GCA_012037655.1_ASM1203765v1	blank	Australia	Homo sapiens
Acinetobacter_baumannii_L13	Acinetobacter_baumannii_ATCC_19606	97.5415	Acinetobacter baumannii	GCA_003721135.1	https://ftp.ncbi.nlm.nih.gov/genomes/all/GCA/003/721/135/GCA_003721135.1_ASM372113v1	blank	China: Xinjiang	Homo sapiens
Acinetobacter_baumannii_1293320	Acinetobacter_baumannii_DSM_30007	97.5427	Acinetobacter baumannii	GCA_000584455.1	https://ftp.ncbi.nlm.nih.gov/genomes/all/GCA/000/584/455/GCA_000584455.1_ASM58445v1	sputum	USA	Homo sapiens
Acinetobacter_baumannii_NIPH_615	Acinetobacter_baumannii_ATCC_19606	97.5437	Acinetobacter baumannii	GCA_000368205.1	https://ftp.ncbi.nlm.nih.gov/genomes/all/GCA/000/368/205/GCA_000368205.1_Acin_baum_NIPH_615_V1	blank	blank	blank
Acinetobacter_sp._YH12110	Acinetobacter_indicus_CIP_110367	97.5439	Acinetobacter indicus	GCA_013419035.1	https://ftp.ncbi.nlm.nih.gov/genomes/all/GCA/013/419/035/GCA_013419035.1_ASM1341903v1	feces	China: Jiangsu	pig
Acinetobacter_indicus_AI31	Acinetobacter_indicus_CIP_110367	97.5442	Acinetobacter indicus	GCA_012370955.1	https://ftp.ncbi.nlm.nih.gov/genomes/all/GCA/012/370/955/GCA_012370955.1_ASM1237095v1	cow	China	blank
Acinetobacter_sp._YH12223	Acinetobacter_indicus_CIP_110367	97.5448	Acinetobacter indicus	GCA_013417855.1	https://ftp.ncbi.nlm.nih.gov/genomes/all/GCA/013/417/855/GCA_013417855.1_ASM1341785v1	feces	China: Jiangsu	pig
Acinetobacter_nosocomialis_AC1819	Acinetobacter_nosocomialis_LMG_10619	97.545	Acinetobacter nosocomialis	GCA_018139165.1	https://ftp.ncbi.nlm.nih.gov/genomes/all/GCA/018/139/165/GCA_018139165.1_ASM1813916v1	blood	Malaysia	Homo sapiens
Acinetobacter_baumannii_AMA4	Acinetobacter_baumannii_DSM_30007	97.5453	Acinetobacter baumannii	GCA_009645525.1	https://ftp.ncbi.nlm.nih.gov/genomes/all/GCA/009/645/525/GCA_009645525.1_ASM964552v1	blank	blank	Homo sapiens
Acinetobacter_junii_SC57	Acinetobacter_junii_CIP_64.5	97.5454	Acinetobacter junii	GCA_003293735.1	https://ftp.ncbi.nlm.nih.gov/genomes/all/GCA/003/293/735/GCA_003293735.1_ASM329373v1	Gold and copper mine	China	blank
Acinetobacter_baumannii_NIPH_190	Acinetobacter_baumannii_ATCC_19606	97.5457	Acinetobacter baumannii	GCA_000368525.1	https://ftp.ncbi.nlm.nih.gov/genomes/all/GCA/000/368/525/GCA_000368525.1_Acin_baum_NIPH_190_V1	blank	blank	blank
Acinetobacter_baumannii_GTC_03328	Acinetobacter_baumannii_ATCC_19606	97.5462	Acinetobacter baumannii	GCA_000760455.1	https://ftp.ncbi.nlm.nih.gov/genomes/all/GCA/000/760/455/GCA_000760455.1_ASM76045v1	blank	blank	blank
Acinetobacter_baumannii_PR388	Acinetobacter_baumannii_DSM_30007	97.5475	Acinetobacter baumannii	GCA_002138105.1	https://ftp.ncbi.nlm.nih.gov/genomes/all/GCA/002/138/105/GCA_002138105.1_ASM213810v1	blank	blank	blank
Acinetobacter_baumannii_J15	Acinetobacter_baumannii_DSM_30007	97.5478	Acinetobacter baumannii	GCA_007197635.1	https://ftp.ncbi.nlm.nih.gov/genomes/all/GCA/007/197/635/GCA_007197635.1_ASM719763v1	blank	Australia: Westmead, Sydney	Homo sapiens
Acinetobacter_haemolyticus_AN54	Acinetobacter_haemolyticus_MTCC_9819	97.5487	Acinetobacter haemolyticus	GCA_003430865.2	https://ftp.ncbi.nlm.nih.gov/genomes/all/GCA/003/430/865/GCA_003430865.2_ASM343086v2	Peritoneal dialysis fluid	Mexico: Puebla	Homo sapiens
Acinetobacter_baumannii_CIAT758	Acinetobacter_baumannii_DSM_30007	97.5488	Acinetobacter baumannii	GCA_004758865.1	https://ftp.ncbi.nlm.nih.gov/genomes/all/GCA/004/758/865/GCA_004758865.1_ASM475886v1	blood	India	Homo sapiens
Acinetobacter_baumannii_ABBL071	Acinetobacter_baumannii_ATCC_19606	97.5488	Acinetobacter baumannii	GCA_001415085.1	https://ftp.ncbi.nlm.nih.gov/genomes/all/GCA/001/415/085/GCA_001415085.1_ASM141508v1	Blood	USA: Chicago	Homo sapiens
Acinetobacter_baumannii_Pesh-37	Acinetobacter_baumannii_DSM_30007	97.5489	Acinetobacter baumannii	GCA_003346005.1	https://ftp.ncbi.nlm.nih.gov/genomes/all/GCA/003/346/005/GCA_003346005.1_ASM334600v1	Nasobronchial lavage	Pakistan: Peshawar	Homo sapiens
Acinetobacter_baumannii_161600	Acinetobacter_baumannii_DSM_30007	97.5493	Acinetobacter baumannii	GCA_014560475.1	https://ftp.ncbi.nlm.nih.gov/genomes/all/GCA/014/560/475/GCA_014560475.1_ASM1456047v1	blood	China	Homo sapiens
Acinetobacter_baumannii_ABBL052	Acinetobacter_baumannii_DSM_30007	97.5494	Acinetobacter baumannii	GCA_001433335.1	https://ftp.ncbi.nlm.nih.gov/genomes/all/GCA/001/433/335/GCA_001433335.1_ASM143333v1	Blood	USA: Chicago	Homo sapiens
Acinetobacter_sp._YH12100	Acinetobacter_pseudolwoffii_ANC_5044	97.5496	Acinetobacter pseudolwoffii	GCA_013419135.1	https://ftp.ncbi.nlm.nih.gov/genomes/all/GCA/013/419/135/GCA_013419135.1_ASM1341913v1	feces	China: Shanghai	pig
Acinetobacter_baumannii_MC3	Acinetobacter_baumannii_DSM_30007	97.5501	Acinetobacter baumannii	GCA_003596075.1	https://ftp.ncbi.nlm.nih.gov/genomes/all/GCA/003/596/075/GCA_003596075.1_ASM359607v1	Tracheal Secretion	Bolivia: Cochabamba	Homo sapiens
Acinetobacter_baumannii_Ab-C102	Acinetobacter_baumannii_ATCC_19606	97.5502	Acinetobacter baumannii	GCA_012931605.1	https://ftp.ncbi.nlm.nih.gov/genomes/all/GCA/012/931/605/GCA_012931605.1_ASM1293160v1	blood	Ghana: Sekondi-Takoradi	Homo sapiens
Acinetobacter_baumannii_4300STDY7045845	Acinetobacter_baumannii_ATCC_19606	97.5503	Acinetobacter baumannii	GCA_900496295.1	https://ftp.ncbi.nlm.nih.gov/genomes/all/GCA/900/496/295/GCA_900496295.1_24276_3_4	blank	blank	blank
Acinetobacter_baumannii_LAC4	Acinetobacter_baumannii_DSM_30007	97.5503	Acinetobacter baumannii	GCA_001908295.1	https://ftp.ncbi.nlm.nih.gov/genomes/all/GCA/001/908/295/GCA_001908295.1_ASM190829v1	blank	USA	blank
Acinetobacter_baumannii_872_16	Acinetobacter_baumannii_DSM_30007	97.5504	Acinetobacter baumannii	GCA_015537145.1	https://ftp.ncbi.nlm.nih.gov/genomes/all/GCA/015/537/145/GCA_015537145.1_ASM1553714v1	urine	Brazil: Campinas	Homo sapiens
Acinetobacter_baumannii_4300STDY7045885	Acinetobacter_baumannii_JCM_6841	97.5513	Acinetobacter baumannii	GCA_900496555.1	https://ftp.ncbi.nlm.nih.gov/genomes/all/GCA/900/496/555/GCA_900496555.1_24276_3_42	blank	blank	blank
Acinetobacter_baumannii_AMA42	Acinetobacter_baumannii_DSM_30007	97.5515	Acinetobacter baumannii	GCA_009645465.1	https://ftp.ncbi.nlm.nih.gov/genomes/all/GCA/009/645/465/GCA_009645465.1_ASM964546v1	blank	blank	Homo sapiens
Acinetobacter_baumannii_1262761-105	Acinetobacter_baumannii_DSM_30007	97.5518	Acinetobacter baumannii	GCA_000682475.1	https://ftp.ncbi.nlm.nih.gov/genomes/all/GCA/000/682/475/GCA_000682475.1_ASM68247v1	blank	USA	Homo sapiens
Acinetobacter_baumannii_TG31299	Acinetobacter_baumannii_ATCC_19606	97.5524	Acinetobacter baumannii	GCA_003949235.1	https://ftp.ncbi.nlm.nih.gov/genomes/all/GCA/003/949/235/GCA_003949235.1_ASM394923v1	urine	USA: Arizona	Homo sapiens
Acinetobacter_nosocomialis_UBA6568	Acinetobacter_nosocomialis_LMG_10619	97.5529	Acinetobacter nosocomialis	GCA_002434135.1	https://ftp.ncbi.nlm.nih.gov/genomes/all/GCA/002/434/135/GCA_002434135.1_ASM243413v1	wood	USA:New York City	blank
Acinetobacter_baumannii_J9	Acinetobacter_baumannii_DSM_30007	97.5541	Acinetobacter baumannii	GCA_007107525.1	https://ftp.ncbi.nlm.nih.gov/genomes/all/GCA/007/107/525/GCA_007107525.1_ASM710752v1	blank	Australia: Westmead, Sydney	Homo sapiens
Acinetobacter_baumannii_AR_0088	Acinetobacter_baumannii_DSM_30007	97.5544	Acinetobacter baumannii	GCA_003006035.1	https://ftp.ncbi.nlm.nih.gov/genomes/all/GCA/003/006/035/GCA_003006035.1_ASM300603v1	blank	blank	blank
Acinetobacter_baumannii_547_16	Acinetobacter_baumannii_ATCC_19606	97.5546	Acinetobacter baumannii	GCA_015538205.1	https://ftp.ncbi.nlm.nih.gov/genomes/all/GCA/015/538/205/GCA_015538205.1_ASM1553820v1	urine	Brazil: Presidente Prudente	Homo sapiens
Acinetobacter_baumannii_IHIT38008	Acinetobacter_baumannii_DSM_30007	97.5548	Acinetobacter baumannii	GCA_004153595.1	https://ftp.ncbi.nlm.nih.gov/genomes/all/GCA/004/153/595/GCA_004153595.1_ASM415359v1	urine	Germany	dog
Acinetobacter_baumannii_A4	Acinetobacter_baumannii_DSM_30007	97.5553	Acinetobacter baumannii	GCA_015265785.1	https://ftp.ncbi.nlm.nih.gov/genomes/all/GCA/015/265/785/GCA_015265785.1_ASM1526578v1	blood	South Africa: KwaZulu-Natal	Homo sapiens
Acinetobacter_ursingii_FDAARGOS_1096	Acinetobacter_ursingii_DSM_16037	97.5563	Acinetobacter ursingii	GCA_016726345.1	https://ftp.ncbi.nlm.nih.gov/genomes/all/GCA/016/726/345/GCA_016726345.1_ASM1672634v1	blank	Germany: Braunschweig	blank
Acinetobacter_pittii_YMC2013_3_R2081	Acinetobacter_pittii_ATCC_19004	97.5563	Acinetobacter pittii	GCA_003843635.1	https://ftp.ncbi.nlm.nih.gov/genomes/all/GCA/003/843/635/GCA_003843635.1_ASM384363v1	sputum	South Korea: Seoul	Homo sapiens
Acinetobacter_baumannii_UH392_536	Acinetobacter_baumannii_DSM_30007	97.5565	Acinetobacter baumannii	GCA_000811805.3	https://ftp.ncbi.nlm.nih.gov/genomes/all/GCA/000/811/805/GCA_000811805.3_ASM81180v3	Bodily fluid	USA	Homo sapiens
Acinetobacter_indicus_AI16	Acinetobacter_indicus_CIP_110367	97.5567	Acinetobacter indicus	GCA_012366775.1	https://ftp.ncbi.nlm.nih.gov/genomes/all/GCA/012/366/775/GCA_012366775.1_ASM1236677v1	cow	China	blank
Acinetobacter_baumannii_15A835	Acinetobacter_baumannii_ATCC_19606	97.5568	Acinetobacter baumannii	GCA_020255525.1	https://ftp.ncbi.nlm.nih.gov/genomes/all/GCA/020/255/525/GCA_020255525.1_ASM2025552v1	blood	France: Besancon	Homo sapiens
Acinetobacter_baumannii_AMA8	Acinetobacter_baumannii_DSM_30007	97.557	Acinetobacter baumannii	GCA_009645235.1	https://ftp.ncbi.nlm.nih.gov/genomes/all/GCA/009/645/235/GCA_009645235.1_ASM964523v1	blank	blank	Homo sapiens
Acinetobacter_sp._ANC_5324	Acinetobacter_pseudolwoffii_ANC_5044	97.5575	Acinetobacter pseudolwoffii	GCA_002797255.1	https://ftp.ncbi.nlm.nih.gov/genomes/all/GCA/002/797/255/GCA_002797255.1_ASM279725v1	nose	Czech Republic: Koprivnice	goat
Acinetobacter_baumannii_212_16	Acinetobacter_baumannii_ATCC_19606	97.5579	Acinetobacter baumannii	GCA_015537245.1	https://ftp.ncbi.nlm.nih.gov/genomes/all/GCA/015/537/245/GCA_015537245.1_ASM1553724v1	tracheal secretion	Brazil: Presidente Prudente	Homo sapiens
Acinetobacter_baumannii_MRSN17593	Acinetobacter_baumannii_ATCC_19606	97.5583	Acinetobacter baumannii	GCA_001441405.1	https://ftp.ncbi.nlm.nih.gov/genomes/all/GCA/001/441/405/GCA_001441405.1_ASM144140v1	blood	USA: Alaska	Homo sapiens
Acinetobacter_baumannii_CCBH28244	Acinetobacter_baumannii_ATCC_19606	97.5592	Acinetobacter baumannii	GCA_015666535.1	https://ftp.ncbi.nlm.nih.gov/genomes/all/GCA/015/666/535/GCA_015666535.1_ASM1566653v1	Catheter Tip	Brazil	Homo sapiens
Acinetobacter_baumannii_MCR9238	Acinetobacter_baumannii_DSM_30007	97.5601	Acinetobacter baumannii	GCA_002927775.1	https://ftp.ncbi.nlm.nih.gov/genomes/all/GCA/002/927/775/GCA_002927775.1_ASM292777v1	wound	Honduras: Cortes, San Pedro Sula	Homo sapiens
Acinetobacter_baumannii_MRSN17592	Acinetobacter_baumannii_JCM_6841	97.5604	Acinetobacter baumannii	GCA_001441355.1	https://ftp.ncbi.nlm.nih.gov/genomes/all/GCA/001/441/355/GCA_001441355.1_ASM144135v1	blood	USA: Alaska	Homo sapiens
Acinetobacter_venetianus_JKSF02	Acinetobacter_venetianus_RAG-1	97.5605	Acinetobacter venetianus	GCA_001577485.1	https://ftp.ncbi.nlm.nih.gov/genomes/all/GCA/001/577/485/GCA_001577485.1_ASM157748v1	sediment	USA: San Jacinto River sediment in Houston, Texas	blank
Acinetobacter_baumannii_NIPH_410	Acinetobacter_baumannii_DSM_30007	97.561	Acinetobacter baumannii	GCA_000413915.1	https://ftp.ncbi.nlm.nih.gov/genomes/all/GCA/000/413/915/GCA_000413915.1_Acin_baum_NIPH_410_V1	blank	blank	blank
Acinetobacter_baumannii_219_ABAU	Acinetobacter_baumannii_DSM_30007	97.5611	Acinetobacter baumannii	GCA_001055965.1	https://ftp.ncbi.nlm.nih.gov/genomes/all/GCA/001/055/965/GCA_001055965.1_ASM105596v1	blank	USA: WA	Homo sapiens
Acinetobacter_baumannii_ZQ10	Acinetobacter_baumannii_DSM_30007	97.5612	Acinetobacter baumannii	GCA_002837905.2	https://ftp.ncbi.nlm.nih.gov/genomes/all/GCA/002/837/905/GCA_002837905.2_ASM283790v2	cerebrospinal fluid	Iraq: Baghdad	Homo sapiens
Acinetobacter_baumannii_ABBL044	Acinetobacter_baumannii_DSM_30007	97.5615	Acinetobacter baumannii	GCA_001433015.1	https://ftp.ncbi.nlm.nih.gov/genomes/all/GCA/001/433/015/GCA_001433015.1_ASM143301v1	Blood	USA: Chicago	Homo sapiens
Acinetobacter_baumannii_18A2070	Acinetobacter_baumannii_DSM_30007	97.562	Acinetobacter baumannii	GCA_020256005.1	https://ftp.ncbi.nlm.nih.gov/genomes/all/GCA/020/256/005/GCA_020256005.1_ASM2025600v1	rectal swab	France: Besancon	Homo sapiens
Acinetobacter_baumannii_MRSN14237	Acinetobacter_baumannii_DSM_30007	97.5626	Acinetobacter baumannii	GCA_006494225.1	https://ftp.ncbi.nlm.nih.gov/genomes/all/GCA/006/494/225/GCA_006494225.1_ASM649422v1	wound	Honduras	Homo sapiens
Acinetobacter_baumannii_H008	Acinetobacter_baumannii_DSM_30007	97.5626	Acinetobacter baumannii	GCA_004209195.1	https://ftp.ncbi.nlm.nih.gov/genomes/all/GCA/004/209/195/GCA_004209195.1_ASM420919v1	blank	Mexico	Homo sapiens
Acinetobacter_sp._YH12200	Acinetobacter_pseudolwoffii_ANC_5044	97.5629	Acinetobacter pseudolwoffii	GCA_013418175.1	https://ftp.ncbi.nlm.nih.gov/genomes/all/GCA/013/418/175/GCA_013418175.1_ASM1341817v1	soil	China: Zhejiang	blank
Acinetobacter_baumannii_C1T1-3	Acinetobacter_baumannii_DSM_30007	97.5631	Acinetobacter baumannii	GCA_004152785.1	https://ftp.ncbi.nlm.nih.gov/genomes/all/GCA/004/152/785/GCA_004152785.1_ASM415278v1	manure	Canada: London	Bos taurus
Acinetobacter_baumannii_ABUH537	Acinetobacter_baumannii_ATCC_19606	97.5636	Acinetobacter baumannii	GCA_002017485.1	https://ftp.ncbi.nlm.nih.gov/genomes/all/GCA/002/017/485/GCA_002017485.1_ASM201748v1	tracheal aspirate	USA: Ohio	Homo sapiens
Acinetobacter_baumannii_768_16	Acinetobacter_baumannii_ATCC_19606	97.5637	Acinetobacter baumannii	GCA_015538025.1	https://ftp.ncbi.nlm.nih.gov/genomes/all/GCA/015/538/025/GCA_015538025.1_ASM1553802v1	cerebrospinal fluid	Brazil: Aracaju	Homo sapiens
Acinetobacter_baumannii_MRSN31461	Acinetobacter_baumannii_ATCC_19606	97.5647	Acinetobacter baumannii	GCA_006491865.1	https://ftp.ncbi.nlm.nih.gov/genomes/all/GCA/006/491/865/GCA_006491865.1_ASM649186v1	groin	Germany	Homo sapiens
Acinetobacter_baumannii_Aci00866	Acinetobacter_baumannii_DSM_30007	97.565	Acinetobacter baumannii	GCA_005819315.1	https://ftp.ncbi.nlm.nih.gov/genomes/all/GCA/005/819/315/GCA_005819315.1_ASM581931v1	perianal swab	Germany: Heidelberg	Homo sapiens
Acinetobacter_nosocomialis_AC1631	Acinetobacter_nosocomialis_NIPH_2119	97.5654	Acinetobacter nosocomialis	GCA_018139385.1	https://ftp.ncbi.nlm.nih.gov/genomes/all/GCA/018/139/385/GCA_018139385.1_ASM1813938v1	blood	Malaysia	Homo sapiens
Acinetobacter_baumannii_34301	Acinetobacter_baumannii_ATCC_19606	97.5658	Acinetobacter baumannii	GCA_008709585.1	https://ftp.ncbi.nlm.nih.gov/genomes/all/GCA/008/709/585/GCA_008709585.1_AB_34301	blank	India	Homo sapiens
Acinetobacter_baumannii_4300STDY7045852	Acinetobacter_baumannii_ATCC_19606	97.5662	Acinetobacter baumannii	GCA_900496245.1	https://ftp.ncbi.nlm.nih.gov/genomes/all/GCA/900/496/245/GCA_900496245.1_24276_3_11	blank	blank	blank
Acinetobacter_baumannii_Ab106	Acinetobacter_baumannii_DSM_30007	97.5664	Acinetobacter baumannii	GCA_005786105.1	https://ftp.ncbi.nlm.nih.gov/genomes/all/GCA/005/786/105/GCA_005786105.1_ASM578610v1	Sputamentum	China: Gungdong	Homo sapiens
Acinetobacter_baumannii_BA996	Acinetobacter_baumannii_ATCC_19606	97.5674	Acinetobacter baumannii	GCA_010179495.1	https://ftp.ncbi.nlm.nih.gov/genomes/all/GCA/010/179/495/GCA_010179495.1_ASM1017949v1	blood	India: Vellore	Homo sapiens
Acinetobacter_baumannii_PM193665	Acinetobacter_baumannii_ATCC_19606	97.5674	Acinetobacter baumannii	GCA_012935085.1	https://ftp.ncbi.nlm.nih.gov/genomes/all/GCA/012/935/085/GCA_012935085.1_ASM1293508v1	Pus	India	Homo sapiens
Acinetobacter_baumannii_MC18	Acinetobacter_baumannii_DSM_30007	97.5679	Acinetobacter baumannii	GCA_003596205.1	https://ftp.ncbi.nlm.nih.gov/genomes/all/GCA/003/596/205/GCA_003596205.1_ASM359620v1	Foley Catheter	Bolivia: Cochabamba	Homo sapiens
Acinetobacter_sp._478810	Acinetobacter_pittii_ATCC_19004	97.5682	Acinetobacter pittii	GCA_000584015.2	https://ftp.ncbi.nlm.nih.gov/genomes/all/GCA/000/584/015/GCA_000584015.2_ASM58401v2	perirectal	USA	Homo sapiens
Acinetobacter_baumannii_ABAY14008	Acinetobacter_baumannii_DSM_30007	97.5684	Acinetobacter baumannii	GCA_009736145.1	https://ftp.ncbi.nlm.nih.gov/genomes/all/GCA/009/736/145/GCA_009736145.1_ASM973614v1	blood sample from a 75 year old man who was hospitalized in ICU	South Korea: Seoul	Homo sapiens
Acinetobacter_baumannii_AMA46	Acinetobacter_baumannii_ATCC_19606	97.5686	Acinetobacter baumannii	GCA_009645365.1	https://ftp.ncbi.nlm.nih.gov/genomes/all/GCA/009/645/365/GCA_009645365.1_ASM964536v1	blank	blank	Homo sapiens
Acinetobacter_baumannii_Naval-82	Acinetobacter_baumannii_DSM_30007	97.5696	Acinetobacter baumannii	GCA_000309255.1	https://ftp.ncbi.nlm.nih.gov/genomes/all/GCA/000/309/255/GCA_000309255.1_gacin33v1.0	blood	USA: National Naval Medical Center, Bethesda, MD	Homo sapiens
Acinetobacter_pittii_AB33	Acinetobacter_pittii_ATCC_19004	97.572	Acinetobacter pittii	GCA_003006915.1	https://ftp.ncbi.nlm.nih.gov/genomes/all/GCA/003/006/915/GCA_003006915.1_ASM300691v1	blood	China: Guangzhou	Homo sapiens
Acinetobacter_baumannii_1007214	Acinetobacter_baumannii_CIP_70.34	97.5722	Acinetobacter baumannii	GCA_000588675.1	https://ftp.ncbi.nlm.nih.gov/genomes/all/GCA/000/588/675/GCA_000588675.1_ASM58867v1	sputum	USA	Homo sapiens
Acinetobacter_baumannii_ARLG1872	Acinetobacter_baumannii_ATCC_19606	97.5727	Acinetobacter baumannii	GCA_002145375.1	https://ftp.ncbi.nlm.nih.gov/genomes/all/GCA/002/145/375/GCA_002145375.1_ASM214537v1	blank	blank	blank
Acinetobacter_baumannii_T12	Acinetobacter_baumannii_CIP_70.34	97.573	Acinetobacter baumannii	GCA_003130945.1	https://ftp.ncbi.nlm.nih.gov/genomes/all/GCA/003/130/945/GCA_003130945.1_ASM313094v1	blank	China	blank
Acinetobacter_baumannii_MRSN16898	Acinetobacter_baumannii_ATCC_19606	97.5737	Acinetobacter baumannii	GCA_001441465.1	https://ftp.ncbi.nlm.nih.gov/genomes/all/GCA/001/441/465/GCA_001441465.1_ASM144146v1	sputum	USA: Alaska	Homo sapiens
Acinetobacter_baumannii_211_16	Acinetobacter_baumannii_ATCC_19606	97.5748	Acinetobacter baumannii	GCA_015537405.1	https://ftp.ncbi.nlm.nih.gov/genomes/all/GCA/015/537/405/GCA_015537405.1_ASM1553740v1	tracheal secretion	Brazil: Presidente Prudente	Homo sapiens
Acinetobacter_sp._18QD2AZ41W	Acinetobacter_pseudolwoffii_ANC_5044	97.5752	Acinetobacter pseudolwoffii	GCA_009829025.1	https://ftp.ncbi.nlm.nih.gov/genomes/all/GCA/009/829/025/GCA_009829025.1_ASM982902v1	feces	China: Shandong	pig
Acinetobacter_baumannii_SP4955	Acinetobacter_baumannii_DSM_30007	97.5753	Acinetobacter baumannii	GCA_011602535.1	https://ftp.ncbi.nlm.nih.gov/genomes/all/GCA/011/602/535/GCA_011602535.1_ASM1160253v1	Endotracheal Aspirate	India: Vellore	Homo sapiens
Acinetobacter_baumannii_TUM16643	Acinetobacter_baumannii_DSM_30007	97.5763	Acinetobacter baumannii	GCA_008581605.1	https://ftp.ncbi.nlm.nih.gov/genomes/all/GCA/008/581/605/GCA_008581605.1_ASM858160v1	human blood	Japan	Homo sapiens
Acinetobacter_baumannii_Ab376	Acinetobacter_baumannii_JCM_6841	97.5763	Acinetobacter baumannii	GCA_012524275.1	https://ftp.ncbi.nlm.nih.gov/genomes/all/GCA/012/524/275/GCA_012524275.1_ASM1252427v1	catheter	Argentina: Buenos Aires	Homo sapiens
Acinetobacter_baumannii_P630	Acinetobacter_baumannii_DSM_30007	97.5765	Acinetobacter baumannii	GCA_001544395.1	https://ftp.ncbi.nlm.nih.gov/genomes/all/GCA/001/544/395/GCA_001544395.1_P630	blank	blank	blank
Acinetobacter_baumannii_Aci00848	Acinetobacter_baumannii_DSM_30007	97.5766	Acinetobacter baumannii	GCA_005819475.1	https://ftp.ncbi.nlm.nih.gov/genomes/all/GCA/005/819/475/GCA_005819475.1_ASM581947v1	rectal swab	Germany: Heidelberg	Homo sapiens
Acinetobacter_baumannii_3390	Acinetobacter_baumannii_ATCC_19606	97.5777	Acinetobacter baumannii	GCA_000584335.1	https://ftp.ncbi.nlm.nih.gov/genomes/all/GCA/000/584/335/GCA_000584335.1_ASM58433v1	perirectal	USA	Homo sapiens
Acinetobacter_baumannii_107m	Acinetobacter_baumannii_DSM_30007	97.5778	Acinetobacter baumannii	GCA_000493615.1	https://ftp.ncbi.nlm.nih.gov/genomes/all/GCA/000/493/615/GCA_000493615.1_ABIBUN_1	blank	blank	blank
Acinetobacter_baumannii_A-71.192	Acinetobacter_baumannii_DSM_30007	97.5794	Acinetobacter baumannii	GCA_009829595.1	https://ftp.ncbi.nlm.nih.gov/genomes/all/GCA/009/829/595/GCA_009829595.1_ASM982959v1	tracheal secretion	Brazil	Homo sapiens
Acinetobacter_baumannii_170876	Acinetobacter_baumannii_DSM_30007	97.5799	Acinetobacter baumannii	GCA_014560135.1	https://ftp.ncbi.nlm.nih.gov/genomes/all/GCA/014/560/135/GCA_014560135.1_ASM1456013v1	urine	China	Homo sapiens
Acinetobacter_baumannii_PM4229	Acinetobacter_baumannii_DSM_30007	97.5801	Acinetobacter baumannii	GCA_010499775.1	https://ftp.ncbi.nlm.nih.gov/genomes/all/GCA/010/499/775/GCA_010499775.1_ASM1049977v1	blood	India: NewDelhi	Homo sapiens
Acinetobacter_baumannii_ABAY14004	Acinetobacter_baumannii_DSM_30007	97.5821	Acinetobacter baumannii	GCA_009736195.1	https://ftp.ncbi.nlm.nih.gov/genomes/all/GCA/009/736/195/GCA_009736195.1_ASM973619v1	blood sample from a 82 year old woman who was hospitalized in ICU	South Korea: Seoul	Homo sapiens
Acinetobacter_sp._C15	Acinetobacter_indicus_CIP_110367	97.5821	Acinetobacter indicus	GCA_013420645.1	https://ftp.ncbi.nlm.nih.gov/genomes/all/GCA/013/420/645/GCA_013420645.1_ASM1342064v1	feces	China: Guangdong	pig
Acinetobacter_baumannii_MRSN30885	Acinetobacter_baumannii_CIP_70.34	97.5822	Acinetobacter baumannii	GCA_006493945.1	https://ftp.ncbi.nlm.nih.gov/genomes/all/GCA/006/493/945/GCA_006493945.1_ASM649394v1	respiratory	Germany	Homo sapiens
Acinetobacter_baumannii_4300STDY7045886	Acinetobacter_baumannii_DSM_30007	97.5822	Acinetobacter baumannii	GCA_900496485.1	https://ftp.ncbi.nlm.nih.gov/genomes/all/GCA/900/496/485/GCA_900496485.1_24276_3_43	blank	blank	blank
Acinetobacter_baumannii_RB-1399	Acinetobacter_baumannii_DSM_30007	97.5822	Acinetobacter baumannii	GCA_001891205.1	https://ftp.ncbi.nlm.nih.gov/genomes/all/GCA/001/891/205/GCA_001891205.1_ASM189120v1	patient sputum	Colombia: Norte de Santander	Homo sapiens
Acinetobacter_baumannii_OIFC111	Acinetobacter_baumannii_DSM_30007	97.5825	Acinetobacter baumannii	GCA_000309155.1	https://ftp.ncbi.nlm.nih.gov/genomes/all/GCA/000/309/155/GCA_000309155.1_gacin48v1.0	perineum	USA: Walter Reed Army Medical Center, Washington, DC	Homo sapiens
Acinetobacter_baumannii_ABNIH28	Acinetobacter_baumannii_DSM_30007	97.5825	Acinetobacter baumannii	GCA_002902885.1	https://ftp.ncbi.nlm.nih.gov/genomes/all/GCA/002/902/885/GCA_002902885.1_ASM290288v1	blank	USA	blank
Acinetobacter_baumannii_MRSN31159	Acinetobacter_baumannii_ATCC_19606	97.5825	Acinetobacter baumannii	GCA_006494615.1	https://ftp.ncbi.nlm.nih.gov/genomes/all/GCA/006/494/615/GCA_006494615.1_ASM649461v1	sterile tissue	Germany	Homo sapiens
Acinetobacter_baumannii_MC102	Acinetobacter_baumannii_DSM_30007	97.5825	Acinetobacter baumannii	GCA_003584275.1	https://ftp.ncbi.nlm.nih.gov/genomes/all/GCA/003/584/275/GCA_003584275.1_ASM358427v1	Ulcer	Bolivia: Cochabamba	Homo sapiens
Acinetobacter_baumannii_MC104	Acinetobacter_baumannii_DSM_30007	97.5833	Acinetobacter baumannii	GCA_003584255.1	https://ftp.ncbi.nlm.nih.gov/genomes/all/GCA/003/584/255/GCA_003584255.1_ASM358425v1	Wound secretion	Bolivia: Cochabamba	Homo sapiens
Acinetobacter_nosocomialis_6411	Acinetobacter_nosocomialis_LMG_10619	97.5837	Acinetobacter nosocomialis	GCA_000814165.3	https://ftp.ncbi.nlm.nih.gov/genomes/all/GCA/000/814/165/GCA_000814165.3_ASM81416v3	blank	blank	blank
Acinetobacter_pittii_ACIN00247	Acinetobacter_pittii_DSM_25618	97.5837	Acinetobacter pittii	GCA_016506275.1	https://ftp.ncbi.nlm.nih.gov/genomes/all/GCA/016/506/275/GCA_016506275.1_ASM1650627v1	urine	USA: Pittsburgh, Pennsylvania	Homo sapiens
Acinetobacter_baumannii_ABF9692	Acinetobacter_baumannii_DSM_30007	97.5845	Acinetobacter baumannii	GCA_012974585.1	https://ftp.ncbi.nlm.nih.gov/genomes/all/GCA/012/974/585/GCA_012974585.1_ASM1297458v1	trachea	China:Guangdong province	Duck
Acinetobacter_sp._YH12208	Acinetobacter_pseudolwoffii_ANC_5044	97.5847	Acinetobacter pseudolwoffii	GCA_013418055.1	https://ftp.ncbi.nlm.nih.gov/genomes/all/GCA/013/418/055/GCA_013418055.1_ASM1341805v1	soil	China: Zhejiang	blank
Acinetobacter_sp._YH12113	Acinetobacter_indicus_CIP_110367	97.5857	Acinetobacter indicus	GCA_013418915.1	https://ftp.ncbi.nlm.nih.gov/genomes/all/GCA/013/418/915/GCA_013418915.1_ASM1341891v1	feces	China: Jiangsu	pig
Acinetobacter_baumannii_AB18PR065	Acinetobacter_baumannii_ATCC_19606	97.5858	Acinetobacter baumannii	GCA_003994455.1	https://ftp.ncbi.nlm.nih.gov/genomes/all/GCA/003/994/455/GCA_003994455.1_ASM399445v1	feces	China	pig
Acinetobacter_baumannii_MRSN15088	Acinetobacter_baumannii_DSM_30007	97.5863	Acinetobacter baumannii	GCA_006493915.1	https://ftp.ncbi.nlm.nih.gov/genomes/all/GCA/006/493/915/GCA_006493915.1_ASM649391v1	wound	USA	Homo sapiens
Acinetobacter_baumannii_CriePir307	Acinetobacter_baumannii_ATCC_19606	97.5871	Acinetobacter baumannii	GCA_016654265.1	https://ftp.ncbi.nlm.nih.gov/genomes/all/GCA/016/654/265/GCA_016654265.1_ASM1665426v1	BAL (bronchoalveolar lavage)	Russia: Moscow	Homo sapiens
Acinetobacter_baumannii_AB5256	Acinetobacter_baumannii_DSM_30007	97.5871	Acinetobacter baumannii	GCA_000241705.2	https://ftp.ncbi.nlm.nih.gov/genomes/all/GCA/000/241/705/GCA_000241705.2_ASM24170v2	blood	USA	Homo sapiens
Acinetobacter_pittii_FDAARGOS_1398	Acinetobacter_lactucae_NRRL_B-41902	97.5872	Acinetobacter lactucae	GCA_019046965.1	https://ftp.ncbi.nlm.nih.gov/genomes/all/GCA/019/046/965/GCA_019046965.1_ASM1904696v1	blank	Germany: Braunschweig	blank
Acinetobacter_baumannii_SH40	Acinetobacter_baumannii_DSM_30007	97.5876	Acinetobacter baumannii	GCA_003131025.1	https://ftp.ncbi.nlm.nih.gov/genomes/all/GCA/003/131/025/GCA_003131025.1_ASM313102v1	blank	China	blank
Acinetobacter_nosocomialis_AC1564	Acinetobacter_nosocomialis_NIPH_2119	97.5877	Acinetobacter nosocomialis	GCA_017837655.1	https://ftp.ncbi.nlm.nih.gov/genomes/all/GCA/017/837/655/GCA_017837655.1_ASM1783765v1	endotracheal tube swab	Malaysia	Homo sapiens
Acinetobacter_baumannii_Ab-C63	Acinetobacter_baumannii_ATCC_19606	97.5879	Acinetobacter baumannii	GCA_012931665.1	https://ftp.ncbi.nlm.nih.gov/genomes/all/GCA/012/931/665/GCA_012931665.1_ASM1293166v1	sputum	Ghana: Sekondi-Takoradi	Homo sapiens
Acinetobacter_baumannii_PM194188	Acinetobacter_baumannii_ATCC_19606	97.588	Acinetobacter baumannii	GCA_012935105.1	https://ftp.ncbi.nlm.nih.gov/genomes/all/GCA/012/935/105/GCA_012935105.1_ASM1293510v1	BAL	India	Homo sapiens
Acinetobacter_baumannii_ABUH428	Acinetobacter_baumannii_DSM_30007	97.5883	Acinetobacter baumannii	GCA_002182685.1	https://ftp.ncbi.nlm.nih.gov/genomes/all/GCA/002/182/685/GCA_002182685.1_ASM218268v1	WOUND/ABSCESS	USA	Homo sapiens
Acinetobacter_baumannii_MRSN7113	Acinetobacter_baumannii_JCM_6841	97.5883	Acinetobacter baumannii	GCA_006492505.1	https://ftp.ncbi.nlm.nih.gov/genomes/all/GCA/006/492/505/GCA_006492505.1_ASM649250v1	wound	USA	Homo sapiens
Acinetobacter_baumannii_ABOB15	Acinetobacter_baumannii_DSM_30007	97.5887	Acinetobacter baumannii	GCA_001416475.1	https://ftp.ncbi.nlm.nih.gov/genomes/all/GCA/001/416/475/GCA_001416475.1_ASM141647v1	blank	USA: Chicago	Homo sapiens
Acinetobacter_baumannii_AR_0033	Acinetobacter_baumannii_ATCC_19606	97.5892	Acinetobacter baumannii	GCA_001874885.1	https://ftp.ncbi.nlm.nih.gov/genomes/all/GCA/001/874/885/GCA_001874885.1_ASM187488v1	blank	blank	blank
Acinetobacter_baumannii_TG22158	Acinetobacter_baumannii_ATCC_19606	97.5898	Acinetobacter baumannii	GCA_003948495.1	https://ftp.ncbi.nlm.nih.gov/genomes/all/GCA/003/948/495/GCA_003948495.1_ASM394849v1	trach asp	USA: Arizona	Homo sapiens
Acinetobacter_nosocomialis_2010S01-197	Acinetobacter_nosocomialis_NIPH_2119	97.5899	Acinetobacter nosocomialis	GCA_003359505.2	https://ftp.ncbi.nlm.nih.gov/genomes/all/GCA/003/359/505/GCA_003359505.2_ASM335950v2	blank	Taiwan	Homo sapiens
Acinetobacter_baumannii_MC78	Acinetobacter_baumannii_DSM_30007	97.5901	Acinetobacter baumannii	GCA_003584385.1	https://ftp.ncbi.nlm.nih.gov/genomes/all/GCA/003/584/385/GCA_003584385.1_ASM358438v1	blank	Bolivia: Cochabamba	Homo sapiens
Acinetobacter_baumannii_MCR10172	Acinetobacter_baumannii_ATCC_19606	97.5912	Acinetobacter baumannii	GCA_002927805.1	https://ftp.ncbi.nlm.nih.gov/genomes/all/GCA/002/927/805/GCA_002927805.1_ASM292780v1	wound	Honduras: Cortes, San Pedro Sula	Homo sapiens
Acinetobacter_baumannii_LUH_6220	Acinetobacter_baumannii_DSM_30007	97.5913	Acinetobacter baumannii	GCA_001007745.1	https://ftp.ncbi.nlm.nih.gov/genomes/all/GCA/001/007/745/GCA_001007745.1_ASM100774v1	respiratory tract	Netherlands	Homo sapiens
Acinetobacter_baumannii_PR389	Acinetobacter_baumannii_DSM_30007	97.5916	Acinetobacter baumannii	GCA_002138155.1	https://ftp.ncbi.nlm.nih.gov/genomes/all/GCA/002/138/155/GCA_002138155.1_ASM213815v1	blank	blank	blank
Acinetobacter_baumannii_ABAY14002	Acinetobacter_baumannii_DSM_30007	97.5921	Acinetobacter baumannii	GCA_009736255.1	https://ftp.ncbi.nlm.nih.gov/genomes/all/GCA/009/736/255/GCA_009736255.1_ASM973625v1	blood sample from a 88 year old man who was hospitalized in ICU	South Korea: Seoul	Homo sapiens
Acinetobacter_baumannii_LHC22-2	Acinetobacter_baumannii_CIP_70.34	97.5927	Acinetobacter baumannii	GCA_020271605.1	https://ftp.ncbi.nlm.nih.gov/genomes/all/GCA/020/271/605/GCA_020271605.1_ASM2027160v1	a feces sample of chicken origin	China: Nantong, jiangsu province	blank
Acinetobacter_baumannii_50595	Acinetobacter_baumannii_ATCC_19606	97.5927	Acinetobacter baumannii	GCA_000582155.1	https://ftp.ncbi.nlm.nih.gov/genomes/all/GCA/000/582/155/GCA_000582155.1_ASM58215v1	perirectal	USA	Homo sapiens
Acinetobacter_baumannii_NIPH_601	Acinetobacter_baumannii_DSM_30007	97.5937	Acinetobacter baumannii	GCA_000369245.1	https://ftp.ncbi.nlm.nih.gov/genomes/all/GCA/000/369/245/GCA_000369245.1_Acin_baum_NIPH_601_V1	blank	blank	blank
Acinetobacter_baumannii_398_16	Acinetobacter_baumannii_JCM_6841	97.5937	Acinetobacter baumannii	GCA_015537275.1	https://ftp.ncbi.nlm.nih.gov/genomes/all/GCA/015/537/275/GCA_015537275.1_ASM1553727v1	blood	Brazil: Sao Paulo	Homo sapiens
Acinetobacter_baumannii_ABAY10003	Acinetobacter_baumannii_DSM_30007	97.5938	Acinetobacter baumannii	GCA_009737735.1	https://ftp.ncbi.nlm.nih.gov/genomes/all/GCA/009/737/735/GCA_009737735.1_ASM973773v1	blood sample from a 66 year old woman who was hospitalized in ICU	South Korea: Seoul	Homo sapiens
Acinetobacter_pittii_UKK-0544	Acinetobacter_pittii_DSM_25618	97.5941	Acinetobacter pittii	GCA_001706215.1	https://ftp.ncbi.nlm.nih.gov/genomes/all/GCA/001/706/215/GCA_001706215.1_ASM170621v1	blank	Germany: Braunschweig	Homo sapiens
Acinetobacter_baumannii_172315	Acinetobacter_baumannii_DSM_30007	97.5942	Acinetobacter baumannii	GCA_014560035.1	https://ftp.ncbi.nlm.nih.gov/genomes/all/GCA/014/560/035/GCA_014560035.1_ASM1456003v1	urine	China	Homo sapiens
Acinetobacter_baumannii_ACIN00211	Acinetobacter_baumannii_CIP_70.34	97.5948	Acinetobacter baumannii	GCA_016506505.1	https://ftp.ncbi.nlm.nih.gov/genomes/all/GCA/016/506/505/GCA_016506505.1_ASM1650650v1	blood	USA: Pittsburgh, Pennsylvania	Homo sapiens
Acinetobacter_baumannii_17A1882	Acinetobacter_baumannii_DSM_30007	97.5951	Acinetobacter baumannii	GCA_020254625.1	https://ftp.ncbi.nlm.nih.gov/genomes/all/GCA/020/254/625/GCA_020254625.1_ASM2025462v1	Rectal swab	France: Besancon	Homo sapiens
Acinetobacter_baumannii_SH37	Acinetobacter_baumannii_ATCC_19606	97.5954	Acinetobacter baumannii	GCA_003070935.1	https://ftp.ncbi.nlm.nih.gov/genomes/all/GCA/003/070/935/GCA_003070935.1_ASM307093v1	blank	China	blank
Acinetobacter_baumannii_45075_4	Acinetobacter_baumannii_ATCC_19606	97.5956	Acinetobacter baumannii	GCA_000681755.1	https://ftp.ncbi.nlm.nih.gov/genomes/all/GCA/000/681/755/GCA_000681755.1_ASM68175v1	blank	USA	Homo sapiens
Acinetobacter_sp._YH12114	Acinetobacter_indicus_CIP_110367	97.5956	Acinetobacter indicus	GCA_013418935.1	https://ftp.ncbi.nlm.nih.gov/genomes/all/GCA/013/418/935/GCA_013418935.1_ASM1341893v1	feces	China: Jiangsu	pig
Acinetobacter_baumannii_MC44	Acinetobacter_baumannii_DSM_30007	97.5959	Acinetobacter baumannii	GCA_003595835.1	https://ftp.ncbi.nlm.nih.gov/genomes/all/GCA/003/595/835/GCA_003595835.1_ASM359583v1	Wound secretion	Bolivia: Cochabamba	Homo sapiens
Acinetobacter_baumannii_MRSN7137	Acinetobacter_baumannii_JCM_6841	97.5962	Acinetobacter baumannii	GCA_006492635.1	https://ftp.ncbi.nlm.nih.gov/genomes/all/GCA/006/492/635/GCA_006492635.1_ASM649263v1	wound	USA	Homo sapiens
Acinetobacter_baumannii_PM2098	Acinetobacter_baumannii_ATCC_19606	97.5963	Acinetobacter baumannii	GCA_010500455.1	https://ftp.ncbi.nlm.nih.gov/genomes/all/GCA/010/500/455/GCA_010500455.1_ASM1050045v1	blood	India: NewDelhi	Homo sapiens
Acinetobacter_baumannii_MRSN16882	Acinetobacter_baumannii_ATCC_19606	97.5965	Acinetobacter baumannii	GCA_001441485.1	https://ftp.ncbi.nlm.nih.gov/genomes/all/GCA/001/441/485/GCA_001441485.1_ASM144148v1	tissue	USA: Alaska	Homo sapiens
Acinetobacter_baumannii_4300STDY7045851	Acinetobacter_baumannii_ATCC_19606	97.5969	Acinetobacter baumannii	GCA_900496175.1	https://ftp.ncbi.nlm.nih.gov/genomes/all/GCA/900/496/175/GCA_900496175.1_24276_3_10	blank	blank	blank
Acinetobacter_baumannii_ABUH518	Acinetobacter_baumannii_ATCC_19606	97.5969	Acinetobacter baumannii	GCA_002182405.1	https://ftp.ncbi.nlm.nih.gov/genomes/all/GCA/002/182/405/GCA_002182405.1_ASM218240v1	tracheal aspirate	USA	Homo sapiens
Acinetobacter_baumannii_ABBL038	Acinetobacter_baumannii_DSM_30007	97.597	Acinetobacter baumannii	GCA_001433005.1	https://ftp.ncbi.nlm.nih.gov/genomes/all/GCA/001/433/005/GCA_001433005.1_ASM143300v1	Blood	USA: Chicago	Homo sapiens
Acinetobacter_baumannii_NIPH_335	Acinetobacter_baumannii_DSM_30007	97.5973	Acinetobacter baumannii	GCA_000369205.1	https://ftp.ncbi.nlm.nih.gov/genomes/all/GCA/000/369/205/GCA_000369205.1_Acin_baum_NIPH_335_V1	blank	blank	blank
Acinetobacter_pittii_PR318	Acinetobacter_pittii_DSM_25618	97.5973	Acinetobacter pittii	GCA_002137365.1	https://ftp.ncbi.nlm.nih.gov/genomes/all/GCA/002/137/365/GCA_002137365.1_ASM213736v1	blank	blank	blank
Acinetobacter_baumannii_MC50	Acinetobacter_baumannii_DSM_30007	97.5985	Acinetobacter baumannii	GCA_003584535.1	https://ftp.ncbi.nlm.nih.gov/genomes/all/GCA/003/584/535/GCA_003584535.1_ASM358453v1	Tracheal secret.	Bolivia: Cochabamba	Homo sapiens
Acinetobacter_baumannii_Ab-B004d-c	Acinetobacter_baumannii_DSM_30007	97.5985	Acinetobacter baumannii	GCA_012931645.1	https://ftp.ncbi.nlm.nih.gov/genomes/all/GCA/012/931/645/GCA_012931645.1_ASM1293164v1	sputum	Ghana: Sekondi-Takoradi	Homo sapiens
Acinetobacter_baumannii_VB35435	Acinetobacter_baumannii_ATCC_19606	97.5986	Acinetobacter baumannii	GCA_005280415.1	https://ftp.ncbi.nlm.nih.gov/genomes/all/GCA/005/280/415/GCA_005280415.1_ASM528041v1	blood	India	Homo sapiens
Acinetobacter_baumannii_UBA3169	Acinetobacter_baumannii_ATCC_19606	97.5987	Acinetobacter baumannii	GCA_002364895.1	https://ftp.ncbi.nlm.nih.gov/genomes/all/GCA/002/364/895/GCA_002364895.1_ASM236489v1	wood	USA:New York City	blank
Acinetobacter_baumannii_D4	Acinetobacter_baumannii_DSM_30007	97.5988	Acinetobacter baumannii	GCA_018808925.1	https://ftp.ncbi.nlm.nih.gov/genomes/all/GCA/018/808/925/GCA_018808925.1_ASM1880892v1	wound	Australia: Sydney	Homo sapiens
Acinetobacter_indicus_HY20	Acinetobacter_indicus_CIP_110367	97.6002	Acinetobacter indicus	GCA_009296145.1	https://ftp.ncbi.nlm.nih.gov/genomes/all/GCA/009/296/145/GCA_009296145.1_ASM929614v1	feces	China:Zhejiang	blank
Acinetobacter_baumannii_MRSN16901	Acinetobacter_baumannii_ATCC_19606	97.6005	Acinetobacter baumannii	GCA_001441415.1	https://ftp.ncbi.nlm.nih.gov/genomes/all/GCA/001/441/415/GCA_001441415.1_ASM144141v1	blood	USA: Alaska	Homo sapiens
Acinetobacter_baumannii_OCU_Ac11	Acinetobacter_baumannii_DSM_30007	97.6006	Acinetobacter baumannii	GCA_003569645.1	https://ftp.ncbi.nlm.nih.gov/genomes/all/GCA/003/569/645/GCA_003569645.1_ASM356964v1	blood culture of a hospitalized patient	Japan:Osaka	Homo sapiens
Acinetobacter_baumannii_Naval-72	Acinetobacter_baumannii_DSM_30007	97.6012	Acinetobacter baumannii	GCA_000304675.1	https://ftp.ncbi.nlm.nih.gov/genomes/all/GCA/000/304/675/GCA_000304675.1_GACIN20v1.0	wound	USA: National Naval Medical Center, Bethesda, MD	Homo sapiens
Acinetobacter_baumannii_L070	Acinetobacter_baumannii_DSM_30007	97.6025	Acinetobacter baumannii	GCA_015537565.1	https://ftp.ncbi.nlm.nih.gov/genomes/all/GCA/015/537/565/GCA_015537565.1_ASM1553756v1	blood	Brazil: Botucatu	Homo sapiens
Acinetobacter_baumannii_MRSN16881	Acinetobacter_baumannii_JCM_6841	97.6027	Acinetobacter baumannii	GCA_001441475.1	https://ftp.ncbi.nlm.nih.gov/genomes/all/GCA/001/441/475/GCA_001441475.1_ASM144147v1	tissue	USA: Alaska	Homo sapiens
Acinetobacter_sp._YH1901141	Acinetobacter_towneri_DSM_14962	97.6035	Acinetobacter towneri	GCA_013416935.1	https://ftp.ncbi.nlm.nih.gov/genomes/all/GCA/013/416/935/GCA_013416935.1_ASM1341693v1	feces	China: Jiangxi	pig
Acinetobacter_baumannii_SQ017	Acinetobacter_baumannii_DSM_30007	97.6037	Acinetobacter baumannii	GCA_015694605.1	https://ftp.ncbi.nlm.nih.gov/genomes/all/GCA/015/694/605/GCA_015694605.1_ASM1569460v1	sputum	China: Guangzhou	Homo sapiens
Acinetobacter_towneri_GX7	Acinetobacter_towneri_DSM_14962	97.6037	Acinetobacter towneri	GCA_017498625.1	https://ftp.ncbi.nlm.nih.gov/genomes/all/GCA/017/498/625/GCA_017498625.1_ASM1749862v1	feces	China:Guangxi	porcine
Acinetobacter_nosocomialis_162085	Acinetobacter_nosocomialis_NIPH_2119	97.6038	Acinetobacter nosocomialis	GCA_014560415.1	https://ftp.ncbi.nlm.nih.gov/genomes/all/GCA/014/560/415/GCA_014560415.1_ASM1456041v1	blood	China	Homo sapiens
Acinetobacter_sp._YH12117	Acinetobacter_indicus_CIP_110367	97.6045	Acinetobacter indicus	GCA_013418865.1	https://ftp.ncbi.nlm.nih.gov/genomes/all/GCA/013/418/865/GCA_013418865.1_ASM1341886v1	feces	China: Jiangsu	pig
Acinetobacter_baumannii_MC31	Acinetobacter_baumannii_DSM_30007	97.6048	Acinetobacter baumannii	GCA_003595955.1	https://ftp.ncbi.nlm.nih.gov/genomes/all/GCA/003/595/955/GCA_003595955.1_ASM359595v1	Catheter	Bolivia: Cochabamba	Homo sapiens
Acinetobacter_baumannii_ABBL055	Acinetobacter_baumannii_JCM_6841	97.605	Acinetobacter baumannii	GCA_001414565.1	https://ftp.ncbi.nlm.nih.gov/genomes/all/GCA/001/414/565/GCA_001414565.1_ASM141456v1	Blood	USA: Chicago	Homo sapiens
Acinetobacter_indicus_AI23	Acinetobacter_indicus_CIP_110367	97.6063	Acinetobacter indicus	GCA_012366675.1	https://ftp.ncbi.nlm.nih.gov/genomes/all/GCA/012/366/675/GCA_012366675.1_ASM1236667v1	cow	China	blank
Acinetobacter_baumannii_ARLG1871	Acinetobacter_baumannii_ATCC_19606	97.6063	Acinetobacter baumannii	GCA_002144965.1	https://ftp.ncbi.nlm.nih.gov/genomes/all/GCA/002/144/965/GCA_002144965.1_ASM214496v1	blank	blank	blank
Acinetobacter_baumannii_ABE27_M	Acinetobacter_baumannii_DSM_30007	97.6064	Acinetobacter baumannii	GCA_900175175.1	https://ftp.ncbi.nlm.nih.gov/genomes/all/GCA/900/175/175/GCA_900175175.1_AE27M	blank	blank	blank
Acinetobacter_baumannii_ACIN00266	Acinetobacter_baumannii_DSM_30007	97.6064	Acinetobacter baumannii	GCA_016505985.1	https://ftp.ncbi.nlm.nih.gov/genomes/all/GCA/016/505/985/GCA_016505985.1_ASM1650598v1	wound	USA: Pittsburgh, Pennsylvania	Homo sapiens
Acinetobacter_baumannii_PM3665	Acinetobacter_baumannii_DSM_30007	97.6064	Acinetobacter baumannii	GCA_010500235.1	https://ftp.ncbi.nlm.nih.gov/genomes/all/GCA/010/500/235/GCA_010500235.1_ASM1050023v1	blood	India: NewDelhi	Homo sapiens
Acinetobacter_baumannii_ABBL072	Acinetobacter_baumannii_ATCC_19606	97.6068	Acinetobacter baumannii	GCA_001415355.1	https://ftp.ncbi.nlm.nih.gov/genomes/all/GCA/001/415/355/GCA_001415355.1_ASM141535v1	Blood	USA: Chicago	Homo sapiens
Acinetobacter_baumannii_Aci00717	Acinetobacter_baumannii_DSM_30007	97.6072	Acinetobacter baumannii	GCA_904885835.1	https://ftp.ncbi.nlm.nih.gov/genomes/all/GCA/904/885/835/GCA_904885835.1_Aci00717-181015_contigs_filtered.fa.gz	clinical material	blank	blank
Acinetobacter_baumannii_SP1917	Acinetobacter_baumannii_DSM_30007	97.6075	Acinetobacter baumannii	GCA_001077575.1	https://ftp.ncbi.nlm.nih.gov/genomes/all/GCA/001/077/575/GCA_001077575.1_ASM107757v1	sputum	India: Vellore	Homo sapiens
Acinetobacter_baumannii_AB_2008-15-69	Acinetobacter_baumannii_DSM_30007	97.6075	Acinetobacter baumannii	GCA_000301335.1	https://ftp.ncbi.nlm.nih.gov/genomes/all/GCA/000/301/335/GCA_000301335.1_ASM30133v1	blank	blank	blank
Acinetobacter_baumannii_KCRI-123C	Acinetobacter_baumannii_JCM_6841	97.6078	Acinetobacter baumannii	GCA_900406695.1	https://ftp.ncbi.nlm.nih.gov/genomes/all/GCA/900/406/695/GCA_900406695.1_De_novo_assembly_of_KCRI_isolate_R0004_123C	wound swab sample	blank	blank
Acinetobacter_baumannii_R1B	Acinetobacter_baumannii_DSM_30007	97.6078	Acinetobacter baumannii	GCA_000623035.1	https://ftp.ncbi.nlm.nih.gov/genomes/all/GCA/000/623/035/GCA_000623035.1_Acin_baum_R1B_V1	blank	Saudi Arabia: Riyadh Armed Forces Hospital, Riyadh	Homo sapiens
Acinetobacter_baumannii_ABBL014	Acinetobacter_baumannii_ATCC_19606	97.6082	Acinetobacter baumannii	GCA_001432425.1	https://ftp.ncbi.nlm.nih.gov/genomes/all/GCA/001/432/425/GCA_001432425.1_ASM143242v1	Blood	USA: Chicago	Homo sapiens
Acinetobacter_sp._YH12111	Acinetobacter_indicus_CIP_110367	97.6085	Acinetobacter indicus	GCA_013419015.1	https://ftp.ncbi.nlm.nih.gov/genomes/all/GCA/013/419/015/GCA_013419015.1_ASM1341901v1	feces	China: Jiangsu	pig
Acinetobacter_baumannii_15946	Acinetobacter_baumannii_DSM_30007	97.6087	Acinetobacter baumannii	GCA_017838235.1	https://ftp.ncbi.nlm.nih.gov/genomes/all/GCA/017/838/235/GCA_017838235.1_ASM1783823v1	stool	Nigeria	Homo sapiens
Acinetobacter_baumannii_BAL_255	Acinetobacter_baumannii_ATCC_19606	97.6089	Acinetobacter baumannii	GCA_900011275.1	https://ftp.ncbi.nlm.nih.gov/genomes/all/GCA/900/011/275/GCA_900011275.1_BAL_255_assembly	clinical sample	blank	Homo sapiens
Acinetobacter_sp._YH12224	Acinetobacter_indicus_CIP_110367	97.6092	Acinetobacter indicus	GCA_013417795.1	https://ftp.ncbi.nlm.nih.gov/genomes/all/GCA/013/417/795/GCA_013417795.1_ASM1341779v1	feces	China: Jiangsu	pig
Acinetobacter_indicus_AI24	Acinetobacter_indicus_CIP_110367	97.6096	Acinetobacter indicus	GCA_012366635.1	https://ftp.ncbi.nlm.nih.gov/genomes/all/GCA/012/366/635/GCA_012366635.1_ASM1236663v1	cow	China	blank
Acinetobacter_baumannii_4390	Acinetobacter_baumannii_DSM_30007	97.6096	Acinetobacter baumannii	GCA_001007765.1	https://ftp.ncbi.nlm.nih.gov/genomes/all/GCA/001/007/765/GCA_001007765.1_ASM100776v1	bronchial aspirate	Greece	Homo sapiens
Acinetobacter_junii_SC54	Acinetobacter_junii_CIP_64.5	97.6099	Acinetobacter junii	GCA_003293765.1	https://ftp.ncbi.nlm.nih.gov/genomes/all/GCA/003/293/765/GCA_003293765.1_ASM329376v1	Gold and copper mine	China	blank
Acinetobacter_sp._YH12237	Acinetobacter_towneri_DSM_14962	97.6103	Acinetobacter towneri	GCA_013417665.1	https://ftp.ncbi.nlm.nih.gov/genomes/all/GCA/013/417/665/GCA_013417665.1_ASM1341766v1	feces	China: Guangdong	pig
Acinetobacter_baumannii_ABBL067k	Acinetobacter_baumannii_JCM_6841	97.6112	Acinetobacter baumannii	GCA_001414985.1	https://ftp.ncbi.nlm.nih.gov/genomes/all/GCA/001/414/985/GCA_001414985.1_ASM141498v1	Blood	USA: Chicago	Homo sapiens
Acinetobacter_baumannii_ABBL043	Acinetobacter_baumannii_ATCC_19606	97.6114	Acinetobacter baumannii	GCA_001433275.1	https://ftp.ncbi.nlm.nih.gov/genomes/all/GCA/001/433/275/GCA_001433275.1_ASM143327v1	Blood	USA: Chicago	Homo sapiens
Acinetobacter_baumannii_EGD-HP18	Acinetobacter_baumannii_DSM_30007	97.612	Acinetobacter baumannii	GCA_000465635.2	https://ftp.ncbi.nlm.nih.gov/genomes/all/GCA/000/465/635/GCA_000465635.2_GS_De_Novo_Assembly	vegetable market soil	India: MS	blank
Acinetobacter_baumannii_UMB003	Acinetobacter_baumannii_DSM_30007	97.612	Acinetobacter baumannii	GCA_000184515.2	https://ftp.ncbi.nlm.nih.gov/genomes/all/GCA/000/184/515/GCA_000184515.2_ASM18451v2	wound	blank	Homo sapiens
Acinetobacter_sp._YH12254	Acinetobacter_pseudolwoffii_ANC_5044	97.6121	Acinetobacter pseudolwoffii	GCA_013417415.1	https://ftp.ncbi.nlm.nih.gov/genomes/all/GCA/013/417/415/GCA_013417415.1_ASM1341741v1	feces	China: Shanghai	pig
Acinetobacter_baumannii_B30	Acinetobacter_baumannii_DSM_30007	97.613	Acinetobacter baumannii	GCA_003130905.1	https://ftp.ncbi.nlm.nih.gov/genomes/all/GCA/003/130/905/GCA_003130905.1_ASM313090v1	blank	blank	blank
Acinetobacter_baumannii_YMC2012_9_R2209	Acinetobacter_baumannii_DSM_30007	97.613	Acinetobacter baumannii	GCA_003843775.1	https://ftp.ncbi.nlm.nih.gov/genomes/all/GCA/003/843/775/GCA_003843775.1_ASM384377v1	sputum	South Korea: Seoul	Homo sapiens
Acinetobacter_baumannii_PM4122	Acinetobacter_baumannii_DSM_30007	97.6133	Acinetobacter baumannii	GCA_010500565.1	https://ftp.ncbi.nlm.nih.gov/genomes/all/GCA/010/500/565/GCA_010500565.1_ASM1050056v1	blood	India: NewDelhi	Homo sapiens
Acinetobacter_sp._FDAARGOS_724	Acinetobacter_variabilis_NIPH_2171	97.6133	Acinetobacter variabilis	GCA_013364475.1	https://ftp.ncbi.nlm.nih.gov/genomes/all/GCA/013/364/475/GCA_013364475.1_ASM1336447v1	clinical isolate	USA: KY	Homo sapiens
Acinetobacter_baumannii_CCBH27270	Acinetobacter_baumannii_ATCC_19606	97.6134	Acinetobacter baumannii	GCA_016055835.1	https://ftp.ncbi.nlm.nih.gov/genomes/all/GCA/016/055/835/GCA_016055835.1_ASM1605583v1	Catheter Tip	Brazil	Homo sapiens
Acinetobacter_baumannii_R2091	Acinetobacter_baumannii_DSM_30007	97.6135	Acinetobacter baumannii	GCA_001517645.1	https://ftp.ncbi.nlm.nih.gov/genomes/all/GCA/001/517/645/GCA_001517645.1_R2091	tissue	blank	blank
Acinetobacter_baumannii_B8300	Acinetobacter_baumannii_DSM_30007	97.6137	Acinetobacter baumannii	GCA_001077965.2	https://ftp.ncbi.nlm.nih.gov/genomes/all/GCA/001/077/965/GCA_001077965.2_ASM107796v2	blood	India: Vellore	Homo sapiens
Acinetobacter_baumannii_XH827	Acinetobacter_baumannii_ATCC_19606	97.6139	Acinetobacter baumannii	GCA_001861935.1	https://ftp.ncbi.nlm.nih.gov/genomes/all/GCA/001/861/935/GCA_001861935.1_ASM186193v1	sputum	China: Hangzhou	Homo sapiens
Acinetobacter_baumannii_Ab-D10a-a	Acinetobacter_baumannii_DSM_30007	97.6141	Acinetobacter baumannii	GCA_012931625.1	https://ftp.ncbi.nlm.nih.gov/genomes/all/GCA/012/931/625/GCA_012931625.1_ASM1293162v1	cerebrospinal fluid	Ghana: Sekondi-Takoradi	Homo sapiens
Acinetobacter_baumannii_MRSN16880	Acinetobacter_baumannii_DSM_30007	97.6143	Acinetobacter baumannii	GCA_006494585.1	https://ftp.ncbi.nlm.nih.gov/genomes/all/GCA/006/494/585/GCA_006494585.1_ASM649458v1	blood	USA	Homo sapiens
Acinetobacter_baumannii_SP2128	Acinetobacter_baumannii_DSM_30007	97.6147	Acinetobacter baumannii	GCA_010499755.1	https://ftp.ncbi.nlm.nih.gov/genomes/all/GCA/010/499/755/GCA_010499755.1_ASM1049975v1	Endotracheal Aspirate	India: Vellore	Homo sapiens
Acinetobacter_ursingii_ANC_3649	Acinetobacter_ursingii_DSM_16037	97.6153	Acinetobacter ursingii	GCA_000368845.1	https://ftp.ncbi.nlm.nih.gov/genomes/all/GCA/000/368/845/GCA_000368845.1_Acin_ursi_NIPH_ANC_3649_V1	blank	blank	blank
Acinetobacter_nosocomialis_MGYG-HGUT-02345	Acinetobacter_nosocomialis_LMG_10619	97.6161	Acinetobacter nosocomialis	GCA_902386145.1	https://ftp.ncbi.nlm.nih.gov/genomes/all/GCA/902/386/145/GCA_902386145.1_UHGG_MGYG-HGUT-02345	human gut	blank	blank
Acinetobacter_sp._766875	Acinetobacter_nosocomialis_LMG_10619	97.6161	Acinetobacter nosocomialis	GCA_000582055.1	https://ftp.ncbi.nlm.nih.gov/genomes/all/GCA/000/582/055/GCA_000582055.1_ASM58205v1	perirectal	USA	Homo sapiens
Acinetobacter_pittii_UKK-0551	Acinetobacter_pittii_DSM_25618	97.6162	Acinetobacter pittii	GCA_001706285.1	https://ftp.ncbi.nlm.nih.gov/genomes/all/GCA/001/706/285/GCA_001706285.1_ASM170628v1	blank	Germany: somewhere in SN	Homo sapiens
Acinetobacter_baumannii_ACN21	Acinetobacter_baumannii_ATCC_19606	97.6163	Acinetobacter baumannii	GCA_004768705.1	https://ftp.ncbi.nlm.nih.gov/genomes/all/GCA/004/768/705/GCA_004768705.1_ASM476870v1	blood	India	Homosapiens
Acinetobacter_baumannii_Aci00859	Acinetobacter_baumannii_DSM_30007	97.6183	Acinetobacter baumannii	GCA_005819685.1	https://ftp.ncbi.nlm.nih.gov/genomes/all/GCA/005/819/685/GCA_005819685.1_ASM581968v1	wound swab	Germany: Heidelberg	Homo sapiens
Acinetobacter_baumannii_LAC-4	Acinetobacter_baumannii_DSM_30007	97.6184	Acinetobacter baumannii	GCA_000786735.1	https://ftp.ncbi.nlm.nih.gov/genomes/all/GCA/000/786/735/GCA_000786735.1_ASM78673v1	blank	USA: Los Angeles County, California	Homo sapiens
Acinetobacter_baumannii_IHIT17966	Acinetobacter_baumannii_ATCC_19606	97.6184	Acinetobacter baumannii	GCA_001704705.1	https://ftp.ncbi.nlm.nih.gov/genomes/all/GCA/001/704/705/GCA_001704705.1_ASM170470v1	blank	Germany	dog
Acinetobacter_sp._YH16058	Acinetobacter_towneri_DSM_14962	97.6191	Acinetobacter towneri	GCA_013417065.1	https://ftp.ncbi.nlm.nih.gov/genomes/all/GCA/013/417/065/GCA_013417065.1_ASM1341706v1	feces	China: Hunan	pig
Acinetobacter_baumannii_AB030	Acinetobacter_baumannii_ATCC_19606	97.6193	Acinetobacter baumannii	GCA_000746645.1	https://ftp.ncbi.nlm.nih.gov/genomes/all/GCA/000/746/645/GCA_000746645.1_ASM74664v1	Hospital	Canada: Winnipeg	Homo sapiens
Acinetobacter_pittii_ARLG1776	Acinetobacter_pittii_DSM_25618	97.6193	Acinetobacter pittii	GCA_002143415.1	https://ftp.ncbi.nlm.nih.gov/genomes/all/GCA/002/143/415/GCA_002143415.1_ASM214341v1	blank	blank	blank
Acinetobacter_baumannii_NM3	Acinetobacter_baumannii_DSM_30007	97.6196	Acinetobacter baumannii	GCA_001007725.1	https://ftp.ncbi.nlm.nih.gov/genomes/all/GCA/001/007/725/GCA_001007725.1_ASM100772v1	sputum	United Arab Emirates	Homo sapiens
Acinetobacter_baumannii_RCH52	Acinetobacter_baumannii_ATCC_19606	97.6197	Acinetobacter baumannii	GCA_020810655.1	https://ftp.ncbi.nlm.nih.gov/genomes/all/GCA/020/810/655/GCA_020810655.1_ASM2081065v1	blank	blank	blank
Acinetobacter_baumannii_A369	Acinetobacter_baumannii_CIP_70.34	97.6203	Acinetobacter baumannii	GCA_003130925.1	https://ftp.ncbi.nlm.nih.gov/genomes/all/GCA/003/130/925/GCA_003130925.1_ASM313092v1	blank	China	blank
Acinetobacter_baumannii_MRSN16896	Acinetobacter_baumannii_JCM_6841	97.6203	Acinetobacter baumannii	GCA_001441455.1	https://ftp.ncbi.nlm.nih.gov/genomes/all/GCA/001/441/455/GCA_001441455.1_ASM144145v1	sputum	USA: Alaska	Homo sapiens
Acinetobacter_baumannii_372_16	Acinetobacter_baumannii_DSM_30007	97.6205	Acinetobacter baumannii	GCA_015537525.1	https://ftp.ncbi.nlm.nih.gov/genomes/all/GCA/015/537/525/GCA_015537525.1_ASM1553752v1	Biological secretion	Brazil: Sao Paulo	Homo sapiens
Acinetobacter_baumannii_CIP70.10	Acinetobacter_baumannii_JCM_6841	97.6208	Acinetobacter baumannii	GCA_001457535.1	https://ftp.ncbi.nlm.nih.gov/genomes/all/GCA/001/457/535/GCA_001457535.1_CIP70.10	human skin tissue	blank	blank
Acinetobacter_nosocomialis_UBA6823	Acinetobacter_nosocomialis_NIPH_2119	97.6212	Acinetobacter nosocomialis	GCA_002452475.1	https://ftp.ncbi.nlm.nih.gov/genomes/all/GCA/002/452/475/GCA_002452475.1_ASM245247v1	metal	USA:New York City	blank
Acinetobacter_pittii_42F	Acinetobacter_pittii_ATCC_19004	97.6214	Acinetobacter pittii	GCA_000529235.1	https://ftp.ncbi.nlm.nih.gov/genomes/all/GCA/000/529/235/GCA_000529235.1_APIBUN_1	blank	blank	blank
Acinetobacter_baumannii_KAB15	Acinetobacter_baumannii_DSM_30007	97.6216	Acinetobacter baumannii	GCA_017169125.1	https://ftp.ncbi.nlm.nih.gov/genomes/all/GCA/017/169/125/GCA_017169125.1_ASM1716912v1	blank	Kenya: Kisumu	Homo sapiens
Acinetobacter_baumannii_1276470-86	Acinetobacter_baumannii_DSM_30007	97.6218	Acinetobacter baumannii	GCA_000588115.1	https://ftp.ncbi.nlm.nih.gov/genomes/all/GCA/000/588/115/GCA_000588115.1_ASM58811v1	sputum	USA	Homo sapiens
Acinetobacter_baumannii_BJ4	Acinetobacter_baumannii_DSM_30007	97.622	Acinetobacter baumannii	GCA_000787275.1	https://ftp.ncbi.nlm.nih.gov/genomes/all/GCA/000/787/275/GCA_000787275.1_ASM78727v1	sputum	China: Beijing	Homo sapiens
Acinetobacter_baumannii_SP1561	Acinetobacter_baumannii_DSM_30007	97.6221	Acinetobacter baumannii	GCA_010500385.1	https://ftp.ncbi.nlm.nih.gov/genomes/all/GCA/010/500/385/GCA_010500385.1_ASM1050038v1	Endotracheal Aspirate	India: Vellore	Homo sapiens
Acinetobacter_baumannii_ARLG1880	Acinetobacter_baumannii_ATCC_19606	97.6224	Acinetobacter baumannii	GCA_002144995.1	https://ftp.ncbi.nlm.nih.gov/genomes/all/GCA/002/144/995/GCA_002144995.1_ASM214499v1	blank	blank	blank
Acinetobacter_baumannii_MCR10126	Acinetobacter_baumannii_DSM_30007	97.6225	Acinetobacter baumannii	GCA_002927995.1	https://ftp.ncbi.nlm.nih.gov/genomes/all/GCA/002/927/995/GCA_002927995.1_ASM292799v1	Endobronchial tube	Honduras: Cortes, San Pedro Sula	Homo sapiens
Acinetobacter_baumannii_ABBL030	Acinetobacter_baumannii_ATCC_19606	97.6227	Acinetobacter baumannii	GCA_001432925.1	https://ftp.ncbi.nlm.nih.gov/genomes/all/GCA/001/432/925/GCA_001432925.1_ASM143292v1	Blood	USA: Chicago	Homo sapiens
Acinetobacter_baumannii_CAb-65	Acinetobacter_baumannii_ATCC_19606	97.623	Acinetobacter baumannii	GCA_019076685.1	https://ftp.ncbi.nlm.nih.gov/genomes/all/GCA/019/076/685/GCA_019076685.1_ASM1907668v1	Faecal	Malaysia	Homo sapiens
Acinetobacter_baumannii_G	Acinetobacter_baumannii_DSM_30007	97.6231	Acinetobacter baumannii	GCA_900042755.1	https://ftp.ncbi.nlm.nih.gov/genomes/all/GCA/900/042/755/GCA_900042755.1_acinetobacter_baumannii_isolate_strainG	tracheal secretion	blank	Homo sapiens
Acinetobacter_sp._ABNIH27	Acinetobacter_baumannii_JCM_6841	97.6236	Acinetobacter baumannii	GCA_002919905.1	https://ftp.ncbi.nlm.nih.gov/genomes/all/GCA/002/919/905/GCA_002919905.1_ASM291990v1	blank	USA	blank
Acinetobacter_junii_TUM15553	Acinetobacter_junii_CIP_64.5	97.6238	Acinetobacter junii	GCA_009013895.1	https://ftp.ncbi.nlm.nih.gov/genomes/all/GCA/009/013/895/GCA_009013895.1_ASM901389v1	human sputum	Japan:Kanagawa	Homo sapiens
Acinetobacter_baumannii_PR360	Acinetobacter_baumannii_JCM_6841	97.6239	Acinetobacter baumannii	GCA_002136955.1	https://ftp.ncbi.nlm.nih.gov/genomes/all/GCA/002/136/955/GCA_002136955.1_ASM213695v1	blank	blank	blank
Acinetobacter_sp._OIFC021	Acinetobacter_nosocomialis_LMG_10619	97.6244	Acinetobacter nosocomialis	GCA_000335575.1	https://ftp.ncbi.nlm.nih.gov/genomes/all/GCA/000/335/575/GCA_000335575.1_gacin41v1.0	trachea	USA: Walter Reed Army Medical Center, Washington, DC	Homo sapiens
Acinetobacter_sp._1566109	Acinetobacter_nosocomialis_NIPH_2119	97.6248	Acinetobacter nosocomialis	GCA_000582255.1	https://ftp.ncbi.nlm.nih.gov/genomes/all/GCA/000/582/255/GCA_000582255.1_ASM58225v1	perirectal	USA	Homo sapiens
Acinetobacter_baumannii_XH639	Acinetobacter_baumannii_ATCC_19606	97.6251	Acinetobacter baumannii	GCA_001863705.1	https://ftp.ncbi.nlm.nih.gov/genomes/all/GCA/001/863/705/GCA_001863705.1_ASM186370v1	sputum	China: Hangzhou	Homo sapiens
Acinetobacter_baumannii_KPC-SM-17a	Acinetobacter_baumannii_DSM_30007	97.6254	Acinetobacter baumannii	GCA_902705505.1	https://ftp.ncbi.nlm.nih.gov/genomes/all/GCA/902/705/505/GCA_902705505.1_ABKPCSM17a	blank	blank	blank
Acinetobacter_baumannii_CCBH27628	Acinetobacter_baumannii_DSM_30007	97.6259	Acinetobacter baumannii	GCA_016055485.1	https://ftp.ncbi.nlm.nih.gov/genomes/all/GCA/016/055/485/GCA_016055485.1_ASM1605548v1	blood	Brazil	Homo sapiens
Acinetobacter_baumannii_XH693	Acinetobacter_baumannii_ATCC_19606	97.6269	Acinetobacter baumannii	GCA_001864715.1	https://ftp.ncbi.nlm.nih.gov/genomes/all/GCA/001/864/715/GCA_001864715.1_ASM186471v1	sputum	China: Hangzhou	Homo sapiens
Acinetobacter_baumannii_OCU_Ac10	Acinetobacter_baumannii_DSM_30007	97.6272	Acinetobacter baumannii	GCA_003569625.1	https://ftp.ncbi.nlm.nih.gov/genomes/all/GCA/003/569/625/GCA_003569625.1_ASM356962v1	blood culture of a hospitalized patient	Japan:Osaka	Homo sapiens
Acinetobacter_baumannii_MC89	Acinetobacter_baumannii_DSM_30007	97.6273	Acinetobacter baumannii	GCA_003584425.1	https://ftp.ncbi.nlm.nih.gov/genomes/all/GCA/003/584/425/GCA_003584425.1_ASM358442v1	Ulcer	Bolivia: Cochabamba	Homo sapiens
Acinetobacter_baumannii_KCRI-309C	Acinetobacter_baumannii_ATCC_19606	97.6282	Acinetobacter baumannii	GCA_900406705.1	https://ftp.ncbi.nlm.nih.gov/genomes/all/GCA/900/406/705/GCA_900406705.1_De_novo_assembly_of_KCRI_isolate_RDK01_309C	wound swab sample	blank	blank
Acinetobacter_baumannii_17A1625	Acinetobacter_baumannii_ATCC_19606	97.6283	Acinetobacter baumannii	GCA_020254745.1	https://ftp.ncbi.nlm.nih.gov/genomes/all/GCA/020/254/745/GCA_020254745.1_ASM2025474v1	Rectal swab	France: Besancon	Homo sapiens
Acinetobacter_baumannii_NCSR_132	Acinetobacter_baumannii_DSM_30007	97.6285	Acinetobacter baumannii	GCA_900478075.2	https://ftp.ncbi.nlm.nih.gov/genomes/all/GCA/900/478/075/GCA_900478075.2_8290_3_93	blank	blank	blank
Acinetobacter_baumannii_ABBL011	Acinetobacter_baumannii_CIP_70.34	97.6289	Acinetobacter baumannii	GCA_001432455.1	https://ftp.ncbi.nlm.nih.gov/genomes/all/GCA/001/432/455/GCA_001432455.1_ASM143245v1	Blood	USA: Chicago	Homo sapiens
Acinetobacter_baumannii_KCRI-116	Acinetobacter_baumannii_JCM_6841	97.6294	Acinetobacter baumannii	GCA_900406645.1	https://ftp.ncbi.nlm.nih.gov/genomes/all/GCA/900/406/645/GCA_900406645.1_De_novo_assembly_of_KCRI_isolate_RDK02_116	wound swab sample	blank	blank
Acinetobacter_baumannii_MRSN16897	Acinetobacter_baumannii_ATCC_19606	97.6294	Acinetobacter baumannii	GCA_000972525.1	https://ftp.ncbi.nlm.nih.gov/genomes/all/GCA/000/972/525/GCA_000972525.1_ASM97252v1	blood	USA: Alaska	blank
Acinetobacter_baumannii_ARLG1864	Acinetobacter_baumannii_DSM_30007	97.6298	Acinetobacter baumannii	GCA_002144925.1	https://ftp.ncbi.nlm.nih.gov/genomes/all/GCA/002/144/925/GCA_002144925.1_ASM214492v1	blank	blank	blank
Acinetobacter_baumannii_214216	Acinetobacter_baumannii_ATCC_19606	97.6299	Acinetobacter baumannii	GCA_000587955.1	https://ftp.ncbi.nlm.nih.gov/genomes/all/GCA/000/587/955/GCA_000587955.1_ASM58795v1	sputum	USA	Homo sapiens
Acinetobacter_baumannii_763_16	Acinetobacter_baumannii_DSM_30007	97.63	Acinetobacter baumannii	GCA_015538305.1	https://ftp.ncbi.nlm.nih.gov/genomes/all/GCA/015/538/305/GCA_015538305.1_ASM1553830v1	blood	Brazil: Sao Paulo	Homo sapiens
Acinetobacter_baumannii_299505	Acinetobacter_baumannii_DSM_30007	97.6303	Acinetobacter baumannii	GCA_000580975.1	https://ftp.ncbi.nlm.nih.gov/genomes/all/GCA/000/580/975/GCA_000580975.1_ASM58097v1	perirectal	USA	Homo sapiens
Acinetobacter_baumannii_6200	Acinetobacter_baumannii_DSM_30007	97.6305	Acinetobacter baumannii	GCA_000814345.1	https://ftp.ncbi.nlm.nih.gov/genomes/all/GCA/000/814/345/GCA_000814345.1_ASM81434v1	Bodily fluid	Colombia	Homo sapiens
Acinetobacter_baumannii_ABBL067	Acinetobacter_baumannii_ATCC_19606	97.6307	Acinetobacter baumannii	GCA_001414765.1	https://ftp.ncbi.nlm.nih.gov/genomes/all/GCA/001/414/765/GCA_001414765.1_ASM141476v1	Blood	USA: Chicago	Homo sapiens
Acinetobacter_baumannii_MRSN11695	Acinetobacter_baumannii_DSM_30007	97.6315	Acinetobacter baumannii	GCA_006493765.1	https://ftp.ncbi.nlm.nih.gov/genomes/all/GCA/006/493/765/GCA_006493765.1_ASM649376v1	urine	USA	Homo sapiens
Acinetobacter_pittii_PR346	Acinetobacter_pittii_DSM_25618	97.6315	Acinetobacter pittii	GCA_002137885.1	https://ftp.ncbi.nlm.nih.gov/genomes/all/GCA/002/137/885/GCA_002137885.1_ASM213788v1	blank	blank	blank
Acinetobacter_baumannii_B8342	Acinetobacter_baumannii_ATCC_19606	97.6317	Acinetobacter baumannii	GCA_001077555.2	https://ftp.ncbi.nlm.nih.gov/genomes/all/GCA/001/077/555/GCA_001077555.2_ASM107755v2	blood	India: Vellore	Homo sapiens
Acinetobacter_pittii_IHIT29592	Acinetobacter_pittii_DSM_25618	97.6318	Acinetobacter pittii	GCA_002740785.1	https://ftp.ncbi.nlm.nih.gov/genomes/all/GCA/002/740/785/GCA_002740785.1_ASM274078v1	blank	Germany	cat
Acinetobacter_baumannii_SP2210	Acinetobacter_baumannii_DSM_30007	97.6318	Acinetobacter baumannii	GCA_010499835.1	https://ftp.ncbi.nlm.nih.gov/genomes/all/GCA/010/499/835/GCA_010499835.1_ASM1049983v1	Endotracheal Aspirate	India: Vellore	Homo sapiens
Acinetobacter_baumannii_PR333	Acinetobacter_baumannii_DSM_30007	97.6323	Acinetobacter baumannii	GCA_002137645.1	https://ftp.ncbi.nlm.nih.gov/genomes/all/GCA/002/137/645/GCA_002137645.1_ASM213764v1	blank	blank	blank
Acinetobacter_baumannii_AE3M	Acinetobacter_baumannii_ATCC_19606	97.6323	Acinetobacter baumannii	GCA_900169915.1	https://ftp.ncbi.nlm.nih.gov/genomes/all/GCA/900/169/915/GCA_900169915.1_ASM90016991v1	blank	blank	blank
Acinetobacter_baumannii_MRSN15574	Acinetobacter_baumannii_DSM_30007	97.6324	Acinetobacter baumannii	GCA_006494565.1	https://ftp.ncbi.nlm.nih.gov/genomes/all/GCA/006/494/565/GCA_006494565.1_ASM649456v1	respiratory	Germany	Homo sapiens
Acinetobacter_sp._YH12222	Acinetobacter_indicus_CIP_110367	97.6329	Acinetobacter indicus	GCA_013417885.1	https://ftp.ncbi.nlm.nih.gov/genomes/all/GCA/013/417/885/GCA_013417885.1_ASM1341788v1	feces	China: Jiangsu	pig
Acinetobacter_baumannii_3159	Acinetobacter_baumannii_DSM_30007	97.6336	Acinetobacter baumannii	GCA_016635075.1	https://ftp.ncbi.nlm.nih.gov/genomes/all/GCA/016/635/075/GCA_016635075.1_ASM1663507v1	Surgical wound	Benin	Homo sapiens
Acinetobacter_baumannii_PR340	Acinetobacter_baumannii_DSM_30007	97.6342	Acinetobacter baumannii	GCA_002137755.1	https://ftp.ncbi.nlm.nih.gov/genomes/all/GCA/002/137/755/GCA_002137755.1_ASM213775v1	blank	blank	blank
Acinetobacter_sp._YH12252	Acinetobacter_towneri_DSM_14962	97.6347	Acinetobacter towneri	GCA_013417365.1	https://ftp.ncbi.nlm.nih.gov/genomes/all/GCA/013/417/365/GCA_013417365.1_ASM1341736v1	feces	China: Guangdong	pig
Acinetobacter_baumannii_MRSN1551	Acinetobacter_baumannii_DSM_30007	97.6349	Acinetobacter baumannii	GCA_006493835.1	https://ftp.ncbi.nlm.nih.gov/genomes/all/GCA/006/493/835/GCA_006493835.1_ASM649383v1	groin	USA	Homo sapiens
Acinetobacter_baumannii_MC100	Acinetobacter_baumannii_DSM_30007	97.6352	Acinetobacter baumannii	GCA_003584315.1	https://ftp.ncbi.nlm.nih.gov/genomes/all/GCA/003/584/315/GCA_003584315.1_ASM358431v1	Tracheal secretion	Bolivia: Cochabamba	Homo sapiens
Acinetobacter_baumannii_4300STDY7045700	Acinetobacter_baumannii_DSM_30007	97.6357	Acinetobacter baumannii	GCA_900494975.1	https://ftp.ncbi.nlm.nih.gov/genomes/all/GCA/900/494/975/GCA_900494975.1_24276_2_166	blank	blank	blank
Acinetobacter_ursingii_MGYG-HGUT-02341	Acinetobacter_ursingii_DSM_16037	97.6366	Acinetobacter ursingii	GCA_902386035.1	https://ftp.ncbi.nlm.nih.gov/genomes/all/GCA/902/386/035/GCA_902386035.1_UHGG_MGYG-HGUT-02341	human gut	blank	blank
Acinetobacter_sp._479375	Acinetobacter_ursingii_DSM_16037	97.6366	Acinetobacter ursingii	GCA_000581715.1	https://ftp.ncbi.nlm.nih.gov/genomes/all/GCA/000/581/715/GCA_000581715.1_ASM58171v1	perirectal	USA	Homo sapiens
Acinetobacter_baumannii_4300STDY7045872	Acinetobacter_baumannii_ATCC_19606	97.6368	Acinetobacter baumannii	GCA_900496525.1	https://ftp.ncbi.nlm.nih.gov/genomes/all/GCA/900/496/525/GCA_900496525.1_24276_3_30	blank	blank	blank
Acinetobacter_baumannii_Lah-14	Acinetobacter_baumannii_DSM_30007	97.6368	Acinetobacter baumannii	GCA_003345965.1	https://ftp.ncbi.nlm.nih.gov/genomes/all/GCA/003/345/965/GCA_003345965.1_ASM334596v1	Tracheal Secretions	Pakistan: Lahore	Homo sapiens
Acinetobacter_baumannii_TG87880	Acinetobacter_baumannii_DSM_30007	97.6378	Acinetobacter baumannii	GCA_003948385.1	https://ftp.ncbi.nlm.nih.gov/genomes/all/GCA/003/948/385/GCA_003948385.1_ASM394838v1	ear	blank	Homo sapiens
Acinetobacter_baumannii_K	Acinetobacter_baumannii_DSM_30007	97.6378	Acinetobacter baumannii	GCA_900043995.1	https://ftp.ncbi.nlm.nih.gov/genomes/all/GCA/900/043/995/GCA_900043995.1_acinetobacter_baumannii_isolate_strainK	blood culture	blank	Homo sapiens
Acinetobacter_baumannii_ACIN00236	Acinetobacter_baumannii_DSM_30007	97.6379	Acinetobacter baumannii	GCA_016506385.1	https://ftp.ncbi.nlm.nih.gov/genomes/all/GCA/016/506/385/GCA_016506385.1_ASM1650638v1	Tissue	USA: Pittsburgh, Pennsylvania	Homo sapiens
Acinetobacter_baumannii_KCRI-186	Acinetobacter_baumannii_DSM_30007	97.638	Acinetobacter baumannii	GCA_900406665.1	https://ftp.ncbi.nlm.nih.gov/genomes/all/GCA/900/406/665/GCA_900406665.1_De_novo_assembly_of_KCRI_isolate_RDK03_186	wound swab sample	blank	blank
Acinetobacter_baumannii_1170863	Acinetobacter_baumannii_DSM_30007	97.6387	Acinetobacter baumannii	GCA_000588615.1	https://ftp.ncbi.nlm.nih.gov/genomes/all/GCA/000/588/615/GCA_000588615.1_ASM58861v1	sputum	USA	Homo sapiens
Acinetobacter_baumannii_MC22	Acinetobacter_baumannii_DSM_30007	97.6387	Acinetobacter baumannii	GCA_003584505.1	https://ftp.ncbi.nlm.nih.gov/genomes/all/GCA/003/584/505/GCA_003584505.1_ASM358450v1	Bronchial Secretion	Bolivia: Cochabamba	Homo sapiens
Acinetobacter_septicus_FDAARGOS_1401	Acinetobacter_ursingii_DSM_16037	97.6387	Acinetobacter ursingii	GCA_019355975.1	https://ftp.ncbi.nlm.nih.gov/genomes/all/GCA/019/355/975/GCA_019355975.1_ASM1935597v1	DSMZ isolate	Germany: Braunschweig	blank
Acinetobacter_baumannii_607805	Acinetobacter_baumannii_ATCC_19606	97.639	Acinetobacter baumannii	GCA_000584315.1	https://ftp.ncbi.nlm.nih.gov/genomes/all/GCA/000/584/315/GCA_000584315.1_ASM58431v1	perirectal	USA	Homo sapiens
Acinetobacter_indicus_C15_T	Acinetobacter_indicus_CIP_110367	97.6392	Acinetobacter indicus	GCA_015217905.1	https://ftp.ncbi.nlm.nih.gov/genomes/all/GCA/015/217/905/GCA_015217905.1_ASM1521790v1	feces	China: Guangdong	Pig
Acinetobacter_pittii_AP436	Acinetobacter_pittii_DSM_25618	97.6397	Acinetobacter pittii	GCA_016522335.1	https://ftp.ncbi.nlm.nih.gov/genomes/all/GCA/016/522/335/GCA_016522335.1_ASM1652233v1	sputum	Thailand: Roi ed	Homo sapiens
Acinetobacter_baumannii_MRSN16875	Acinetobacter_baumannii_ATCC_19606	97.6397	Acinetobacter baumannii	GCA_000972625.1	https://ftp.ncbi.nlm.nih.gov/genomes/all/GCA/000/972/625/GCA_000972625.1_ASM97262v1	sputum	USA: Alaska	Homo sapiens
Acinetobacter_baumannii_ABS078	Acinetobacter_baumannii_DSM_30007	97.6401	Acinetobacter baumannii	GCA_009497535.1	https://ftp.ncbi.nlm.nih.gov/genomes/all/GCA/009/497/535/GCA_009497535.1_ASM949753v1	wound	Iran	Homo sapiens
Acinetobacter_baumannii_1188188	Acinetobacter_baumannii_DSM_30007	97.6404	Acinetobacter baumannii	GCA_000584635.1	https://ftp.ncbi.nlm.nih.gov/genomes/all/GCA/000/584/635/GCA_000584635.1_ASM58463v1	sputum	USA	Homo sapiens
Acinetobacter_sp._S2_018_000_R2_105	Acinetobacter_ursingii_DSM_16037	97.6406	Acinetobacter ursingii	GCA_003248375.1	https://ftp.ncbi.nlm.nih.gov/genomes/all/GCA/003/248/375/GCA_003248375.1_ASM324837v1	hospital NICU surfaces and sink samples	USA: Pittsburgh	blank
Acinetobacter_nosocomialis_AC15181	Acinetobacter_nosocomialis_NIPH_2119	97.6408	Acinetobacter nosocomialis	GCA_017837795.1	https://ftp.ncbi.nlm.nih.gov/genomes/all/GCA/017/837/795/GCA_017837795.1_ASM1783779v1	blood	Malaysia	Homo sapiens
Acinetobacter_baumannii_961_16	Acinetobacter_baumannii_ATCC_19606	97.6414	Acinetobacter baumannii	GCA_015537605.1	https://ftp.ncbi.nlm.nih.gov/genomes/all/GCA/015/537/605/GCA_015537605.1_ASM1553760v1	blood	Brazil: Sao Paulo	Homo sapiens
Acinetobacter_baumannii_UPAB1	Acinetobacter_baumannii_DSM_30007	97.6418	Acinetobacter baumannii	GCA_006843645.1	https://ftp.ncbi.nlm.nih.gov/genomes/all/GCA/006/843/645/GCA_006843645.1_ASM684364v1	urine	Argentina: Buenos Aires, San Andres, Hospital Zonal General de Agudos 'General Manuel Belgrano', Zip B1604BSB	Homo sapiens
Acinetobacter_indicus_AI32	Acinetobacter_indicus_CIP_110367	97.6421	Acinetobacter indicus	GCA_012371015.1	https://ftp.ncbi.nlm.nih.gov/genomes/all/GCA/012/371/015/GCA_012371015.1_ASM1237101v1	cow	China	blank
Acinetobacter_baumannii_512_16	Acinetobacter_baumannii_ATCC_19606	97.6423	Acinetobacter baumannii	GCA_015537095.1	https://ftp.ncbi.nlm.nih.gov/genomes/all/GCA/015/537/095/GCA_015537095.1_ASM1553709v1	Eye discharge	Brazil: Sao Paulo	Homo sapiens
Acinetobacter_baumannii_162912	Acinetobacter_baumannii_DSM_30007	97.6424	Acinetobacter baumannii	GCA_014560325.1	https://ftp.ncbi.nlm.nih.gov/genomes/all/GCA/014/560/325/GCA_014560325.1_ASM1456032v1	blood	China	Homo sapiens
Acinetobacter_baumannii_ABBL067l	Acinetobacter_baumannii_DSM_30007	97.6425	Acinetobacter baumannii	GCA_001415015.1	https://ftp.ncbi.nlm.nih.gov/genomes/all/GCA/001/415/015/GCA_001415015.1_ASM141501v1	Blood	USA: Chicago	Homo sapiens
Acinetobacter_baumannii_625974	Acinetobacter_baumannii_ATCC_19606	97.6426	Acinetobacter baumannii	GCA_000581255.1	https://ftp.ncbi.nlm.nih.gov/genomes/all/GCA/000/581/255/GCA_000581255.1_ASM58125v1	perirectal	USA	Homo sapiens
Acinetobacter_baumannii_1121032	Acinetobacter_baumannii_DSM_30007	97.6427	Acinetobacter baumannii	GCA_000580355.2	https://ftp.ncbi.nlm.nih.gov/genomes/all/GCA/000/580/355/GCA_000580355.2_ASM58035v2	perirectal	USA	Homo sapiens
Acinetobacter_baumannii_4300STDY7045882	Acinetobacter_baumannii_DSM_30007	97.6428	Acinetobacter baumannii	GCA_900496475.1	https://ftp.ncbi.nlm.nih.gov/genomes/all/GCA/900/496/475/GCA_900496475.1_24276_3_39	blank	blank	blank
Acinetobacter_baumannii_NFAb2	Acinetobacter_baumannii_DSM_30007	97.643	Acinetobacter baumannii	GCA_009910215.1	https://ftp.ncbi.nlm.nih.gov/genomes/all/GCA/009/910/215/GCA_009910215.1_ASM991021v1	tissue	USA: University of Chicago	Homo sapiens
Acinetobacter_baumannii_ACMH-6201	Acinetobacter_baumannii_ATCC_19606	97.643	Acinetobacter baumannii	GCA_001432275.1	https://ftp.ncbi.nlm.nih.gov/genomes/all/GCA/001/432/275/GCA_001432275.1_ASM143227v1	blank	Lebanon	Homo sapiens
Acinetobacter_baumannii_XH828	Acinetobacter_baumannii_DSM_30007	97.6432	Acinetobacter baumannii	GCA_001861955.1	https://ftp.ncbi.nlm.nih.gov/genomes/all/GCA/001/861/955/GCA_001861955.1_ASM186195v1	sputum	China: Hangzhou	Homo sapiens
Acinetobacter_baumannii_29FS20	Acinetobacter_baumannii_ATCC_19606	97.6434	Acinetobacter baumannii	GCA_013394285.1	https://ftp.ncbi.nlm.nih.gov/genomes/all/GCA/013/394/285/GCA_013394285.1_ASM1339428v1	feces	China:Guangdong	duck
Acinetobacter_baumannii_AB-C	Acinetobacter_baumannii_DSM_30007	97.6437	Acinetobacter baumannii	GCA_002006655.1	https://ftp.ncbi.nlm.nih.gov/genomes/all/GCA/002/006/655/GCA_002006655.1_ASM200665v1	wound swab	Ethiopia	Homo sapiens
Acinetobacter_pseudolwoffii_Acilw_F78	Acinetobacter_pseudolwoffii_ANC_5044	97.644	Acinetobacter pseudolwoffii	GCA_900088145.1	https://ftp.ncbi.nlm.nih.gov/genomes/all/GCA/900/088/145/GCA_900088145.1_Acinetobacter_lwoffi_F78	blank	blank	blank
Acinetobacter_baumannii_LWSS-_03-02-11A	Acinetobacter_baumannii_DSM_30007	97.6441	Acinetobacter baumannii	GCA_005298065.1	https://ftp.ncbi.nlm.nih.gov/genomes/all/GCA/005/298/065/GCA_005298065.1_ASM529806v1	water	Germany	blank
Acinetobacter_sp._Q22-2	Acinetobacter_indicus_CIP_110367	97.6442	Acinetobacter indicus	GCA_013420625.1	https://ftp.ncbi.nlm.nih.gov/genomes/all/GCA/013/420/625/GCA_013420625.1_ASM1342062v1	feces	China: Qinghai	migratory bird
Acinetobacter_baumannii_OCU_Ac2	Acinetobacter_baumannii_DSM_30007	97.6442	Acinetobacter baumannii	GCA_003569445.1	https://ftp.ncbi.nlm.nih.gov/genomes/all/GCA/003/569/445/GCA_003569445.1_ASM356944v1	blood culture of a hospitalized patient	Japan:Osaka	Homo sapiens
Acinetobacter_baumannii_MRSN6269	Acinetobacter_baumannii_DSM_30007	97.6451	Acinetobacter baumannii	GCA_001444255.1	https://ftp.ncbi.nlm.nih.gov/genomes/all/GCA/001/444/255/GCA_001444255.1_ASM144425v1	sputum	USA: Maryland, Bethesda	Homo sapiens
Acinetobacter_baumannii_1429530	Acinetobacter_baumannii_JCM_6841	97.6452	Acinetobacter baumannii	GCA_000581135.1	https://ftp.ncbi.nlm.nih.gov/genomes/all/GCA/000/581/135/GCA_000581135.1_ASM58113v1	perirectal	USA	Homo sapiens
Acinetobacter_baumannii_KAB25	Acinetobacter_baumannii_CIP_70.34	97.6453	Acinetobacter baumannii	GCA_017168635.1	https://ftp.ncbi.nlm.nih.gov/genomes/all/GCA/017/168/635/GCA_017168635.1_ASM1716863v1	blank	Kenya: Kericho	Homo sapiens
Acinetobacter_baumannii_TG00314	Acinetobacter_baumannii_DSM_30007	97.6458	Acinetobacter baumannii	GCA_000453725.1	https://ftp.ncbi.nlm.nih.gov/genomes/all/GCA/000/453/725/GCA_000453725.1_ASM45372v1	pus	blank	Homo sapiens
Acinetobacter_baumannii_ABUH360	Acinetobacter_baumannii_ATCC_19606	97.646	Acinetobacter baumannii	GCA_002183925.1	https://ftp.ncbi.nlm.nih.gov/genomes/all/GCA/002/183/925/GCA_002183925.1_ASM218392v1	tracheal aspirate	USA	Homo sapiens
Acinetobacter_sp._NBRC_100985	Acinetobacter_venetianus_RAG-1	97.646	Acinetobacter venetianus	GCA_000241225.2	https://ftp.ncbi.nlm.nih.gov/genomes/all/GCA/000/241/225/GCA_000241225.2_ASM24122v2	blank	blank	blank
Acinetobacter_baumannii_MC47	Acinetobacter_baumannii_ATCC_19606	97.6464	Acinetobacter baumannii	GCA_003596165.1	https://ftp.ncbi.nlm.nih.gov/genomes/all/GCA/003/596/165/GCA_003596165.1_ASM359616v1	Tracheal secretion	Bolivia: Cochabamba	Homo sapiens
Acinetobacter_baumannii_MRSN20315	Acinetobacter_baumannii_DSM_30007	97.6468	Acinetobacter baumannii	GCA_001441555.1	https://ftp.ncbi.nlm.nih.gov/genomes/all/GCA/001/441/555/GCA_001441555.1_ASM144155v1	perineum	USA: Washington, DC	Homo sapiens
Acinetobacter_baumannii_Pesh-27	Acinetobacter_baumannii_DSM_30007	97.6476	Acinetobacter baumannii	GCA_004357105.1	https://ftp.ncbi.nlm.nih.gov/genomes/all/GCA/004/357/105/GCA_004357105.1_ASM435710v1	Nasobronchial lavage	Pakistan: Peshawar	Homo sapiens
Acinetobacter_indicus_MMS9-2	Acinetobacter_indicus_CIP_110367	97.6478	Acinetobacter indicus	GCA_010918195.1	https://ftp.ncbi.nlm.nih.gov/genomes/all/GCA/010/918/195/GCA_010918195.1_ASM1091819v1	soil	China:Maoming City, Guangdong Province	blank
Acinetobacter_baumannii_C3T1-2	Acinetobacter_baumannii_CIP_70.34	97.6479	Acinetobacter baumannii	GCA_004152685.1	https://ftp.ncbi.nlm.nih.gov/genomes/all/GCA/004/152/685/GCA_004152685.1_ASM415268v1	manure	Canada: Sherbrooke	Bos taurus
Acinetobacter_baumannii_GB1-2	Acinetobacter_baumannii_DSM_30007	97.6484	Acinetobacter baumannii	GCA_002573795.1	https://ftp.ncbi.nlm.nih.gov/genomes/all/GCA/002/573/795/GCA_002573795.1_ASM257379v1	blank	Germany	chicken
Acinetobacter_baumannii_36-1512	Acinetobacter_baumannii_DSM_30007	97.6484	Acinetobacter baumannii	GCA_013787185.1	https://ftp.ncbi.nlm.nih.gov/genomes/all/GCA/013/787/185/GCA_013787185.1_ASM1378718v1	respiratory tract	Russia: Moscow	Homo sapiens
Acinetobacter_baumannii_BAL_266	Acinetobacter_baumannii_DSM_30007	97.6486	Acinetobacter baumannii	GCA_900011285.1	https://ftp.ncbi.nlm.nih.gov/genomes/all/GCA/900/011/285/GCA_900011285.1_BAL_266_Assembly	clinical sample	blank	Homo sapiens
Acinetobacter_baumannii_ABS201	Acinetobacter_baumannii_DSM_30007	97.6489	Acinetobacter baumannii	GCA_009268055.1	https://ftp.ncbi.nlm.nih.gov/genomes/all/GCA/009/268/055/GCA_009268055.1_ASM926805v1	Wound sample	Iran	Homo sapiens
Acinetobacter_baumannii_Aci00891	Acinetobacter_baumannii_DSM_30007	97.649	Acinetobacter baumannii	GCA_904887595.1	https://ftp.ncbi.nlm.nih.gov/genomes/all/GCA/904/887/595/GCA_904887595.1_Aci00891-181025_contigs_filtered.fa.gz	clinical material	blank	blank
Acinetobacter_baumannii_CCBH27570	Acinetobacter_baumannii_CIP_70.34	97.649	Acinetobacter baumannii	GCA_016055595.1	https://ftp.ncbi.nlm.nih.gov/genomes/all/GCA/016/055/595/GCA_016055595.1_ASM1605559v1	blood	Brazil	Homo sapiens
Acinetobacter_baumannii_ICU40	Acinetobacter_baumannii_DSM_30007	97.6495	Acinetobacter baumannii	GCA_019891095.1	https://ftp.ncbi.nlm.nih.gov/genomes/all/GCA/019/891/095/GCA_019891095.1_ASM1989109v1	cerebrospinal fluid	Jordan: Amman	Homo sapiens
Acinetobacter_baumannii_MRSN21660	Acinetobacter_baumannii_DSM_30007	97.6495	Acinetobacter baumannii	GCA_006494015.1	https://ftp.ncbi.nlm.nih.gov/genomes/all/GCA/006/494/015/GCA_006494015.1_ASM649401v1	wound	Honduras	Homo sapiens
Acinetobacter_sp._72431	Acinetobacter_pittii_DSM_25618	97.6497	Acinetobacter pittii	GCA_000682355.1	https://ftp.ncbi.nlm.nih.gov/genomes/all/GCA/000/682/355/GCA_000682355.1_ASM68235v1	perirectal	USA	Homo sapiens
Acinetobacter_nosocomialis_UBA2048	Acinetobacter_nosocomialis_NIPH_2119	97.6497	Acinetobacter nosocomialis	GCA_002332705.1	https://ftp.ncbi.nlm.nih.gov/genomes/all/GCA/002/332/705/GCA_002332705.1_ASM233270v1	metal/plastic	USA:New York City	blank
Acinetobacter_baumannii_AC1532	Acinetobacter_baumannii_DSM_30007	97.6499	Acinetobacter baumannii	GCA_017349055.1	https://ftp.ncbi.nlm.nih.gov/genomes/all/GCA/017/349/055/GCA_017349055.1_ASM1734905v1	blood	Malaysia	Homo sapiens
Acinetobacter_baumannii_ABBL037	Acinetobacter_baumannii_DSM_30007	97.65	Acinetobacter baumannii	GCA_001432975.1	https://ftp.ncbi.nlm.nih.gov/genomes/all/GCA/001/432/975/GCA_001432975.1_ASM143297v1	Blood	USA: Chicago	Homo sapiens
Acinetobacter_baumannii_ABBL067j	Acinetobacter_baumannii_DSM_30007	97.6502	Acinetobacter baumannii	GCA_001415325.1	https://ftp.ncbi.nlm.nih.gov/genomes/all/GCA/001/415/325/GCA_001415325.1_ASM141532v1	Blood	USA: Chicago	Homo sapiens
Acinetobacter_baumannii_B	Acinetobacter_baumannii_DSM_30007	97.6505	Acinetobacter baumannii	GCA_900020545.1	https://ftp.ncbi.nlm.nih.gov/genomes/all/GCA/900/020/545/GCA_900020545.1_acinetobacter_baumannii_isolate_strainB	tracheal secretion	blank	Homo sapiens
Acinetobacter_baumannii_ARLG1326	Acinetobacter_baumannii_DSM_30007	97.6509	Acinetobacter baumannii	GCA_002143885.1	https://ftp.ncbi.nlm.nih.gov/genomes/all/GCA/002/143/885/GCA_002143885.1_ASM214388v1	blank	blank	blank
Acinetobacter_baumannii_I	Acinetobacter_baumannii_DSM_30007	97.6511	Acinetobacter baumannii	GCA_900029375.1	https://ftp.ncbi.nlm.nih.gov/genomes/all/GCA/900/029/375/GCA_900029375.1_acinetobacter_baumannii_isolate_strainI	tracheal secretion	blank	Homo sapiens
Acinetobacter_baumannii_PR323	Acinetobacter_baumannii_DSM_30007	97.6511	Acinetobacter baumannii	GCA_002137495.1	https://ftp.ncbi.nlm.nih.gov/genomes/all/GCA/002/137/495/GCA_002137495.1_ASM213749v1	blank	blank	blank
Acinetobacter_baumannii_VB2486	Acinetobacter_baumannii_DSM_30007	97.6514	Acinetobacter baumannii	GCA_012935005.1	https://ftp.ncbi.nlm.nih.gov/genomes/all/GCA/012/935/005/GCA_012935005.1_ASM1293500v1	sputum	India	Homo sapiens
Acinetobacter_baumannii_1413735	Acinetobacter_baumannii_CIP_70.34	97.6519	Acinetobacter baumannii	GCA_000588775.1	https://ftp.ncbi.nlm.nih.gov/genomes/all/GCA/000/588/775/GCA_000588775.1_ASM58877v1	sputum	USA	Homo sapiens
Acinetobacter_baumannii_WKA02	Acinetobacter_baumannii_ATCC_19606	97.652	Acinetobacter baumannii	GCA_002082805.1	https://ftp.ncbi.nlm.nih.gov/genomes/all/GCA/002/082/805/GCA_002082805.1_ASM208280v1	sputum	South Korea: Jeonju	Homo sapiens
Acinetobacter_pittii_ABBL047	Acinetobacter_pittii_ATCC_19004	97.6521	Acinetobacter pittii	GCA_001433225.1	https://ftp.ncbi.nlm.nih.gov/genomes/all/GCA/001/433/225/GCA_001433225.1_ASM143322v1	Blood	USA: Chicago	Homo sapiens
Acinetobacter_baumannii_NIPH_146	Acinetobacter_baumannii_DSM_30007	97.6522	Acinetobacter baumannii	GCA_000368185.1	https://ftp.ncbi.nlm.nih.gov/genomes/all/GCA/000/368/185/GCA_000368185.1_Acin_baum_NIPH_146_V1	blank	blank	blank
Acinetobacter_baumannii_2011TJAB1	Acinetobacter_baumannii_ATCC_19606	97.6524	Acinetobacter baumannii	GCA_000805135.1	https://ftp.ncbi.nlm.nih.gov/genomes/all/GCA/000/805/135/GCA_000805135.1_ASM80513v1	blood	China: Tianjin	Homo sapiens
Acinetobacter_baumannii_4300STDY7045780	Acinetobacter_baumannii_ATCC_19606	97.6527	Acinetobacter baumannii	GCA_900495635.1	https://ftp.ncbi.nlm.nih.gov/genomes/all/GCA/900/495/635/GCA_900495635.1_24276_2_245	blank	blank	blank
Acinetobacter_baumannii_MRSN15038	Acinetobacter_baumannii_ATCC_19606	97.6527	Acinetobacter baumannii	GCA_001441545.1	https://ftp.ncbi.nlm.nih.gov/genomes/all/GCA/001/441/545/GCA_001441545.1_ASM144154v1	tracheal mucosa	USA: Washington, DC	Homo sapiens
Acinetobacter_pittii_ABBL010	Acinetobacter_pittii_DSM_25618	97.6529	Acinetobacter pittii	GCA_001432775.1	https://ftp.ncbi.nlm.nih.gov/genomes/all/GCA/001/432/775/GCA_001432775.1_ASM143277v1	Blood	USA: Chicago	Homo sapiens
Acinetobacter_baumannii_FK_2016_47	Acinetobacter_baumannii_DSM_30007	97.653	Acinetobacter baumannii	GCA_009760485.1	https://ftp.ncbi.nlm.nih.gov/genomes/all/GCA/009/760/485/GCA_009760485.1_ASM976048v1	sputum	Greece	Homo sapiens
Acinetobacter_pittii_UKK-0549	Acinetobacter_pittii_DSM_25618	97.6536	Acinetobacter pittii	GCA_001706425.1	https://ftp.ncbi.nlm.nih.gov/genomes/all/GCA/001/706/425/GCA_001706425.1_ASM170642v1	blank	Germany: somewhere in SN	Homo sapiens
Acinetobacter_pittii_IHIT32473	Acinetobacter_pittii_ATCC_19004	97.6536	Acinetobacter pittii	GCA_002740735.1	https://ftp.ncbi.nlm.nih.gov/genomes/all/GCA/002/740/735/GCA_002740735.1_ASM274073v1	blank	Germany	dog
Acinetobacter_baumannii_13	Acinetobacter_baumannii_DSM_30007	97.6539	Acinetobacter baumannii	GCA_002245595.1	https://ftp.ncbi.nlm.nih.gov/genomes/all/GCA/002/245/595/GCA_002245595.1_ASM224559v1	tracheal aspirate	Brazil: Uberlandia, MG	Homo sapiens
Acinetobacter_sp._YH12102	Acinetobacter_pseudolwoffii_ANC_5044	97.6539	Acinetobacter pseudolwoffii	GCA_013419125.1	https://ftp.ncbi.nlm.nih.gov/genomes/all/GCA/013/419/125/GCA_013419125.1_ASM1341912v1	feces	China: Shanghai	pig
Acinetobacter_sp._YH12116	Acinetobacter_indicus_CIP_110367	97.6543	Acinetobacter indicus	GCA_013418895.1	https://ftp.ncbi.nlm.nih.gov/genomes/all/GCA/013/418/895/GCA_013418895.1_ASM1341889v1	feces	China: Jiangsu	pig
Acinetobacter_baumannii_AB-A	Acinetobacter_baumannii_ATCC_19606	97.6546	Acinetobacter baumannii	GCA_002006635.1	https://ftp.ncbi.nlm.nih.gov/genomes/all/GCA/002/006/635/GCA_002006635.1_ASM200663v1	wound swab	Ethiopia	Homo sapiens
Acinetobacter_baumannii_Ab127	Acinetobacter_baumannii_DSM_30007	97.6546	Acinetobacter baumannii	GCA_005785895.1	https://ftp.ncbi.nlm.nih.gov/genomes/all/GCA/005/785/895/GCA_005785895.1_ASM578589v1	Sputamentum	China: Gungdong	Homo sapiens
Acinetobacter_baumannii_10324	Acinetobacter_baumannii_DSM_30007	97.6548	Acinetobacter baumannii	GCA_003522705.1	https://ftp.ncbi.nlm.nih.gov/genomes/all/GCA/003/522/705/GCA_003522705.1_ASM352270v1	Bronchial fluid	Mexico: Acapulco, Guerrero	Homo sapiens
Acinetobacter_baumannii_S36	Acinetobacter_baumannii_DSM_30007	97.6552	Acinetobacter baumannii	GCA_000969385.1	https://ftp.ncbi.nlm.nih.gov/genomes/all/GCA/000/969/385/GCA_000969385.1_ASM96938v1	blank	Singapore	blank
Acinetobacter_baumannii_TYTH-7	Acinetobacter_baumannii_CIP_70.34	97.6554	Acinetobacter baumannii	GCA_000770805.1	https://ftp.ncbi.nlm.nih.gov/genomes/all/GCA/000/770/805/GCA_000770805.1_ASM77080v1	sputum	Taiwan	Homo sapiens
Acinetobacter_baumannii_466760	Acinetobacter_baumannii_ATCC_19606	97.6555	Acinetobacter baumannii	GCA_000580995.1	https://ftp.ncbi.nlm.nih.gov/genomes/all/GCA/000/580/995/GCA_000580995.1_ASM58099v1	perirectal	USA	Homo sapiens
Acinetobacter_baumannii_KUSSH09	Acinetobacter_baumannii_DSM_30007	97.6556	Acinetobacter baumannii	GCA_002992625.1	https://ftp.ncbi.nlm.nih.gov/genomes/all/GCA/002/992/625/GCA_002992625.1_ASM299262v1	Tracheal Secretion	Kuwait	Homo sapiens
Acinetobacter_nosocomialis_UBA6008	Acinetobacter_nosocomialis_NIPH_2119	97.6564	Acinetobacter nosocomialis	GCA_002429525.1	https://ftp.ncbi.nlm.nih.gov/genomes/all/GCA/002/429/525/GCA_002429525.1_ASM242952v1	metal/plastic	USA:New York City	blank
Acinetobacter_baumannii_ATCC_17945	Acinetobacter_baumannii_DSM_30007	97.6565	Acinetobacter baumannii	GCA_001997285.1	https://ftp.ncbi.nlm.nih.gov/genomes/all/GCA/001/997/285/GCA_001997285.1_ASM199728v1	blank	blank	blank
Acinetobacter_baumannii_MRSN31523	Acinetobacter_baumannii_DSM_30007	97.6566	Acinetobacter baumannii	GCA_006492335.1	https://ftp.ncbi.nlm.nih.gov/genomes/all/GCA/006/492/335/GCA_006492335.1_ASM649233v1	groin	Germany	Homo sapiens
Acinetobacter_baumannii_ABBL021	Acinetobacter_baumannii_ATCC_19606	97.6568	Acinetobacter baumannii	GCA_001432595.1	https://ftp.ncbi.nlm.nih.gov/genomes/all/GCA/001/432/595/GCA_001432595.1_ASM143259v1	Blood	USA: Chicago	Homo sapiens
Acinetobacter_pittii_PR369	Acinetobacter_pittii_DSM_25618	97.6569	Acinetobacter pittii	GCA_002137115.1	https://ftp.ncbi.nlm.nih.gov/genomes/all/GCA/002/137/115/GCA_002137115.1_ASM213711v1	blank	blank	blank
Acinetobacter_nosocomialis_AB11	Acinetobacter_nosocomialis_NIPH_2119	97.6575	Acinetobacter nosocomialis	GCA_003007175.1	https://ftp.ncbi.nlm.nih.gov/genomes/all/GCA/003/007/175/GCA_003007175.1_ASM300717v1	blood	China: Guangzhou	Homo sapiens
Acinetobacter_baumannii_170714	Acinetobacter_baumannii_DSM_30007	97.6578	Acinetobacter baumannii	GCA_014560195.1	https://ftp.ncbi.nlm.nih.gov/genomes/all/GCA/014/560/195/GCA_014560195.1_ASM1456019v1	urine	China	Homo sapiens
Acinetobacter_baumannii_CAM180-1	Acinetobacter_baumannii_CIP_70.34	97.6579	Acinetobacter baumannii	GCA_008802935.1	https://ftp.ncbi.nlm.nih.gov/genomes/all/GCA/008/802/935/GCA_008802935.1_ASM880293v1	oral cavity	Cambodia: Battambang	Homo sapiens
Acinetobacter_baumannii_CCBH26881	Acinetobacter_baumannii_DSM_30007	97.658	Acinetobacter baumannii	GCA_016056005.1	https://ftp.ncbi.nlm.nih.gov/genomes/all/GCA/016/056/005/GCA_016056005.1_ASM1605600v1	blood	Brazil	Homo sapiens
Acinetobacter_baumannii_5457	Acinetobacter_baumannii_DSM_30007	97.6584	Acinetobacter baumannii	GCA_009428985.1	https://ftp.ncbi.nlm.nih.gov/genomes/all/GCA/009/428/985/GCA_009428985.1_ASM942898v1	blank	India	Homo sapiens
Acinetobacter_baumannii_A1296	Acinetobacter_baumannii_DSM_30007	97.6588	Acinetobacter baumannii	GCA_002504145.1	https://ftp.ncbi.nlm.nih.gov/genomes/all/GCA/002/504/145/GCA_002504145.1_ASM250414v1	sputum	China:Hainan	Homo sapiens
Acinetobacter_baumannii_ABUH557	Acinetobacter_baumannii_DSM_30007	97.6588	Acinetobacter baumannii	GCA_002182465.1	https://ftp.ncbi.nlm.nih.gov/genomes/all/GCA/002/182/465/GCA_002182465.1_ASM218246v1	tracheal aspirate	USA	Homo sapiens
Acinetobacter_baumannii_NFAb1	Acinetobacter_baumannii_ATCC_19606	97.659	Acinetobacter baumannii	GCA_009910195.1	https://ftp.ncbi.nlm.nih.gov/genomes/all/GCA/009/910/195/GCA_009910195.1_ASM991019v1	blood	USA: University of Chicago	Homo sapiens
Acinetobacter_baumannii_ABUH516	Acinetobacter_baumannii_ATCC_19606	97.6591	Acinetobacter baumannii	GCA_002017315.1	https://ftp.ncbi.nlm.nih.gov/genomes/all/GCA/002/017/315/GCA_002017315.1_ASM201731v1	sputum	USA: Ohio	Homo sapiens
Acinetobacter_baumannii_Survcare112	Acinetobacter_baumannii_DSM_30007	97.6595	Acinetobacter baumannii	GCA_018442635.1	https://ftp.ncbi.nlm.nih.gov/genomes/all/GCA/018/442/635/GCA_018442635.1_ASM1844263v1	Rectal swab/stool	Germany	Homo sapiens
Acinetobacter_baumannii_93_16	Acinetobacter_baumannii_DSM_30007	97.6596	Acinetobacter baumannii	GCA_015538105.1	https://ftp.ncbi.nlm.nih.gov/genomes/all/GCA/015/538/105/GCA_015538105.1_ASM1553810v1	Surveillance swab	Brazil: Piracicaba	Homo sapiens
Acinetobacter_baumannii_2011ZJAB4	Acinetobacter_baumannii_ATCC_19606	97.6599	Acinetobacter baumannii	GCA_000805215.1	https://ftp.ncbi.nlm.nih.gov/genomes/all/GCA/000/805/215/GCA_000805215.1_ASM80521v1	blood	China: Zhejiang	Homo sapiens
Acinetobacter_baumannii_DT01139C	Acinetobacter_baumannii_DSM_30007	97.6605	Acinetobacter baumannii	GCA_013416275.1	https://ftp.ncbi.nlm.nih.gov/genomes/all/GCA/013/416/275/GCA_013416275.1_ASM1341627v1	blank	Tanzania: Dar es Salaam	Homo sapiens
Acinetobacter_baumannii_4300STDY7045850	Acinetobacter_baumannii_DSM_30007	97.6608	Acinetobacter baumannii	GCA_900496155.1	https://ftp.ncbi.nlm.nih.gov/genomes/all/GCA/900/496/155/GCA_900496155.1_24276_3_9	blank	blank	blank
Acinetobacter_pittii_IHIT29469	Acinetobacter_pittii_DSM_25618	97.661	Acinetobacter pittii	GCA_002740745.1	https://ftp.ncbi.nlm.nih.gov/genomes/all/GCA/002/740/745/GCA_002740745.1_ASM274074v1	blank	Germany	cat
Acinetobacter_baumannii_AB-B	Acinetobacter_baumannii_DSM_30007	97.6611	Acinetobacter baumannii	GCA_002006665.1	https://ftp.ncbi.nlm.nih.gov/genomes/all/GCA/002/006/665/GCA_002006665.1_ASM200666v1	wound swab	Ethiopia	Homo sapiens
Acinetobacter_baumannii_ABAY13016	Acinetobacter_baumannii_DSM_30007	97.6611	Acinetobacter baumannii	GCA_009736355.1	https://ftp.ncbi.nlm.nih.gov/genomes/all/GCA/009/736/355/GCA_009736355.1_ASM973635v1	blood sample from a 63 year old man who was hospitalized in ICU	South Korea: Seoul	Homo sapiens
Acinetobacter_baumannii_VB16141	Acinetobacter_baumannii_ATCC_19606	97.6614	Acinetobacter baumannii	GCA_005280435.1	https://ftp.ncbi.nlm.nih.gov/genomes/all/GCA/005/280/435/GCA_005280435.1_ASM528043v1	blood	India	Homo sapiens
Acinetobacter_baumannii_AB3927	Acinetobacter_baumannii_DSM_30007	97.6614	Acinetobacter baumannii	GCA_001612115.1	https://ftp.ncbi.nlm.nih.gov/genomes/all/GCA/001/612/115/GCA_001612115.1_ASM161211v1	Severe Trauma Site	USA: Walter Reed Army Medical Center	Homo sapiens
Acinetobacter_baumannii_SGH0606	Acinetobacter_baumannii_DSM_30007	97.6617	Acinetobacter baumannii	GCA_003020215.1	https://ftp.ncbi.nlm.nih.gov/genomes/all/GCA/003/020/215/GCA_003020215.1_ASM302021v1	Endotracheal aspiration	Singapore: Singapore General Hospital	Homo sapiens
Acinetobacter_baumannii_MRSN7124	Acinetobacter_baumannii_CIP_70.34	97.662	Acinetobacter baumannii	GCA_006492375.1	https://ftp.ncbi.nlm.nih.gov/genomes/all/GCA/006/492/375/GCA_006492375.1_ASM649237v1	wound	USA	Homo sapiens
Acinetobacter_baumannii_NCSR_106	Acinetobacter_baumannii_DSM_30007	97.6626	Acinetobacter baumannii	GCA_900478055.2	https://ftp.ncbi.nlm.nih.gov/genomes/all/GCA/900/478/055/GCA_900478055.2_8290_3_92	blank	blank	blank
Acinetobacter_ursingii_TUM15496	Acinetobacter_ursingii_DSM_16037	97.6626	Acinetobacter ursingii	GCA_009012175.1	https://ftp.ncbi.nlm.nih.gov/genomes/all/GCA/009/012/175/GCA_009012175.1_ASM901217v1	human blood	Japan:Tochigi	Homo sapiens
Acinetobacter_baumannii_480175	Acinetobacter_baumannii_DSM_30007	97.6627	Acinetobacter baumannii	GCA_000584275.1	https://ftp.ncbi.nlm.nih.gov/genomes/all/GCA/000/584/275/GCA_000584275.1_ASM58427v1	sputum	USA	Homo sapiens
Acinetobacter_baumannii_KSK10	Acinetobacter_baumannii_DSM_30007	97.663	Acinetobacter baumannii	GCA_017724155.1	https://ftp.ncbi.nlm.nih.gov/genomes/all/GCA/017/724/155/GCA_017724155.1_ASM1772415v1	Respiratory specimen	India: New Delhi	Homo sapiens
Acinetobacter_baumannii_MRSN351524	Acinetobacter_baumannii_CIP_70.34	97.6635	Acinetobacter baumannii	GCA_006492685.1	https://ftp.ncbi.nlm.nih.gov/genomes/all/GCA/006/492/685/GCA_006492685.1_ASM649268v1	blood	Germany	Homo sapiens
Acinetobacter_baumannii_XH858	Acinetobacter_baumannii_DSM_30007	97.664	Acinetobacter baumannii	GCA_001578145.1	https://ftp.ncbi.nlm.nih.gov/genomes/all/GCA/001/578/145/GCA_001578145.1_ASM157814v1	sputum	China:Zhejiang	Homo sapiens
Acinetobacter_baumannii_Pulsotype_27	Acinetobacter_baumannii_ATCC_19606	97.6641	Acinetobacter baumannii	GCA_000750855.1	https://ftp.ncbi.nlm.nih.gov/genomes/all/GCA/000/750/855/GCA_000750855.1_600_CLC	blank	United Kingdom	blank
Acinetobacter_baumannii_917_16	Acinetobacter_baumannii_DSM_30007	97.6642	Acinetobacter baumannii	GCA_015537995.1	https://ftp.ncbi.nlm.nih.gov/genomes/all/GCA/015/537/995/GCA_015537995.1_ASM1553799v1	abdominal fluid	Brazil: Vitoria	Homo sapiens
Acinetobacter_pittii_AMA2	Acinetobacter_pittii_DSM_25618	97.6648	Acinetobacter pittii	GCA_009645895.1	https://ftp.ncbi.nlm.nih.gov/genomes/all/GCA/009/645/895/GCA_009645895.1_ASM964589v1	blank	blank	Homo sapiens
Acinetobacter_baumannii_ABBL041	Acinetobacter_baumannii_DSM_30007	97.6648	Acinetobacter baumannii	GCA_001433265.1	https://ftp.ncbi.nlm.nih.gov/genomes/all/GCA/001/433/265/GCA_001433265.1_ASM143326v1	Blood	USA: Chicago	Homo sapiens
Acinetobacter_nosocomialis_KAN02	Acinetobacter_nosocomialis_LMG_10619	97.6651	Acinetobacter nosocomialis	GCA_004295305.1	https://ftp.ncbi.nlm.nih.gov/genomes/all/GCA/004/295/305/GCA_004295305.1_ASM429530v1	blood	South Korea:Jeonju	Homo sapiens
Acinetobacter_baumannii_aba_42acb	Acinetobacter_baumannii_DSM_30007	97.6653	Acinetobacter baumannii	GCA_901484965.1	https://ftp.ncbi.nlm.nih.gov/genomes/all/GCA/901/484/965/GCA_901484965.1_aba_42acb_assembly	blank	blank	blank
Acinetobacter_baumannii_1237893	Acinetobacter_baumannii_ATCC_19606	97.6657	Acinetobacter baumannii	GCA_000584535.1	https://ftp.ncbi.nlm.nih.gov/genomes/all/GCA/000/584/535/GCA_000584535.1_ASM58453v1	sputum	USA	Homo sapiens
Acinetobacter_lactucae_TG41018	Acinetobacter_lactucae_NRRL_B-41902	97.6659	Acinetobacter lactucae	GCA_003948005.1	https://ftp.ncbi.nlm.nih.gov/genomes/all/GCA/003/948/005/GCA_003948005.1_ASM394800v1	wound	USA: Arizona	Homo sapiens
Acinetobacter_nosocomialis_TUM15386	Acinetobacter_nosocomialis_LMG_10619	97.6662	Acinetobacter nosocomialis	GCA_009002455.1	https://ftp.ncbi.nlm.nih.gov/genomes/all/GCA/009/002/455/GCA_009002455.1_ASM900245v1	human blood	Japan:Tokyo	Homo sapiens
Acinetobacter_baumannii_CCBH27449	Acinetobacter_baumannii_DSM_30007	97.6663	Acinetobacter baumannii	GCA_016055685.1	https://ftp.ncbi.nlm.nih.gov/genomes/all/GCA/016/055/685/GCA_016055685.1_ASM1605568v1	blood	Brazil	Homo sapiens
Acinetobacter_lwoffii_18QD2AZ28W	Acinetobacter_pseudolwoffii_ANC_5044	97.6666	Acinetobacter pseudolwoffii	GCA_009829005.1	https://ftp.ncbi.nlm.nih.gov/genomes/all/GCA/009/829/005/GCA_009829005.1_ASM982900v1	feces	China: Shandong	pig
Acinetobacter_baumannii_J	Acinetobacter_baumannii_DSM_30007	97.667	Acinetobacter baumannii	GCA_900043985.1	https://ftp.ncbi.nlm.nih.gov/genomes/all/GCA/900/043/985/GCA_900043985.1_acinetobacter_baumannii_isolate_strainJ	bedsore	blank	Homo sapiens
Acinetobacter_baumannii_ABBL039	Acinetobacter_baumannii_ATCC_19606	97.6673	Acinetobacter baumannii	GCA_001433655.1	https://ftp.ncbi.nlm.nih.gov/genomes/all/GCA/001/433/655/GCA_001433655.1_ASM143365v1	Blood	USA: Chicago	Homo sapiens
Acinetobacter_baumannii_MRSN7081	Acinetobacter_baumannii_DSM_30007	97.6674	Acinetobacter baumannii	GCA_001441645.1	https://ftp.ncbi.nlm.nih.gov/genomes/all/GCA/001/441/645/GCA_001441645.1_ASM144164v1	tracheal mucosa	USA: Washington, DC	Homo sapiens
Acinetobacter_baumannii_OIFC098	Acinetobacter_baumannii_CIP_70.34	97.668	Acinetobacter baumannii	GCA_000305235.1	https://ftp.ncbi.nlm.nih.gov/genomes/all/GCA/000/305/235/GCA_000305235.1_gacin14v1.0	blank	Germany: Landstuhl Regional Medical Center, Landstuhl	Homo sapiens
Acinetobacter_baumannii_KSK1	Acinetobacter_baumannii_DSM_30007	97.6681	Acinetobacter baumannii	GCA_017639875.1	https://ftp.ncbi.nlm.nih.gov/genomes/all/GCA/017/639/875/GCA_017639875.1_ASM1763987v1	Respiratory specimen	India: New Delhi	Homo sapiens
Acinetobacter_baumannii_RUH1486	Acinetobacter_baumannii_ATCC_19606	97.6683	Acinetobacter baumannii	GCA_001007705.1	https://ftp.ncbi.nlm.nih.gov/genomes/all/GCA/001/007/705/GCA_001007705.1_ASM100770v1	umbilicus	Netherlands	Homo sapiens
Acinetobacter_baumannii_KAB27	Acinetobacter_baumannii_DSM_30007	97.6683	Acinetobacter baumannii	GCA_017168645.1	https://ftp.ncbi.nlm.nih.gov/genomes/all/GCA/017/168/645/GCA_017168645.1_ASM1716864v1	blank	Kenya: Kisumu	Homo sapiens
Acinetobacter_baumannii_AB-HZ-B04	Acinetobacter_baumannii_ATCC_19606	97.6683	Acinetobacter baumannii	GCA_006367855.1	https://ftp.ncbi.nlm.nih.gov/genomes/all/GCA/006/367/855/GCA_006367855.1_ASM636785v1	blood	China: Hangzhou	Homo sapiens
Acinetobacter_nosocomialis_P020	Acinetobacter_nosocomialis_NIPH_2119	97.6684	Acinetobacter nosocomialis	GCA_002166815.1	https://ftp.ncbi.nlm.nih.gov/genomes/all/GCA/002/166/815/GCA_002166815.1_AN_P020_1.0	blank	Taiwan	Homo sapiens
Acinetobacter_baumannii_CU032113	Acinetobacter_baumannii_ATCC_19606	97.6685	Acinetobacter baumannii	GCA_001700445.1	https://ftp.ncbi.nlm.nih.gov/genomes/all/GCA/001/700/445/GCA_001700445.1_ASM170044v1	wound	USA: Aurora, CO	Homo sapiens
Acinetobacter_lactucae_JVAP01	Acinetobacter_lactucae_NRRL_B-41902	97.6686	Acinetobacter lactucae	GCA_001595745.2	https://ftp.ncbi.nlm.nih.gov/genomes/all/GCA/001/595/745/GCA_001595745.2_ASM159574v2	urine	Turkey: Aydin	Homo sapiens
Acinetobacter_baumannii_42057_6	Acinetobacter_baumannii_DSM_30007	97.6688	Acinetobacter baumannii	GCA_000627755.1	https://ftp.ncbi.nlm.nih.gov/genomes/all/GCA/000/627/755/GCA_000627755.1_ASM62775v1	blank	USA	Homo sapiens
Acinetobacter_baumannii_1406589	Acinetobacter_baumannii_DSM_30007	97.6691	Acinetobacter baumannii	GCA_000588355.1	https://ftp.ncbi.nlm.nih.gov/genomes/all/GCA/000/588/355/GCA_000588355.1_ASM58835v1	sputum	USA	Homo sapiens
Acinetobacter_baumannii_915_16	Acinetobacter_baumannii_DSM_30007	97.6691	Acinetobacter baumannii	GCA_015538255.1	https://ftp.ncbi.nlm.nih.gov/genomes/all/GCA/015/538/255/GCA_015538255.1_ASM1553825v1	abdominal fluid	Brazil: Vitoria	Homo sapiens
Acinetobacter_baumannii_741019	Acinetobacter_baumannii_ATCC_19606	97.6698	Acinetobacter baumannii	GCA_001007775.1	https://ftp.ncbi.nlm.nih.gov/genomes/all/GCA/001/007/775/GCA_001007775.1_ASM100777v1	pleural fluid	Argentina	Homo sapiens
Acinetobacter_baumannii_CCBH27135	Acinetobacter_baumannii_ATCC_19606	97.6699	Acinetobacter baumannii	GCA_016055945.1	https://ftp.ncbi.nlm.nih.gov/genomes/all/GCA/016/055/945/GCA_016055945.1_ASM1605594v1	blood	Brazil	Homo sapiens
Acinetobacter_baumannii_A5	Acinetobacter_baumannii_DSM_30007	97.6703	Acinetobacter baumannii	GCA_015265765.1	https://ftp.ncbi.nlm.nih.gov/genomes/all/GCA/015/265/765/GCA_015265765.1_ASM1526576v1	blood	South Africa: KwaZulu-Natal	Homo sapiens
Acinetobacter_baumannii_ABUH363	Acinetobacter_baumannii_ATCC_19606	97.6705	Acinetobacter baumannii	GCA_002182945.1	https://ftp.ncbi.nlm.nih.gov/genomes/all/GCA/002/182/945/GCA_002182945.1_ASM218294v1	WOUND/ABSCESS	USA	Homo sapiens
Acinetobacter_baumannii_KAB26	Acinetobacter_baumannii_ATCC_19606	97.6706	Acinetobacter baumannii	GCA_017168655.1	https://ftp.ncbi.nlm.nih.gov/genomes/all/GCA/017/168/655/GCA_017168655.1_ASM1716865v1	blank	Kenya: Kericho	Homo sapiens
Acinetobacter_baumannii_A457	Acinetobacter_baumannii_DSM_30007	97.6712	Acinetobacter baumannii	GCA_001648035.1	https://ftp.ncbi.nlm.nih.gov/genomes/all/GCA/001/648/035/GCA_001648035.1_ASM164803v1	blank	Estonia	Homo sapiens
Acinetobacter_baumannii_4300STDY7045856	Acinetobacter_baumannii_ATCC_19606	97.6714	Acinetobacter baumannii	GCA_900496395.1	https://ftp.ncbi.nlm.nih.gov/genomes/all/GCA/900/496/395/GCA_900496395.1_24276_3_15	blank	blank	blank
Acinetobacter_pittii_IHIT24944	Acinetobacter_pittii_DSM_25618	97.6717	Acinetobacter pittii	GCA_002740775.1	https://ftp.ncbi.nlm.nih.gov/genomes/all/GCA/002/740/775/GCA_002740775.1_ASM274077v1	blank	Germany	dog
Acinetobacter_baumannii_Aci00884	Acinetobacter_baumannii_DSM_30007	97.6721	Acinetobacter baumannii	GCA_904890255.1	https://ftp.ncbi.nlm.nih.gov/genomes/all/GCA/904/890/255/GCA_904890255.1_Aci00884-181025_contigs_filtered.fa.gz	clinical material	blank	blank
Acinetobacter_baumannii_SD	Acinetobacter_baumannii_ATCC_19606	97.6721	Acinetobacter baumannii	GCA_015356075.1	https://ftp.ncbi.nlm.nih.gov/genomes/all/GCA/015/356/075/GCA_015356075.1_ASM1535607v1	clinical isolate	USA: San Diego	Homo sapiens
Acinetobacter_baumannii_2018HBAB1	Acinetobacter_baumannii_DSM_30007	97.6721	Acinetobacter baumannii	GCA_017098225.2	https://ftp.ncbi.nlm.nih.gov/genomes/all/GCA/017/098/225/GCA_017098225.2_ASM1709822v2	abdominal fluid	China: Wuhan, Hubei	Homo sapiens
Acinetobacter_baumannii_Ab72	Acinetobacter_baumannii_DSM_30007	97.6725	Acinetobacter baumannii	GCA_002277705.1	https://ftp.ncbi.nlm.nih.gov/genomes/all/GCA/002/277/705/GCA_002277705.1_ASM227770v1	sputum	China: Hangzhou	Homo sapiens
Acinetobacter_baumannii_Aci00882	Acinetobacter_baumannii_DSM_30007	97.6726	Acinetobacter baumannii	GCA_902703115.1	https://ftp.ncbi.nlm.nih.gov/genomes/all/GCA/902/703/115/GCA_902703115.1_Aci00882	clinical material	blank	blank
Acinetobacter_baumannii_4300STDY6542376	Acinetobacter_baumannii_DSM_30007	97.6728	Acinetobacter baumannii	GCA_900493585.1	https://ftp.ncbi.nlm.nih.gov/genomes/all/GCA/900/493/585/GCA_900493585.1_22036_6_89	blank	blank	blank
Acinetobacter_baumannii_4300STDY7045849	Acinetobacter_baumannii_ATCC_19606	97.6729	Acinetobacter baumannii	GCA_900496185.1	https://ftp.ncbi.nlm.nih.gov/genomes/all/GCA/900/496/185/GCA_900496185.1_24276_3_8	blank	blank	blank
Acinetobacter_baumannii_PM6677	Acinetobacter_baumannii_ATCC_19606	97.6729	Acinetobacter baumannii	GCA_010500015.1	https://ftp.ncbi.nlm.nih.gov/genomes/all/GCA/010/500/015/GCA_010500015.1_ASM1050001v1	blood	India: NewDelhi	Homo sapiens
Acinetobacter_baumannii_NCTC7364	Acinetobacter_baumannii_DSM_30007	97.6737	Acinetobacter baumannii	GCA_900093475.1	https://ftp.ncbi.nlm.nih.gov/genomes/all/GCA/900/093/475/GCA_900093475.1_36734_D01_2	not available: to be reported later	blank	blank
Acinetobacter_baumannii_Aci00879	Acinetobacter_baumannii_DSM_30007	97.6742	Acinetobacter baumannii	GCA_902702975.1	https://ftp.ncbi.nlm.nih.gov/genomes/all/GCA/902/702/975/GCA_902702975.1_Aci00879	clinical material	blank	blank
Acinetobacter_baumannii_1195185_11	Acinetobacter_baumannii_DSM_30007	97.6743	Acinetobacter baumannii	GCA_000584515.2	https://ftp.ncbi.nlm.nih.gov/genomes/all/GCA/000/584/515/GCA_000584515.2_ASM58451v2	sputum	USA	Homo sapiens
Acinetobacter_baumannii_4300STDY7045695	Acinetobacter_baumannii_DSM_30007	97.6744	Acinetobacter baumannii	GCA_900494795.1	https://ftp.ncbi.nlm.nih.gov/genomes/all/GCA/900/494/795/GCA_900494795.1_24276_2_161	blank	blank	blank
Acinetobacter_pittii_AS012606	Acinetobacter_pittii_DSM_25618	97.6746	Acinetobacter pittii	GCA_010612505.1	https://ftp.ncbi.nlm.nih.gov/genomes/all/GCA/010/612/505/GCA_010612505.1_ASM1061250v1	lung	USA	Homo sapiens
Acinetobacter_baumannii_4300STDY7045743	Acinetobacter_baumannii_DSM_30007	97.6747	Acinetobacter baumannii	GCA_900495235.1	https://ftp.ncbi.nlm.nih.gov/genomes/all/GCA/900/495/235/GCA_900495235.1_24276_2_209	blank	blank	blank
Acinetobacter_baumannii_S10	Acinetobacter_baumannii_ATCC_19606	97.6748	Acinetobacter baumannii	GCA_000969295.1	https://ftp.ncbi.nlm.nih.gov/genomes/all/GCA/000/969/295/GCA_000969295.1_ASM96929v1	blank	Singapore	blank
Acinetobacter_baumannii_A3	Acinetobacter_baumannii_DSM_30007	97.6751	Acinetobacter baumannii	GCA_015265745.1	https://ftp.ncbi.nlm.nih.gov/genomes/all/GCA/015/265/745/GCA_015265745.1_ASM1526574v1	blood	South Africa: KwaZulu-Natal	Homo sapiens
Acinetobacter_baumannii_WM98	Acinetobacter_baumannii_DSM_30007	97.6752	Acinetobacter baumannii	GCA_001512015.1	https://ftp.ncbi.nlm.nih.gov/genomes/all/GCA/001/512/015/GCA_001512015.1_7521_8_25	wound	Australia:Sydney	blank
Acinetobacter_baumannii_VB29123	Acinetobacter_baumannii_DSM_30007	97.6755	Acinetobacter baumannii	GCA_003627465.1	https://ftp.ncbi.nlm.nih.gov/genomes/all/GCA/003/627/465/GCA_003627465.1_ASM362746v1	blood	India: Vellore	Homo sapiens
Acinetobacter_baumannii_198	Acinetobacter_baumannii_ATCC_19606	97.6755	Acinetobacter baumannii	GCA_003382235.1	https://ftp.ncbi.nlm.nih.gov/genomes/all/GCA/003/382/235/GCA_003382235.1_ASM338223v1	urethral swab	Ghana: Kumasi	Homo sapiens
Acinetobacter_baumannii_A522	Acinetobacter_baumannii_ATCC_19606	97.6758	Acinetobacter baumannii	GCA_013778425.1	https://ftp.ncbi.nlm.nih.gov/genomes/all/GCA/013/778/425/GCA_013778425.1_ASM1377842v1	bile	Thailand: Roi et	Homo sapiens
Acinetobacter_baumannii_Aci00881	Acinetobacter_baumannii_DSM_30007	97.676	Acinetobacter baumannii	GCA_902703065.1	https://ftp.ncbi.nlm.nih.gov/genomes/all/GCA/902/703/065/GCA_902703065.1_Aci00881	clinical material	blank	blank
Acinetobacter_baumannii_ARLG1846	Acinetobacter_baumannii_ATCC_19606	97.6761	Acinetobacter baumannii	GCA_002142945.1	https://ftp.ncbi.nlm.nih.gov/genomes/all/GCA/002/142/945/GCA_002142945.1_ASM214294v1	blank	blank	blank
Acinetobacter_baumannii_9102	Acinetobacter_baumannii_DSM_30007	97.6762	Acinetobacter baumannii	GCA_003522845.1	https://ftp.ncbi.nlm.nih.gov/genomes/all/GCA/003/522/845/GCA_003522845.1_ASM352284v1	Bronchial fluid	Mexico: Baja California	Homo sapiens
Acinetobacter_baumannii_TG22194	Acinetobacter_baumannii_DSM_30007	97.6765	Acinetobacter baumannii	GCA_000453085.1	https://ftp.ncbi.nlm.nih.gov/genomes/all/GCA/000/453/085/GCA_000453085.1_ASM45308v1	tracheal aspirate	blank	Homo sapiens
Acinetobacter_gyllenbergii_NCCP_16015	Acinetobacter_proteolyticus_NIPH_809	97.6766	Acinetobacter proteolyticus	GCA_009884295.1	https://ftp.ncbi.nlm.nih.gov/genomes/all/GCA/009/884/295/GCA_009884295.1_ASM988429v1	blank	South Korea: Incheon	Homo sapiens
Acinetobacter_nosocomialis_AMA22	Acinetobacter_nosocomialis_LMG_10619	97.6767	Acinetobacter nosocomialis	GCA_009645875.1	https://ftp.ncbi.nlm.nih.gov/genomes/all/GCA/009/645/875/GCA_009645875.1_ASM964587v1	blank	blank	Homo sapiens
Acinetobacter_baumannii_1195185_80	Acinetobacter_baumannii_ATCC_19606	97.6767	Acinetobacter baumannii	GCA_000681635.1	https://ftp.ncbi.nlm.nih.gov/genomes/all/GCA/000/681/635/GCA_000681635.1_ASM68163v1	sputum	USA	Homo sapiens
Acinetobacter_pittii_WCHAP100020	Acinetobacter_pittii_ATCC_19004	97.6768	Acinetobacter pittii	GCA_002999215.3	https://ftp.ncbi.nlm.nih.gov/genomes/all/GCA/002/999/215/GCA_002999215.3_ASM299921v3	blank	China: Sichuan, Chengdu	Homo sapiens
Acinetobacter_baumannii_ACIN00267	Acinetobacter_baumannii_DSM_30007	97.677	Acinetobacter baumannii	GCA_016506005.1	https://ftp.ncbi.nlm.nih.gov/genomes/all/GCA/016/506/005/GCA_016506005.1_ASM1650600v1	blood	USA: Pittsburgh, Pennsylvania	Homo sapiens
Acinetobacter_pittii_ABUH403	Acinetobacter_pittii_DSM_25618	97.6771	Acinetobacter pittii	GCA_002161985.1	https://ftp.ncbi.nlm.nih.gov/genomes/all/GCA/002/161/985/GCA_002161985.1_ASM216198v1	blood	USA	Homo sapiens
Acinetobacter_baumannii_Cl300	Acinetobacter_baumannii_ATCC_19606	97.6771	Acinetobacter baumannii	GCA_020132105.1	https://ftp.ncbi.nlm.nih.gov/genomes/all/GCA/020/132/105/GCA_020132105.1_ASM2013210v1	tracheal aspirate	Lebanon	Homo sapiens
Acinetobacter_baumannii_A-71.189	Acinetobacter_baumannii_DSM_30007	97.6772	Acinetobacter baumannii	GCA_009829525.1	https://ftp.ncbi.nlm.nih.gov/genomes/all/GCA/009/829/525/GCA_009829525.1_ASM982952v1	urine	Brazil	Homo sapiens
Acinetobacter_baumannii_MRSN7725	Acinetobacter_baumannii_ATCC_19606	97.6774	Acinetobacter baumannii	GCA_006492405.1	https://ftp.ncbi.nlm.nih.gov/genomes/all/GCA/006/492/405/GCA_006492405.1_ASM649240v1	wound	USA	Homo sapiens
Acinetobacter_baumannii_M	Acinetobacter_baumannii_DSM_30007	97.6775	Acinetobacter baumannii	GCA_900067075.1	https://ftp.ncbi.nlm.nih.gov/genomes/all/GCA/900/067/075/GCA_900067075.1_acinetobacter_baumannii_isolate_strainM	tracheal secretion	blank	Homo sapiens
Acinetobacter_baumannii_A297	Acinetobacter_baumannii_DSM_30007	97.6776	Acinetobacter baumannii	GCA_001512215.1	https://ftp.ncbi.nlm.nih.gov/genomes/all/GCA/001/512/215/GCA_001512215.1_9179_4_6	Not known	Netherlands	blank
Acinetobacter_baumannii_AC40_M	Acinetobacter_baumannii_ATCC_19606	97.6776	Acinetobacter baumannii	GCA_900176685.1	https://ftp.ncbi.nlm.nih.gov/genomes/all/GCA/900/176/685/GCA_900176685.1_AC40M	Anal margin	blank	blank
Acinetobacter_baumannii_DMC-32a	Acinetobacter_baumannii_DSM_30007	97.6779	Acinetobacter baumannii	GCA_004794165.2	https://ftp.ncbi.nlm.nih.gov/genomes/all/GCA/004/794/165/GCA_004794165.2_ASM479416v2	Wound swab	Bangladesh: Dhaka Medical Collage and Hospital	Homo sapiens
Acinetobacter_baumannii_J7	Acinetobacter_baumannii_DSM_30007	97.6779	Acinetobacter baumannii	GCA_001512115.1	https://ftp.ncbi.nlm.nih.gov/genomes/all/GCA/001/512/115/GCA_001512115.1_9179_4_82	Not known	Australia:Sydney	blank
Acinetobacter_sp._723929	Acinetobacter_pittii_ATCC_19004	97.678	Acinetobacter pittii	GCA_000584215.1	https://ftp.ncbi.nlm.nih.gov/genomes/all/GCA/000/584/215/GCA_000584215.1_ASM58421v1	perirectal	USA	Homo sapiens
Acinetobacter_baumannii_ABBL049	Acinetobacter_baumannii_CIP_70.34	97.6785	Acinetobacter baumannii	GCA_001433245.1	https://ftp.ncbi.nlm.nih.gov/genomes/all/GCA/001/433/245/GCA_001433245.1_ASM143324v1	Blood	USA: Chicago	Homo sapiens
Acinetobacter_baumannii_ACI40	Acinetobacter_baumannii_DSM_30007	97.6786	Acinetobacter baumannii	GCA_013138475.1	https://ftp.ncbi.nlm.nih.gov/genomes/all/GCA/013/138/475/GCA_013138475.1_ASM1313847v1	tracheal aspirate	Brazil: Belo Horizonte	Homo sapiens
Acinetobacter_baumannii_KSK20	Acinetobacter_baumannii_ATCC_19606	97.6788	Acinetobacter baumannii	GCA_017726555.1	https://ftp.ncbi.nlm.nih.gov/genomes/all/GCA/017/726/555/GCA_017726555.1_ASM1772655v1	Respiratory specimen	India: New Delhi	Homo sapiens
Acinetobacter_baumannii_4300STDY7045759	Acinetobacter_baumannii_ATCC_19606	97.6794	Acinetobacter baumannii	GCA_900495385.1	https://ftp.ncbi.nlm.nih.gov/genomes/all/GCA/900/495/385/GCA_900495385.1_24276_2_225	blank	blank	blank
Acinetobacter_baumannii_s256	Acinetobacter_baumannii_DSM_30007	97.6795	Acinetobacter baumannii	GCA_003356025.1	https://ftp.ncbi.nlm.nih.gov/genomes/all/GCA/003/356/025/GCA_003356025.1_ASM335602v1	sputum	China	Homo sapiens
Acinetobacter_baumannii_Ab182	Acinetobacter_baumannii_ATCC_19606	97.6801	Acinetobacter baumannii	GCA_018863375.1	https://ftp.ncbi.nlm.nih.gov/genomes/all/GCA/018/863/375/GCA_018863375.1_ASM1886337v1	urine	USA: South Carolina	Homo sapiens
Acinetobacter_baumannii_SI_2017_65	Acinetobacter_baumannii_DSM_30007	97.6802	Acinetobacter baumannii	GCA_009759915.1	https://ftp.ncbi.nlm.nih.gov/genomes/all/GCA/009/759/915/GCA_009759915.1_ASM975991v1	blood	Greece	Homo sapiens
Acinetobacter_baumannii_Ab187	Acinetobacter_baumannii_DSM_30007	97.6803	Acinetobacter baumannii	GCA_005786535.1	https://ftp.ncbi.nlm.nih.gov/genomes/all/GCA/005/786/535/GCA_005786535.1_ASM578653v1	blood	China: Gungdong	Homo sapiens
Acinetobacter_baumannii_A217	Acinetobacter_baumannii_ATCC_19606	97.6803	Acinetobacter baumannii	GCA_013778445.1	https://ftp.ncbi.nlm.nih.gov/genomes/all/GCA/013/778/445/GCA_013778445.1_ASM1377844v1	sputum	Thailand: Roi et	Homo sapiens
Acinetobacter_baumannii_A70	Acinetobacter_baumannii_DSM_30007	97.6804	Acinetobacter baumannii	GCA_014530945.1	https://ftp.ncbi.nlm.nih.gov/genomes/all/GCA/014/530/945/GCA_014530945.1_ASM1453094v1	blank	Egypt: Alexandria	Homo sapiens
Acinetobacter_baumannii_AB5075-VUB-itrA_ISAba13	Acinetobacter_baumannii_DSM_30007	97.6805	Acinetobacter baumannii	GCA_016919525.1	https://ftp.ncbi.nlm.nih.gov/genomes/all/GCA/016/919/525/GCA_016919525.1_ASM1691952v1	blank	Belgium	Homo sapiens
Acinetobacter_baumannii_830_16	Acinetobacter_baumannii_ATCC_19606	97.6806	Acinetobacter baumannii	GCA_015537465.1	https://ftp.ncbi.nlm.nih.gov/genomes/all/GCA/015/537/465/GCA_015537465.1_ASM1553746v1	tracheal secretion	Brazil: Araguari	Homo sapiens
Acinetobacter_baumannii_KAB14	Acinetobacter_baumannii_DSM_30007	97.6806	Acinetobacter baumannii	GCA_017168905.1	https://ftp.ncbi.nlm.nih.gov/genomes/all/GCA/017/168/905/GCA_017168905.1_ASM1716890v1	blank	Kenya: Kisii	Homo sapiens
Acinetobacter_baumannii_MC23	Acinetobacter_baumannii_DSM_30007	97.6808	Acinetobacter baumannii	GCA_003595985.1	https://ftp.ncbi.nlm.nih.gov/genomes/all/GCA/003/595/985/GCA_003595985.1_ASM359598v1	Urine Culture	Bolivia: Cochabamba	Homo sapiens
Acinetobacter_nosocomialis_2014S01-097	Acinetobacter_nosocomialis_NIPH_2119	97.6811	Acinetobacter nosocomialis	GCA_003359395.2	https://ftp.ncbi.nlm.nih.gov/genomes/all/GCA/003/359/395/GCA_003359395.2_ASM335939v2	blank	Taiwan	Homo sapiens
Acinetobacter_baumannii_DT-1139B	Acinetobacter_baumannii_ATCC_19606	97.6811	Acinetobacter baumannii	GCA_016125715.1	https://ftp.ncbi.nlm.nih.gov/genomes/all/GCA/016/125/715/GCA_016125715.1_ASM1612571v1	patient in hospital	Tanzania: Dar es Salaam	Homo sapiens
Acinetobacter_baumannii_837_16	Acinetobacter_baumannii_ATCC_19606	97.6814	Acinetobacter baumannii	GCA_015537295.1	https://ftp.ncbi.nlm.nih.gov/genomes/all/GCA/015/537/295/GCA_015537295.1_ASM1553729v1	blood	Brazil: Sao Paulo	Homo sapiens
Acinetobacter_baumannii_A023	Acinetobacter_baumannii_CIP_70.34	97.6814	Acinetobacter baumannii	GCA_004209075.1	https://ftp.ncbi.nlm.nih.gov/genomes/all/GCA/004/209/075/GCA_004209075.1_ASM420907v1	Necrotic Tissue	Mexico	Homo sapiens
Acinetobacter_nosocomialis_4300STDY7045889	Acinetobacter_nosocomialis_LMG_10619	97.6822	Acinetobacter nosocomialis	GCA_900496685.1	https://ftp.ncbi.nlm.nih.gov/genomes/all/GCA/900/496/685/GCA_900496685.1_24276_3_46	blank	blank	blank
Acinetobacter_baumannii_AB_349	Acinetobacter_baumannii_ATCC_19606	97.6822	Acinetobacter baumannii	GCA_003939585.1	https://ftp.ncbi.nlm.nih.gov/genomes/all/GCA/003/939/585/GCA_003939585.1_ASM393958v1	bedside rail in hospital intensive care unit	Pakistan	blank
Acinetobacter_baumannii_630_16	Acinetobacter_baumannii_DSM_30007	97.6823	Acinetobacter baumannii	GCA_015537225.1	https://ftp.ncbi.nlm.nih.gov/genomes/all/GCA/015/537/225/GCA_015537225.1_ASM1553722v1	urine	Brazil: Recife	Homo sapiens
Acinetobacter_baumannii_AB_1650-8	Acinetobacter_baumannii_JCM_6841	97.6824	Acinetobacter baumannii	GCA_000301255.1	https://ftp.ncbi.nlm.nih.gov/genomes/all/GCA/000/301/255/GCA_000301255.1_ASM30125v1	bone	blank	Homo sapiens
Acinetobacter_nosocomialis_AC1530	Acinetobacter_nosocomialis_LMG_10619	97.6828	Acinetobacter nosocomialis	GCA_009588945.1	https://ftp.ncbi.nlm.nih.gov/genomes/all/GCA/009/588/945/GCA_009588945.1_ASM958894v1	blood	Malaysia	Homo sapiens
Acinetobacter_baumannii_65	Acinetobacter_baumannii_ATCC_19606	97.6829	Acinetobacter baumannii	GCA_001693115.1	https://ftp.ncbi.nlm.nih.gov/genomes/all/GCA/001/693/115/GCA_001693115.1_ASM169311v1	blank	Germany	chicken
Acinetobacter_nosocomialis_2014N23-120	Acinetobacter_nosocomialis_NIPH_2119	97.683	Acinetobacter nosocomialis	GCA_003359355.2	https://ftp.ncbi.nlm.nih.gov/genomes/all/GCA/003/359/355/GCA_003359355.2_ASM335935v2	blank	Taiwan	Homo sapiens
Acinetobacter_baumannii_MRSN31915	Acinetobacter_baumannii_CIP_70.34	97.6833	Acinetobacter baumannii	GCA_006492315.1	https://ftp.ncbi.nlm.nih.gov/genomes/all/GCA/006/492/315/GCA_006492315.1_ASM649231v1	groin	Germany	Homo sapiens
Acinetobacter_baumannii_ABUH792	Acinetobacter_baumannii_DSM_30007	97.6833	Acinetobacter baumannii	GCA_001668875.1	https://ftp.ncbi.nlm.nih.gov/genomes/all/GCA/001/668/875/GCA_001668875.1_ASM166887v1	blank	blank	Homo sapiens
Acinetobacter_baumannii_NCIMB_8209	Acinetobacter_baumannii_ATCC_19606	97.6833	Acinetobacter baumannii	GCA_004194555.1	https://ftp.ncbi.nlm.nih.gov/genomes/all/GCA/004/194/555/GCA_004194555.1_ASM419455v1	aerobic microbial decomposition of whole and defoliated guayule (retting)	USA: PA, Chesnut Hill	Parthenium argentatum Gray (guayule shrubs)
Acinetobacter_baumannii_ACI53	Acinetobacter_baumannii_DSM_30007	97.6835	Acinetobacter baumannii	GCA_013138435.1	https://ftp.ncbi.nlm.nih.gov/genomes/all/GCA/013/138/435/GCA_013138435.1_ASM1313843v1	urine	Brazil: Belo Horizonte	Homo sapiens
Acinetobacter_baumannii_XH769	Acinetobacter_baumannii_DSM_30007	97.6836	Acinetobacter baumannii	GCA_001862795.1	https://ftp.ncbi.nlm.nih.gov/genomes/all/GCA/001/862/795/GCA_001862795.1_ASM186279v1	sputum	China: Hangzhou	Homo sapiens
Acinetobacter_baumannii_14216	Acinetobacter_baumannii_DSM_30007	97.6837	Acinetobacter baumannii	GCA_000588235.1	https://ftp.ncbi.nlm.nih.gov/genomes/all/GCA/000/588/235/GCA_000588235.1_ASM58823v1	sputum	USA	Homo sapiens
Acinetobacter_baumannii_461_16	Acinetobacter_baumannii_DSM_30007	97.684	Acinetobacter baumannii	GCA_015536935.1	https://ftp.ncbi.nlm.nih.gov/genomes/all/GCA/015/536/935/GCA_015536935.1_ASM1553693v1	urine	Brazil: Sao Paulo	Homo sapiens
Acinetobacter_baumannii_L	Acinetobacter_baumannii_DSM_30007	97.6847	Acinetobacter baumannii	GCA_900029365.1	https://ftp.ncbi.nlm.nih.gov/genomes/all/GCA/900/029/365/GCA_900029365.1_acinetobacter_baumannii_isolate_strainL	tracheal secretion	blank	Homo sapiens
Acinetobacter_baumannii_17A1955	Acinetobacter_baumannii_ATCC_19606	97.6847	Acinetobacter baumannii	GCA_020254645.1	https://ftp.ncbi.nlm.nih.gov/genomes/all/GCA/020/254/645/GCA_020254645.1_ASM2025464v1	Bronchial aspirate	France: Besancon	Homo sapiens
Acinetobacter_baumannii_abaum002	Acinetobacter_baumannii_DSM_30007	97.685	Acinetobacter baumannii	GCA_900607735.1	https://ftp.ncbi.nlm.nih.gov/genomes/all/GCA/900/607/735/GCA_900607735.1_abaum002	Hospital	blank	blank
Acinetobacter_pittii_IHIT32685	Acinetobacter_pittii_ATCC_19004	97.685	Acinetobacter pittii	GCA_002740805.1	https://ftp.ncbi.nlm.nih.gov/genomes/all/GCA/002/740/805/GCA_002740805.1_ASM274080v1	blank	Germany	rabbit
Acinetobacter_baumannii_ANC_4097	Acinetobacter_baumannii_DSM_30007	97.6851	Acinetobacter baumannii	GCA_000369365.1	https://ftp.ncbi.nlm.nih.gov/genomes/all/GCA/000/369/365/GCA_000369365.1_Acin_baum_ANC_4097_V1	blank	blank	blank
Acinetobacter_baumannii_AB487	Acinetobacter_baumannii_DSM_30007	97.6851	Acinetobacter baumannii	GCA_002212635.1	https://ftp.ncbi.nlm.nih.gov/genomes/all/GCA/002/212/635/GCA_002212635.1_ASM221263v1	urine	Saudi Arabia: Makkah	Homo sapiens
Acinetobacter_baumannii_GML-KP48-AB-TR	Acinetobacter_baumannii_ATCC_19606	97.6851	Acinetobacter baumannii	GCA_003184015.1	https://ftp.ncbi.nlm.nih.gov/genomes/all/GCA/003/184/015/GCA_003184015.1_ASM318401v1	wound infection	Turkey: Kayseri	Homo sapiens
Acinetobacter_baumannii_DMS06670	Acinetobacter_baumannii_DSM_30007	97.6854	Acinetobacter baumannii	GCA_009857705.1	https://ftp.ncbi.nlm.nih.gov/genomes/all/GCA/009/857/705/GCA_009857705.1_ASM985770v1	blank	Viet Nam	Homo sapiens
Acinetobacter_baumannii_4300STDY7045702	Acinetobacter_baumannii_ATCC_19606	97.6855	Acinetobacter baumannii	GCA_900494815.1	https://ftp.ncbi.nlm.nih.gov/genomes/all/GCA/900/494/815/GCA_900494815.1_24276_2_168	blank	blank	blank
Acinetobacter_baumannii_ABS103	Acinetobacter_baumannii_DSM_30007	97.6857	Acinetobacter baumannii	GCA_009497515.1	https://ftp.ncbi.nlm.nih.gov/genomes/all/GCA/009/497/515/GCA_009497515.1_ASM949751v1	wound	Iran	Homo sapiens
Acinetobacter_baumannii_AbBAS-1	Acinetobacter_baumannii_DSM_30007	97.6858	Acinetobacter baumannii	GCA_015832155.1	https://ftp.ncbi.nlm.nih.gov/genomes/all/GCA/015/832/155/GCA_015832155.1_ASM1583215v1	clinical	Spain: Bilbao	Homo sapiens
Acinetobacter_baumannii_ACIN00170	Acinetobacter_baumannii_DSM_30007	97.6859	Acinetobacter baumannii	GCA_016506895.1	https://ftp.ncbi.nlm.nih.gov/genomes/all/GCA/016/506/895/GCA_016506895.1_ASM1650689v1	sputum	USA: Pittsburgh, Pennsylvania	Homo sapiens
Acinetobacter_baumannii_Pesh-14	Acinetobacter_baumannii_DSM_30007	97.6861	Acinetobacter baumannii	GCA_004357125.1	https://ftp.ncbi.nlm.nih.gov/genomes/all/GCA/004/357/125/GCA_004357125.1_ASM435712v1	EB	Pakistan: Peshawar	Homo sapiens
Acinetobacter_baumannii_4300STDY7045884	Acinetobacter_baumannii_ATCC_19606	97.6861	Acinetobacter baumannii	GCA_900496585.1	https://ftp.ncbi.nlm.nih.gov/genomes/all/GCA/900/496/585/GCA_900496585.1_24276_3_41	blank	blank	blank
Acinetobacter_baumannii_TG16790	Acinetobacter_baumannii_DSM_30007	97.6862	Acinetobacter baumannii	GCA_003948295.1	https://ftp.ncbi.nlm.nih.gov/genomes/all/GCA/003/948/295/GCA_003948295.1_ASM394829v1	blank	USA: Arizona	Homo sapiens
Acinetobacter_baumannii_162_17	Acinetobacter_baumannii_DSM_30007	97.6862	Acinetobacter baumannii	GCA_015536965.1	https://ftp.ncbi.nlm.nih.gov/genomes/all/GCA/015/536/965/GCA_015536965.1_ASM1553696v1	blank	Brazil: Sao Paulo	Homo sapiens
Acinetobacter_baumannii_ARLG-1860	Acinetobacter_baumannii_DSM_30007	97.6864	Acinetobacter baumannii	GCA_002184365.1	https://ftp.ncbi.nlm.nih.gov/genomes/all/GCA/002/184/365/GCA_002184365.1_ASM218436v1	blank	USA: Unknown	blank
Acinetobacter_baumannii_DSM_30011	Acinetobacter_baumannii_DSM_30007	97.6865	Acinetobacter baumannii	GCA_001936675.2	https://ftp.ncbi.nlm.nih.gov/genomes/all/GCA/001/936/675/GCA_001936675.2_ASM193667v2	blank	blank	blank
Acinetobacter_baumannii_AR_0101	Acinetobacter_baumannii_CIP_70.34	97.6868	Acinetobacter baumannii	GCA_003010675.1	https://ftp.ncbi.nlm.nih.gov/genomes/all/GCA/003/010/675/GCA_003010675.1_ASM301067v1	blank	blank	blank
Acinetobacter_baumannii_XH840	Acinetobacter_baumannii_ATCC_19606	97.687	Acinetobacter baumannii	GCA_001863315.1	https://ftp.ncbi.nlm.nih.gov/genomes/all/GCA/001/863/315/GCA_001863315.1_ASM186331v1	sputum	China: Hangzhou	Homo sapiens
Acinetobacter_baumannii_42057_4	Acinetobacter_baumannii_ATCC_19606	97.687	Acinetobacter baumannii	GCA_000671675.1	https://ftp.ncbi.nlm.nih.gov/genomes/all/GCA/000/671/675/GCA_000671675.1_ASM67167v1	blank	USA	Homo sapiens
Acinetobacter_baumannii_KSK19	Acinetobacter_baumannii_ATCC_19606	97.6872	Acinetobacter baumannii	GCA_017726495.1	https://ftp.ncbi.nlm.nih.gov/genomes/all/GCA/017/726/495/GCA_017726495.1_ASM1772649v1	Respiratory specimen	India: New Delhi	Homo sapiens
Acinetobacter_baumannii_MRSN32304	Acinetobacter_baumannii_DSM_30007	97.6872	Acinetobacter baumannii	GCA_006492945.1	https://ftp.ncbi.nlm.nih.gov/genomes/all/GCA/006/492/945/GCA_006492945.1_ASM649294v1	sterile body fluid	USA	Homo sapiens
Acinetobacter_baumannii_F	Acinetobacter_baumannii_DSM_30007	97.6876	Acinetobacter baumannii	GCA_900029355.1	https://ftp.ncbi.nlm.nih.gov/genomes/all/GCA/900/029/355/GCA_900029355.1_acinetobacter_baumannii_isolate_strainF	tracheostoma	blank	Homo sapiens
Acinetobacter_baumannii_KAB17	Acinetobacter_baumannii_DSM_30007	97.6878	Acinetobacter baumannii	GCA_017169335.1	https://ftp.ncbi.nlm.nih.gov/genomes/all/GCA/017/169/335/GCA_017169335.1_ASM1716933v1	blank	Kenya: Kisii	Homo sapiens
Acinetobacter_baumannii_20A2942	Acinetobacter_baumannii_DSM_30007	97.6878	Acinetobacter baumannii	GCA_020251365.1	https://ftp.ncbi.nlm.nih.gov/genomes/all/GCA/020/251/365/GCA_020251365.1_ASM2025136v1	blood	France: Besancon	Homo sapiens
Acinetobacter_baumannii_MRSN20755	Acinetobacter_baumannii_DSM_30007	97.6879	Acinetobacter baumannii	GCA_001441625.1	https://ftp.ncbi.nlm.nih.gov/genomes/all/GCA/001/441/625/GCA_001441625.1_ASM144162v1	tracheal mucosa	USA: Washington, DC	Homo sapiens
Acinetobacter_baumannii_ACMH-6200	Acinetobacter_baumannii_DSM_30007	97.688	Acinetobacter baumannii	GCA_001432265.1	https://ftp.ncbi.nlm.nih.gov/genomes/all/GCA/001/432/265/GCA_001432265.1_ASM143226v1	blank	Lebanon	Homo sapiens
Acinetobacter_baumannii_CCBH26689	Acinetobacter_baumannii_JCM_6841	97.6882	Acinetobacter baumannii	GCA_016056145.1	https://ftp.ncbi.nlm.nih.gov/genomes/all/GCA/016/056/145/GCA_016056145.1_ASM1605614v1	blood	Brazil	Homo sapiens
Acinetobacter_baumannii_KZ-1093	Acinetobacter_baumannii_DSM_30007	97.6885	Acinetobacter baumannii	GCA_020532025.1	https://ftp.ncbi.nlm.nih.gov/genomes/all/GCA/020/532/025/GCA_020532025.1_ASM2053202v1	respiratory tract	Kazakhstan	Homo sapiens
Acinetobacter_baumannii_NIPH_329	Acinetobacter_baumannii_CIP_70.34	97.6887	Acinetobacter baumannii	GCA_000369225.1	https://ftp.ncbi.nlm.nih.gov/genomes/all/GCA/000/369/225/GCA_000369225.1_Acin_baum_NIPH_329_V1	blank	blank	blank
Acinetobacter_baumannii_722310	Acinetobacter_baumannii_DSM_30007	97.6888	Acinetobacter baumannii	GCA_000583275.1	https://ftp.ncbi.nlm.nih.gov/genomes/all/GCA/000/583/275/GCA_000583275.1_ASM58327v1	sputum	USA	Homo sapiens
Acinetobacter_baumannii_ABS200	Acinetobacter_baumannii_DSM_30007	97.689	Acinetobacter baumannii	GCA_016767955.1	https://ftp.ncbi.nlm.nih.gov/genomes/all/GCA/016/767/955/GCA_016767955.1_ASM1676795v1	Shaldon catheter	Iran: Tehran	Homo sapiens
Acinetobacter_baumannii_Ab109	Acinetobacter_baumannii_DSM_30007	97.689	Acinetobacter baumannii	GCA_900476785.2	https://ftp.ncbi.nlm.nih.gov/genomes/all/GCA/900/476/785/GCA_900476785.2_7521_8_37	blank	blank	blank
Acinetobacter_baumannii_2375	Acinetobacter_baumannii_DSM_30007	97.6893	Acinetobacter baumannii	GCA_008709685.1	https://ftp.ncbi.nlm.nih.gov/genomes/all/GCA/008/709/685/GCA_008709685.1_AB_2375	blank	India	Homo sapiens
Acinetobacter_baumannii_CCF8	Acinetobacter_baumannii_DSM_30007	97.6901	Acinetobacter baumannii	GCA_001664765.1	https://ftp.ncbi.nlm.nih.gov/genomes/all/GCA/001/664/765/GCA_001664765.1_ASM166476v1	blank	blank	Homo sapiens
Acinetobacter_baumannii_KSK2	Acinetobacter_baumannii_DSM_30007	97.6909	Acinetobacter baumannii	GCA_017742855.1	https://ftp.ncbi.nlm.nih.gov/genomes/all/GCA/017/742/855/GCA_017742855.1_ASM1774285v1	Respiratory specimen	India: New Delhi	Homo sapiens
Acinetobacter_baumannii_AB_347	Acinetobacter_baumannii_DSM_30007	97.6909	Acinetobacter baumannii	GCA_003939595.1	https://ftp.ncbi.nlm.nih.gov/genomes/all/GCA/003/939/595/GCA_003939595.1_ASM393959v1	nursing call button in hospital intensive care unit	Pakistan	blank
Acinetobacter_baumannii_SP2448	Acinetobacter_baumannii_ATCC_19606	97.6909	Acinetobacter baumannii	GCA_011602165.1	https://ftp.ncbi.nlm.nih.gov/genomes/all/GCA/011/602/165/GCA_011602165.1_ASM1160216v1	Endotracheal Aspirate	India: Vellore	Homo sapiens
Acinetobacter_baumannii_E	Acinetobacter_baumannii_DSM_30007	97.6912	Acinetobacter baumannii	GCA_900019975.1	https://ftp.ncbi.nlm.nih.gov/genomes/all/GCA/900/019/975/GCA_900019975.1_acinetobacter_baumannii_isolate_strainE	tracheal secretion	blank	Homo sapiens
Acinetobacter_baumannii_KSK6	Acinetobacter_baumannii_ATCC_19606	97.6914	Acinetobacter baumannii	GCA_017723975.1	https://ftp.ncbi.nlm.nih.gov/genomes/all/GCA/017/723/975/GCA_017723975.1_ASM1772397v1	Respiratory specimen	India: New Delhi	Homo sapiens
Acinetobacter_baumannii_AB_1649-8	Acinetobacter_baumannii_DSM_30007	97.6914	Acinetobacter baumannii	GCA_000301235.1	https://ftp.ncbi.nlm.nih.gov/genomes/all/GCA/000/301/235/GCA_000301235.1_ASM30123v1	sputum	blank	Homo sapiens
Acinetobacter_baumannii_151	Acinetobacter_baumannii_DSM_30007	97.6916	Acinetobacter baumannii	GCA_002411775.1	https://ftp.ncbi.nlm.nih.gov/genomes/all/GCA/002/411/775/GCA_002411775.1_ASM241177v1	urine	Ghana: Kumasi	Homo sapiens
Acinetobacter_baumannii_472237-120	Acinetobacter_baumannii_ATCC_19606	97.6916	Acinetobacter baumannii	GCA_000583415.1	https://ftp.ncbi.nlm.nih.gov/genomes/all/GCA/000/583/415/GCA_000583415.1_ASM58341v1	sputum	USA	Homo sapiens
Acinetobacter_baumannii_BA22685	Acinetobacter_baumannii_DSM_30007	97.6917	Acinetobacter baumannii	GCA_011601365.1	https://ftp.ncbi.nlm.nih.gov/genomes/all/GCA/011/601/365/GCA_011601365.1_ASM1160136v1	blood	India: Vellore	Homo sapiens
Acinetobacter_baumannii_NIPH_60	Acinetobacter_baumannii_DSM_30007	97.6917	Acinetobacter baumannii	GCA_000368545.1	https://ftp.ncbi.nlm.nih.gov/genomes/all/GCA/000/368/545/GCA_000368545.1_Acin_baum_NIPH_60_V1	blank	blank	blank
Acinetobacter_baumannii_KSK7	Acinetobacter_baumannii_ATCC_19606	97.6918	Acinetobacter baumannii	GCA_017724115.1	https://ftp.ncbi.nlm.nih.gov/genomes/all/GCA/017/724/115/GCA_017724115.1_ASM1772411v1	Respiratory specimen	India: New Delhi	Homo sapiens
Acinetobacter_baumannii_KSK18	Acinetobacter_baumannii_ATCC_19606	97.6918	Acinetobacter baumannii	GCA_017724215.1	https://ftp.ncbi.nlm.nih.gov/genomes/all/GCA/017/724/215/GCA_017724215.1_ASM1772421v1	Respiratory specimen	India: New Delhi	Homo sapiens
Acinetobacter_baumannii_J10	Acinetobacter_baumannii_DSM_30007	97.692	Acinetobacter baumannii	GCA_001511855.1	https://ftp.ncbi.nlm.nih.gov/genomes/all/GCA/001/511/855/GCA_001511855.1_9179_4_85	Not known	Australia:Sydney	blank
Acinetobacter_baumannii_NIPH_80	Acinetobacter_baumannii_DSM_30007	97.692	Acinetobacter baumannii	GCA_000369345.1	https://ftp.ncbi.nlm.nih.gov/genomes/all/GCA/000/369/345/GCA_000369345.1_Acin_baum_NIPH_80_V1	blank	blank	blank
Acinetobacter_baumannii_521_17	Acinetobacter_baumannii_DSM_30007	97.6922	Acinetobacter baumannii	GCA_004347305.1	https://ftp.ncbi.nlm.nih.gov/genomes/all/GCA/004/347/305/GCA_004347305.1_ASM434730v1	blood	Brazil: Sao Paulo, Sao Paulo	Homo sapiens
Acinetobacter_baumannii_14A750	Acinetobacter_baumannii_DSM_30007	97.6924	Acinetobacter baumannii	GCA_020255225.1	https://ftp.ncbi.nlm.nih.gov/genomes/all/GCA/020/255/225/GCA_020255225.1_ASM2025522v1	blood	France: Besancon	Homo sapiens
Acinetobacter_nosocomialis_AC1648	Acinetobacter_nosocomialis_LMG_10619	97.6927	Acinetobacter nosocomialis	GCA_018139425.1	https://ftp.ncbi.nlm.nih.gov/genomes/all/GCA/018/139/425/GCA_018139425.1_ASM1813942v1	blood	Malaysia	Homo sapiens
Acinetobacter_nosocomialis_GTC_03312	Acinetobacter_nosocomialis_LMG_10619	97.6931	Acinetobacter nosocomialis	GCA_000775895.1	https://ftp.ncbi.nlm.nih.gov/genomes/all/GCA/000/775/895/GCA_000775895.1_ASM77589v1	blank	blank	blank
Acinetobacter_baumannii_MRSN14193	Acinetobacter_baumannii_DSM_30007	97.6934	Acinetobacter baumannii	GCA_006494215.1	https://ftp.ncbi.nlm.nih.gov/genomes/all/GCA/006/494/215/GCA_006494215.1_ASM649421v1	wound	Honduras	Homo sapiens
Acinetobacter_baumannii_ARLG1787	Acinetobacter_baumannii_DSM_30007	97.6935	Acinetobacter baumannii	GCA_002143375.1	https://ftp.ncbi.nlm.nih.gov/genomes/all/GCA/002/143/375/GCA_002143375.1_ASM214337v1	blank	blank	blank
Acinetobacter_baumannii_A85	Acinetobacter_baumannii_DSM_30007	97.6935	Acinetobacter baumannii	GCA_002210065.1	https://ftp.ncbi.nlm.nih.gov/genomes/all/GCA/002/210/065/GCA_002210065.1_ASM221006v1	sputum	Australia:Sydney	Homo sapiens
Acinetobacter_baumannii_ABBL017	Acinetobacter_baumannii_CIP_70.34	97.6936	Acinetobacter baumannii	GCA_001432525.1	https://ftp.ncbi.nlm.nih.gov/genomes/all/GCA/001/432/525/GCA_001432525.1_ASM143252v1	Blood	USA: Chicago	Homo sapiens
Acinetobacter_baumannii_KSK11	Acinetobacter_baumannii_ATCC_19606	97.6937	Acinetobacter baumannii	GCA_017724195.1	https://ftp.ncbi.nlm.nih.gov/genomes/all/GCA/017/724/195/GCA_017724195.1_ASM1772419v1	Respiratory specimen	India: New Delhi	Homo sapiens
Acinetobacter_baumannii_ACIN00167	Acinetobacter_baumannii_DSM_30007	97.6937	Acinetobacter baumannii	GCA_016508505.1	https://ftp.ncbi.nlm.nih.gov/genomes/all/GCA/016/508/505/GCA_016508505.1_ASM1650850v1	sputum	USA: Pittsburgh, Pennsylvania	Homo sapiens
Acinetobacter_bereziniae_NIPH_3	Acinetobacter_bereziniae_LMG_1003	97.6939	Acinetobacter bereziniae	GCA_000368505.1	https://ftp.ncbi.nlm.nih.gov/genomes/all/GCA/000/368/505/GCA_000368505.1_Acin_bere_NIPH_3_V1	blank	blank	blank
Acinetobacter_baumannii_MRSN15313	Acinetobacter_baumannii_ATCC_19606	97.6939	Acinetobacter baumannii	GCA_003812485.1	https://ftp.ncbi.nlm.nih.gov/genomes/all/GCA/003/812/485/GCA_003812485.1_ASM381248v1	cerebrospinal fluid	Brazil: Salvador	Homo sapiens
Acinetobacter_baumannii_17-84	Acinetobacter_pittii_ATCC_19004	97.6942	Acinetobacter pittii	GCA_014171935.1	https://ftp.ncbi.nlm.nih.gov/genomes/all/GCA/014/171/935/GCA_014171935.1_ASM1417193v1	blank	China	Homo sapiens
Acinetobacter_baumannii_PR379	Acinetobacter_baumannii_DSM_30007	97.6944	Acinetobacter baumannii	GCA_002137335.1	https://ftp.ncbi.nlm.nih.gov/genomes/all/GCA/002/137/335/GCA_002137335.1_ASM213733v1	blank	blank	blank
Acinetobacter_pittii_CEP14	Acinetobacter_pittii_ATCC_19004	97.6944	Acinetobacter pittii	GCA_020535225.1	https://ftp.ncbi.nlm.nih.gov/genomes/all/GCA/020/535/225/GCA_020535225.1_ASM2053522v1	Groundwater from chloroethene-contaminated soil at chemical factory	Czech Republic: Usti nad Labem	blank
Acinetobacter_baumannii_2008S11-069	Acinetobacter_baumannii_DSM_30007	97.6945	Acinetobacter baumannii	GCA_003359255.2	https://ftp.ncbi.nlm.nih.gov/genomes/all/GCA/003/359/255/GCA_003359255.2_ASM335925v2	blank	Taiwan	Homo sapiens
Acinetobacter_baumannii_SIUA6	Acinetobacter_baumannii_ATCC_19606	97.6946	Acinetobacter baumannii	GCA_002239725.1	https://ftp.ncbi.nlm.nih.gov/genomes/all/GCA/002/239/725/GCA_002239725.1_ASM223972v1	urine	Thailand	Homo sapiens
Acinetobacter_baumannii_1297549	Acinetobacter_baumannii_ATCC_19606	97.6947	Acinetobacter baumannii	GCA_000580775.1	https://ftp.ncbi.nlm.nih.gov/genomes/all/GCA/000/580/775/GCA_000580775.1_ASM58077v1	perirectal	USA	Homo sapiens
Acinetobacter_baumannii_DETAB-P39	Acinetobacter_baumannii_DSM_30007	97.6948	Acinetobacter baumannii	GCA_018135585.1	https://ftp.ncbi.nlm.nih.gov/genomes/all/GCA/018/135/585/GCA_018135585.1_ASM1813558v1	patient	China:Hangzhou	Homo sapiens
Acinetobacter_baumannii_ABUH505	Acinetobacter_baumannii_JCM_6841	97.695	Acinetobacter baumannii	GCA_002183505.1	https://ftp.ncbi.nlm.nih.gov/genomes/all/GCA/002/183/505/GCA_002183505.1_ASM218350v1	WOUND/ABSCESS	USA	Homo sapiens
Acinetobacter_baumannii_541_17	Acinetobacter_baumannii_DSM_30007	97.6951	Acinetobacter baumannii	GCA_015537175.1	https://ftp.ncbi.nlm.nih.gov/genomes/all/GCA/015/537/175/GCA_015537175.1_ASM1553717v1	blood	Brazil: Sao Paulo	Homo sapiens
Acinetobacter_baumannii_A-71.193	Acinetobacter_baumannii_DSM_30007	97.6951	Acinetobacter baumannii	GCA_009829545.1	https://ftp.ncbi.nlm.nih.gov/genomes/all/GCA/009/829/545/GCA_009829545.1_ASM982954v1	blood	Brazil	Homo sapiens
Acinetobacter_baumannii_A465	Acinetobacter_baumannii_DSM_30007	97.6952	Acinetobacter baumannii	GCA_004209035.1	https://ftp.ncbi.nlm.nih.gov/genomes/all/GCA/004/209/035/GCA_004209035.1_ASM420903v1	blank	Mexico	Homo sapiens
Acinetobacter_baumannii_7893	Acinetobacter_baumannii_DSM_30007	97.6953	Acinetobacter baumannii	GCA_000583455.1	https://ftp.ncbi.nlm.nih.gov/genomes/all/GCA/000/583/455/GCA_000583455.1_ASM58345v1	sputum	USA	Homo sapiens
Acinetobacter_baumannii_SP2486	Acinetobacter_baumannii_DSM_30007	97.6953	Acinetobacter baumannii	GCA_010500435.1	https://ftp.ncbi.nlm.nih.gov/genomes/all/GCA/010/500/435/GCA_010500435.1_ASM1050043v1	Endotracheal Aspirate	India: Vellore	Homo sapiens
Acinetobacter_baumannii_AC19	Acinetobacter_baumannii_DSM_30007	97.6954	Acinetobacter baumannii	GCA_008806495.1	https://ftp.ncbi.nlm.nih.gov/genomes/all/GCA/008/806/495/GCA_008806495.1_ASM880649v1	ETT secretion	Malaysia	Homo sapiens
Acinetobacter_baumannii_DA33382	Acinetobacter_baumannii_DSM_30007	97.6954	Acinetobacter baumannii	GCA_003296225.1	https://ftp.ncbi.nlm.nih.gov/genomes/all/GCA/003/296/225/GCA_003296225.1_ASM329622v1	Tracheal secretion	Germany	Homo sapiens
Acinetobacter_baumannii_19A2692	Acinetobacter_baumannii_ATCC_19606	97.6955	Acinetobacter baumannii	GCA_019352355.1	https://ftp.ncbi.nlm.nih.gov/genomes/all/GCA/019/352/355/GCA_019352355.1_ASM1935235v1	Lung/Blood	Reunion	Homo sapiens
Acinetobacter_baumannii_A8-T	Acinetobacter_baumannii_DSM_30007	97.6958	Acinetobacter baumannii	GCA_014531705.1	https://ftp.ncbi.nlm.nih.gov/genomes/all/GCA/014/531/705/GCA_014531705.1_ASM1453170v1	blank	Egypt: Alexandria	Homo sapiens
Acinetobacter_baumannii_808_16	Acinetobacter_baumannii_ATCC_19606	97.696	Acinetobacter baumannii	GCA_015537615.1	https://ftp.ncbi.nlm.nih.gov/genomes/all/GCA/015/537/615/GCA_015537615.1_ASM1553761v1	blood	Brazil: Sao Paulo	Homo sapiens
Acinetobacter_baumannii_TG22332	Acinetobacter_baumannii_DSM_30007	97.6962	Acinetobacter baumannii	GCA_000453225.1	https://ftp.ncbi.nlm.nih.gov/genomes/all/GCA/000/453/225/GCA_000453225.1_ASM45322v1	tracheal aspirate	blank	Homo sapiens
Acinetobacter_baumannii_Survcare255	Acinetobacter_baumannii_DSM_30007	97.6963	Acinetobacter baumannii	GCA_018446675.1	https://ftp.ncbi.nlm.nih.gov/genomes/all/GCA/018/446/675/GCA_018446675.1_ASM1844667v1	Bronchial secretions/BAL	Germany	Homo sapiens
Acinetobacter_baumannii_NCTC7412	Acinetobacter_baumannii_DSM_30007	97.6963	Acinetobacter baumannii	GCA_900444815.1	https://ftp.ncbi.nlm.nih.gov/genomes/all/GCA/900/444/815/GCA_900444815.1_58529_B01	blank	blank	blank
Acinetobacter_baumannii_ACI42	Acinetobacter_baumannii_DSM_30007	97.6963	Acinetobacter baumannii	GCA_013138415.1	https://ftp.ncbi.nlm.nih.gov/genomes/all/GCA/013/138/415/GCA_013138415.1_ASM1313841v1	tracheal aspirate	Brazil: Belo Horizonte	Homo sapiens
Acinetobacter_baumannii_20A2875	Acinetobacter_baumannii_DSM_30007	97.6964	Acinetobacter baumannii	GCA_020251245.1	https://ftp.ncbi.nlm.nih.gov/genomes/all/GCA/020/251/245/GCA_020251245.1_ASM2025124v1	Rectal swab	France: Besancon	Homo sapiens
Acinetobacter_baumannii_AR_0037	Acinetobacter_baumannii_DSM_30007	97.6965	Acinetobacter baumannii	GCA_001874765.1	https://ftp.ncbi.nlm.nih.gov/genomes/all/GCA/001/874/765/GCA_001874765.1_ASM187476v1	blank	blank	blank
Acinetobacter_baumannii_UH11608	Acinetobacter_baumannii_ATCC_19606	97.6966	Acinetobacter baumannii	GCA_000515555.1	https://ftp.ncbi.nlm.nih.gov/genomes/all/GCA/000/515/555/GCA_000515555.1_gabuh11608_v01	urine	USA	Homo sapiens
Acinetobacter_baumannii_464_16	Acinetobacter_baumannii_DSM_30007	97.6966	Acinetobacter baumannii	GCA_015538325.1	https://ftp.ncbi.nlm.nih.gov/genomes/all/GCA/015/538/325/GCA_015538325.1_ASM1553832v1	cerebrospinal fluid	Brazil: Sao Paulo	Homo sapiens
Acinetobacter_baumannii_IITR88	Acinetobacter_baumannii_DSM_30007	97.6968	Acinetobacter baumannii	GCA_001516805.1	https://ftp.ncbi.nlm.nih.gov/genomes/all/GCA/001/516/805/GCA_001516805.1_ASM151680v1	River Bhagirathi	India	blank
Acinetobacter_baumannii_Aba_18S	Acinetobacter_baumannii_DSM_30007	97.6968	Acinetobacter baumannii	GCA_013185135.1	https://ftp.ncbi.nlm.nih.gov/genomes/all/GCA/013/185/135/GCA_013185135.1_ASM1318513v1	tracheal secretion	Romania: Children Hospital from Bucharest	Homo sapiens
Acinetobacter_baumannii_1295743	Acinetobacter_baumannii_ATCC_19606	97.6969	Acinetobacter baumannii	GCA_000580875.1	https://ftp.ncbi.nlm.nih.gov/genomes/all/GCA/000/580/875/GCA_000580875.1_ASM58087v1	perirectal	USA	Homo sapiens
Acinetobacter_baumannii_AB4448	Acinetobacter_baumannii_DSM_30007	97.697	Acinetobacter baumannii	GCA_001612255.1	https://ftp.ncbi.nlm.nih.gov/genomes/all/GCA/001/612/255/GCA_001612255.1_ASM161225v1	warwound (surv)	USA: Walter Reed Army Medical Center	Homo sapiens
Acinetobacter_baumannii_Ab203	Acinetobacter_baumannii_DSM_30007	97.697	Acinetobacter baumannii	GCA_900477525.2	https://ftp.ncbi.nlm.nih.gov/genomes/all/GCA/900/477/525/GCA_900477525.2_9179_4_83	blank	blank	blank
Acinetobacter_baumannii_M476	Acinetobacter_baumannii_DSM_30007	97.6974	Acinetobacter baumannii	GCA_018361305.1	https://ftp.ncbi.nlm.nih.gov/genomes/all/GCA/018/361/305/GCA_018361305.1_ASM1836130v1	waste water effluent	South Africa: KwaZulu-Natal	Homo sapiens
Acinetobacter_baumannii_ABBL053	Acinetobacter_baumannii_DSM_30007	97.6974	Acinetobacter baumannii	GCA_001433695.1	https://ftp.ncbi.nlm.nih.gov/genomes/all/GCA/001/433/695/GCA_001433695.1_ASM143369v1	Blood	USA: Chicago	Homo sapiens
Acinetobacter_baumannii_D13	Acinetobacter_baumannii_DSM_30007	97.6976	Acinetobacter baumannii	GCA_001512155.1	https://ftp.ncbi.nlm.nih.gov/genomes/all/GCA/001/512/155/GCA_001512155.1_7521_8_36	urine	Australia:Sydney	blank
Acinetobacter_nosocomialis_UBA5786	Acinetobacter_nosocomialis_NIPH_2119	97.698	Acinetobacter nosocomialis	GCA_002418425.1	https://ftp.ncbi.nlm.nih.gov/genomes/all/GCA/002/418/425/GCA_002418425.1_ASM241842v1	metal	USA:New York City	blank
Acinetobacter_baumannii_TUM16642	Acinetobacter_baumannii_ATCC_19606	97.6981	Acinetobacter baumannii	GCA_008581485.1	https://ftp.ncbi.nlm.nih.gov/genomes/all/GCA/008/581/485/GCA_008581485.1_ASM858148v1	human blood	Japan	Homo sapiens
Acinetobacter_baumannii_s216	Acinetobacter_baumannii_ATCC_19606	97.6984	Acinetobacter baumannii	GCA_003356815.1	https://ftp.ncbi.nlm.nih.gov/genomes/all/GCA/003/356/815/GCA_003356815.1_ASM335681v1	sputum	China	Homo sapiens
Acinetobacter_baumannii_AbCTX19	Acinetobacter_baumannii_DSM_30007	97.6985	Acinetobacter baumannii	GCA_016762855.1	https://ftp.ncbi.nlm.nih.gov/genomes/all/GCA/016/762/855/GCA_016762855.1_ASM1676285v1	Rectal swab	France: Le Kremlin Bicetre	Homo sapiens
Acinetobacter_baumannii_AB186-VUB	Acinetobacter_baumannii_ATCC_19606	97.6985	Acinetobacter baumannii	GCA_018789495.1	https://ftp.ncbi.nlm.nih.gov/genomes/all/GCA/018/789/495/GCA_018789495.1_ASM1878949v1	blank	Belgium	Homo sapiens
Acinetobacter_baumannii_15953	Acinetobacter_baumannii_ATCC_19606	97.699	Acinetobacter baumannii	GCA_017292175.1	https://ftp.ncbi.nlm.nih.gov/genomes/all/GCA/017/292/175/GCA_017292175.1_ASM1729217v1	urine	Nigeria	Homo sapiens
Acinetobacter_baumannii_VNMU133	Acinetobacter_baumannii_ATCC_19606	97.6991	Acinetobacter baumannii	GCA_009887905.1	https://ftp.ncbi.nlm.nih.gov/genomes/all/GCA/009/887/905/GCA_009887905.1_ASM988790v1	wound	Ukraine	Homo sapiens
Acinetobacter_baumannii_1494580	Acinetobacter_baumannii_ATCC_19606	97.6992	Acinetobacter baumannii	GCA_000587895.1	https://ftp.ncbi.nlm.nih.gov/genomes/all/GCA/000/587/895/GCA_000587895.1_ASM58789v1	sputum	USA	Homo sapiens
Acinetobacter_baumannii_ABOB01	Acinetobacter_baumannii_DSM_30007	97.6993	Acinetobacter baumannii	GCA_001416355.1	https://ftp.ncbi.nlm.nih.gov/genomes/all/GCA/001/416/355/GCA_001416355.1_ASM141635v1	blank	USA: Chicago	Homo sapiens
Acinetobacter_baumannii_AB77	Acinetobacter_baumannii_DSM_30007	97.6993	Acinetobacter baumannii	GCA_900117945.2	https://ftp.ncbi.nlm.nih.gov/genomes/all/GCA/900/117/945/GCA_900117945.2_7468_2_77	NA	Australia	blank
Acinetobacter_baumannii_MRSN3360	Acinetobacter_baumannii_ATCC_19606	97.6993	Acinetobacter baumannii	GCA_006492795.1	https://ftp.ncbi.nlm.nih.gov/genomes/all/GCA/006/492/795/GCA_006492795.1_ASM649279v1	blood	USA	Homo sapiens
Acinetobacter_baumannii_4300STDY7045766	Acinetobacter_baumannii_DSM_30007	97.6993	Acinetobacter baumannii	GCA_900495345.1	https://ftp.ncbi.nlm.nih.gov/genomes/all/GCA/900/495/345/GCA_900495345.1_24276_2_232	blank	blank	blank
Acinetobacter_baumannii_2004ZJAB5	Acinetobacter_baumannii_DSM_30007	97.6994	Acinetobacter baumannii	GCA_000804955.1	https://ftp.ncbi.nlm.nih.gov/genomes/all/GCA/000/804/955/GCA_000804955.1_ASM80495v1	sputum	China: Zhejiang	Homo sapiens
Acinetobacter_baumannii_172830	Acinetobacter_baumannii_ATCC_19606	97.6995	Acinetobacter baumannii	GCA_014560095.1	https://ftp.ncbi.nlm.nih.gov/genomes/all/GCA/014/560/095/GCA_014560095.1_ASM1456009v1	urine	China	Homo sapiens
Acinetobacter_baumannii_LWSS-_03-02-11B	Acinetobacter_baumannii_DSM_30007	97.6996	Acinetobacter baumannii	GCA_005298085.1	https://ftp.ncbi.nlm.nih.gov/genomes/all/GCA/005/298/085/GCA_005298085.1_ASM529808v1	water	Germany	blank
Acinetobacter_baumannii_XH683	Acinetobacter_baumannii_DSM_30007	97.7003	Acinetobacter baumannii	GCA_001864555.1	https://ftp.ncbi.nlm.nih.gov/genomes/all/GCA/001/864/555/GCA_001864555.1_ASM186455v1	sputum	China: Hangzhou	Homo sapiens
Acinetobacter_baumannii_XH690	Acinetobacter_baumannii_ATCC_19606	97.7003	Acinetobacter baumannii	GCA_001863975.1	https://ftp.ncbi.nlm.nih.gov/genomes/all/GCA/001/863/975/GCA_001863975.1_ASM186397v1	sputum	China: Hangzhou	Homo sapiens
Acinetobacter_baumannii_ABBL056	Acinetobacter_baumannii_JCM_6841	97.7004	Acinetobacter baumannii	GCA_001414815.1	https://ftp.ncbi.nlm.nih.gov/genomes/all/GCA/001/414/815/GCA_001414815.1_ASM141481v1	Blood	USA: Chicago	Homo sapiens
Acinetobacter_baumannii_UMB002	Acinetobacter_baumannii_ATCC_19606	97.7004	Acinetobacter baumannii	GCA_000184495.2	https://ftp.ncbi.nlm.nih.gov/genomes/all/GCA/000/184/495/GCA_000184495.2_ASM18449v2	peri-anal swab	blank	Homo sapiens
Acinetobacter_baumannii_ARLG-1788	Acinetobacter_baumannii_DSM_30007	97.7006	Acinetobacter baumannii	GCA_002184325.1	https://ftp.ncbi.nlm.nih.gov/genomes/all/GCA/002/184/325/GCA_002184325.1_ASM218432v1	blood	USA: Unknown	blank
Acinetobacter_baumannii_1043794	Acinetobacter_baumannii_ATCC_19606	97.7007	Acinetobacter baumannii	GCA_000580415.1	https://ftp.ncbi.nlm.nih.gov/genomes/all/GCA/000/580/415/GCA_000580415.1_ASM58041v1	perirectal	USA	Homo sapiens
Acinetobacter_baumannii_ABH008	Acinetobacter_baumannii_DSM_30007	97.7007	Acinetobacter baumannii	GCA_016767975.1	https://ftp.ncbi.nlm.nih.gov/genomes/all/GCA/016/767/975/GCA_016767975.1_ASM1676797v1	blank	Iran: Tehran	Homo sapiens
Acinetobacter_baumannii_MRSN6541	Acinetobacter_baumannii_DSM_30007	97.7009	Acinetobacter baumannii	GCA_006492195.1	https://ftp.ncbi.nlm.nih.gov/genomes/all/GCA/006/492/195/GCA_006492195.1_ASM649219v1	wound	USA	Homo sapiens
Acinetobacter_haemolyticus_AN43	Acinetobacter_haemolyticus_MTCC_9819	97.7009	Acinetobacter haemolyticus	GCA_009892265.1	https://ftp.ncbi.nlm.nih.gov/genomes/all/GCA/009/892/265/GCA_009892265.1_ASM989226v1	Peritoneal dialysis liquid	Mexico: Puebla	Homo sapiens
Acinetobacter_baumannii_CCBH28245	Acinetobacter_baumannii_ATCC_19606	97.7011	Acinetobacter baumannii	GCA_015666515.1	https://ftp.ncbi.nlm.nih.gov/genomes/all/GCA/015/666/515/GCA_015666515.1_ASM1566651v1	blood	Brazil	Homo sapiens
Acinetobacter_baumannii_ABS042	Acinetobacter_baumannii_DSM_30007	97.7016	Acinetobacter baumannii	GCA_009497615.1	https://ftp.ncbi.nlm.nih.gov/genomes/all/GCA/009/497/615/GCA_009497615.1_ASM949761v1	wound	Iran	Homo sapiens
Acinetobacter_pittii_ARLG1798	Acinetobacter_pittii_ATCC_19004	97.7018	Acinetobacter pittii	GCA_002143255.1	https://ftp.ncbi.nlm.nih.gov/genomes/all/GCA/002/143/255/GCA_002143255.1_ASM214325v1	blank	blank	blank
Acinetobacter_baumannii_ARLG1827	Acinetobacter_baumannii_DSM_30007	97.702	Acinetobacter baumannii	GCA_002143715.1	https://ftp.ncbi.nlm.nih.gov/genomes/all/GCA/002/143/715/GCA_002143715.1_ASM214371v1	blank	blank	blank
Acinetobacter_baumannii_MRSN6273	Acinetobacter_baumannii_ATCC_19606	97.702	Acinetobacter baumannii	GCA_001444265.1	https://ftp.ncbi.nlm.nih.gov/genomes/all/GCA/001/444/265/GCA_001444265.1_ASM144426v1	sputum	USA: Maryland, Bethesda	Homo sapiens
Acinetobacter_baumannii_AB_TG27339	Acinetobacter_baumannii_DSM_30007	97.702	Acinetobacter baumannii	GCA_000302235.1	https://ftp.ncbi.nlm.nih.gov/genomes/all/GCA/000/302/235/GCA_000302235.1_ASM30223v1	sputum	blank	Homo sapiens
Acinetobacter_baumannii_MRSN15093	Acinetobacter_baumannii_ATCC_19606	97.7022	Acinetobacter baumannii	GCA_006494575.1	https://ftp.ncbi.nlm.nih.gov/genomes/all/GCA/006/494/575/GCA_006494575.1_ASM649457v1	wound	Peru	Homo sapiens
Acinetobacter_baumannii_ZQ5	Acinetobacter_baumannii_ATCC_19606	97.7023	Acinetobacter baumannii	GCA_002837955.2	https://ftp.ncbi.nlm.nih.gov/genomes/all/GCA/002/837/955/GCA_002837955.2_ASM283795v2	wound swab	Iraq: Baghdad	Homo sapiens
Acinetobacter_baumannii_AB-HZ-S73	Acinetobacter_baumannii_ATCC_19606	97.7027	Acinetobacter baumannii	GCA_006366335.1	https://ftp.ncbi.nlm.nih.gov/genomes/all/GCA/006/366/335/GCA_006366335.1_ASM636633v1	sputum	China: Hangzhou	Homo sapiens
Acinetobacter_baumannii_IHIT25424	Acinetobacter_baumannii_DSM_30007	97.7028	Acinetobacter baumannii	GCA_001704695.1	https://ftp.ncbi.nlm.nih.gov/genomes/all/GCA/001/704/695/GCA_001704695.1_ASM170469v1	blank	Germany	Homo sapiens
Acinetobacter_pittii_ARLG1804	Acinetobacter_pittii_DSM_25618	97.7029	Acinetobacter pittii	GCA_002143505.1	https://ftp.ncbi.nlm.nih.gov/genomes/all/GCA/002/143/505/GCA_002143505.1_ASM214350v1	blank	blank	blank
Acinetobacter_baumannii_ABUH383	Acinetobacter_baumannii_ATCC_19606	97.7033	Acinetobacter baumannii	GCA_002182545.1	https://ftp.ncbi.nlm.nih.gov/genomes/all/GCA/002/182/545/GCA_002182545.1_ASM218254v1	MISC	USA	Homo sapiens
Acinetobacter_baumannii_MRSN15075	Acinetobacter_baumannii_ATCC_19606	97.7033	Acinetobacter baumannii	GCA_006494055.1	https://ftp.ncbi.nlm.nih.gov/genomes/all/GCA/006/494/055/GCA_006494055.1_ASM649405v1	wound	USA	Homo sapiens
Acinetobacter_towneri_19110F47	Acinetobacter_towneri_DSM_14962	97.7036	Acinetobacter towneri	GCA_009676805.1	https://ftp.ncbi.nlm.nih.gov/genomes/all/GCA/009/676/805/GCA_009676805.1_ASM967680v1	feces	China:Henan	swine
Acinetobacter_baumannii_19A2655	Acinetobacter_baumannii_DSM_30007	97.7036	Acinetobacter baumannii	GCA_019352455.1	https://ftp.ncbi.nlm.nih.gov/genomes/all/GCA/019/352/455/GCA_019352455.1_ASM1935245v1	Rectal	Reunion	Homo sapiens
Acinetobacter_baumannii_9201	Acinetobacter_baumannii_ATCC_19606	97.7037	Acinetobacter baumannii	GCA_003522665.1	https://ftp.ncbi.nlm.nih.gov/genomes/all/GCA/003/522/665/GCA_003522665.1_ASM352266v1	blood	Mexico: Guadalajara	Homo sapiens
Acinetobacter_baumannii_Aci00880	Acinetobacter_baumannii_DSM_30007	97.7038	Acinetobacter baumannii	GCA_902703085.1	https://ftp.ncbi.nlm.nih.gov/genomes/all/GCA/902/703/085/GCA_902703085.1_Aci00880	clinical material	blank	blank
Acinetobacter_baumannii_4300STDY7045770	Acinetobacter_baumannii_DSM_30007	97.7039	Acinetobacter baumannii	GCA_900495415.1	https://ftp.ncbi.nlm.nih.gov/genomes/all/GCA/900/495/415/GCA_900495415.1_24276_2_236	blank	blank	blank
Acinetobacter_baumannii_ABUH502	Acinetobacter_baumannii_DSM_30007	97.7043	Acinetobacter baumannii	GCA_002182345.1	https://ftp.ncbi.nlm.nih.gov/genomes/all/GCA/002/182/345/GCA_002182345.1_ASM218234v1	WOUND/ABSCESS	USA	Homo sapiens
Acinetobacter_baumannii_810CP	Acinetobacter_baumannii_ATCC_19606	97.7043	Acinetobacter baumannii	GCA_003345235.1	https://ftp.ncbi.nlm.nih.gov/genomes/all/GCA/003/345/235/GCA_003345235.1_ASM334523v1	feces	Mexico: Mexico City	Homo sapiens
Acinetobacter_baumannii_TG15434	Acinetobacter_baumannii_DSM_30007	97.7045	Acinetobacter baumannii	GCA_003948675.1	https://ftp.ncbi.nlm.nih.gov/genomes/all/GCA/003/948/675/GCA_003948675.1_ASM394867v1	environmental	USA: Arizona	Homo sapiens
Acinetobacter_baumannii_ARLG1794	Acinetobacter_baumannii_DSM_30007	97.7045	Acinetobacter baumannii	GCA_002143185.1	https://ftp.ncbi.nlm.nih.gov/genomes/all/GCA/002/143/185/GCA_002143185.1_ASM214318v1	blank	blank	blank
Acinetobacter_nosocomialis_AC15131	Acinetobacter_nosocomialis_NIPH_2119	97.7047	Acinetobacter nosocomialis	GCA_017837765.1	https://ftp.ncbi.nlm.nih.gov/genomes/all/GCA/017/837/765/GCA_017837765.1_ASM1783776v1	cerebrospinal fluid	Malaysia	Homo sapiens
Acinetobacter_baumannii_MRSN7446	Acinetobacter_baumannii_ATCC_19606	97.7049	Acinetobacter baumannii	GCA_006492885.1	https://ftp.ncbi.nlm.nih.gov/genomes/all/GCA/006/492/885/GCA_006492885.1_ASM649288v1	wound	USA	Homo sapiens
Acinetobacter_baumannii_MRSN32108	Acinetobacter_baumannii_DSM_30007	97.7052	Acinetobacter baumannii	GCA_006492525.1	https://ftp.ncbi.nlm.nih.gov/genomes/all/GCA/006/492/525/GCA_006492525.1_ASM649252v1	wound	Germany	Homo sapiens
Acinetobacter_baumannii_OCU_Ac16a	Acinetobacter_baumannii_DSM_30007	97.7053	Acinetobacter baumannii	GCA_001895125.2	https://ftp.ncbi.nlm.nih.gov/genomes/all/GCA/001/895/125/GCA_001895125.2_ASM189512v2	Tracheal aspirate from a hospitalized patient	Japan:Osaka	Homo sapiens
Acinetobacter_sp._225588	Acinetobacter_pittii_DSM_25618	97.7053	Acinetobacter pittii	GCA_000588415.1	https://ftp.ncbi.nlm.nih.gov/genomes/all/GCA/000/588/415/GCA_000588415.1_ASM58841v1	sputum	USA	Homo sapiens
Acinetobacter_proteolyticus_ANC_3849	Acinetobacter_proteolyticus_NIPH_809	97.7057	Acinetobacter proteolyticus	GCA_001753605.1	https://ftp.ncbi.nlm.nih.gov/genomes/all/GCA/001/753/605/GCA_001753605.1_ASM175360v1	leg wound	Czech Republic: Ostrava	Homo sapiens
Acinetobacter_haemolyticus_AN59	Acinetobacter_haemolyticus_MTCC_9819	97.7059	Acinetobacter haemolyticus	GCA_009892245.1	https://ftp.ncbi.nlm.nih.gov/genomes/all/GCA/009/892/245/GCA_009892245.1_ASM989224v1	Peritoneal dialysis liquid	Mexico: Puebla	Homo sapiens
Acinetobacter_baumannii_19A2710	Acinetobacter_baumannii_DSM_30007	97.7061	Acinetobacter baumannii	GCA_019352315.1	https://ftp.ncbi.nlm.nih.gov/genomes/all/GCA/019/352/315/GCA_019352315.1_ASM1935231v1	Rectal	Reunion	Homo sapiens
Acinetobacter_baumannii_AR_0036	Acinetobacter_baumannii_DSM_30007	97.7062	Acinetobacter baumannii	GCA_001874685.1	https://ftp.ncbi.nlm.nih.gov/genomes/all/GCA/001/874/685/GCA_001874685.1_ASM187468v1	blank	blank	blank
Acinetobacter_baumannii_s222	Acinetobacter_baumannii_DSM_30007	97.7062	Acinetobacter baumannii	GCA_003356705.1	https://ftp.ncbi.nlm.nih.gov/genomes/all/GCA/003/356/705/GCA_003356705.1_ASM335670v1	sputum	China	Homo sapiens
Acinetobacter_baumannii_AR_0078	Acinetobacter_baumannii_DSM_30007	97.7064	Acinetobacter baumannii	GCA_002948925.1	https://ftp.ncbi.nlm.nih.gov/genomes/all/GCA/002/948/925/GCA_002948925.1_ASM294892v1	blank	blank	blank
Acinetobacter_baumannii_NIPH_290	Acinetobacter_baumannii_DSM_30007	97.7064	Acinetobacter baumannii	GCA_000369325.1	https://ftp.ncbi.nlm.nih.gov/genomes/all/GCA/000/369/325/GCA_000369325.1_Acin_baum_NIPH_290_V1	blank	blank	blank
Acinetobacter_baumannii_484_16	Acinetobacter_baumannii_DSM_30007	97.7067	Acinetobacter baumannii	GCA_015537665.1	https://ftp.ncbi.nlm.nih.gov/genomes/all/GCA/015/537/665/GCA_015537665.1_ASM1553766v1	tracheal secretion	Brazil: Presidente Prudente	Homo sapiens
Acinetobacter_baumannii_ARLG1858	Acinetobacter_baumannii_DSM_30007	97.707	Acinetobacter baumannii	GCA_002143145.1	https://ftp.ncbi.nlm.nih.gov/genomes/all/GCA/002/143/145/GCA_002143145.1_ASM214314v1	blank	blank	blank
Acinetobacter_baumannii_A388	Acinetobacter_baumannii_DSM_30007	97.7071	Acinetobacter baumannii	GCA_002741415.1	https://ftp.ncbi.nlm.nih.gov/genomes/all/GCA/002/741/415/GCA_002741415.1_ASM274141v1	blank	Greece	Homo sapiens
Acinetobacter_baumannii_AB-HZ-S04	Acinetobacter_baumannii_DSM_30007	97.7074	Acinetobacter baumannii	GCA_006365515.1	https://ftp.ncbi.nlm.nih.gov/genomes/all/GCA/006/365/515/GCA_006365515.1_ASM636551v1	sputum	China: Hangzhou	Homo sapiens
Acinetobacter_baumannii_ABAY13019	Acinetobacter_baumannii_DSM_30007	97.7083	Acinetobacter baumannii	GCA_009736295.1	https://ftp.ncbi.nlm.nih.gov/genomes/all/GCA/009/736/295/GCA_009736295.1_ASM973629v1	blood sample from a 65 year old man who was hospitalized in ICU	South Korea: Seoul	Homo sapiens
Acinetobacter_baumannii_UH384_444	Acinetobacter_baumannii_DSM_30007	97.7086	Acinetobacter baumannii	GCA_000809925.3	https://ftp.ncbi.nlm.nih.gov/genomes/all/GCA/000/809/925/GCA_000809925.3_ASM80992v3	Tissues	USA	Homo sapiens
Acinetobacter_baumannii_ABBL001	Acinetobacter_baumannii_ATCC_19606	97.7086	Acinetobacter baumannii	GCA_001432685.1	https://ftp.ncbi.nlm.nih.gov/genomes/all/GCA/001/432/685/GCA_001432685.1_ASM143268v1	Blood	USA: Chicago	Homo sapiens
Acinetobacter_baumannii_2015ZJAB9	Acinetobacter_baumannii_DSM_30007	97.7086	Acinetobacter baumannii	GCA_009753775.1	https://ftp.ncbi.nlm.nih.gov/genomes/all/GCA/009/753/775/GCA_009753775.1_ASM975377v1	sputum	China: Hangzhou	Homo sapiens
Acinetobacter_baumannii_KR3831	Acinetobacter_baumannii_DSM_30007	97.7088	Acinetobacter baumannii	GCA_003185745.1	https://ftp.ncbi.nlm.nih.gov/genomes/all/GCA/003/185/745/GCA_003185745.1_ASM318574v1	blank	Oman: Muscat	Homo sapiens
Acinetobacter_baumannii_SC02	Acinetobacter_baumannii_DSM_30007	97.7091	Acinetobacter baumannii	GCA_020657695.1	https://ftp.ncbi.nlm.nih.gov/genomes/all/GCA/020/657/695/GCA_020657695.1_ASM2065769v1	tracheal aspirate	Brazil: Pelotas	Homo sapiens
Acinetobacter_baumannii_4300STDY7045847	Acinetobacter_baumannii_DSM_30007	97.7091	Acinetobacter baumannii	GCA_900496165.1	https://ftp.ncbi.nlm.nih.gov/genomes/all/GCA/900/496/165/GCA_900496165.1_24276_3_6	blank	blank	blank
Acinetobacter_nosocomialis_TUM15325	Acinetobacter_nosocomialis_NIPH_2119	97.7092	Acinetobacter nosocomialis	GCA_008997595.1	https://ftp.ncbi.nlm.nih.gov/genomes/all/GCA/008/997/595/GCA_008997595.1_ASM899759v1	human sputum	Japan:Tokyo	Homo sapiens
Acinetobacter_pittii_TG22176	Acinetobacter_pittii_ATCC_19004	97.7095	Acinetobacter pittii	GCA_003947895.1	https://ftp.ncbi.nlm.nih.gov/genomes/all/GCA/003/947/895/GCA_003947895.1_ASM394789v1	wound	USA: Arizona	Homo sapiens
Acinetobacter_baumannii_ABUH642	Acinetobacter_baumannii_DSM_30007	97.7095	Acinetobacter baumannii	GCA_002016785.1	https://ftp.ncbi.nlm.nih.gov/genomes/all/GCA/002/016/785/GCA_002016785.1_ASM201678v1	sputum	USA: Ohio	Homo sapiens
Acinetobacter_sp._FDAARGOS_495	Acinetobacter_baumannii_DSM_30007	97.7096	Acinetobacter baumannii	GCA_003938905.1	https://ftp.ncbi.nlm.nih.gov/genomes/all/GCA/003/938/905/GCA_003938905.1_ASM393890v1	Unknown	blank	Homo sapiens
Acinetobacter_baumannii_MRSN3941	Acinetobacter_baumannii_DSM_30007	97.71	Acinetobacter baumannii	GCA_001444215.1	https://ftp.ncbi.nlm.nih.gov/genomes/all/GCA/001/444/215/GCA_001444215.1_ASM144421v1	leg	USA: Maryland, Bethesda	Homo sapiens
Acinetobacter_baumannii_s215	Acinetobacter_baumannii_DSM_30007	97.7101	Acinetobacter baumannii	GCA_003356845.1	https://ftp.ncbi.nlm.nih.gov/genomes/all/GCA/003/356/845/GCA_003356845.1_ASM335684v1	sputum	China	Homo sapiens
Acinetobacter_indicus_GXNN15X4	Acinetobacter_indicus_CIP_110367	97.7103	Acinetobacter indicus	GCA_017309425.1	https://ftp.ncbi.nlm.nih.gov/genomes/all/GCA/017/309/425/GCA_017309425.1_ASM1730942v1	feces	China:Guangxi	porcine
Acinetobacter_nosocomialis_AC15183	Acinetobacter_nosocomialis_NIPH_2119	97.7105	Acinetobacter nosocomialis	GCA_017837845.1	https://ftp.ncbi.nlm.nih.gov/genomes/all/GCA/017/837/845/GCA_017837845.1_ASM1783784v1	blood	Malaysia	Homo sapiens
Acinetobacter_baumannii_PR329	Acinetobacter_baumannii_DSM_30007	97.7107	Acinetobacter baumannii	GCA_002137575.1	https://ftp.ncbi.nlm.nih.gov/genomes/all/GCA/002/137/575/GCA_002137575.1_ASM213757v1	blank	blank	blank
Acinetobacter_pittii_ACIN00171	Acinetobacter_pittii_ATCC_19004	97.7107	Acinetobacter pittii	GCA_016502795.1	https://ftp.ncbi.nlm.nih.gov/genomes/all/GCA/016/502/795/GCA_016502795.1_ASM1650279v1	sputum	USA: Pittsburgh, Pennsylvania	Homo sapiens
Acinetobacter_baumannii_ZQ6	Acinetobacter_baumannii_DSM_30007	97.7107	Acinetobacter baumannii	GCA_002838005.2	https://ftp.ncbi.nlm.nih.gov/genomes/all/GCA/002/838/005/GCA_002838005.2_ASM283800v2	wound swab	Iraq: Baghdad	Homo sapiens
Acinetobacter_baumannii_550_16	Acinetobacter_baumannii_DSM_30007	97.711	Acinetobacter baumannii	GCA_015537865.1	https://ftp.ncbi.nlm.nih.gov/genomes/all/GCA/015/537/865/GCA_015537865.1_ASM1553786v1	tracheal secretion	Brazil: Presidente Prudente	Homo sapiens
Acinetobacter_baumannii_AB5075	Acinetobacter_baumannii_DSM_30007	97.7111	Acinetobacter baumannii	GCA_000770605.1	https://ftp.ncbi.nlm.nih.gov/genomes/all/GCA/000/770/605/GCA_000770605.1_gabab5075v1.0	bone culture	USA	Homo sapiens
Acinetobacter_baumannii_PR361	Acinetobacter_baumannii_DSM_30007	97.7112	Acinetobacter baumannii	GCA_002136995.1	https://ftp.ncbi.nlm.nih.gov/genomes/all/GCA/002/136/995/GCA_002136995.1_ASM213699v1	blank	blank	blank
Acinetobacter_baumannii_Aci00759	Acinetobacter_baumannii_DSM_30007	97.7113	Acinetobacter baumannii	GCA_904887015.1	https://ftp.ncbi.nlm.nih.gov/genomes/all/GCA/904/887/015/GCA_904887015.1_Aci00759-181019_contigs_filtered.fa.gz	clinical material	blank	blank
Acinetobacter_pittii_UKK-0548	Acinetobacter_pittii_ATCC_19004	97.7113	Acinetobacter pittii	GCA_001706775.1	https://ftp.ncbi.nlm.nih.gov/genomes/all/GCA/001/706/775/GCA_001706775.1_ASM170677v1	blank	Germany: somewhere in SN	Homo sapiens
Acinetobacter_baumannii_4300STDY7045880	Acinetobacter_baumannii_DSM_30007	97.7115	Acinetobacter baumannii	GCA_900496605.1	https://ftp.ncbi.nlm.nih.gov/genomes/all/GCA/900/496/605/GCA_900496605.1_24276_3_38	blank	blank	blank
Acinetobacter_baumannii_4300STDY7045857	Acinetobacter_baumannii_ATCC_19606	97.7115	Acinetobacter baumannii	GCA_900496365.1	https://ftp.ncbi.nlm.nih.gov/genomes/all/GCA/900/496/365/GCA_900496365.1_24276_3_16	blank	blank	blank
Acinetobacter_baumannii_MRSN_57	Acinetobacter_baumannii_DSM_30007	97.7118	Acinetobacter baumannii	GCA_000586635.1	https://ftp.ncbi.nlm.nih.gov/genomes/all/GCA/000/586/635/GCA_000586635.1_MRSN57	wound	USA	Homo sapiens
Acinetobacter_baumannii_XH686	Acinetobacter_baumannii_JCM_6841	97.7119	Acinetobacter baumannii	GCA_001864635.1	https://ftp.ncbi.nlm.nih.gov/genomes/all/GCA/001/864/635/GCA_001864635.1_ASM186463v1	sputum	China: Hangzhou	Homo sapiens
Acinetobacter_indicus_TQ23	Acinetobacter_indicus_CIP_110367	97.7119	Acinetobacter indicus	GCA_009914475.1	https://ftp.ncbi.nlm.nih.gov/genomes/all/GCA/009/914/475/GCA_009914475.1_ASM991447v1	cow feces	China: Jiangsu	Cows
Acinetobacter_baumannii_478_16	Acinetobacter_baumannii_ATCC_19606	97.7121	Acinetobacter baumannii	GCA_015538165.1	https://ftp.ncbi.nlm.nih.gov/genomes/all/GCA/015/538/165/GCA_015538165.1_ASM1553816v1	tracheal secretion	Brazil: Presidente Prudente	Homo sapiens
Acinetobacter_baumannii_MRSN_3527	Acinetobacter_baumannii_DSM_30007	97.7125	Acinetobacter baumannii	GCA_001028325.1	https://ftp.ncbi.nlm.nih.gov/genomes/all/GCA/001/028/325/GCA_001028325.1_gdodcwi02_v01	wound	USA	Homo sapiens
Acinetobacter_baumannii_MCR56	Acinetobacter_baumannii_DSM_30007	97.7125	Acinetobacter baumannii	GCA_002928195.1	https://ftp.ncbi.nlm.nih.gov/genomes/all/GCA/002/928/195/GCA_002928195.1_ASM292819v1	blood	Honduras: Cortes, San Pedro Sula	Homo sapiens
Acinetobacter_junii_AMA32	Acinetobacter_junii_CIP_64.5	97.7126	Acinetobacter junii	GCA_009645695.1	https://ftp.ncbi.nlm.nih.gov/genomes/all/GCA/009/645/695/GCA_009645695.1_ASM964569v1	blank	blank	Homo sapiens
Acinetobacter_pittii_AS012629	Acinetobacter_lactucae_NRRL_B-41902	97.7127	Acinetobacter lactucae	GCA_010612445.1	https://ftp.ncbi.nlm.nih.gov/genomes/all/GCA/010/612/445/GCA_010612445.1_ASM1061244v1	lung	USA	Homo sapiens
Acinetobacter_baumannii_4300STDY7045714	Acinetobacter_baumannii_DSM_30007	97.7127	Acinetobacter baumannii	GCA_900494875.1	https://ftp.ncbi.nlm.nih.gov/genomes/all/GCA/900/494/875/GCA_900494875.1_24276_2_180	blank	blank	blank
Acinetobacter_baumannii_2004ZJAB6	Acinetobacter_baumannii_DSM_30007	97.7127	Acinetobacter baumannii	GCA_000804965.1	https://ftp.ncbi.nlm.nih.gov/genomes/all/GCA/000/804/965/GCA_000804965.1_ASM80496v1	sputum	China: Zhejiang	Homo sapiens
Acinetobacter_baumannii_ABBL003	Acinetobacter_baumannii_DSM_30007	97.713	Acinetobacter baumannii	GCA_001432375.1	https://ftp.ncbi.nlm.nih.gov/genomes/all/GCA/001/432/375/GCA_001432375.1_ASM143237v1	Blood	USA: Chicago	Homo sapiens
Acinetobacter_baumannii_3.5D	Acinetobacter_baumannii_DSM_30007	97.7131	Acinetobacter baumannii	GCA_001693095.1	https://ftp.ncbi.nlm.nih.gov/genomes/all/GCA/001/693/095/GCA_001693095.1_ASM169309v1	blank	Germany	goose
Acinetobacter_baumannii_ACIN00248	Acinetobacter_baumannii_DSM_30007	97.7136	Acinetobacter baumannii	GCA_016506265.1	https://ftp.ncbi.nlm.nih.gov/genomes/all/GCA/016/506/265/GCA_016506265.1_ASM1650626v1	wound	USA: Pittsburgh, Pennsylvania	Homo sapiens
Acinetobacter_baumannii_4300STDY7045874	Acinetobacter_baumannii_ATCC_19606	97.7138	Acinetobacter baumannii	GCA_900496545.1	https://ftp.ncbi.nlm.nih.gov/genomes/all/GCA/900/496/545/GCA_900496545.1_24276_3_32	blank	blank	blank
Acinetobacter_baumannii_19A2668	Acinetobacter_baumannii_CIP_70.34	97.7141	Acinetobacter baumannii	GCA_019352415.1	https://ftp.ncbi.nlm.nih.gov/genomes/all/GCA/019/352/415/GCA_019352415.1_ASM1935241v1	blood	Reunion	Homo sapiens
Acinetobacter_baumannii_300_16	Acinetobacter_baumannii_ATCC_19606	97.7142	Acinetobacter baumannii	GCA_015537915.1	https://ftp.ncbi.nlm.nih.gov/genomes/all/GCA/015/537/915/GCA_015537915.1_ASM1553791v1	blood	Brazil: Sao Paulo	Homo sapiens
Acinetobacter_baumannii_TG69784	Acinetobacter_baumannii_ATCC_19606	97.7143	Acinetobacter baumannii	GCA_003948835.1	https://ftp.ncbi.nlm.nih.gov/genomes/all/GCA/003/948/835/GCA_003948835.1_ASM394883v1	urine	USA: Arizona	Homo sapiens
Acinetobacter_nosocomialis_TG21145	Acinetobacter_nosocomialis_LMG_10619	97.7146	Acinetobacter nosocomialis	GCA_000301775.1	https://ftp.ncbi.nlm.nih.gov/genomes/all/GCA/000/301/775/GCA_000301775.1_ASM30177v1	blank	blank	blank
Acinetobacter_baumannii_4300STDY7045752	Acinetobacter_baumannii_DSM_30007	97.7146	Acinetobacter baumannii	GCA_900495545.1	https://ftp.ncbi.nlm.nih.gov/genomes/all/GCA/900/495/545/GCA_900495545.1_24276_2_218	blank	blank	blank
Acinetobacter_baumannii_T1060578	Acinetobacter_baumannii_DSM_30007	97.7147	Acinetobacter baumannii	GCA_019323815.1	https://ftp.ncbi.nlm.nih.gov/genomes/all/GCA/019/323/815/GCA_019323815.1_ASM1932381v1	sputum	Taiwan	Homo sapiens
Acinetobacter_baumannii_MRSN5540	Acinetobacter_baumannii_ATCC_19606	97.7147	Acinetobacter baumannii	GCA_001444225.1	https://ftp.ncbi.nlm.nih.gov/genomes/all/GCA/001/444/225/GCA_001444225.1_ASM144422v1	blood	USA: Maryland, Bethesda	Homo sapiens
Acinetobacter_baumannii_MRSN7690	Acinetobacter_baumannii_DSM_30007	97.7149	Acinetobacter baumannii	GCA_006491975.1	https://ftp.ncbi.nlm.nih.gov/genomes/all/GCA/006/491/975/GCA_006491975.1_ASM649197v1	wound	USA	Homo sapiens
Acinetobacter_baumannii_INTEC_OZFC7	Acinetobacter_baumannii_DSM_30007	97.715	Acinetobacter baumannii	GCA_017897205.1	https://ftp.ncbi.nlm.nih.gov/genomes/all/GCA/017/897/205/GCA_017897205.1_ASM1789720v1	Ozama River	Dominican Republic: Santo Domingo	blank
Acinetobacter_baumannii_NIPH_201	Acinetobacter_baumannii_DSM_30007	97.7151	Acinetobacter baumannii	GCA_000369165.1	https://ftp.ncbi.nlm.nih.gov/genomes/all/GCA/000/369/165/GCA_000369165.1_Acin_baum_NIPH_201_V1	blank	blank	blank
[truncated: 4,925 more rows]

## Sheet: Sheet2
Acinetobacter sp. 'aerobic (ED)'	Bacteria;Proteobacteria;Gammaproteobacteria	Aci00763	SAMEA7451223	PRJEB40828	GCA_904886855.1	Contig	3.87533	42.9		CAJHGI01	23	3591	2021-01-25T00:00:00Z	ftp://ftp.ncbi.nlm.nih.gov/genomes/all/GCA/904/886/855/GCA_904886855.1_Aci00763-181019_contigs_filtered.fa.gz	ftp://ftp.ncbi.nlm.nih.gov/genomes/all/GCF/904/886/855/GCF_904886855.1_Aci00763-181019_contigs_filtered.fa.gz
[truncated: 1 more rows]
