# Supplementary material for: Genome-wide identification and oxacillinase OXA distribution characteristics of Acinetobacter spp. based on a global database
Source: Front Microbiol. 2023 Jun 1;14:1174200. doi: 10.3389/fmicb.2023.1174200 (PMC10267304; doi:10.3389/fmicb.2023.1174200)
Supplement: Supplementary file 3 [file Table_3.xlsx]

## Sheet: Sheet1
Table S3.Country of OXA isolating strains
Country of OXA isolating strains	Sample
Afghanistan	6
Antarctica	2
Argentina	13
Australia	75
Bangladesh	1
Belgium	12
Benin	1
Bolivia	17
Brazil	134
Cambodia	2
Canada	37
Chile	7
China	1191
Colombia	2
Croatia	11
Czech	24
Denmark	2
Dominican	6
Egypt	24
Estonia	1
Ethiopia	3
Finland	2
France	101
Georgia	4
Germany	205
Ghana	6
Greece	43
Honduras	24
Hong Kong	14
Hungary	2
India	279
Indonesia	1
Iran	11
Iraq	26
Israel	5
Italy	8
Japan	69
Jordan	2
Kazakhstan	1
Kenya	24
Kuwait	36
Lebanon	64
Luxembourg	1
Malaysia	71
Mexico	55
Netherlands	8
Nigeria	10
Norway	2
Oman	1
Pacific Ocean	4
Pakistan	89
Peru	4
Poland	11
Portugal	21
Puerto Rico	2
Reunion	6
Romania	4
Russia	30
Saudi Arabia	13
Serbia	8
Singapore	34
South Africa	9
South Korea	145
Spain	19
Sudan	15
Svalbard	1
Sweden	1
Switzerland	20
Taiwan	42
Tanzania	6
Thailand	63
Togo	2
Turkey	10
Ukraine	9
United Arab Emirates	1
United Kingdom	13
United States	1315
Viet Nam	3
blank	1345
